# Supplementary material
Source: Research Square preprint supplement (doi:10.21203/rs.3.rs-8983924/v1)
Supplement: Supplementary file 1 [file 1c0e6feeeb00dd2f1efdad9f.xlsx]

## Sheet: Table S1
Order	TranId	Bs_Genes	Desc	Num_of_Samples	EXP:Young_1:FPKM	EXP:Young_2:FPKM	EXP:Young_3:FPKM	EXP:Inter_1:FPKM	EXP:Inter_2:FPKM	EXP:Inter_3:FPKM	EXP:Mature_1:FPKM	EXP:Mature_2:FPKM	EXP:Mature_3:FPKM
1	TBIM000001	Bsv0100-00000001-RA	Transmembrane emp24 domain-containing protein p24beta3 [Source:SWISS;Acc:Q9LIL4]	9	10.8412	12.0934	12.2006	8.72409	11.3455	7.5934	5.32895	5.64923	5.24481
2	TBIM000002	Bsv0100-00000002-RA	Transposon TX1 uncharacterized 149 kDa protein [Source:SWISS;Acc:P14381]	9	0	0	0	0	0	0	0	0	0
3	TBIM000003	Bsv0100-00000003-RA	Serine/threonine-protein phosphatase 6 regulatory ankyrin repeat subunit B [Source:SWISS;Acc:Q5F478]	9	0	0	0	0	0	0	0	0	0
4	TBIM000004	Bsv0100-00000004-RA	Endoplasmic reticulum metallopeptidase 1 [Source:SWISS;Acc:Q7Z2K6]	9	23.2686	22.8924	17.6139	23.693	21.1777	17.3443	13.9434	14.1233	13.5174
5	TBIM000005	Bsv0100-00000005-RA	-	9	0	0	0	0	0	0	0	0	0
6	TBIM000006	Bsv0100-00000006-RA	Protein lap4 [Source:SWISS;Acc:Q7KRY7]	9	21.1655	20.4033	24.7974	18.5033	20.4603	21.1687	10.7788	13.5795	13.9083
7	TBIM000007	Bsv0100-00000007-RA	Zinc finger CCCH domain-containing protein 32 [Source:SWISS;Acc:Q84W91]	9	16.0123	16.5213	14.6497	17.7521	16.9245	13.8672	18.1835	11.713	12.154
8	TBIM000008	Bsv0100-00000008-RA	Expansin-like A1 [Source:SWISS;Acc:Q9LZT4]	9	0	0	0	0	0	0	0	0	0
9	TBIM000009	Bsv0100-00000009-RA	Pyruvate kinase isozyme A, chloroplastic [Source:SWISS;Acc:Q43117]	9	35.8314	37.0795	37.1163	33.1536	33.3496	27.5909	21.3119	20.5522	17.6625
10	TBIM000010	Bsv0100-00000010-RA	Protein FAR-RED ELONGATED HYPOCOTYL 3 [Source:SWISS;Acc:Q9LIE5]	9	0	0	0	0	0	0	0	0	0
11	TBIM000011	Bsv0100-00000011-RA	-	9	0	0	0	0	0	0	0	0	0
12	TBIM000012	Bsv0100-00000012-RA	-	9	15.8486	15.9132	17.9281	18.0857	15.5033	17.0461	12.6602	11.9793	16.0674
13	TBIM000013	Bsv0100-00000013-RA	Protein ALWAYS EARLY 3 [Source:SWISS;Acc:Q6A332]	9	13.0034	11.7159	15.6215	11.4592	13.1124	11.8559	8.74568	9.51759	9.80815
14	TBIM000014	Bsv0100-00000014-RA	Chromatin structure-remodeling complex protein SYD [Source:SWISS;Acc:F4IHS2]	9	30.1658	26.6276	34.9647	24.0694	30.4616	22.2911	14.2666	17.6655	21.2558
15	TBIM000015	Bsv0100-00000015-RA	-	9	0	0	0	0	0	0	0	0	0
16	TBIM000016	Bsv0100-00000016-RA	Phosphoinositide phosphatase SAC2 [Source:SWISS;Acc:Q94A27]	9	24.9758	22.9293	17.2845	21.1972	19.7429	13.7339	17.8458	11.9367	11.3324
17	TBIM000017	Bsv0100-00000017-RA	Phosphoinositide phosphatase SAC2 [Source:SWISS;Acc:Q94A27]	9	0.191451	0.146225	0.130473	0.0433334	0	0.0502356	0.162709	0.0770417	0.131396
18	TBIM000018	Bsv0100-00000018-RA	40S ribosomal protein SA [Source:SWISS;Acc:O65751]	9	349.456	370.418	413.274	282.695	282.246	334.278	136.024	167.147	125.74
19	TBIM000019	Bsv0100-00000019-RA	Reticuline oxidase-like protein [Source:SWISS;Acc:Q9SVG4]	9	0.122805	0	0	0.09247	0.0442712	0.0531093	0	0	0
20	TBIM000020	Bsv0100-00000020-RA	Inactive tetrahydrocannabinolic acid synthase [Source:SWISS;Acc:Q33DQ2]	9	0.67874	0.683088	0	0	0.386693	0	0	0	0
21	TBIM000021	Bsv0100-00000021-RA	-	9	0	0	0	0	0	0	0	0	0
22	TBIM000022	Bsv0100-00000022-RA	-	9	0	0	0	0	0	0	0	0	0
23	TBIM000023	Bsv0100-00000023-RA	GDSL esterase/lipase 4 [Source:SWISS;Acc:Q9LJP1]	9	0.0453891	0	0	0.0512344	0	0.0593709	0.193763	0.224593	0
24	TBIM000024	Bsv0100-00000024-RA	-	9	0	0	0	0	0	0	0	0	0
25	TBIM000025	Bsv0100-00000025-RA	-	9	0.152816	0.0740172	0.17858	0.266478	0.25324	0.199385	0.246067	0.306949	0.142743
26	TBIM000026	Bsv0100-00000026-RA	GDSL esterase/lipase 4 [Source:SWISS;Acc:Q9LJP1]	9	0.111962	0.107761	0.0639816	0.0640061	0.0612641	0.0733278	0	0.164908	0.182043
27	TBIM000027	Bsv0100-00000027-RA	-	9	0	0	0	0	0	0	0	0	0
28	TBIM000028	Bsv0100-00000028-RA	GDSL esterase/lipase 4 [Source:SWISS;Acc:Q9LJP1]	9	0.0915494	0.0438918	0.154382	0.103137	0	0	0	0	0
29	TBIM000029	Bsv0100-00000029-RA	Protein FAR1-RELATED SEQUENCE 5 [Source:SWISS;Acc:Q9SZL8]	9	0	0	0	0.014585	0	0	0	0	0
30	TBIM000030	Bsv0100-00000030-RA	GDSL esterase/lipase 1 [Source:SWISS;Acc:Q9FLN0]	9	61.7463	62.5483	61.0095	58.4276	57.9494	51.3206	20.6773	31.5606	29.5984
31	TBIM000031	Bsv0100-00000031-RA	GDSL esterase/lipase 4 [Source:SWISS;Acc:Q9LJP1]	9	0.571169	0.471711	1.68085	0.0790201	0.114459	0.186008	0	0	0
32	TBIM000032	Bsv0100-00000032-RA	-	9	0	0	0	0	0	0	0	0	0
33	TBIM000033	Bsv0100-00000033-RA	-	9	0	0	0	0	0	0	0	0	0
34	TBIM000034	Bsv0100-00000034-RA	Probable receptor-like protein kinase At5g24010 [Source:SWISS;Acc:Q9FLW0]	9	0	0	0	0	0	0	0	0	0
35	TBIM000035	Bsv0100-00000035-RA	Receptor-like protein kinase HERK 1 [Source:SWISS;Acc:Q9LX66]	9	0	0	0	0	0	0	0	0	0
36	TBIM000036	Bsv0100-00000036-RA	Receptor-like protein kinase HERK 1 [Source:SWISS;Acc:Q9LX66]	9	0	0	0	0	0	0	0	0	0
37	TBIM000037	Bsv0100-00000037-RA	Receptor-like protein kinase THESEUS 1 [Source:SWISS;Acc:Q9LK35]	9	0	0	0	0	0	0	0	0	0
38	TBIM000038	Bsv0100-00000038-RA	-	9	0	0	0	0	0	0	0	0	0
39	TBIM000039	Bsv0100-00000039-RA	GDSL esterase/lipase At1g54030 [Source:SWISS;Acc:Q7XA74]	9	0	0	0	0	0	0	0	0	0
40	TBIM000040	Bsv0100-00000040-RA	-	9	0	0	0	0	0	0	0	0	0
41	TBIM000041	Bsv0100-00000041-RA	-	9	92.4849	100.851	94.6675	74.4055	92.4814	59.4174	61.6161	57.3222	48.7819
42	TBIM000042	Bsv0100-00000042-RA	Thioredoxin M3, chloroplastic [Source:SWISS;Acc:Q9SEU7]	9	0	0	0	0	0.659844	0	0	0	0
43	TBIM000043	Bsv0100-00000043-RA	ABSCISIC ACID-INSENSITIVE 5-like protein 5 [Source:SWISS;Acc:Q9M7Q4]	9	23.5394	24.3355	34.3243	21.3484	23.0614	27.4989	10.6191	24.3972	29.5432
44	TBIM000044	Bsv0100-00000044-RA	GDSL esterase/lipase 5 [Source:SWISS;Acc:Q9SSA7]	9	0	0	0	0	0	0	0	0	0
45	TBIM000045	Bsv0100-00000045-RA	GDSL esterase/lipase 5 [Source:SWISS;Acc:Q9SSA7]	9	0	0	0	0	0	0	0	0	0
46	TBIM000046	Bsv0100-00000046-RA	UDP-glucose flavonoid 3-O-glucosyltransferase 7 [Source:SWISS;Acc:Q2V6J9]	9	0	0	0	0	0	0	0	0	0
47	TBIM000047	Bsv0100-00000047-RA	Scopoletin glucosyltransferase [Source:SWISS;Acc:Q9AT54]	9	0.161643	0.0735743	0	0.180797	0.0855422	0	0.385681	0	0
48	TBIM000048	Bsv0100-00000048-RA	GDSL esterase/lipase 5 [Source:SWISS;Acc:Q9SSA7]	9	23.6901	25.8038	19.3146	36.7281	31.6018	31.7284	36.4774	41.1246	28.5382
49	TBIM000049	Bsv0100-00000049-RA	GDSL esterase/lipase 5 [Source:SWISS;Acc:Q9SSA7]	9	32.7452	33.9118	22.5966	48.5521	44.2973	53.442	43.0702	44.1829	52.8596
50	TBIM000050	Bsv0100-00000050-RA	-	9	0	0	0	0	0	0	0	0	0
51	TBIM000051	Bsv0100-00000051-RA	-	9	0	0	0	0	0	0	0	0	0
52	TBIM000052	Bsv0100-00000052-RA	Ethylene-responsive transcription factor RAP2-12 [Source:SWISS;Acc:Q9SSA8]	9	170.13	172.616	193.791	166.054	158.524	140.337	204.9	161.337	130.792
53	TBIM000053	Bsv0100-00000053-RA	-	9	0	0	0	0	0	0	0	0	0
54	TBIM000054	Bsv0100-00000054-RA	-	9	0	0	0	0	0	0	0	0	0
55	TBIM000055	Bsv0100-00000055-RA	-	9	0.135332	0.170696	0.128547	0.0255082	0.19606	0.118145	0.116187	0.111491	0.0420488
56	TBIM000056	Bsv0100-00000056-RA	Probable cinnamyl alcohol dehydrogenase 1 [Source:SWISS;Acc:Q9CAI3]	9	2.28571	2.19454	1.751	2.14667	2.39933	1.94183	1.5114	0.628228	0.583816
57	TBIM000057	Bsv0100-00000057-RA	Probable methyltransferase PMT8 [Source:SWISS;Acc:Q940J9]	9	0	0	0	0	0	0	0	0	0
58	TBIM000058	Bsv0100-00000058-RA	-	9	0	0	0	0	0	0	0	0	0
59	TBIM000059	Bsv0100-00000059-RA	-	9	0	0	0	0	0	0	0	0	0
60	TBIM000060	Bsv0100-00000060-RA	-	9	0	0	0	0	0	0	0	0	0
61	TBIM000061	Bsv0100-00000061-RA	-	9	0.520136	0.721006	0.296725	0	0.583796	0	1.14004	0.839283	0.529314
62	TBIM000062	Bsv0100-00000062-RA	-	9	0	0	0	0	0	0	0	0	0
63	TBIM000063	Bsv0100-00000063-RA	Nucleoside diphosphate kinase 1 [Source:SWISS;Acc:O81372]	9	0	0	0	0	0	0	0	0	0
64	TBIM000064	Bsv0100-00000064-RA	-	9	0	0	0	0	0	0	0	0	0
65	TBIM000065	Bsv0100-00000065-RA	-	9	0	0	0	0	0	0	0	0	0
66	TBIM000066	Bsv0100-00000066-RA	HVA22-like protein c [Source:SWISS;Acc:Q9S784]	9	5.62403	6.17312	6.18256	4.07715	3.53155	3.37263	0.998956	1.27308	1.27537
67	TBIM000067	Bsv0100-00000067-RA	-	9	0	0	0	0	0	0	0	0	0
68	TBIM000068	Bsv0100-00000068-RA	Ultraviolet-B receptor UVR8 [Source:SWISS;Acc:Q9FN03]	9	5.32048	5.95508	7.36197	5.00408	5.43337	6.11264	4.59918	6.93759	7.89451
69	TBIM000069	Bsv0100-00000069-RA	-	9	0	0	0.0857517	0	0	0	0	0	0.126684
70	TBIM000070	Bsv0100-00000070-RA	-	9	18.7641	19.7353	24.3316	19.2485	21.5725	23.1857	17.7505	20.6195	19.0649
71	TBIM000071	Bsv0100-00000071-RA	-	9	0	0	0	0	0	0	0	0	0
72	TBIM000072	Bsv0100-00000072-RA	Sphinganine C(4)-monooxygenase 2 [Source:SWISS;Acc:Q9AST3]	9	34.6399	35.6661	32.7852	31.9807	33.4445	31.1413	42.8915	37.4488	31.2488
73	TBIM000073	Bsv0100-00000073-RA	Aspartic proteinase nepenthesin-1 [Source:SWISS;Acc:Q766C3]	9	0	0	0	0	0	0	0	0	0
74	TBIM000074	Bsv0100-00000074-RA	Probable methyltransferase PMT2 [Source:SWISS;Acc:B9DFI7]	9	70.779	73.8746	56.0832	68.1856	67.8529	48.0782	42.6474	26.0113	23.8265
75	TBIM000075	Bsv0100-00000075-RA	NAD-dependent protein deacetylase [Source:SWISS;Acc:Q9KEE5]	9	0	0	0	0	0	0	0	0	0
76	TBIM000076	Bsv0100-00000076-RA	Uncharacterized ABC transporter ATP-binding protein YfmR [Source:SWISS;Acc:O06476]	9	0	0	0	0	0	0	0	0	0
77	TBIM000077	Bsv0100-00000077-RA	Leucine--tRNA ligase [Source:SWISS;Acc:C0ZB13]	9	0	0	0	0	0	0	0	0	0
78	TBIM000078	Bsv0100-00000078-RA	Glutathione import ATP-binding protein GsiA [Source:SWISS;Acc:Q6D3A9]	9	0	0	0	0	0	0	0	0	0
79	TBIM000079	Bsv0100-00000079-RA	Cobalamin import ATP-binding protein BtuD [Source:SWISS;Acc:Q9HQ18]	9	0	0	0	0	0	0	0	0	0
80	TBIM000080	Bsv0100-00000080-RA	Elongation factor 4 [Source:SWISS;Acc:A7GT14]	9	0	0	0	0	0	0	0	0	0
81	TBIM000081	Bsv0100-00000081-RA	Heat-inducible transcription repressor HrcA [Source:SWISS;Acc:C0ZB46]	9	0	0	0	0	0	0	0	0	0
82	TBIM000082	Bsv0100-00000082-RA	Chaperone protein DnaK [Source:SWISS;Acc:Q9LCQ5]	9	0	0	0	0	0	0	0	0	0
83	TBIM000083	Bsv0100-00000083-RA	Histidine triad nucleotide-binding protein 1 [Source:SWISS;Acc:P62958]	9	0	0	0	0	0	0	0	0	0
84	TBIM000084	Bsv0100-00000084-RA	PhoH-like protein [Source:SWISS;Acc:P46343]	9	0	0	0	0	0	0	0	0	0
85	TBIM000085	Bsv0100-00000085-RA	GTPase Era [Source:SWISS;Acc:Q9KD52]	9	0	0	0	0	0	0	0	0	0
86	TBIM000086	Bsv0100-00000086-RA	Glycine--tRNA ligase alpha subunit [Source:SWISS;Acc:C0ZB87]	9	0	0	0	0	0	0	0	0	0
87	TBIM000087	Bsv0100-00000087-RA	Glycine--tRNA ligase beta subunit [Source:SWISS;Acc:Q9KD48]	9	0	0	0	0	0	0	0	0	0
88	TBIM000088	Bsv0100-00000088-RA	Putative pyruvate, phosphate dikinase regulatory protein [Source:SWISS;Acc:Q9KD46]	9	0	0	0	0	0	0	0	0	0
89	TBIM000089	Bsv0100-00000089-RA	RNA polymerase sigma factor SigA [Source:SWISS;Acc:O66381]	9	0	0	0	0	0	0	0	0	0
90	TBIM000090	Bsv0100-00000090-RA	Probable acyl-CoA dehydrogenase YngJ [Source:SWISS;Acc:O34421]	9	0	0	0	0	0	0	0	0	0
91	TBIM000091	Bsv0100-00000091-RA	-	9	0	0	0	0	0	0	0	0	0
92	TBIM000092	Bsv0100-00000092-RA	Probable 4-aminobutyrate aminotransferase [Source:SWISS;Acc:P94427]	9	0	0	0	0	0	0	0	0	0
93	TBIM000093	Bsv0100-00000093-RA	Maltodextrin import ATP-binding protein MsmX [Source:SWISS;Acc:P94360]	9	0	0	0	0	0	0	0	0	0
94	TBIM000094	Bsv0100-00000094-RA	Acetyl-coenzyme A synthetase [Source:SWISS;Acc:P39062]	9	0	0	0	0	0	0	0	0	0
95	TBIM000095	Bsv0100-00000095-RA	Uncharacterized protein YuxK [Source:SWISS;Acc:P40761]	9	0	0	0	0	0	0	0	0	0
96	TBIM000096	Bsv0100-00000096-RA	Arginine utilization regulatory protein RocR [Source:SWISS;Acc:P38022]	9	0	0	0	0	0	0	0	0	0
97	TBIM000097	Bsv0100-00000097-RA	Ornithine aminotransferase [Source:SWISS;Acc:C0ZBR4]	9	0	0	0	0	0	0	0	0	0
98	TBIM000098	Bsv0100-00000098-RA	Putative cation exchanger YfkE [Source:SWISS;Acc:O34840]	9	0	0	0	0	0	0	0	0	0
99	TBIM000099	Bsv0100-00000099-RA	Molybdenum import ATP-binding protein ModC [Source:SWISS;Acc:P45321]	9	0	0	0	0	0	0	0	0	0
100	TBIM000100	Bsv0100-00000100-RA	Probable glycine dehydrogenase [decarboxylating] subunit 2 [Source:SWISS;Acc:C0ZBW7]	9	0	0	0	0	0	0	0	0	0
101	TBIM000101	Bsv0100-00000101-RA	Elongation factor P [Source:SWISS;Acc:C0ZBY1]	9	0	0	0	0	0	0	0	0	0
102	TBIM000102	Bsv0100-00000102-RA	Biotin carboxylase 1 [Source:SWISS;Acc:P49787]	9	0	0	0	0	0	0	0	0	0
103	TBIM000103	Bsv0100-00000103-RA	Bifunctional protein FolD [Source:SWISS;Acc:C0ZC05]	9	0	0	0	0	0	0	0	0	0
104	TBIM000104	Bsv0100-00000104-RA	Farnesyl diphosphate synthase [Source:SWISS;Acc:Q08291]	9	0	0	0	0	0	0	0	0	0
105	TBIM000105	Bsv0100-00000105-RA	1-deoxy-D-xylulose-5-phosphate synthase [Source:SWISS;Acc:C0ZC10]	9	0	0	0	0	0	0	0	0	0
106	TBIM000106	Bsv0100-00000106-RA	Putative rRNA methyltransferase YqxC [Source:SWISS;Acc:P19672]	9	0	0	0	0	0	0	0	0	0
107	TBIM000107	Bsv0100-00000107-RA	Putative sigma L-dependent transcriptional regulator YqiR [Source:SWISS;Acc:P54529]	9	0	0	0	0	0	0	0	0	0
108	TBIM000108	Bsv0100-00000108-RA	2-oxoisovalerate dehydrogenase subunit beta [Source:SWISS;Acc:P37941]	9	0	0	0	0	0	0	0	0	0
109	TBIM000109	Bsv0100-00000109-RA	Oligopeptide transport system permease protein OppC [Source:SWISS;Acc:P24139]	9	0	0	0	0	0	0	0	0	0
110	TBIM000110	Bsv0100-00000110-RA	Glutathione import ATP-binding protein GsiA [Source:SWISS;Acc:Q6D3A9]	9	0	0	0	0	0	0	0	0	0
111	TBIM000111	Bsv0100-00000111-RA	Peptidyl-prolyl cis-trans isomerase B [Source:SWISS;Acc:P35137]	9	0	0	0	0	0	0	0	0	0
112	TBIM000112	Bsv0100-00000112-RA	D-3-phosphoglycerate dehydrogenase [Source:SWISS;Acc:P35136]	9	0	0	0	0	0	0	0	0	0
113	TBIM000113	Bsv0100-00000113-RA	Probable ATP-dependent DNA helicase RecS [Source:SWISS;Acc:P50729]	9	0	0	0	0	0	0	0	0	0
114	TBIM000114	Bsv0100-00000114-RA	Cryptic catabolic NAD-specific glutamate dehydrogenase GudB [Source:SWISS;Acc:P50735]	9	0	0	0	0	0	0	0	0	0
115	TBIM000115	Bsv0100-00000115-RA	GTPase Der [Source:SWISS;Acc:C0ZCB6]	9	0	0	0	0	0	0	0	0	0
116	TBIM000116	Bsv0100-00000116-RA	DNA-binding protein HU [Source:SWISS;Acc:P0A3H0]	9	0	0	0	0	0	0	0	0	0
117	TBIM000117	Bsv0100-00000117-RA	Nucleoside diphosphate kinase [Source:SWISS;Acc:C0ZCD6]	9	0	0	0	0	0	0	0	0	0
118	TBIM000118	Bsv0100-00000118-RA	Chorismate synthase [Source:SWISS;Acc:C0ZCD8]	9	0	0	0	0	0	0	0	0	0
119	TBIM000119	Bsv0100-00000119-RA	Anthranilate synthase component 1 [Source:SWISS;Acc:P14953]	9	0	0	0	0	0	0	0	0	0
120	TBIM000120	Bsv0100-00000120-RA	Anthranilate phosphoribosyltransferase [Source:SWISS;Acc:C0ZCE2]	9	0	0	0	0	0	0	0	0	0
121	TBIM000121	Bsv0100-00000121-RA	N-(5'-phosphoribosyl)anthranilate isomerase [Source:SWISS;Acc:C0ZCE4]	9	0	0	0	0	0	0	0	0	0
122	TBIM000122	Bsv0100-00000122-RA	Tryptophan synthase beta chain [Source:SWISS;Acc:B7GHQ9]	9	0	0	0	0	0	0	0	0	0
123	TBIM000123	Bsv0100-00000123-RA	Menaquinol-cytochrome c reductase cytochrome b subunit [Source:SWISS;Acc:P46912]	9	0	0	0	0	0	0	0	0	0
124	TBIM000124	Bsv0100-00000124-RA	3-methyl-2-oxobutanoate hydroxymethyltransferase [Source:SWISS;Acc:Q3A9L0]	9	0	0	0	0	0	0	0	0	0
125	TBIM000125	Bsv0100-00000125-RA	Pantothenate synthetase [Source:SWISS;Acc:A5D5T5]	9	0	0	0	0	0	0	0	0	0
126	TBIM000126	Bsv0100-00000126-RA	ATP-dependent zinc metalloprotease FtsH [Source:SWISS;Acc:Q9WZ49]	9	0	0	0	0	0	0	0	0	0
127	TBIM000127	Bsv0100-00000127-RA	3-oxoacyl-[acyl-carrier-protein] reductase FabG [Source:SWISS;Acc:P51831]	9	0	0	0	0	0	0	0	0	0
128	TBIM000128	Bsv0100-00000128-RA	Putative acyl-CoA synthetase YngI [Source:SWISS;Acc:O31826]	9	0	0	0	0	0	0	0	0	0
129	TBIM000129	Bsv0100-00000129-RA	3-isopropylmalate dehydratase large subunit [Source:SWISS;Acc:Q5KWJ5]	9	0	0	0	0	0	0	0	0	0
130	TBIM000130	Bsv0100-00000130-RA	Putative amidase C869.01 [Source:SWISS;Acc:Q9URY4]	9	0	0	0	0	0	0	0	0	0
131	TBIM000131	Bsv0100-00000131-RA	Argininosuccinate lyase [Source:SWISS;Acc:A5N6U3]	9	0	0	0	0	0	0	0	0	0
132	TBIM000132	Bsv0100-00000132-RA	Arginine transport ATP-binding protein ArtM [Source:SWISS;Acc:P54537]	9	0	0	0	0	0	0	0	0	0
133	TBIM000133	Bsv0100-00000133-RA	Sulfate/thiosulfate import ATP-binding protein CysA [Source:SWISS;Acc:O31339]	9	0	0	0	0	0	0	0	0	0
134	TBIM000134	Bsv0100-00000134-RA	Uncharacterized ABC transporter ATP-binding protein YkpA [Source:SWISS;Acc:O31716]	9	0	0	0	0	0	0	0	0	0
135	TBIM000135	Bsv0100-00000135-RA	Energy-coupling factor transporter ATP-binding protein EcfA1 [Source:SWISS;Acc:Q8R7Y4]	9	0	0	0	0	0	0	0	0	0
136	TBIM000136	Bsv0100-00000136-RA	Energy-coupling factor transporter ATP-binding protein EcfA2 [Source:SWISS;Acc:A0PXX8]	9	0	0	0	0	0	0	0	0	0
137	TBIM000137	Bsv0100-00000137-RA	Uncharacterized protein YcgM [Source:SWISS;Acc:P76004]	9	0	0	0	0	0	0	0	0	0
138	TBIM000138	Bsv0100-00000138-RA	Oligopeptide transport ATP-binding protein AppD [Source:SWISS;Acc:P42064]	9	0	0	0	0	0	0	0	0	0
139	TBIM000139	Bsv0100-00000139-RA	Oligopeptide transport ATP-binding protein AppF [Source:SWISS;Acc:P42065]	9	0	0	0	0	0	0	0	0	0
140	TBIM000140	Bsv0100-00000140-RA	Uncharacterized HIT-like protein aq_141 [Source:SWISS;Acc:O66536]	9	0	0	0	0	0	0	0	0	0
141	TBIM000141	Bsv0100-00000141-RA	Quinone oxidoreductase PIG3 [Source:SWISS;Acc:Q53FA7]	9	0	0	0	0	0	0	0	0	0
142	TBIM000142	Bsv0100-00000142-RA	Uncharacterized ABC transporter ATP-binding protein YwjA [Source:SWISS;Acc:P45861]	9	0	0	0	0	0	0	0	0	0
143	TBIM000143	Bsv0100-00000143-RA	-	9	0	0	0	0	0	0	0	0	0
144	TBIM000144	Bsv0100-00000144-RA	Oligopeptide transport ATP-binding protein AppD [Source:SWISS;Acc:P42064]	9	0	0	0	0	0	0	0	0	0
145	TBIM000145	Bsv0100-00000145-RA	Probable ATP-dependent helicase YpvA [Source:SWISS;Acc:P50831]	9	0	0	0	0	0	0	0	0	0
146	TBIM000146	Bsv0100-00000146-RA	Signal-transduction and transcriptional-control protein [Source:SWISS;Acc:P26047]	9	0	0	0	0	0	0	0	0	0
147	TBIM000147	Bsv0100-00000147-RA	Uncharacterized oxidoreductase YohF [Source:SWISS;Acc:P33368]	9	0	0	0	0	0	0	0	0	0
148	TBIM000148	Bsv0100-00000148-RA	Succinate-semialdehyde dehydrogenase [NADP(+)] GabD [Source:SWISS;Acc:P25526]	9	0	0	0	0	0	0	0	0	0
149	TBIM000149	Bsv0100-00000149-RA	Glutathione import ATP-binding protein GsiA [Source:SWISS;Acc:Q6D3A9]	9	0	0	0	0	0	0	0	0	0
150	TBIM000150	Bsv0100-00000150-RA	Cytosolic non-specific dipeptidase [Source:SWISS;Acc:Q3ZC84]	9	0	0	0	0	0	0	0	0	0
151	TBIM000151	Bsv0100-00000151-RA	Putative amidohydrolase YhaA [Source:SWISS;Acc:O07598]	9	0	0	0	0	0	0	0	0	0
152	TBIM000152	Bsv0100-00000152-RA	Peptide methionine sulfoxide reductase MsrA/MsrB [Source:SWISS;Acc:Q9KLX6]	9	0	0	0	0	0	0	0	0	0
153	TBIM000153	Bsv0100-00000153-RA	Biotin carboxylase [Source:SWISS;Acc:Q06862]	9	0	0	0	0	0	0	0	0	0
154	TBIM000154	Bsv0100-00000154-RA	Glutamate synthase [NADPH] large chain [Source:SWISS;Acc:P39812]	9	0	0	0	0	0	0	0	0	0
155	TBIM000155	Bsv0100-00000155-RA	Uncharacterized protein in HyuA 5'region [Source:SWISS;Acc:Q01265]	9	0	0	0	0	0	0	0	0	0
156	TBIM000156	Bsv0100-00000156-RA	Pyruvate dehydrogenase E1 component subunit beta [Source:SWISS;Acc:P35488]	9	0	0	0	0	0	0	0	0	0
157	TBIM000157	Bsv0100-00000157-RA	Dihydrolipoyl dehydrogenase [Source:SWISS;Acc:Q9HN74]	9	0	0	0	0	0	0	0	0	0
158	TBIM000158	Bsv0100-00000158-RA	Signal-transduction and transcriptional-control protein [Source:SWISS;Acc:P26047]	9	0	0	0	0	0	0	0	0	0
159	TBIM000159	Bsv0100-00000159-RA	Acetoin:2,6-dichlorophenolindophenol oxidoreductase subunit alpha [Source:SWISS;Acc:O31404]	9	0	0	0	0	0	0	0	0	0
160	TBIM000160	Bsv0100-00000160-RA	Dihydrolipoyllysine-residue acetyltransferase component of acetoin cleaving system [Source:SWISS;Acc:O31550]	9	0	0	0	0	0	0	0	0	0
161	TBIM000161	Bsv0100-00000161-RA	Signal-transduction and transcriptional-control protein [Source:SWISS;Acc:P26047]	9	0	0	0	0	0	0	0	0	0
162	TBIM000162	Bsv0100-00000162-RA	Oligopeptide transport ATP-binding protein AppD [Source:SWISS;Acc:P42064]	9	0	0	0	0	0	0	0	0	0
163	TBIM000163	Bsv0100-00000163-RA	Oligopeptide transport ATP-binding protein AppF [Source:SWISS;Acc:P42065]	9	0	0	0	0	0	0	0	0	0
164	TBIM000164	Bsv0100-00000164-RA	Glutathione import ATP-binding protein GsiA [Source:SWISS;Acc:Q6D3A9]	9	0	0	0	0	0	0	0	0	0
165	TBIM000165	Bsv0100-00000165-RA	Phosphoserine aminotransferase [Source:SWISS;Acc:B1HSU6]	9	0	0	0	0	0	0	0	0	0
166	TBIM000166	Bsv0100-00000166-RA	Dipeptide transport ATP-binding protein DppD [Source:SWISS;Acc:P26905]	9	0	0	0	0	0	0	0	0	0
167	TBIM000167	Bsv0100-00000167-RA	Putative oligopeptide transport ATP-binding protein YkfD [Source:SWISS;Acc:C0SP98]	9	0	0	0	0	0	0	0	0	0
168	TBIM000168	Bsv0100-00000168-RA	Oligopeptide transport ATP-binding protein AppD [Source:SWISS;Acc:P42064]	9	0	0	0	0	0	0	0	0	0
169	TBIM000169	Bsv0100-00000169-RA	Oligopeptide transport ATP-binding protein AppF [Source:SWISS;Acc:P42065]	9	0	0	0	0	0	0	0	0	0
170	TBIM000170	Bsv0100-00000170-RA	-	9	0	0	0	0	0	0	0	0	0
171	TBIM000171	Bsv0100-00000171-RA	NADP-dependent alcohol dehydrogenase C 2 [Source:SWISS;Acc:P0CH37]	9	0	0	0	0	0	0	0	0	0
172	TBIM000172	Bsv0100-00000172-RA	Glutathione import ATP-binding protein GsiA [Source:SWISS;Acc:Q6D3A9]	9	0	0	0	0	0	0	0	0	0
173	TBIM000173	Bsv0100-00000173-RA	Glutathione import ATP-binding protein GsiA [Source:SWISS;Acc:Q6D3A9]	9	0	0	0	0	0	0	0	0	0
174	TBIM000174	Bsv0100-00000174-RA	Cyclic pyranopterin monophosphate synthase [Source:SWISS;Acc:Q8Y870]	9	0	0	0	0	0	0	0	0	0
175	TBIM000175	Bsv0100-00000175-RA	Glycerol kinase [Source:SWISS;Acc:C0Z5A8]	9	0	0	0	0	0	0	0	0	0
176	TBIM000176	Bsv0100-00000176-RA	ATP-dependent zinc metalloprotease FtsH [Source:SWISS;Acc:Q1LLA9]	9	0	0	0	0	0	0	0	0	0
177	TBIM000177	Bsv0100-00000177-RA	Catalase X [Source:SWISS;Acc:P94377]	9	0	0	0	0	0	0	0	0	0
178	TBIM000178	Bsv0100-00000178-RA	Cold shock-like protein CspLB [Source:SWISS;Acc:P0A357]	9	0	0	0	0	0	0	0	0	0
179	TBIM000179	Bsv0100-00000179-RA	Long-chain-fatty-acid--CoA ligase [Source:SWISS;Acc:O07610]	9	0	0	0	0	0	0	0	0	0
180	TBIM000180	Bsv0100-00000180-RA	Probable allantoin permease [Source:SWISS;Acc:P94575]	9	0	0	0	0	0	0	0	0	0
181	TBIM000181	Bsv0100-00000181-RA	N-carbamoylputrescine amidase [Source:SWISS;Acc:Q9XGI9]	9	0	0	0	0	0	0	0	0	0
182	TBIM000182	Bsv0100-00000182-RA	D-hydantoinase [Source:SWISS;Acc:Q45515]	9	0	0	0	0	0	0	0	0	0
183	TBIM000183	Bsv0100-00000183-RA	NAD-dependent dihydropyrimidine dehydrogenase subunit PreA [Source:SWISS;Acc:Q8ZNL7]	9	0	0	0	0	0	0	0	0	0
184	TBIM000184	Bsv0100-00000184-RA	Sulfide dehydrogenase subunit alpha [Source:SWISS;Acc:Q8U195]	9	0	0	0	0	0	0	0	0	0
185	TBIM000185	Bsv0100-00000185-RA	LOG family protein YvdD [Source:SWISS;Acc:O06986]	9	0	0	0	0	0	0	0	0	0
186	TBIM000186	Bsv0100-00000186-RA	Methylmalonate semialdehyde dehydrogenase [acylating] 1 [Source:SWISS;Acc:A4IPB2]	9	0	0	0	0	0	0	0	0	0
187	TBIM000187	Bsv0100-00000187-RA	Ribose import ATP-binding protein RbsA [Source:SWISS;Acc:Q8ENB3]	9	0	0	0	0	0	0	0	0	0
188	TBIM000188	Bsv0100-00000188-RA	DNA topoisomerase 4 subunit B [Source:SWISS;Acc:Q59961]	9	0	0	0	0	0	0	0	0	0
189	TBIM000189	Bsv0100-00000189-RA	Peptidyl-prolyl cis-trans isomerase-like 1 [Source:SWISS;Acc:Q7SF72]	9	0	0	0	0	0	0	0	0	0
190	TBIM000190	Bsv0100-00000190-RA	2-dehydro-3-deoxy-D-gluconate 5-dehydrogenase [Source:SWISS;Acc:P37769]	9	0	0	0	0	0	0	0	0	0
191	TBIM000191	Bsv0100-00000191-RA	None [Source:SWISS;Acc:Q81E85]	9	0	0	0	0	0	0	0	0	0
192	TBIM000192	Bsv0100-00000192-RA	Uncharacterized ABC transporter ATP-binding protein YfmM [Source:SWISS;Acc:O34512]	9	0	0	0	0	0	0	0	0	0
193	TBIM000193	Bsv0100-00000193-RA	Dihydrolipoyl dehydrogenase [Source:SWISS;Acc:P11959]	9	0	0	0	0	0	0	0	0	0
194	TBIM000194	Bsv0100-00000194-RA	Pyruvate dehydrogenase E1 component subunit beta [Source:SWISS;Acc:P21874]	9	0	0	0	0	0	0	0	0	0
195	TBIM000195	Bsv0100-00000195-RA	Pyruvate dehydrogenase E1 component subunit alpha [Source:SWISS;Acc:P21873]	9	0	0	0	0	0	0	0	0	0
196	TBIM000196	Bsv0100-00000196-RA	None [Source:SWISS;Acc:Q9FPH3]	9	0	0	0	0	0	0	0	0	0
197	TBIM000197	Bsv0100-00000197-RA	Uncharacterized protein YnbB [Source:SWISS;Acc:P94479]	9	0	0	0	0	0	0	0	0	0
198	TBIM000198	Bsv0100-00000198-RA	DNA mismatch repair protein MutS [Source:SWISS;Acc:C0ZEZ4]	9	0	0	0	0	0	0	0	0	0
199	TBIM000199	Bsv0100-00000199-RA	Protein RecA [Source:SWISS;Acc:C0ZF14]	9	0	0	0	0	0	0	0	0	0
200	TBIM000200	Bsv0100-00000200-RA	DEAD-box ATP-dependent RNA helicase CshA [Source:SWISS;Acc:Q6HPE6]	9	0	0	0	0	0	0	0	0	0
201	TBIM000201	Bsv0100-00000201-RA	Uncharacterized oxidoreductase YmfI [Source:SWISS;Acc:O31767]	9	0	0	0	0	0	0	0	0	0
202	TBIM000202	Bsv0100-00000202-RA	Uncharacterized ABC transporter ATP-binding protein YufO [Source:SWISS;Acc:O05253]	9	0	0	0	0	0	0	0	0	0
203	TBIM000203	Bsv0100-00000203-RA	DNA translocase FtsK [Source:SWISS;Acc:Q9KA95]	9	0	0	0	0	0	0	0	0	0
204	TBIM000204	Bsv0100-00000204-RA	Aspartate-semialdehyde dehydrogenase [Source:SWISS;Acc:Q04797]	9	0	0	0	0	0	0	0	0	0
205	TBIM000205	Bsv0100-00000205-RA	Uncharacterized zinc protease YmxG [Source:SWISS;Acc:Q04805]	9	0	0	0	0	0	0	0	0	0
206	TBIM000206	Bsv0100-00000206-RA	Polyribonucleotide nucleotidyltransferase [Source:SWISS;Acc:C0ZF43]	9	0	0	0	0	0	0	0	0	0
207	TBIM000207	Bsv0100-00000207-RA	30S ribosomal protein S15 [Source:SWISS;Acc:C0ZF45]	9	0	0	0	0	0	0	0	0	0
208	TBIM000208	Bsv0100-00000208-RA	Translation initiation factor IF-2 [Source:SWISS;Acc:A4IMD7]	9	0	0	0	0	0	0	0	0	0
209	TBIM000209	Bsv0100-00000209-RA	Transcription termination/antitermination protein NusA [Source:SWISS;Acc:Q9KA74]	9	0	0	0	0	0	0	0	0	0
210	TBIM000210	Bsv0100-00000210-RA	1-deoxy-D-xylulose 5-phosphate reductoisomerase [Source:SWISS;Acc:C0ZF60]	9	0	0	0	0	0	0	0	0	0
211	TBIM000211	Bsv0100-00000211-RA	Isoprenyl transferase [Source:SWISS;Acc:O31751]	9	0	0	0	0	0	0	0	0	0
212	TBIM000212	Bsv0100-00000212-RA	Ribosome-recycling factor [Source:SWISS;Acc:C0ZF63]	9	0	0	0	0	0	0	0	0	0
213	TBIM000213	Bsv0100-00000213-RA	Uridylate kinase [Source:SWISS;Acc:Q9KA65]	9	0	0	0	0	0	0	0	0	0
214	TBIM000214	Bsv0100-00000214-RA	30S ribosomal protein S2 [Source:SWISS;Acc:C0ZF66]	9	0	0	0	0	0	0	0	0	0
215	TBIM000215	Bsv0100-00000215-RA	Flagellar motor switch protein FliM [Source:SWISS;Acc:P23453]	9	0	0	0	0	0	0	0	0	0
216	TBIM000216	Bsv0100-00000216-RA	Succinyl-CoA ligase [ADP-forming] subunit alpha [Source:SWISS;Acc:P80865]	9	0	0	0	0	0	0	0	0	0
217	TBIM000217	Bsv0100-00000217-RA	Succinyl-CoA ligase [ADP-forming] subunit beta [Source:SWISS;Acc:C0ZFB3]	9	0	0	0	0	0	0	0	0	0
218	TBIM000218	Bsv0100-00000218-RA	tRNA (guanine-N(1)-)-methyltransferase [Source:SWISS;Acc:C0ZFN1]	9	0	0	0	0	0	0	0	0	0
219	TBIM000219	Bsv0100-00000219-RA	30S ribosomal protein S16 [Source:SWISS;Acc:C0ZFN5]	9	0	0	0	0	0	0	0	0	0
220	TBIM000220	Bsv0100-00000220-RA	Signal recognition particle protein [Source:SWISS;Acc:P37105]	9	0	0	0	0	0	0	0	0	0
221	TBIM000221	Bsv0100-00000221-RA	UPF0122 protein GK1195 [Source:SWISS;Acc:Q5L0Q0]	9	0	0	0	0	0	0	0	0	0
222	TBIM000222	Bsv0100-00000222-RA	Signal recognition particle receptor FtsY [Source:SWISS;Acc:P51835]	9	0	0	0	0	0	0	0	0	0
223	TBIM000223	Bsv0100-00000223-RA	3-oxoacyl-[acyl-carrier-protein] synthase 2 [Source:SWISS;Acc:O34340]	9	0	0	0	0	0	0	0	0	0
224	TBIM000224	Bsv0100-00000224-RA	Acyl carrier protein [Source:SWISS;Acc:C0ZFP2]	9	0	0	0	0	0	0	0	0	0
225	TBIM000225	Bsv0100-00000225-RA	3-oxoacyl-[acyl-carrier-protein] reductase FabG [Source:SWISS;Acc:Q8CPI3]	9	0	0	0	0	0	0	0	0	0
226	TBIM000226	Bsv0100-00000226-RA	3-oxoacyl-[acyl-carrier-protein] synthase 3 [Source:SWISS;Acc:Q24U40]	9	0	0	0	0	0	0	0	0	0
227	TBIM000227	Bsv0100-00000227-RA	Phosphate acyltransferase [Source:SWISS;Acc:C0ZFP6]	9	0	0	0	0	0	0	0	0	0
228	TBIM000228	Bsv0100-00000228-RA	Phosphomethylpyrimidine synthase [Source:SWISS;Acc:Q65M65]	9	0	0	0	0	0	0	0	0	0
229	TBIM000229	Bsv0100-00000229-RA	Uncharacterized oxidoreductase YhdF [Source:SWISS;Acc:O07575]	9	0	0	0	0	0	0	0	0	0
230	TBIM000230	Bsv0100-00000230-RA	ATP-dependent DNA helicase RecG [Source:SWISS;Acc:O34942]	9	0	0	0	0	0	0	0	0	0
231	TBIM000231	Bsv0100-00000231-RA	Arginine transport ATP-binding protein ArtM [Source:SWISS;Acc:P54537]	9	0	0	0	0	0	0	0	0	0
232	TBIM000232	Bsv0100-00000232-RA	Ribulose-phosphate 3-epimerase [Source:SWISS;Acc:O34557]	9	0	0	0	0	0	0	0	0	0
233	TBIM000233	Bsv0100-00000233-RA	Peptide deformylase [Source:SWISS;Acc:A5D1C0]	9	0	0	0	0	0	0	0	0	0
234	TBIM000234	Bsv0100-00000234-RA	Carbamoyl-phosphate synthase large chain [Source:SWISS;Acc:A7GRL1]	9	0	0	0	0	0	0	0	0	0
235	TBIM000235	Bsv0100-00000235-RA	Carbamoyl-phosphate synthase pyrimidine-specific small chain [Source:SWISS;Acc:P52557]	9	0	0	0	0	0	0	0	0	0
236	TBIM000236	Bsv0100-00000236-RA	Probable acyl-activating enzyme 6 [Source:SWISS;Acc:Q9FFE9]	9	0	0	0	0	0	0	0	0	0
237	TBIM000237	Bsv0100-00000237-RA	Isoleucine--tRNA ligase [Source:SWISS;Acc:C0ZG86]	9	0	0	0	0	0	0	0	0	0
238	TBIM000238	Bsv0100-00000238-RA	Cell division protein FtsZ [Source:SWISS;Acc:Q9K9T7]	9	0	0	0	0	0	0	0	0	0
239	TBIM000239	Bsv0100-00000239-RA	UDP-N-acetylglucosamine 1-carboxyvinyltransferase 2 [Source:SWISS;Acc:Q8R9G7]	9	0	0	0	0	0	0	0	0	0
240	TBIM000240	Bsv0100-00000240-RA	Uncharacterized carboxylase YngE [Source:SWISS;Acc:O31825]	9	0	0	0	0	0	0	0	0	0
241	TBIM000241	Bsv0100-00000241-RA	Hydroxymethylglutaryl-CoA lyase YngG [Source:SWISS;Acc:O34873]	9	0	0	0	0	0	0	0	0	0
242	TBIM000242	Bsv0100-00000242-RA	Biotin carboxylase [Source:SWISS;Acc:Q9KDS9]	9	0	0	0	0	0	0	0	0	0
243	TBIM000243	Bsv0100-00000243-RA	3-hydroxypropionyl-coenzyme A dehydratase [Source:SWISS;Acc:A4YI89]	9	0	0	0	0	0	0	0	0	0
244	TBIM000244	Bsv0100-00000244-RA	Uncharacterized protein YlaK [Source:SWISS;Acc:O07635]	9	0	0	0	0	0	0	0	0	0
245	TBIM000245	Bsv0100-00000245-RA	Cystathionine beta-lyase MetC [Source:SWISS;Acc:O31632]	9	0	0	0	0	0	0	0	0	0
246	TBIM000246	Bsv0100-00000246-RA	Hydroperoxy fatty acid reductase gpx1 [Source:SWISS;Acc:P74250]	9	0	0	0	0	0	0	0	0	0
247	TBIM000247	Bsv0100-00000247-RA	GTP-binding protein TypA/BipA homolog [Source:SWISS;Acc:O07631]	9	0	0	0	0	0	0	0	0	0
248	TBIM000248	Bsv0100-00000248-RA	Arginine decarboxylase [Source:SWISS;Acc:Q81MS2]	9	0	0	0	0	0	0	0	0	0
249	TBIM000249	Bsv0100-00000249-RA	Uncharacterized ABC transporter ATP-binding protein TM_0352 [Source:SWISS;Acc:Q9WYI7]	9	0	0	0	0	0	0	0	0	0
250	TBIM000250	Bsv0100-00000250-RA	Uncharacterized ABC transporter ATP-binding protein MJ0412 [Source:SWISS;Acc:Q57855]	9	0	0	0	0	0	0	0	0	0
251	TBIM000251	Bsv0100-00000251-RA	Putative aldehyde dehydrogenase MW2046 [Source:SWISS;Acc:Q8NVG4]	9	0	0	0	0	0	0	0	0	0
252	TBIM000252	Bsv0100-00000252-RA	DNA-binding protein HU 1 [Source:SWISS;Acc:P08821]	9	0	0	0	0	0	0	0	0	0
253	TBIM000253	Bsv0100-00000253-RA	Transcriptional regulatory protein TyrR [Source:SWISS;Acc:Q9ZIB7]	9	0	0	0	0	0	0	0	0	0
254	TBIM000254	Bsv0100-00000254-RA	Methionine gamma-lyase [Source:SWISS;Acc:P13254]	9	0	0	0	0	0	0	0	0	0
255	TBIM000255	Bsv0100-00000255-RA	Glutathione import ATP-binding protein GsiA [Source:SWISS;Acc:Q6D3A9]	9	0	0	0	0	0	0	0	0	0
256	TBIM000256	Bsv0100-00000256-RA	Signal-transduction and transcriptional-control protein [Source:SWISS;Acc:P26047]	9	0	0	0	0	0	0	0	0	0
257	TBIM000257	Bsv0100-00000257-RA	Uncharacterized membrane protein YjbE [Source:SWISS;Acc:O31603]	9	0	0	0	0	0	0	0	0	0
258	TBIM000258	Bsv0100-00000258-RA	5'-nucleotidase SurE [Source:SWISS;Acc:C0ZGV3]	9	0	0	0	0	0	0	0	0	0
259	TBIM000259	Bsv0100-00000259-RA	Methionine aminopeptidase [Source:SWISS;Acc:P50614]	9	0	0	0	0	0	0	0	0	0
260	TBIM000260	Bsv0100-00000260-RA	Betaine aldehyde dehydrogenase [Source:SWISS;Acc:P71016]	9	0	0	0	0	0	0	0	0	0
261	TBIM000261	Bsv0100-00000261-RA	Oligopeptide transport ATP-binding protein AppF [Source:SWISS;Acc:P42065]	9	0	0	0	0	0	0	0	0	0
262	TBIM000262	Bsv0100-00000262-RA	Oligopeptide transport ATP-binding protein OppD [Source:SWISS;Acc:P24136]	9	0	0	0	0	0	0	0	0	0
263	TBIM000263	Bsv0100-00000263-RA	Signal-transduction and transcriptional-control protein [Source:SWISS;Acc:P26047]	9	0	0	0	0	0	0	0	0	0
264	TBIM000264	Bsv0100-00000264-RA	Pyruvate carboxylase [Source:SWISS;Acc:Q9KWU4]	9	0	0	0	0	0	0	0	0	0
265	TBIM000265	Bsv0100-00000265-RA	Uncharacterized membrane protein YjbE [Source:SWISS;Acc:O31603]	9	0	0	0	0	0	0	0	0	0
266	TBIM000266	Bsv0100-00000266-RA	-	9	0	0	0	0	0	0	0	0	0
267	TBIM000267	Bsv0100-00000267-RA	Uncharacterized protein AF_2225 [Source:SWISS;Acc:O28058]	9	0	0	0	0	0	0	0	0	0
268	TBIM000268	Bsv0100-00000268-RA	Putative cysteine desulfurase IscS 2 [Source:SWISS;Acc:O34874]	9	0	0	0	0	0	0	0	0	0
269	TBIM000269	Bsv0100-00000269-RA	Diaminopimelate epimerase [Source:SWISS;Acc:A3DK16]	9	0	0	0	0	0	0	0	0	0
270	TBIM000270	Bsv0100-00000270-RA	30S ribosomal protein S4 [Source:SWISS;Acc:C0ZHK9]	9	0	0	0	0	0	0	0	0	0
271	TBIM000271	Bsv0100-00000271-RA	2-aminoadipate transaminase [Source:SWISS;Acc:Q72LL6]	9	0	0	0	0	0	0	0	0	0
272	TBIM000272	Bsv0100-00000272-RA	Cyclic pyranopterin monophosphate synthase accessory protein [Source:SWISS;Acc:C0ZHP0]	9	0	0	0	0	0	0	0	0	0
273	TBIM000273	Bsv0100-00000273-RA	Multidrug resistance ABC transporter ATP-binding/permease protein BmrA [Source:SWISS;Acc:O06967]	9	0	0	0	0	0	0	0	0	0
274	TBIM000274	Bsv0100-00000274-RA	Aconitate hydratase [Source:SWISS;Acc:Q5HPJ0]	9	0	0	0	0	0	0	0	0	0
275	TBIM000275	Bsv0100-00000275-RA	Uncharacterized oxidoreductase YtbE [Source:SWISS;Acc:O34678]	9	0	0	0	0	0	0	0	0	0
276	TBIM000276	Bsv0100-00000276-RA	Uncharacterized sigma-54-dependent transcriptional regulator YgeV [Source:SWISS;Acc:Q46802]	9	0	0	0	0	0	0	0	0	0
277	TBIM000277	Bsv0100-00000277-RA	GDP-L-fucose synthase [Source:SWISS;Acc:P32055]	9	0	0	0	0	0	0	0	0	0
278	TBIM000278	Bsv0100-00000278-RA	GDP-mannose 4,6-dehydratase [Source:SWISS;Acc:O85713]	9	0	0	0	0	0	0	0	0	0
279	TBIM000279	Bsv0100-00000279-RA	UDP-glucose 6-dehydrogenase YwqF [Source:SWISS;Acc:P96718]	9	0	0	0	0	0	0	0	0	0
280	TBIM000280	Bsv0100-00000280-RA	UTP--glucose-1-phosphate uridylyltransferase [Source:SWISS;Acc:Q05852]	9	0	0	0	0	0	0	0	0	0
281	TBIM000281	Bsv0100-00000281-RA	DNA translocase SftA [Source:SWISS;Acc:C0SP86]	9	0	0	0	0	0	0	0	0	0
282	TBIM000282	Bsv0100-00000282-RA	Probable adenylyl-sulfate kinase [Source:SWISS;Acc:Q9KCT0]	9	0	0	0	0	0	0	0	0	0
283	TBIM000283	Bsv0100-00000283-RA	Uroporphyrinogen-III C-methyltransferase [Source:SWISS;Acc:P42437]	9	0	0	0	0	0	0	0	0	0
284	TBIM000284	Bsv0100-00000284-RA	Dihydroxy-acid dehydratase [Source:SWISS;Acc:Q5KYA5]	9	0	0	0	0	0	0	0	0	0
285	TBIM000285	Bsv0100-00000285-RA	Transketolase [Source:SWISS;Acc:Q9KAD7]	9	0	0	0	0	0	0	0	0	0
286	TBIM000286	Bsv0100-00000286-RA	Uncharacterized ABC transporter ATP-binding protein YdiF [Source:SWISS;Acc:O05519]	9	0	0	0	0	0	0	0	0	0
287	TBIM000287	Bsv0100-00000287-RA	L-cystine import ATP-binding protein TcyC [Source:SWISS;Acc:P39456]	9	0	0	0	0	0	0	0	0	0
288	TBIM000288	Bsv0100-00000288-RA	DEAD-box ATP-dependent RNA helicase CshA [Source:SWISS;Acc:Q5L3G9]	9	0	0	0	0	0	0	0	0	0
289	TBIM000289	Bsv0100-00000289-RA	3-oxoacyl-[acyl-carrier-protein] synthase 2 [Source:SWISS;Acc:P73283]	9	0	0	0	0	0	0	0	0	0
290	TBIM000290	Bsv0100-00000290-RA	Putative amidohydrolase YhaA [Source:SWISS;Acc:O07598]	9	0	0	0	0	0	0	0	0	0
291	TBIM000291	Bsv0100-00000291-RA	Dihydrofolate reductase [Source:SWISS;Acc:P0C0P1]	9	0	0	0	0	0	0	0	0	0
292	TBIM000292	Bsv0100-00000292-RA	Thymidylate synthase [Source:SWISS;Acc:C0ZI91]	9	0	0	0	0	0	0	0	0	0
293	TBIM000293	Bsv0100-00000293-RA	Cold shock protein CspB [Source:SWISS;Acc:P42016]	9	0	0	0	0	0	0	0	0	0
294	TBIM000294	Bsv0100-00000294-RA	Spermidine/putrescine import ATP-binding protein PotA [Source:SWISS;Acc:Q6HLQ9]	9	0	0	0	0	0	0	0	0	0
295	TBIM000295	Bsv0100-00000295-RA	ATP-dependent Clp protease ATP-binding subunit ClpE [Source:SWISS;Acc:O31673]	9	0	0	0	0	0	0	0	0	0
296	TBIM000296	Bsv0100-00000296-RA	Ribose import ATP-binding protein RbsA [Source:SWISS;Acc:Q5KUX3]	9	0	0	0	0	0	0	0	0	0
297	TBIM000297	Bsv0100-00000297-RA	Sulfate/thiosulfate import ATP-binding protein CysA 2 [Source:SWISS;Acc:Q7NWX3]	9	0	0	0	0	0	0	0	0	0
298	TBIM000298	Bsv0100-00000298-RA	Putative aldehyde dehydrogenase DhaS [Source:SWISS;Acc:O34660]	9	0	0	0	0	0	0	0	0	0
299	TBIM000299	Bsv0100-00000299-RA	Spermidine/putrescine import ATP-binding protein PotA [Source:SWISS;Acc:A1TAI4]	9	0	0	0	0	0	0	0	0	0
300	TBIM000300	Bsv0100-00000300-RA	Probable aldehyde dehydrogenase YcbD [Source:SWISS;Acc:P42236]	9	0	0	0	0	0	0	0	0	0
301	TBIM000301	Bsv0100-00000301-RA	Acetoacetate metabolism regulatory protein AtoC [Source:SWISS;Acc:Q06065]	9	0	0	0	0	0	0	0	0	0
302	TBIM000302	Bsv0100-00000302-RA	-	9	0	0	0	0	0	0	0	0	0
303	TBIM000303	Bsv0100-00000303-RA	Sulfate/thiosulfate import ATP-binding protein CysA 2 [Source:SWISS;Acc:Q7NWX3]	9	0	0	0	0	0	0	0	0	0
304	TBIM000304	Bsv0100-00000304-RA	Lysine-specific histone demethylase 1 homolog 2 [Source:SWISS;Acc:Q9LID0]	9	0	0	0	0	0	0	0	0	0
305	TBIM000305	Bsv0100-00000305-RA	Uncharacterized oxidoreductase YkwC [Source:SWISS;Acc:O34948]	9	0	0	0	0	0	0	0	0	0
306	TBIM000306	Bsv0100-00000306-RA	Aldehyde dehydrogenase, thermostable [Source:SWISS;Acc:P42329]	9	0	0	0	0	0	0	0	0	0
307	TBIM000307	Bsv0100-00000307-RA	Probable amino-acid ABC transporter ATP-binding protein y4tH [Source:SWISS;Acc:P55662]	9	0	0	0	0	0	0	0	0	0
308	TBIM000308	Bsv0100-00000308-RA	Probable serine racemase [Source:SWISS;Acc:Q54HH2]	9	0	0	0	0	0	0	0	0	0
309	TBIM000309	Bsv0100-00000309-RA	3-hydroxyacyl-CoA dehydrogenase type-2 [Source:SWISS;Acc:O02691]	9	0	0	0	0	0	0	0	0	0
310	TBIM000310	Bsv0100-00000310-RA	Uncharacterized ABC transporter ATP-binding protein Mb1312c [Source:SWISS;Acc:P63396]	9	0	0	0	0	0	0	0	0	0
311	TBIM000311	Bsv0100-00000311-RA	Putative sigma L-dependent transcriptional regulator YqiR [Source:SWISS;Acc:P54529]	9	0	0	0	0	0	0	0	0	0
312	TBIM000312	Bsv0100-00000312-RA	Fumarylacetoacetate hydrolase domain-containing protein 2 [Source:SWISS;Acc:Q6GLT8]	9	0	0	0	0	0	0	0	0	0
313	TBIM000313	Bsv0100-00000313-RA	-	9	0	0	0	0	0	0	0	0	0
314	TBIM000314	Bsv0100-00000314-RA	Betaine aldehyde dehydrogenase [Source:SWISS;Acc:P71016]	9	0	0	0	0	0	0	0	0	0
315	TBIM000315	Bsv0100-00000315-RA	Long-chain-fatty-acid--CoA ligase [Source:SWISS;Acc:O07610]	9	0	0	0	0	0	0	0	0	0
316	TBIM000316	Bsv0100-00000316-RA	Caffeine dehydrogenase subunit alpha [Source:SWISS;Acc:D7REY3]	9	0	0	0	0	0	0	0	0	0
317	TBIM000317	Bsv0100-00000317-RA	2-succinylbenzoate--CoA ligase [Source:SWISS;Acc:Q72YK9]	9	0	0	0	0	0	0	0	0	0
318	TBIM000318	Bsv0100-00000318-RA	Alcohol dehydrogenase [Source:SWISS;Acc:P42327]	9	0	0	0	0	0	0	0	0	0
319	TBIM000319	Bsv0100-00000319-RA	Acetoacetate metabolism regulatory protein AtoC [Source:SWISS;Acc:Q06065]	9	0	0	0	0	0	0	0	0	0
320	TBIM000320	Bsv0100-00000320-RA	Uncharacterized membrane protein YjbE [Source:SWISS;Acc:O31603]	9	0	0	0	0	0	0	0	0	0
321	TBIM000321	Bsv0100-00000321-RA	Glutathione import ATP-binding protein GsiA [Source:SWISS;Acc:Q6D3A9]	9	0	0	0	0	0	0	0	0	0
322	TBIM000322	Bsv0100-00000322-RA	Long-chain-fatty-acid--CoA ligase [Source:SWISS;Acc:O07610]	9	0	0	0	0	0	0	0	0	0
323	TBIM000323	Bsv0100-00000323-RA	Putative sigma L-dependent transcriptional regulator YqiR [Source:SWISS;Acc:P54529]	9	0	0	0	0	0	0	0	0	0
324	TBIM000324	Bsv0100-00000324-RA	Putative oligopeptide transport ATP-binding protein YkfD [Source:SWISS;Acc:C0SP98]	9	0	0	0	0	0	0	0	0	0
325	TBIM000325	Bsv0100-00000325-RA	Oligopeptide transport ATP-binding protein OppD [Source:SWISS;Acc:P24136]	9	0	0	0	0	0	0	0	0	0
326	TBIM000326	Bsv0100-00000326-RA	Uncharacterized protein in HyuA 5'region [Source:SWISS;Acc:Q01265]	9	0	0	0	0	0	0	0	0	0
327	TBIM000327	Bsv0100-00000327-RA	Betaine aldehyde dehydrogenase [Source:SWISS;Acc:P71016]	9	0	0	0	0	0	0	0	0	0
328	TBIM000328	Bsv0100-00000328-RA	Guanidinobutyrase [Source:SWISS;Acc:Q8KZT5]	9	0	0	0	0	0	0	0	0	0
329	TBIM000329	Bsv0100-00000329-RA	Lactaldehyde dehydrogenase [Source:SWISS;Acc:A6UVT6]	9	0	0	0	0	0	0	0	0	0
330	TBIM000330	Bsv0100-00000330-RA	Glycine betaine/carnitine/choline transport ATP-binding protein OpuCA [Source:SWISS;Acc:O34992]	9	0	0	0	0	0	0	0	0	0
331	TBIM000331	Bsv0100-00000331-RA	3-ketoacyl-CoA thiolase, mitochondrial [Source:SWISS;Acc:Q8BWT1]	9	0	0	0	0	0	0	0	0	0
332	TBIM000332	Bsv0100-00000332-RA	Glutathione import ATP-binding protein GsiA [Source:SWISS;Acc:Q6D3A9]	9	0	0	0	0	0	0	0	0	0
333	TBIM000333	Bsv0100-00000333-RA	UPF0261 protein CTC_01794 [Source:SWISS;Acc:Q893M2]	9	0	0	0	0	0	0	0	0	0
334	TBIM000334	Bsv0100-00000334-RA	Uncharacterized membrane protein YuiD [Source:SWISS;Acc:O32107]	9	0	0	0	0	0	0	0	0	0
335	TBIM000335	Bsv0100-00000335-RA	Uncharacterized protein YutM [Source:SWISS;Acc:O32113]	9	0	0	0	0	0	0	0	0	0
336	TBIM000336	Bsv0100-00000336-RA	O-acetylserine dependent cystathionine beta-synthase [Source:SWISS;Acc:O05393]	9	0	0	0	0	0	0	0	0	0
337	TBIM000337	Bsv0100-00000337-RA	Glyoxylate reductase [Source:SWISS;Acc:Q8U3Y2]	9	0	0	0	0	0	0	0	0	0
338	TBIM000338	Bsv0100-00000338-RA	Lipoyl synthase [Source:SWISS;Acc:Q9K7C9]	9	0	0	0	0	0	0	0	0	0
339	TBIM000339	Bsv0100-00000339-RA	Riboflavin biosynthesis protein RibBA [Source:SWISS;Acc:C0ZKW2]	9	0	0	0	0	0	0	0	0	0
340	TBIM000340	Bsv0100-00000340-RA	Riboflavin biosynthesis protein RibD [Source:SWISS;Acc:P17618]	9	0	0	0	0	0	0	0	0	0
341	TBIM000341	Bsv0100-00000341-RA	Divalent metal cation transporter MntH [Source:SWISS;Acc:Q8ZSB0]	9	0	0	0	0	0	0	0	0	0
342	TBIM000342	Bsv0100-00000342-RA	-	9	2.18108	1.79786	2.12739	2.05236	1.55987	1.80307	1.67397	2.09184	1.76832
343	TBIM000343	Bsv0100-00000343-RA	-	9	0	0	0	0	0	0	0	0	0
344	TBIM000344	Bsv0100-00000344-RA	Dihydroflavonol-4-reductase [Source:SWISS;Acc:P51110]	9	2.78052	2.8909	4.05789	3.83679	2.55003	1.50916	0.648622	0.524631	0.369668
345	TBIM000345	Bsv0100-00000345-RA	-	9	0	0	0	0	0	0	0	0	0
346	TBIM000346	Bsv0100-00000346-RA	-	9	0	0	0	0	0	0	0	0	0
347	TBIM000347	Bsv0100-00000347-RA	Cinnamoyl-CoA reductase 2 [Source:SWISS;Acc:Q9SAH9]	9	10.7094	10.2996	12.969	9.8848	9.69125	10.9734	11.7517	18.3408	18.2402
348	TBIM000348	Bsv0100-00000348-RA	RNA-binding protein 24-B [Source:SWISS;Acc:Q9I8B3]	9	9.76704	8.65673	11.0162	8.85799	8.55031	7.59048	7.90401	7.01205	6.88659
349	TBIM000349	Bsv0100-00000349-RA	SWI/SNF complex subunit SWI3B [Source:SWISS;Acc:Q84JG2]	9	13.8189	12.9497	17.0988	12.2452	14.4003	16.2363	11.4081	11.2719	9.48281
350	TBIM000350	Bsv0100-00000350-RA	PsbP domain-containing protein 3, chloroplastic [Source:SWISS;Acc:Q9S720]	9	40.0573	38.4978	18.3277	48.1653	45.7865	38.9173	112.288	73.2402	62.4634
351	TBIM000351	Bsv0100-00000351-RA	-	9	29.3052	28.2442	27.7732	17.7531	19.981	16.6827	11.6524	8.57432	9.12443
352	TBIM000352	Bsv0100-00000352-RA	Short-chain dehydrogenase/reductase family 42E member 1 [Source:SWISS;Acc:Q9D665]	9	0.940969	1.16632	0.0465532	0.0454611	0.176717	0.161136	0	0	0
353	TBIM000353	Bsv0100-00000353-RA	Short-chain dehydrogenase/reductase family 42E member 1 [Source:SWISS;Acc:Q32L94]	9	16.1888	16.0137	19.6825	17.6156	15.5743	15.9488	16.7564	18.7236	14.7589
354	TBIM000354	Bsv0100-00000354-RA	-	9	0	0	0.27085	0	0	0	0	0	0
355	TBIM000355	Bsv0100-00000355-RA	-	9	0	0	0	0	0	0	0	0	0
356	TBIM000356	Bsv0100-00000356-RA	-	9	21.1161	22.4004	20.2577	17.1319	14.5066	11.3683	10.9104	6.99223	6.70171
357	TBIM000357	Bsv0100-00000357-RA	Probable inorganic phosphate transporter 1-9 [Source:SWISS;Acc:Q9S735]	9	0	0.125108	0	0.146973	0.140496	0	0.931313	0.131475	0.222282
358	TBIM000358	Bsv0100-00000358-RA	Probable inorganic phosphate transporter 1-9 [Source:SWISS;Acc:Q9S735]	9	0	0.267404	0.0787845	0.158738	0	0	0.368181	0.0705632	0
359	TBIM000359	Bsv0100-00000359-RA	Xylem cysteine proteinase 2 [Source:SWISS;Acc:Q9LM66]	9	36.0312	33.3267	28.4284	36.8605	38.2533	33.4788	10.4074	17.4937	16.8748
360	TBIM000360	Bsv0100-00000360-RA	30S ribosomal protein S2, chloroplastic [Source:SWISS;Acc:Q49L09]	9	0	0	0	0	0	0	0	0	0
361	TBIM000361	Bsv0100-00000361-RA	Protein CUP-SHAPED COTYLEDON 3 [Source:SWISS;Acc:Q9S851]	9	2.30765	2.36	3.5476	0.389976	0.422787	0.0631644	0	0	0
362	TBIM000362	Bsv0100-00000362-RA	-	9	0	0	0	0	0	0	0	0	0
363	TBIM000363	Bsv0100-00000363-RA	-	9	0	0	0	0	0	0	0	0	0
364	TBIM000364	Bsv0100-00000364-RA	Protein FAR-RED ELONGATED HYPOCOTYL 3 [Source:SWISS;Acc:Q9LIE5]	9	0	0	0	0	0	0	0	0	0
365	TBIM000365	Bsv0100-00000365-RA	-	9	5.42167	4.79902	5.88617	2.48156	3.14003	2.24994	1.20279	1.20118	0.589386
366	TBIM000366	Bsv0100-00000366-RA	-	9	0	0	0	0	0	0	0	0	0
367	TBIM000367	Bsv0100-00000367-RA	-	9	0	0	0	0	0	0	0	0	0
368	TBIM000368	Bsv0100-00000368-RA	-	9	0	0	0	0	0	0	0	0	0
369	TBIM000369	Bsv0100-00000369-RA	Monosaccharide-sensing protein 1 [Source:SWISS;Acc:Q96290]	9	0	0	0	0	0	0.109827	0	0.207963	0.287695
370	TBIM000370	Bsv0100-00000370-RA	-	9	0	0	0	0	0	0	0	0	0
371	TBIM000371	Bsv0100-00000371-RA	-	9	0	0	0	0	0	0	0	0	0
372	TBIM000372	Bsv0100-00000372-RA	Monosaccharide-sensing protein 2 [Source:SWISS;Acc:Q8LPQ8]	9	3.9751	3.09967	3.83615	3.41008	3.14786	2.34791	0.563303	0.40769	0.619223
373	TBIM000373	Bsv0100-00000373-RA	-	9	45.8092	50.6351	40.9317	52.998	49.3865	54.7392	74.5298	72.5856	59.982
374	TBIM000374	Bsv0100-00000374-RA	-	9	0	0	0	0	0	0	0	0	0
375	TBIM000375	Bsv0100-00000375-RA	-	9	0	0	0	0	0	0	0	0	0
376	TBIM000376	Bsv0100-00000376-RA	-	9	0	0	0	0	0	0	0	0	0
377	TBIM000377	Bsv0100-00000377-RA	-	9	0	0	0	0	0	0	0	0	0
378	TBIM000378	Bsv0100-00000378-RA	Peptidyl-prolyl cis-trans isomerase FKBP18, chloroplastic [Source:SWISS;Acc:Q9LM71]	9	24.8917	24.9888	22.8045	27.0065	27.4297	36.4614	46.6966	43.8894	37.2046
379	TBIM000379	Bsv0100-00000379-RA	-	9	0	0	0	0	0	0	0	0	0
380	TBIM000380	Bsv0100-00000380-RA	-	9	0	0	0	0	0	0	0	0	0
381	TBIM000381	Bsv0100-00000381-RA	-	9	0	0	0	0	0	0	0	0	0
382	TBIM000382	Bsv0100-00000382-RA	RING-H2 finger protein ATL8 [Source:SWISS;Acc:Q8LC69]	9	20.3695	19.0424	24.0629	15.7514	18.9933	17.5133	11.3818	11.4857	10.6939
383	TBIM000383	Bsv0100-00000383-RA	-	9	0	0	0	0	0	0	0	0	0
384	TBIM000384	Bsv0100-00000384-RA	Outer envelope pore protein 21B, chloroplastic [Source:SWISS;Acc:Q9FPG2]	9	74.4281	76.8589	73.8328	77.4501	74.0274	88.7522	51.0888	61.7126	43.772
385	TBIM000385	Bsv0100-00000385-RA	Dolichyl-diphosphooligosaccharide--protein glycosyltransferase subunit 1A [Source:SWISS;Acc:Q9SFX3]	9	45.2853	46.2942	44.9264	37.5264	36.823	28.4297	11.5105	12.9007	11.5441
386	TBIM000386	Bsv0100-00000386-RA	-	9	0	0	0	0	0	0	0	0	0
387	TBIM000387	Bsv0100-00000387-RA	MLO-like protein 5 [Source:SWISS;Acc:O22815]	9	0.492046	0.633266	0.699162	0.407511	0.210815	0.397368	0.0289756	0.054142	0.0906634
388	TBIM000388	Bsv0100-00000388-RA	Protein S-acyltransferase 21 [Source:SWISS;Acc:Q6DR03]	9	11.9202	14.0682	16.8525	9.31763	9.32472	9.54427	2.81441	3.47072	2.92036
389	TBIM000389	Bsv0100-00000389-RA	-	9	0	0	0	0	0	0	0	0	0
390	TBIM000390	Bsv0100-00000390-RA	-	9	0	0	0	0	0	0	0	0	0
391	TBIM000391	Bsv0100-00000391-RA	-	9	274.519	282.548	242.223	282.718	272.592	225.566	235.655	196.01	174.002
392	TBIM000392	Bsv0100-00000392-RA	Glyceraldehyde-3-phosphate dehydrogenase B, chloroplastic [Source:SWISS;Acc:P12860]	9	685.125	719.492	531.855	929.157	844.408	919.603	1438.18	1209.82	1033.9
393	TBIM000393	Bsv0100-00000393-RA	Wall-associated receptor kinase 4 [Source:SWISS;Acc:Q9LMN6]	9	0	0	0	0	0	0	0	0	0
394	TBIM000394	Bsv0100-00000394-RA	Wall-associated receptor kinase 1 [Source:SWISS;Acc:Q39191]	9	0	0	0	0	0	0	0	0	0
395	TBIM000395	Bsv0100-00000395-RA	-	9	0	0	0	0	0	0	0	0	0
396	TBIM000396	Bsv0100-00000396-RA	Wall-associated receptor kinase-like 2 [Source:SWISS;Acc:Q7X8C5]	9	0.5944	0.479924	0.459734	0.53084	0.473201	0.390236	0	0.0986481	0.167979
397	TBIM000397	Bsv0100-00000397-RA	High affinity nitrate transporter 2.5 [Source:SWISS;Acc:Q9LPV5]	9	0	0	0	0	0	0	0	0	0
398	TBIM000398	Bsv0100-00000398-RA	Wall-associated receptor kinase 1 [Source:SWISS;Acc:Q39191]	9	0	0	0	0	0	0	0	0	0
399	TBIM000399	Bsv0100-00000399-RA	Wall-associated receptor kinase 2 [Source:SWISS;Acc:Q9LMP1]	9	0.344489	0.238226	0.36967	0.399682	0.244189	0.29163	0.763355	0.612771	0.85015
400	TBIM000400	Bsv0100-00000400-RA	Wall-associated receptor kinase-like 22 [Source:SWISS;Acc:Q8RY17]	9	0	0	0	0	0	0	0	0	0
401	TBIM000401	Bsv0100-00000401-RA	-	9	0	0	0	0	0	0	0	0	0
402	TBIM000402	Bsv0100-00000402-RA	-	9	0	0	0	0	0	0	0	0	0
403	TBIM000403	Bsv0100-00000403-RA	Wall-associated receptor kinase-like 2 [Source:SWISS;Acc:Q7X8C5]	9	0.0335123	0.0977642	0.0777273	0.695078	0.521301	0.0883803	5.44003	2.2148	1.89793
404	TBIM000404	Bsv0100-00000404-RA	Uncharacterized FCP1 homology domain-containing protein C1271.03c [Source:SWISS;Acc:O94336]	9	25.7592	26.141	19.0161	24.7189	23.6536	23.68	22.0072	22.4162	20.4016
405	TBIM000405	Bsv0100-00000405-RA	-	9	0	1.07397	0	4.10016	8.83675	1.49235	36.2123	1.1889	0
406	TBIM000406	Bsv0100-00000406-RA	Wall-associated receptor kinase 5 [Source:SWISS;Acc:Q9LMN7]	9	5.32294	4.55882	6.58159	7.02697	6.80529	2.98031	1.79852	1.82203	1.75091
407	TBIM000407	Bsv0100-00000407-RA	Wall-associated receptor kinase 2 [Source:SWISS;Acc:Q9LMP1]	9	0	0	0.284143	0	0	0	0	0	0.112627
408	TBIM000408	Bsv0100-00000408-RA	Wall-associated receptor kinase 3 [Source:SWISS;Acc:Q9LMN8]	9	0.34732	0	0.641138	0	0	0	0	0	0
409	TBIM000409	Bsv0100-00000409-RA	Wall-associated receptor kinase 1 [Source:SWISS;Acc:Q39191]	9	0	0	0	0	0	0	0	0	0
410	TBIM000410	Bsv0100-00000410-RA	Wall-associated receptor kinase 5 [Source:SWISS;Acc:Q9LMN7]	9	0	0	0	0	0	0	0	0	0
411	TBIM000411	Bsv0100-00000411-RA	-	9	0	0	0	0	0	0	0	0	0
412	TBIM000412	Bsv0100-00000412-RA	-	9	0	0	0	0	0	0	0	0	0
413	TBIM000413	Bsv0100-00000413-RA	-	9	0	0	0	0	0	0	0	0	0
414	TBIM000414	Bsv0100-00000414-RA	Wall-associated receptor kinase 3 [Source:SWISS;Acc:Q9LMN8]	9	1.69409	1.90611	3.8669	1.68421	1.92244	0.774452	0.108395	0.345562	0.285134
415	TBIM000415	Bsv0100-00000415-RA	Acidic endochitinase SP2 [Source:SWISS;Acc:P42820]	9	0.544758	0.457812	1.49269	0.543028	0.52173	0.314303	0.948184	0.770656	0.738118
416	TBIM000416	Bsv0100-00000416-RA	Acidic endochitinase SP2 [Source:SWISS;Acc:P42820]	9	1.08767	1.06829	1.64852	0.798102	1.09574	4.07794	57.0477	29.252	23.9248
417	TBIM000417	Bsv0100-00000417-RA	Acidic endochitinase SP2 [Source:SWISS;Acc:P42820]	9	0.206116	0.0480415	0.454365	0.168288	0.0543244	0.265323	4.43169	2.71231	1.97095
418	TBIM000418	Bsv0100-00000418-RA	Signal recognition particle 14 kDa protein [Source:SWISS;Acc:O04421]	9	34.7706	36.1189	32.8695	26.0312	26.6631	28.0205	19.604	17.4079	14.2506
419	TBIM000419	Bsv0100-00000419-RA	Trigger factor [Source:SWISS;Acc:B7JW76]	9	24.968	26.2058	27.8497	31.0161	31.5277	39.6381	29.1101	35.4635	25.8744
420	TBIM000420	Bsv0100-00000420-RA	-	9	11.9583	13.1597	8.226	12.524	10.1668	11.1208	12.7807	8.21204	5.99464
421	TBIM000421	Bsv0100-00000421-RA	DNA polymerase I [Source:SWISS;Acc:P52026]	9	2.23455	1.96113	2.67963	2.15971	1.89447	2.25591	1.9074	2.19531	1.71152
422	TBIM000422	Bsv0100-00000422-RA	DNA polymerase I [Source:SWISS;Acc:P43741]	9	0	0	0	0	0	0	0	0	0
423	TBIM000423	Bsv0100-00000423-RA	-	9	10.9931	10.5874	8.35594	7.79288	9.66131	8.16688	7.20127	6.39543	7.43008
424	TBIM000424	Bsv0100-00000424-RA	-	9	17.5105	17.968	15.9084	9.92321	10.935	11.1397	4.06187	4.8427	3.88325
425	TBIM000425	Bsv0100-00000425-RA	Inosine-5'-monophosphate dehydrogenase 2 [Source:SWISS;Acc:Q9SA34]	9	0	0	0	0	0	0	0	0	0
426	TBIM000426	Bsv0100-00000426-RA	-	9	0	0	0	0	0	0	0	0	0
427	TBIM000427	Bsv0100-00000427-RA	DNA cross-link repair 1A protein [Source:SWISS;Acc:Q5QJC4]	9	8.07391	7.61309	9.47343	5.64659	5.20133	4.88095	2.45748	2.34439	2.78738
428	TBIM000428	Bsv0100-00000428-RA	-	9	0.170217	0.163281	0	0	0	0	0	0.0872593	0
429	TBIM000429	Bsv0100-00000429-RA	Putative disease resistance protein RGA1 [Source:SWISS;Acc:Q7XA42]	9	0	0.255308	0	0	0	0	0	0	0
430	TBIM000430	Bsv0100-00000430-RA	-	9	31.4189	32.7412	27.4128	26.6967	28.5713	22.3827	12.3795	10.5929	10.2534
431	TBIM000431	Bsv0100-00000431-RA	Putative receptor protein kinase ZmPK1 [Source:SWISS;Acc:P17801]	9	0.204247	0.053559	0.0876193	0.171629	0.226442	0.0495248	1.80222	0.166536	0.380615
432	TBIM000432	Bsv0100-00000432-RA	Probable LRR receptor-like serine/threonine-protein kinase At1g29720 [Source:SWISS;Acc:Q9ASQ6]	9	0	0.0634149	0	0	0	0	0	0	0
433	TBIM000433	Bsv0100-00000433-RA	Putative receptor protein kinase ZmPK1 [Source:SWISS;Acc:P17801]	9	0	0	0	0	0	0	0	0	0
434	TBIM000434	Bsv0100-00000434-RA	Exocyst complex component SEC3A [Source:SWISS;Acc:Q9SX85]	9	0	0	0	0	0	0	0	0	0
435	TBIM000435	Bsv0100-00000435-RA	30S ribosomal protein S3, chloroplastic [Source:SWISS;Acc:P09595]	9	0	0	0	0	0	0.332132	0	0	0
436	TBIM000436	Bsv0100-00000436-RA	ATP synthase subunit beta, chloroplastic [Source:SWISS;Acc:P00825]	9	0	0.189095	0	0	0.216199	0	0	0	1.81934
437	TBIM000437	Bsv0100-00000437-RA	ATP synthase subunit beta, chloroplastic [Source:SWISS;Acc:Q8MBQ1]	9	0.425132	0.100685	0	0	0.114128	0	0	0.211942	0
438	TBIM000438	Bsv0100-00000438-RA	ATP synthase epsilon chain, chloroplastic [Source:SWISS;Acc:P00833]	9	0	0	0	0	0	0	0	0	0
439	TBIM000439	Bsv0100-00000439-RA	ATP synthase epsilon chain, chloroplastic [Source:SWISS;Acc:P00833]	9	171.852	131.069	166.527	83.7446	241.81	379.993	135.329	209.366	446.01
440	TBIM000440	Bsv0100-00000440-RA	ATP synthase subunit beta, chloroplastic [Source:SWISS;Acc:Q95DR6]	9	0.354568	0.168231	0	0.100789	0.190606	0.572435	0.189692	0.618352	0.946893
441	TBIM000441	Bsv0100-00000441-RA	Galactokinase [Source:SWISS;Acc:Q9SEE5]	9	0	0	0	0	0	0	0	0	0
442	TBIM000442	Bsv0100-00000442-RA	Thioredoxin-like 1-1, chloroplastic [Source:SWISS;Acc:O64654]	9	28.6326	28.2041	27.3851	31.0159	30.653	41.1366	21.4766	57.8909	54.4229
443	TBIM000443	Bsv0100-00000443-RA	CWF19-like protein 2 [Source:SWISS;Acc:Q28C44]	9	0	0	0	0	0	0	0	0	0
444	TBIM000444	Bsv0100-00000444-RA	(DL)-glycerol-3-phosphatase 1 [Source:SWISS;Acc:F4JTE7]	9	24.1405	24.7876	25.198	23.6359	22.7968	22.5105	12.5966	14.4375	12.6734
445	TBIM000445	Bsv0100-00000445-RA	54S ribosomal protein L51, mitochondrial [Source:SWISS;Acc:Q9UUC8]	9	33.6113	33.8289	38.1245	29.8626	30.1873	32.8116	14.3049	19.6704	15.5087
446	TBIM000446	Bsv0100-00000446-RA	Eukaryotic translation initiation factor 2A [Source:SWISS;Acc:Q7ZY11]	9	22.3337	21.479	22.8526	20.1143	20.3464	19.9753	14.7793	15.0983	13.1905
447	TBIM000447	Bsv0100-00000447-RA	-	9	12.8262	13.4656	1.4959	17.8807	15.392	2.97799	27.6893	3.51038	5.27548
448	TBIM000448	Bsv0100-00000448-RA	Transcription factor bHLH112 [Source:SWISS;Acc:Q94JL3]	9	16.7958	16.495	10.6308	11.2221	9.72407	3.71104	24.6961	4.80763	4.59828
449	TBIM000449	Bsv0100-00000449-RA	-	9	0	0	0	0	0	0	0	0	0
450	TBIM000450	Bsv0100-00000450-RA	-	9	0	0	0	0	0	0	0	0	0
451	TBIM000451	Bsv0100-00000451-RA	Protein IRX15-LIKE [Source:SWISS;Acc:Q9FH92]	9	7.37817	7.16267	8.25725	10.7962	9.4598	9.54687	2.72612	3.77806	5.67273
452	TBIM000452	Bsv0100-00000452-RA	15 kDa selenoprotein [Source:SWISS;Acc:O60613]	9	41.8377	43.3681	44.9511	35.5043	32.6029	32.5947	18.3778	21.6302	18.2998
453	TBIM000453	Bsv0100-00000453-RA	Transcription initiation factor TFIID subunit 1 [Source:SWISS;Acc:Q8LRK9]	9	6.27055	5.48602	6.90133	5.20713	6.64501	6.30917	5.32104	6.12146	7.19443
454	TBIM000454	Bsv0100-00000454-RA	C2 and GRAM domain-containing protein At1g03370 [Source:SWISS;Acc:Q9ZVT9]	9	7.90819	7.41517	6.46131	10.934	11.8601	5.88353	14.7476	8.10175	8.18301
455	TBIM000455	Bsv0100-00000455-RA	Aldo-keto reductase family 4 member C9 [Source:SWISS;Acc:Q0PGJ6]	9	0.678189	0.577373	1.08237	0.646991	0.310148	0.975357	2.48891	3.99578	3.54257
456	TBIM000456	Bsv0100-00000456-RA	-	9	13.0513	13.021	12.2712	8.62467	8.22723	7.85836	7.52165	7.57071	6.04858
457	TBIM000457	Bsv0100-00000457-RA	Bet1-like protein At4g14600 [Source:SWISS;Acc:Q8VXX9]	9	19.2708	16.747	16.6977	17.5739	14.6974	16.507	15.1929	12.3613	13.7526
458	TBIM000458	Bsv0100-00000458-RA	-	9	0	0	0	0.0151113	0	0	0	0	0
459	TBIM000459	Bsv0100-00000459-RA	-	9	0	0	0	0	0	0	0	0	0
460	TBIM000460	Bsv0100-00000460-RA	-	9	0	0	0	0	0	0	0	0	0
461	TBIM000461	Bsv0100-00000461-RA	Protein FAR1-RELATED SEQUENCE 6 [Source:SWISS;Acc:Q9SSQ4]	9	0	0	0	0	0	0	0	0	0
462	TBIM000462	Bsv0100-00000462-RA	-	9	22.9954	23.2747	22.2998	18.2335	16.805	12.7637	11.0543	7.99484	8.5711
463	TBIM000463	Bsv0100-00000463-RA	-	9	20.419	18.7504	26.031	7.87596	8.50004	10.8518	1.40008	3.69311	3.35327
464	TBIM000464	Bsv0100-00000464-RA	-	9	0	0	0	0	0	0	0	0	0
465	TBIM000465	Bsv0100-00000465-RA	Protein IQ-DOMAIN 14 [Source:SWISS;Acc:Q8LPG9]	9	35.2964	33.571	55.4635	31.25	34.9178	41.7957	20.0545	25.5636	24.5126
466	TBIM000466	Bsv0100-00000466-RA	Acyl-[acyl-carrier-protein] desaturase, chloroplastic [Source:SWISS;Acc:P22243]	9	0.632785	0.664022	0.857932	0.590231	0.941785	0.678482	0	0	0.103067
467	TBIM000467	Bsv0100-00000467-RA	Copia protein [Source:SWISS;Acc:P04146]	9	0	0	0	0	0	0	0	0	0
468	TBIM000468	Bsv0100-00000468-RA	Acyl-[acyl-carrier-protein] desaturase, chloroplastic [Source:SWISS;Acc:P22337]	9	0	0	0	0	0	0	0	0	0
469	TBIM000469	Bsv0100-00000469-RA	-	9	0	0	0	0	0	0	0	0	0
470	TBIM000470	Bsv0100-00000470-RA	Acyl-[acyl-carrier-protein] desaturase, chloroplastic [Source:SWISS;Acc:P22243]	9	0.175635	0.0568372	0.135324	0	0	0	0	0	0
471	TBIM000471	Bsv0100-00000471-RA	Acyl-[acyl-carrier-protein] desaturase, chloroplastic [Source:SWISS;Acc:P22337]	9	0.0579657	0	0	0	0	0	0	0.118859	0
472	TBIM000472	Bsv0100-00000472-RA	Acyl-[acyl-carrier-protein] desaturase, chloroplastic [Source:SWISS;Acc:P28645]	9	137.347	138.376	136.128	150.579	137.426	149.905	141.401	138.252	108.462
473	TBIM000473	Bsv0100-00000473-RA	Protein FAM136A [Source:SWISS;Acc:Q2HJI3]	9	23.9736	32.7765	36.3003	28.4411	23.1011	38.8687	6.99836	17.7787	20.5292
474	TBIM000474	Bsv0100-00000474-RA	-	9	73.5406	76.9433	106.302	45.501	77.6214	118.328	36.5196	72.5777	59.319
475	TBIM000475	Bsv0100-00000475-RA	(+)-neomenthol dehydrogenase [Source:SWISS;Acc:B2X050]	9	0	0	0.307501	0	0	0	0.414919	0	0
476	TBIM000476	Bsv0100-00000476-RA	Cysteine synthase, chloroplastic/chromoplastic [Source:SWISS;Acc:P32260]	9	175.284	178.971	180.264	203.979	195.337	243.716	174.132	204.99	175.553
477	TBIM000477	Bsv0100-00000477-RA	-	9	132.275	132.037	167.418	74.1183	68.9539	53.2924	1.34214	4.39609	3.78022
478	TBIM000478	Bsv0100-00000478-RA	Calcium sensing receptor, chloroplastic [Source:SWISS;Acc:Q9FN48]	9	41.2412	43.3996	40.0149	55.925	50.8696	61.9686	88.3611	79.4307	72.4813
479	TBIM000479	Bsv0100-00000479-RA	3-oxoacyl-[acyl-carrier-protein] synthase III, chloroplastic [Source:SWISS;Acc:Q07510]	9	41.9993	41.7719	42.487	39.7162	40.0066	39.1601	25.9069	23.6728	24.7733
480	TBIM000480	Bsv0100-00000480-RA	Protein FAR-RED ELONGATED HYPOCOTYL 3 [Source:SWISS;Acc:Q9LIE5]	9	0	0	0	0	0	0	0	0	0
481	TBIM000481	Bsv0100-00000481-RA	-	9	0	0	0	0	0	0	0	0	0
482	TBIM000482	Bsv0100-00000482-RA	U5 small nuclear ribonucleoprotein 200 kDa helicase [Source:SWISS;Acc:O75643]	9	16.531	14.9069	15.6906	11.7779	15.6198	11.943	10.0983	10.2238	12.7618
483	TBIM000483	Bsv0100-00000483-RA	Putative U5 small nuclear ribonucleoprotein 200 kDa helicase [Source:SWISS;Acc:Q9VUV9]	9	6.06972	5.73362	6.07125	3.92264	6.49825	5.53667	3.20561	4.79011	7.86314
484	TBIM000484	Bsv0100-00000484-RA	None [Source:SWISS;Acc:Q8GXS3]	9	28.2104	28.8984	28.6098	23.7098	22.0892	22.5907	17.9611	16.9495	15.9956
485	TBIM000485	Bsv0100-00000485-RA	Putative lipid phosphate phosphatase 3, chloroplastic [Source:SWISS;Acc:Q8LFD1]	9	0.257746	0	0.394124	0.198191	0.0956314	0	0.0938518	0	0
486	TBIM000486	Bsv0100-00000486-RA	-	9	23.5483	25.5856	27.2415	21.4159	20.977	20.5648	15.0024	14.9736	12.3694
487	TBIM000487	Bsv0100-00000487-RA	-	9	0.719647	0	0	0	0	0	0	0	0
488	TBIM000488	Bsv0100-00000488-RA	-	9	15.9618	18.9364	16.5118	14.2205	13.0754	11.4695	5.35809	7.1038	6.09139
489	TBIM000489	Bsv0100-00000489-RA	K(+) efflux antiporter 2, chloroplastic [Source:SWISS;Acc:O65272]	9	36.84	36.1854	45.5705	42.8703	46.268	54.053	37.547	47.3799	51.2422
490	TBIM000490	Bsv0100-00000490-RA	-	9	0.235014	0.111377	0.390818	0.13414	0.168485	0.201718	0.181817	0.0783742	0.151982
491	TBIM000491	Bsv0100-00000491-RA	-	9	1.24679	1.41493	1.17324	0.893756	1.23398	1.21018	0.614858	0.564879	0.414261
492	TBIM000492	Bsv0100-00000492-RA	-	9	0	0	0	0	0	0	0	0	1.45162
493	TBIM000493	Bsv0100-00000493-RA	-	9	0	0	0	0	0	0	0	0	0
494	TBIM000494	Bsv0100-00000494-RA	-	9	0	0	0	0	0	0	0	0	0
495	TBIM000495	Bsv0100-00000495-RA	-	9	0.809013	0.712857	0.31926	0.524694	0.435693	1.04111	0	0	0
496	TBIM000496	Bsv0100-00000496-RA	Bifunctional protein FolD 4, chloroplastic [Source:SWISS;Acc:O65271]	9	14.8884	14.4967	18.9675	15.1698	13.3882	19.3133	11.2857	14.231	12.8282
497	TBIM000497	Bsv0100-00000497-RA	Putative threonine aspartase [Source:SWISS;Acc:O65268]	9	4.48161	4.16198	4.05792	3.40673	3.23705	2.61489	2.8433	1.6832	2.27677
498	TBIM000498	Bsv0100-00000498-RA	-	9	0.734244	0.176508	0.399287	0.825008	0.997973	0.707861	0.38721	0.182488	0.60677
499	TBIM000499	Bsv0100-00000499-RA	(+)-neomenthol dehydrogenase [Source:SWISS;Acc:Q9M2E2]	9	25.3104	26.5049	19.0629	25.4049	26.7962	18.9749	16.4935	14.1504	11.24
500	TBIM000500	Bsv0100-00000500-RA	NAD-dependent malic enzyme 59 kDa isoform, mitochondrial [Source:SWISS;Acc:P37225]	9	777.453	783.462	840.204	1121.5	1093.17	1848.15	1951.31	2199.19	1933.42
501	TBIM000501	Bsv0100-00000501-RA	-	9	96.4921	95.0329	85.5062	72.237	93.7019	93.0431	48.7775	56.8805	46.4258
502	TBIM000502	Bsv0100-00000502-RA	-	9	10.9043	11.4201	11.394	14.3538	9.79602	11.9489	7.16386	9.96551	5.43518
503	TBIM000503	Bsv0100-00000503-RA	-	9	0	0	0	0	0	0	0	0	0
504	TBIM000504	Bsv0100-00000504-RA	-	9	0	0	0	0	0	0	0	0	0
505	TBIM000505	Bsv0100-00000505-RA	-	9	0.0270249	0	0	0	0.0300851	0.0359062	0	0	0
506	TBIM000506	Bsv0100-00000506-RA	Copper methylamine oxidase [Source:SWISS;Acc:Q07123]	9	0	0	0	0	0	0	0	0	0
507	TBIM000507	Bsv0100-00000507-RA	-	9	0.429057	0.398131	0	0.501534	0	0	1.37818	0	0
508	TBIM000508	Bsv0100-00000508-RA	Copper methylamine oxidase [Source:SWISS;Acc:Q07123]	9	0	0	0	0	0	0	0	0	0
509	TBIM000509	Bsv0100-00000509-RA	None [Source:SWISS;Acc:Q94JX5]	9	2.65999	2.85971	0	4.11283	0.478858	5.83805	13.6319	9.54977	4.40728
510	TBIM000510	Bsv0100-00000510-RA	Digalactosyldiacylglycerol synthase 2, chloroplastic [Source:SWISS;Acc:Q6DW73]	9	17.5026	17.7627	25.9464	18.7394	17.5552	17.5747	16.0115	19.7743	15.751
511	TBIM000511	Bsv0100-00000511-RA	Elicitor-responsive protein 3 [Source:SWISS;Acc:Q0JBH9]	9	11.2488	15.7429	16.6506	9.96771	9.4439	6.93475	3.58371	2.89564	5.3622
512	TBIM000512	Bsv0100-00000512-RA	-	9	0	0	0	0	0	0	0	0	0
513	TBIM000513	Bsv0100-00000513-RA	-	9	0	0	0	0	0	0	0	0	0
514	TBIM000514	Bsv0100-00000514-RA	-	9	37.3972	39.6382	43.7021	43.271	40.4602	45.6005	58.19	54.8778	47.089
515	TBIM000515	Bsv0100-00000515-RA	Cell division protein FtsY homolog, chloroplastic [Source:SWISS;Acc:O80842]	9	54.2387	52.8078	49.1134	54.3768	55.3006	52.1012	42.2878	43.7889	34.7236
516	TBIM000516	Bsv0100-00000516-RA	-	9	0	0	0	0	0	0	0	0	0
517	TBIM000517	Bsv0100-00000517-RA	-	9	0	0	0	0	0	0	0	0	0
518	TBIM000518	Bsv0100-00000518-RA	-	9	0	0	0	0	0	0	0	0	0
519	TBIM000519	Bsv0100-00000519-RA	-	9	0	0	0	0	0	0	0	0	0
520	TBIM000520	Bsv0100-00000520-RA	Protein FAR1-RELATED SEQUENCE 6 [Source:SWISS;Acc:Q9SSQ4]	9	0	0	0	0	0	0	0	0	0
521	TBIM000521	Bsv0100-00000521-RA	BON1-associated protein 1 [Source:SWISS;Acc:Q941L2]	9	0	0	0	0.230036	0	0	0	0	0
522	TBIM000522	Bsv0100-00000522-RA	E3 ubiquitin-protein ligase At4g11680 [Source:SWISS;Acc:Q93Z92]	9	25.3172	26.3663	22.3441	24.8783	23.7696	18.2164	24.8076	16.517	18.2543
523	TBIM000523	Bsv0100-00000523-RA	Shaggy-related protein kinase theta [Source:SWISS;Acc:Q96287]	9	36.0411	35.2605	33.5385	30.4373	28.8562	21.72	20.8682	16.6893	16.6048
524	TBIM000524	Bsv0100-00000524-RA	Homeobox-leucine zipper protein ANTHOCYANINLESS 2 [Source:SWISS;Acc:Q0WV12]	9	47.49	49.9581	49.0948	48.6349	47.8996	40.5922	23.9021	27.1263	26.3538
525	TBIM000525	Bsv0100-00000525-RA	Probable methyltransferase PMT13 [Source:SWISS;Acc:Q93W95]	9	47.0331	51.4578	50.2345	47.357	44.3666	39.7634	32.9452	23.8667	23.7901
526	TBIM000526	Bsv0100-00000526-RA	COP9 signalosome complex subunit 1 [Source:SWISS;Acc:P45432]	9	29.3335	27.6026	33.3494	25.5755	24.0802	27.0825	16.73	18.6839	14.6298
527	TBIM000527	Bsv0100-00000527-RA	Auxin-binding protein ABP19a [Source:SWISS;Acc:Q9ZRA4]	9	0	0	0	0	0	0	0	0	0
528	TBIM000528	Bsv0100-00000528-RA	Probable methyltransferase PMT15 [Source:SWISS;Acc:Q9ZPH9]	9	0.639962	0.392054	0.617618	1.24975	0.894025	0.825796	9.52974	2.6025	1.97634
529	TBIM000529	Bsv0100-00000529-RA	Arginine/serine-rich-splicing factor RSP41 [Source:SWISS;Acc:P92966]	9	0	0	0	0	0	0	0	0	0
530	TBIM000530	Bsv0100-00000530-RA	DNA-directed RNA polymerases II, IV and V subunit 6A [Source:SWISS;Acc:Q9FJ98]	9	174.942	184.415	203.312	140.264	143.096	143.898	86.1992	103.046	95.6424
531	TBIM000531	Bsv0100-00000531-RA	F-box protein PP2-A13 [Source:SWISS;Acc:Q9LEX0]	9	12.8068	13.1932	5.39851	21.2877	18.2451	15.7364	65.9916	47.2727	44.5436
532	TBIM000532	Bsv0100-00000532-RA	F-box protein At4g00755 [Source:SWISS;Acc:Q8LG03]	9	20.2424	22.9696	19.1684	21.2777	20.9792	14.7399	20.5783	15.7211	13.2033
533	TBIM000533	Bsv0100-00000533-RA	Uncharacterized acetyltransferase At3g50280 [Source:SWISS;Acc:Q9SND9]	9	20.6464	21.0318	21.2044	14.8097	13.68	10.6988	6.10695	4.30211	4.03521
534	TBIM000534	Bsv0100-00000534-RA	Peroxisomal membrane protein 11C [Source:SWISS;Acc:Q9LQ73]	9	32.1588	32.2132	25.4575	30.6755	32.9648	20.267	39.7703	24.2446	28.1333
535	TBIM000535	Bsv0100-00000535-RA	U-box domain-containing protein 4 [Source:SWISS;Acc:O22193]	9	12.8875	13.2685	13.4024	13.3338	11.9959	9.5261	8.77526	6.61388	6.53092
536	TBIM000536	Bsv0100-00000536-RA	Arginine/serine-rich-splicing factor RSP40 [Source:SWISS;Acc:P92965]	9	35.8275	37.7918	45.9353	26.0893	25.7904	29.4077	14.5227	18.0224	16.9706
537	TBIM000537	Bsv0100-00000537-RA	RING-H2 finger protein ATL34 [Source:SWISS;Acc:Q9C7I1]	9	18.2341	18.8591	9.16944	21.1566	19.9515	8.23706	29.1086	9.20774	15.8356
538	TBIM000538	Bsv0100-00000538-RA	Peroxisome biogenesis protein 16 [Source:SWISS;Acc:Q8S8S1]	9	5.95346	6.92878	6.00241	5.96278	5.31578	5.70326	3.54237	3.97694	4.98545
539	TBIM000539	Bsv0100-00000539-RA	Ubiquitin-related modifier 1 homolog 2 [Source:SWISS;Acc:B3H7G2]	9	43.2376	44.112	51.4243	34.2225	36.1084	43.7994	33.1057	46.3448	32.6519
540	TBIM000540	Bsv0100-00000540-RA	ATPase ASNA1 homolog [Source:SWISS;Acc:Q16MG9]	9	31.9317	33.8614	29.9111	33.3519	30.7811	27.3329	22.3246	19.7871	17.6415
541	TBIM000541	Bsv0100-00000541-RA	SPX domain-containing membrane protein At4g22990 [Source:SWISS;Acc:Q93ZQ5]	9	12.1146	12.2612	22.0042	13.4124	11.9734	23.9395	3.99117	9.01868	6.8863
542	TBIM000542	Bsv0100-00000542-RA	Carbamoyl-phosphate synthase large chain, chloroplastic [Source:SWISS;Acc:Q42601]	9	59.6475	59.8574	64.6983	53.9694	55.4743	49.5395	24.0782	19.7213	23.8828
543	TBIM000543	Bsv0100-00000543-RA	-	9	0	0	0	0	0	0	0	0	0
544	TBIM000544	Bsv0100-00000544-RA	-	9	0	0	0	0	0	0	0	0	0
545	TBIM000545	Bsv0100-00000545-RA	-	9	0	0	0	0	0	0	0	0	0
546	TBIM000546	Bsv0100-00000546-RA	[Fructose-bisphosphate aldolase]-lysine N-methyltransferase, chloroplastic [Source:SWISS;Acc:Q9XI84]	9	10.7752	11.3455	10.5131	8.58006	8.25193	8.26465	4.72643	4.85421	5.10698
547	TBIM000547	Bsv0100-00000547-RA	Vacuolar iron transporter 1 [Source:SWISS;Acc:Q9ZUA5]	9	0	0	0.0535417	0	0	0	0	0	0
548	TBIM000548	Bsv0100-00000548-RA	UDP-galactose/UDP-glucose transporter 4 [Source:SWISS;Acc:Q9LDX3]	9	17.6213	19.673	42.4181	31.0032	26.9583	47.022	8.88386	24.6777	26.6929
549	TBIM000549	Bsv0100-00000549-RA	-	9	13.7393	14.2016	14.6475	12.8568	13.8701	11.5057	0.732416	2.7073	2.73022
550	TBIM000550	Bsv0100-00000550-RA	Two-component response regulator ARR12 [Source:SWISS;Acc:P62598]	9	30.721	30.921	33.9399	20.3208	18.9066	19.8488	11.1036	14.5843	11.1348
551	TBIM000551	Bsv0100-00000551-RA	Flap endonuclease GEN-like 1 [Source:SWISS;Acc:Q9LPD2]	9	11.738	11.8681	11.1047	9.26023	9.87561	7.76564	7.24844	6.6095	6.19115
552	TBIM000552	Bsv0100-00000552-RA	-	9	8.48805	8.70181	10.271	8.49413	8.12998	7.78546	7.97083	10.2018	5.94579
553	TBIM000553	Bsv0100-00000553-RA	Ribosomal RNA small subunit methyltransferase A [Source:SWISS;Acc:Q6ME80]	9	16.7672	18.8741	15.0836	21.8176	20.7411	20.0767	29.0768	28.0388	26.8702
554	TBIM000554	Bsv0100-00000554-RA	Protein-ribulosamine 3-kinase, chloroplastic [Source:SWISS;Acc:Q9LEW8]	9	38.676	40.8981	43.3487	54.6612	49.0581	58.2658	79.3722	76.3138	66.798
555	TBIM000555	Bsv0100-00000555-RA	Cytosolic sulfotransferase 15 [Source:SWISS;Acc:Q8L5A7]	9	0.0746504	0.0721408	0.0871181	0.17261	0.248748	0	0	0	0
556	TBIM000556	Bsv0100-00000556-RA	-	9	0	0	0	0	0	0	0	0	0
557	TBIM000557	Bsv0100-00000557-RA	Ataxin-10 [Source:SWISS;Acc:Q2TBW0]	9	18.3351	16.4655	13.4061	15.7116	14.3541	12.4916	9.69162	10.1356	9.2206
558	TBIM000558	Bsv0100-00000558-RA	Phospholipase D beta 1 [Source:SWISS;Acc:P93733]	9	10.8187	10.5282	14.7917	11.8434	12.6136	10.9016	12.3192	9.34294	9.39703
559	TBIM000559	Bsv0100-00000559-RA	Xylem serine proteinase 1 [Source:SWISS;Acc:Q9LLL8]	9	3.46218	2.97551	3.91328	2.80887	3.04452	3.53838	0.92648	1.67653	1.53971
560	TBIM000560	Bsv0100-00000560-RA	-	9	0	0	0	0	0	0	0	0	0
561	TBIM000561	Bsv0100-00000561-RA	Subtilisin-like protease SDD1 [Source:SWISS;Acc:O64495]	9	2.6849	6.36476	7.79663	6.70313	1.54365	5.51657	0	0	0
562	TBIM000562	Bsv0100-00000562-RA	CRS2-associated factor 1, mitochondrial [Source:SWISS;Acc:Q8VYD9]	9	12.5978	12.4568	14.5345	11.3991	11.1764	12.6181	8.32186	8.9124	8.386
563	TBIM000563	Bsv0100-00000563-RA	Lysophospholipid acyltransferase LPEAT2 [Source:SWISS;Acc:Q8S8S2]	9	13.1661	14.3488	12.6138	13.9473	12.1725	10.954	8.94198	8.54983	8.05156
564	TBIM000564	Bsv0100-00000564-RA	MADS-box protein SOC1 [Source:SWISS;Acc:O64645]	9	38.6587	36.3081	42.6445	31.8945	32.3209	33.4852	10.2531	16.4076	17.5939
565	TBIM000565	Bsv0100-00000565-RA	Uracil phosphoribosyltransferase [Source:SWISS;Acc:P93394]	9	64.2883	63.6	74.8424	66.9971	65.0605	78.6277	49.0231	59.0627	49.6641
566	TBIM000566	Bsv0100-00000566-RA	Agamous-like MADS-box protein AGL6 [Source:SWISS;Acc:P29386]	9	0.0988175	0	0.112663	0	0	0	0	0	0
567	TBIM000567	Bsv0100-00000567-RA	-	9	0	0	0	0	0	0	0	0	0
568	TBIM000568	Bsv0100-00000568-RA	-	9	0	0	0	0	0	0	0	0	0
569	TBIM000569	Bsv0100-00000569-RA	-	9	0	0	0	0	0	0	0	0	0
570	TBIM000570	Bsv0100-00000570-RA	Histone deacetylase complex subunit SAP18 [Source:SWISS;Acc:O64644]	9	19.5012	21.1581	22.1877	15.8752	18.961	19.4447	8.72584	10.8526	11.6164
571	TBIM000571	Bsv0100-00000571-RA	Polygalacturonate 4-alpha-galacturonosyltransferase [Source:SWISS;Acc:Q9LE59]	9	44.3329	42.8319	42.1509	43.4719	40.0425	37.6175	27.0449	24.071	21.4087
572	TBIM000572	Bsv0100-00000572-RA	-	9	0	0	0	0	0	0	0	0	0
573	TBIM000573	Bsv0100-00000573-RA	DNA topoisomerase 3-alpha [Source:SWISS;Acc:Q9NG98]	9	0	0.236559	0	0	0	0	0	0	0
574	TBIM000574	Bsv0100-00000574-RA	Gibberellin 20 oxidase 1 [Source:SWISS;Acc:Q39110]	9	5.58683	6.76185	6.03884	4.71336	4.94127	2.76981	2.23676	1.18892	1.16038
575	TBIM000575	Bsv0100-00000575-RA	Glyoxylate/hydroxypyruvate reductase HPR3 [Source:SWISS;Acc:Q9LE33]	9	7.56734	8.64749	8.91654	7.32291	7.11297	5.83411	2.744	3.97628	3.29972
576	TBIM000576	Bsv0100-00000576-RA	Retrovirus-related Pol polyprotein from transposon TNT 1-94 [Source:SWISS;Acc:P10978]	9	0	0	0	0.109008	0	0	0	0	0
577	TBIM000577	Bsv0100-00000577-RA	-	9	0	0	0	0	0	0	0	0	0
578	TBIM000578	Bsv0100-00000578-RA	Glyoxylate/hydroxypyruvate reductase HPR3 [Source:SWISS;Acc:Q9LE33]	9	6.07632	5.57621	5.8994	5.28254	5.66003	6.64717	8.74796	11.3442	10.4034
579	TBIM000579	Bsv0100-00000579-RA	Glyoxylate/hydroxypyruvate reductase HPR3 [Source:SWISS;Acc:Q9LE33]	9	13.3256	13.1214	16.9009	16.671	13.9778	19.5242	28.8505	34.702	29.9932
580	TBIM000580	Bsv0100-00000580-RA	-	9	0.0690169	0.0329564	0	0	0	0	0.0714943	0	0
581	TBIM000581	Bsv0100-00000581-RA	Probable 2-oxoacid dependent dioxygenase [Source:SWISS;Acc:Q9SKK4]	9	39.7415	42.2387	40.9405	57.6583	54.9926	45.9153	91.4298	60.452	51.5832
582	TBIM000582	Bsv0100-00000582-RA	1-aminocyclopropane-1-carboxylate oxidase homolog 4 [Source:SWISS;Acc:Q94A78]	9	35.2827	39.7201	28.185	50.6497	47.2418	36.2705	87.1098	49.4261	39.639
583	TBIM000583	Bsv0100-00000583-RA	1-aminocyclopropane-1-carboxylate oxidase homolog 5 [Source:SWISS;Acc:Q43383]	9	0	0	0	0	0.174328	0.212371	0.167263	0	0
584	TBIM000584	Bsv0100-00000584-RA	1-aminocyclopropane-1-carboxylate oxidase homolog 3 [Source:SWISS;Acc:Q8H1S4]	9	0	0	0	0	0	0	0	0	0
585	TBIM000585	Bsv0100-00000585-RA	-	9	3.69153	3.54282	2.30948	3.39272	3.65138	2.04603	6.52564	2.58027	3.01899
586	TBIM000586	Bsv0100-00000586-RA	Small ubiquitin-related modifier 2 [Source:SWISS;Acc:Q6DHL4]	9	0.276212	0.263004	0.624841	0.317286	0	0	0	0	0
587	TBIM000587	Bsv0100-00000587-RA	-	9	0	0	0	0	0	0	0	0	0
588	TBIM000588	Bsv0100-00000588-RA	Poly(A) RNA polymerase cid11 [Source:SWISS;Acc:O74326]	9	34.2642	33.9322	27.9973	25.2858	24.9821	16.0532	20.9708	15.1873	14.1647
589	TBIM000589	Bsv0100-00000589-RA	Probable carboxylesterase 9 [Source:SWISS;Acc:O64641]	9	0	0	0	0	0	0	0	0	0
590	TBIM000590	Bsv0100-00000590-RA	Probable carboxylesterase 8 [Source:SWISS;Acc:O64640]	9	97.4884	101.817	79.4554	99.6148	87.2563	74.0082	39.5687	31.931	29.2683
591	TBIM000591	Bsv0100-00000591-RA	Receptor-like serine/threonine-protein kinase At2g45590 [Source:SWISS;Acc:O64639]	9	16.4105	15.3683	21.7118	14.631	19.3585	16.6925	6.18221	9.93588	13.2749
592	TBIM000592	Bsv0100-00000592-RA	BTB/POZ domain-containing protein At5g03250 [Source:SWISS;Acc:Q9LYW0]	9	0.607652	0	0	0	0	0	0	0	0
593	TBIM000593	Bsv0100-00000593-RA	Synaptotagmin-5 [Source:SWISS;Acc:Q8L706]	9	34.5426	34.9539	41.13	35.2377	35.2006	41.303	42.128	37.4927	31.5122
594	TBIM000594	Bsv0100-00000594-RA	Replication factor A protein 1 [Source:SWISS;Acc:P22336]	9	0	0	0	0	0	0	0	0	0.305283
595	TBIM000595	Bsv0100-00000595-RA	Ubiquitin-conjugating enzyme E2 22 [Source:SWISS;Acc:Q9FF66]	9	76.8171	85.8066	65.1883	75.5183	69.3277	54.8085	53.1175	42.386	34.1995
596	TBIM000596	Bsv0100-00000596-RA	-	9	0.4212	0.168086	0.340114	0.0505053	0.425386	0.178583	0.0440558	0.0928823	0.0989476
597	TBIM000597	Bsv0100-00000597-RA	Retrovirus-related Pol polyprotein from transposon TNT 1-94 [Source:SWISS;Acc:P10978]	9	0	0.120329	0	0	0	0	0	0	0
598	TBIM000598	Bsv0100-00000598-RA	Geraniol 8-hydroxylase [Source:SWISS;Acc:Q8VWZ7]	9	0	0	0	0	0	0	0	0	0
599	TBIM000599	Bsv0100-00000599-RA	Geraniol 8-hydroxylase [Source:SWISS;Acc:Q8VWZ7]	9	19.0471	19.2616	6.86641	21.7191	20.0931	6.47122	16.7722	2.90041	2.75705
600	TBIM000600	Bsv0100-00000600-RA	Geraniol 8-hydroxylase [Source:SWISS;Acc:Q8VWZ7]	9	1.2906	1.70623	0.468756	1.48342	1.26711	0.221858	0.181468	0	0
601	TBIM000601	Bsv0100-00000601-RA	Cytochrome P450 76C2 [Source:SWISS;Acc:O64637]	9	0	0	0	0	0	0	0	0	0
602	TBIM000602	Bsv0100-00000602-RA	Geraniol 8-hydroxylase [Source:SWISS;Acc:Q8VWZ7]	9	0	0	0	0	0	0	0	0.157165	0
603	TBIM000603	Bsv0100-00000603-RA	Geraniol 8-hydroxylase [Source:SWISS;Acc:Q8VWZ7]	9	0	0	0	0	0	0	0	0	0
604	TBIM000604	Bsv0100-00000604-RA	-	9	1.69489	0.81316	0.993778	1.95703	0.950339	0.754521	0.30492	0.841953	5.62498
605	TBIM000605	Bsv0100-00000605-RA	Geraniol 8-hydroxylase [Source:SWISS;Acc:Q8VWZ7]	9	0.0978462	0	0.112347	0.169518	0.16046	0.127566	1.151	0.639258	0.60395
606	TBIM000606	Bsv0100-00000606-RA	BEACH domain-containing protein lvsC [Source:SWISS;Acc:Q54U63]	9	17.4764	15.1028	21.722	15.2443	17.0125	15.801	9.65524	10.2525	10.9117
607	TBIM000607	Bsv0100-00000607-RA	-	9	13.1233	13.1164	20.4173	12.5969	12.7049	16.5846	6.58627	9.11976	6.03659
608	TBIM000608	Bsv0100-00000608-RA	Cytochrome P450 704C1 [Source:SWISS;Acc:Q50EK3]	9	1.43382	1.50092	1.53388	0.629118	0.373396	0.223885	0.314889	0.167684	0.146313
609	TBIM000609	Bsv0100-00000609-RA	Dihydrolipoyllysine-residue acetyltransferase component 3 of pyruvate dehydrogenase complex, mitochondrial [Source:SWISS;Acc:Q5M729]	9	119.813	122.328	135.213	132.872	123.145	120.464	75.5472	76.9778	60.7426
610	TBIM000610	Bsv0100-00000610-RA	Cytochrome P450 704C1 [Source:SWISS;Acc:Q50EK3]	9	0.0354216	0	0.0418389	0	0	0	0	0	0
611	TBIM000611	Bsv0100-00000611-RA	Cytochrome P450 704C1 [Source:SWISS;Acc:Q50EK3]	9	0	0	0	0	0	0	0	0	0
612	TBIM000612	Bsv0100-00000612-RA	-	9	0	0	0	0	0	0	0	0	0
613	TBIM000613	Bsv0100-00000613-RA	Cytochrome P450 704C1 [Source:SWISS;Acc:Q50EK3]	9	0.0325723	0.0630587	0.0386577	0.0754228	0.0365142	0	0	0.0639112	0.0572822
614	TBIM000614	Bsv0100-00000614-RA	Histone H1.2 [Source:SWISS;Acc:P26569]	9	155.11	156.424	203.101	117.859	118.764	119.554	53.3271	55.7974	55.7229
615	TBIM000615	Bsv0100-00000615-RA	-	9	0	0	0	0	0	0	0	0	0
616	TBIM000616	Bsv0100-00000616-RA	-	9	0	0	0	0	0	0	0	0	0
617	TBIM000617	Bsv0100-00000617-RA	None [Source:SWISS;Acc:Q1PDV2]	9	19.9597	19.6765	21.1044	13.5785	13.568	15.5969	9.70055	12.4712	10.8564
618	TBIM000618	Bsv0100-00000618-RA	ATP sulfurylase 1, chloroplastic [Source:SWISS;Acc:Q9LIK9]	9	48.5496	47.8975	44.1273	43.3361	41.6595	36.1023	30.9685	32.0288	26.9234
619	TBIM000619	Bsv0100-00000619-RA	-	9	0	0	0	0	0	0	0	0	0
620	TBIM000620	Bsv0100-00000620-RA	Pentatricopeptide repeat-containing protein At5g50990 [Source:SWISS;Acc:Q9FI49]	9	0.123273	0	0	0	0	0.161558	0	0	0
621	TBIM000621	Bsv0100-00000621-RA	-	9	0	0	0	0	0	0	0	0	0
622	TBIM000622	Bsv0100-00000622-RA	Transcription factor GAMYB [Source:SWISS;Acc:Q0JIC2]	9	0	0	0	0	0	0	0	0	0
623	TBIM000623	Bsv0100-00000623-RA	-	9	0.273746	0.0872542	0.21127	0.102849	0.100183	0.243336	0.0953317	0	0
624	TBIM000624	Bsv0100-00000624-RA	-	9	0	0	0	0	0	0	0	0	0
625	TBIM000625	Bsv0100-00000625-RA	F-box/LRR-repeat protein At4g14103 [Source:SWISS;Acc:Q8L7H1]	9	23.3383	23.3586	24.2015	21.2024	20.9767	17.8366	10.2264	10.7918	11.4733
626	TBIM000626	Bsv0100-00000626-RA	-	9	0	0	0	0	0	0	0	0	0
627	TBIM000627	Bsv0100-00000627-RA	-	9	0	0	0	0	0	0	0	0	0
628	TBIM000628	Bsv0100-00000628-RA	-	9	0	0	0	0	0	0	0	0	0
629	TBIM000629	Bsv0100-00000629-RA	-	9	0	0	0	0	0	0	0	0	0
630	TBIM000630	Bsv0100-00000630-RA	-	9	0	0	0	0	0	0	0	0	0
631	TBIM000631	Bsv0100-00000631-RA	-	9	0	0	0	0	0	0	0	0	0
632	TBIM000632	Bsv0100-00000632-RA	-	9	0	0	0	0	0	0	0	0	0
633	TBIM000633	Bsv0100-00000633-RA	Putative ribonuclease H protein At1g65750 [Source:SWISS;Acc:P0C2F6]	9	0	0	0	0	0	0	0	0	0
634	TBIM000634	Bsv0100-00000634-RA	-	9	0	0	0	0	0	0	0	0	0
635	TBIM000635	Bsv0100-00000635-RA	-	9	0	0	0	0	0	0	0	0	0
636	TBIM000636	Bsv0100-00000636-RA	-	9	0	0	0	0	0	0	0	0	0
637	TBIM000637	Bsv0100-00000637-RA	-	9	0	0	0	0	0	0	0	0	0
638	TBIM000638	Bsv0100-00000638-RA	-	9	0	0	0	0	0	0	0	0	0
639	TBIM000639	Bsv0100-00000639-RA	-	9	12.6688	14.4536	10.8566	10.3118	9.63782	6.36774	6.11805	3.93857	3.63504
640	TBIM000640	Bsv0100-00000640-RA	Putative protein FAR1-RELATED SEQUENCE 10 [Source:SWISS;Acc:Q9LKR4]	9	0	0	0	0	0	0	0	0	0
641	TBIM000641	Bsv0100-00000641-RA	-	9	0	0	0	0	0	0	0	0	0
642	TBIM000642	Bsv0100-00000642-RA	-	9	0	0	0	0	0	0	0	0	0
643	TBIM000643	Bsv0100-00000643-RA	-	9	0	0	0	0	0	0	0	0	0
644	TBIM000644	Bsv0100-00000644-RA	Mitochondrial import inner membrane translocase subunit TIM14-1 [Source:SWISS;Acc:Q8RV04]	9	0	0	0	0	0	0	0	0	0
645	TBIM000645	Bsv0100-00000645-RA	-	9	0	0	0	0	0	0	0	0	0
646	TBIM000646	Bsv0100-00000646-RA	-	9	17.9215	21.1218	19.9615	16.261	15.0553	16.0226	14.4374	13.2892	20.1843
647	TBIM000647	Bsv0100-00000647-RA	-	9	0	0	0	0	0	0	0	0	0
648	TBIM000648	Bsv0100-00000648-RA	-	9	0	0	0	0	0	0	0	0	0
649	TBIM000649	Bsv0100-00000649-RA	-	9	60.1803	38.6225	38.8268	40.7343	66.8903	41.1532	48.0298	43.0496	28.0316
650	TBIM000650	Bsv0100-00000650-RA	-	9	16.3371	14.948	13.9441	21.4627	18.3906	22.5021	19.4207	16.6912	20.0031
651	TBIM000651	Bsv0100-00000651-RA	-	9	0.403392	0.447084	0.300838	0.23016	0.505789	0.77314	0.138301	1.18417	1.16837
652	TBIM000652	Bsv0100-00000652-RA	-	9	22.3883	23.1024	13.1124	29.0598	24.1274	17.1353	43.7535	21.7998	20.7021
653	TBIM000653	Bsv0100-00000653-RA	-	9	0	0	0	0	0	0	0	0	0
654	TBIM000654	Bsv0100-00000654-RA	-	9	197.643	197.279	425.956	124.377	143.869	192.715	26.6827	55.4695	39.963
655	TBIM000655	Bsv0100-00000655-RA	Lysine histidine transporter-like 8 [Source:SWISS;Acc:Q9SX98]	9	0	0	0	0	0	0	0	0	0
656	TBIM000656	Bsv0100-00000656-RA	-	9	29.9931	31.187	43.0929	29.6668	26.1567	44.9699	30.1829	44.2484	38.3925
657	TBIM000657	Bsv0100-00000657-RA	-	9	0	0	0	0	0	0	0	0	0
658	TBIM000658	Bsv0100-00000658-RA	-	9	36.8469	41.77	33.9943	45.6361	39.6664	44.4397	69.7718	67.2691	54.5435
659	TBIM000659	Bsv0100-00000659-RA	-	9	0.3118	0.182318	0	0.0744923	0.140675	0	0.0676785	0.125051	0.237175
660	TBIM000660	Bsv0100-00000660-RA	-	9	0	0	0	0	0	0	0	0	0
661	TBIM000661	Bsv0100-00000661-RA	-	9	0	0	0	0	0	0	0	0	0
662	TBIM000662	Bsv0100-00000662-RA	-	9	13.7887	8.21033	12.7193	13.4855	10.8987	5.56949	16.5897	5.90123	10.0256
663	TBIM000663	Bsv0100-00000663-RA	-	9	0.157981	0.449711	0	0	0	0.207479	0	0	0
664	TBIM000664	Bsv0100-00000664-RA	-	9	2.02876	2.16519	2.60094	1.04526	2.98341	1.47785	1.89917	1.37294	2.50558
665	TBIM000665	Bsv0100-00000665-RA	-	9	0	0	0	0	0	0	0	0	0
666	TBIM000666	Bsv0100-00000666-RA	-	9	14.2501	13.9656	14.3918	13.625	12.8973	10.9074	11.3216	13.7409	14.5658
667	TBIM000667	Bsv0100-00000667-RA	Chaperone protein DnaJ [Source:SWISS;Acc:Q75VW3]	9	7.8048	7.59643	7.25381	6.63365	6.84006	4.40599	7.76129	4.96002	4.69775
668	TBIM000668	Bsv0100-00000668-RA	-	9	0	0	0	0	0	0	0.0562807	0	0
669	TBIM000669	Bsv0100-00000669-RA	Adenylyl-sulfate kinase 3 [Source:SWISS;Acc:Q9SRW7]	9	6.47876	5.60241	6.80058	5.82975	5.88181	5.55172	6.11354	6.58185	5.73185
670	TBIM000670	Bsv0100-00000670-RA	-	9	0	0	0	0	0	0	0	0	0
671	TBIM000671	Bsv0100-00000671-RA	-	9	0	0	0	0	0	0	0	0	0
672	TBIM000672	Bsv0100-00000672-RA	-	9	0	0	0	0	0	0	0	0	0
673	TBIM000673	Bsv0100-00000673-RA	-	9	0	0	0	0	0	0	0	0	0
674	TBIM000674	Bsv0100-00000674-RA	Putative dual specificity protein phosphatase DSP8 [Source:SWISS;Acc:Q9ZQP1]	9	0	0	0	0	0	0	0	0	0
675	TBIM000675	Bsv0100-00000675-RA	-	9	0	0	0	0	0	0	0	0	0
676	TBIM000676	Bsv0100-00000676-RA	Maturase K [Source:SWISS;Acc:Q5J2X4]	9	0	0	0	0	0	0	0	0	0
677	TBIM000677	Bsv0100-00000677-RA	Maturase K [Source:SWISS;Acc:Q5J2X4]	9	0	0	0	0	0	0	0	0	0
678	TBIM000678	Bsv0100-00000678-RA	Photosystem Q(B) protein [Source:SWISS;Acc:Q68S26]	9	0.727868	0.228155	0.537252	0.395668	1.2949	0.63054	1.11822	0.589753	3.73553
679	TBIM000679	Bsv0100-00000679-RA	50S ribosomal protein L2, chloroplastic [Source:SWISS;Acc:P06509]	9	0.18446	0.0578882	0.275224	0.139106	0.526411	0.318054	0.064349	0.181423	0.899896
680	TBIM000680	Bsv0100-00000680-RA	Protein ELC [Source:SWISS;Acc:Q9LHG8]	9	35.9097	35.0323	42.2245	33.6205	37.2778	37.5864	33.9519	32.7802	29.5671
681	TBIM000681	Bsv0100-00000681-RA	-	9	1.45333	0.683721	0	0	1.5969	0	0	0	0
682	TBIM000682	Bsv0100-00000682-RA	-	9	0	0.209371	0.252045	0	0	0	0.463895	0.217472	0.383223
683	TBIM000683	Bsv0100-00000683-RA	-	9	0	0	0	0	0	0	0	0	0
684	TBIM000684	Bsv0100-00000684-RA	-	9	0	0	0	0	0	0	0	0	0
685	TBIM000685	Bsv0100-00000685-RA	Probable ADP-ribosylation factor GTPase-activating protein AGD14 [Source:SWISS;Acc:Q8RXE7]	9	8.96997	9.79327	8.41631	7.21383	6.30657	4.74896	4.88104	4.02308	3.5543
686	TBIM000686	Bsv0100-00000686-RA	-	9	0	0	0	0	0	0	0	0	0
687	TBIM000687	Bsv0100-00000687-RA	Pentatricopeptide repeat-containing protein At1g80880, mitochondrial [Source:SWISS;Acc:Q9SAH2]	9	6.12248	7.19557	6.91828	5.57754	7.09635	5.5441	4.93646	4.67343	5.22412
688	TBIM000688	Bsv0100-00000688-RA	-	9	0	0	0	0	0	0	0	0	0
689	TBIM000689	Bsv0100-00000689-RA	-	9	0	0	0	0	0	0	0	0	0
690	TBIM000690	Bsv0100-00000690-RA	-	9	0	0	0	0	0	0	0	0	0
691	TBIM000691	Bsv0100-00000691-RA	-	9	0	0	0	0	0	0	0	0	0
692	TBIM000692	Bsv0100-00000692-RA	Chaperone protein dnaJ 8, chloroplastic [Source:SWISS;Acc:Q9SAG8]	9	367.97	342.629	16.6162	469.84	468.983	86.5789	338.455	96.1884	142.513
693	TBIM000693	Bsv0100-00000693-RA	-	9	0	0	0	0	0	0	0	0	0
694	TBIM000694	Bsv0100-00000694-RA	-	9	0	0	0	0	0	0	0	0	0
695	TBIM000695	Bsv0100-00000695-RA	-	9	0	0	0	0	0	0	0	0	0
696	TBIM000696	Bsv0100-00000696-RA	-	9	0	0	0	0	0	0	0	0	0
697	TBIM000697	Bsv0100-00000697-RA	DNA topoisomerase 3-alpha [Source:SWISS;Acc:Q9NG98]	9	0	0	0	0	0	0	0	0	0
698	TBIM000698	Bsv0100-00000698-RA	Polygalacturonase [Source:SWISS;Acc:P48979]	9	0	0	0	0	0	0	0	0	0
699	TBIM000699	Bsv0100-00000699-RA	-	9	0	0.0849848	0	0	0.0972252	0	0	0	0
700	TBIM000700	Bsv0100-00000700-RA	Protein BRASSINAZOLE-RESISTANT 1 [Source:SWISS;Acc:Q8S307]	9	6.70476	7.56781	10.2589	5.93302	5.4513	6.15579	2.7709	3.06326	3.44177
701	TBIM000701	Bsv0100-00000701-RA	-	9	6.29231	5.44651	5.78956	4.27027	4.3701	3.56885	1.8739	2.66118	3.48908
702	TBIM000702	Bsv0100-00000702-RA	-	9	0	0	0	0	0	0	0	0.202096	0
703	TBIM000703	Bsv0100-00000703-RA	-	9	0	0.10333	0.126433	0	0	0	0	0	0
704	TBIM000704	Bsv0100-00000704-RA	-	9	0.0423479	0	0	0	0.0460712	0	0	0.0441162	0
705	TBIM000705	Bsv0100-00000705-RA	-	9	0.0496339	0	0	0	0	0	0	0	0
706	TBIM000706	Bsv0100-00000706-RA	Putative ribonuclease H protein At1g65750 [Source:SWISS;Acc:P0C2F6]	9	0	0	0	0	0	0	0	0	0
707	TBIM000707	Bsv0100-00000707-RA	Leishmanolysin-like peptidase [Source:SWISS;Acc:Q8BMN4]	9	13.5106	12.501	10.4788	10.6767	12.5589	8.32996	9.24161	7.57135	5.81005
708	TBIM000708	Bsv0100-00000708-RA	Cytochrome c oxidase assembly protein COX19 [Source:SWISS;Acc:Q54IA0]	9	0	0	0	0	0	0	0	0	0
709	TBIM000709	Bsv0100-00000709-RA	-	9	0.733953	0	0	0.545869	0.523704	0.958795	0.49671	0.730517	0.445916
710	TBIM000710	Bsv0100-00000710-RA	-	9	0	0.420429	0	0.249274	0.238858	0	0	0	0.379931
711	TBIM000711	Bsv0100-00000711-RA	-	9	0	0	0	0	0	0	0	0	0
712	TBIM000712	Bsv0100-00000712-RA	-	9	0.584437	0.28011	0.172739	0.0837097	0.161214	0.485983	0.53909	0.216136	0.529458
713	TBIM000713	Bsv0100-00000713-RA	Prolycopene isomerase, chloroplastic [Source:SWISS;Acc:Q9M9Y8]	9	0	0	0	0	0	0	0	0	0
714	TBIM000714	Bsv0100-00000714-RA	Probable galacturonosyltransferase-like 2 [Source:SWISS;Acc:Q9S7G2]	9	13.2429	10.7081	20.2174	14.1776	14.6849	17.1637	7.03164	9.43716	10.0316
715	TBIM000715	Bsv0100-00000715-RA	-	9	0	0	0	0	0	0	0	0	0
716	TBIM000716	Bsv0100-00000716-RA	ATP synthase epsilon chain, chloroplastic [Source:SWISS;Acc:P00833]	9	0	0	0	0	0	0	0	0	0
717	TBIM000717	Bsv0100-00000717-RA	-	9	0	0	0	0	0	0	0	0	0
718	TBIM000718	Bsv0100-00000718-RA	Protein DCL, chloroplastic [Source:SWISS;Acc:Q42463]	9	40.4732	48.3118	45.2993	52.7862	47.7596	51.2763	60.3103	64.8313	65.479
719	TBIM000719	Bsv0100-00000719-RA	-	9	0	0	0	0	0	0	0	0	0
720	TBIM000720	Bsv0100-00000720-RA	-	9	0.847816	1.33756	0.84834	0.880982	0.705799	0.96559	0.673406	0.416573	0.193924
721	TBIM000721	Bsv0100-00000721-RA	-	9	0	0	0	0	0	0	1.05563	0	0
722	TBIM000722	Bsv0100-00000722-RA	-	9	0	0	0	0	0	0	0	0	0
723	TBIM000723	Bsv0100-00000723-RA	-	9	0.176	0	0	0.198485	0	0	0	0	0
724	TBIM000724	Bsv0100-00000724-RA	-	9	0	0	0	0	0	0	0	0	0
725	TBIM000725	Bsv0100-00000725-RA	-	9	0.336877	0.312072	0	0.403126	0.369283	0	0	0	0
726	TBIM000726	Bsv0100-00000726-RA	-	9	0	0	0	0	0	0	0	0	0
727	TBIM000727	Bsv0100-00000727-RA	GTP-binding protein SAR1A [Source:SWISS;Acc:O04834]	9	50.9478	52.9634	52.719	43.2053	37.2575	44.7786	24.3342	30.5327	26.3189
728	TBIM000728	Bsv0100-00000728-RA	GTP-binding protein SAR1A [Source:SWISS;Acc:O04834]	9	59.0925	65.4176	59.1622	52.2202	55.7655	52.4414	40.655	38.3581	33.1676
729	TBIM000729	Bsv0100-00000729-RA	-	9	0	0	0	0	0	0	0	0	0
730	TBIM000730	Bsv0100-00000730-RA	-	9	0	0	0	0	0	0	0	0	0
731	TBIM000731	Bsv0100-00000731-RA	Universal stress protein A-like protein [Source:SWISS;Acc:Q8LGG8]	9	3.81638	3.29385	1.12556	5.31338	3.85946	3.34984	109.528	15.7544	14.0285
732	TBIM000732	Bsv0100-00000732-RA	50S ribosomal protein L16, chloroplastic [Source:SWISS;Acc:B2XWR1]	9	0	0	0	0	0	0	0	0	0
733	TBIM000733	Bsv0100-00000733-RA	-	9	0	0	0	0	0	0	2.91803	0	0
734	TBIM000734	Bsv0100-00000734-RA	-	9	0	0	0	0	0	0	0	0	0
735	TBIM000735	Bsv0100-00000735-RA	-	9	0	0	0	0	0	0	0	0	0
736	TBIM000736	Bsv0100-00000736-RA	-	9	0	0	0	0	0	0	0	0	0
737	TBIM000737	Bsv0100-00000737-RA	-	9	0	0	0	0	0	0	0	0	0
738	TBIM000738	Bsv0100-00000738-RA	E3 ubiquitin-protein ligase MARCH2 [Source:SWISS;Acc:Q9P0N8]	9	7.01246	4.15998	1.30857	6.89399	6.95188	1.31132	45.0457	1.70707	1.84693
739	TBIM000739	Bsv0100-00000739-RA	DNA mismatch repair protein MSH6 [Source:SWISS;Acc:O04716]	9	8.07853	7.91559	9.73467	5.10638	5.54281	4.70658	2.39278	2.3809	2.75332
740	TBIM000740	Bsv0100-00000740-RA	-	9	0	0	0	0	0	0	0	0	0
741	TBIM000741	Bsv0100-00000741-RA	-	9	0	0	0	0	0	0	0	0	0
742	TBIM000742	Bsv0100-00000742-RA	Pentatricopeptide repeat-containing protein At5g14820, mitochondrial [Source:SWISS;Acc:Q9LEQ7]	9	22.4627	21.3821	24.8418	19.277	19.6454	19.7404	11.8864	15.7384	17.468
743	TBIM000743	Bsv0100-00000743-RA	Acyltransferase-like protein At3g26840, chloroplastic [Source:SWISS;Acc:Q9LW26]	9	6.18802	6.56998	7.31244	7.00176	6.66438	9.90093	7.70002	7.6992	6.34338
744	TBIM000744	Bsv0100-00000744-RA	-	9	8.53467	9.97872	9.4503	7.71316	8.14636	5.21434	2.66197	2.34171	2.46056
745	TBIM000745	Bsv0100-00000745-RA	Putative FBD-associated F-box protein At5g22720 [Source:SWISS;Acc:Q9FNI9]	9	11.3658	11.2259	10.4083	12.6575	11.1049	7.85753	11.308	8.30146	5.65199
746	TBIM000746	Bsv0100-00000746-RA	Probable ubiquitin-conjugating enzyme E2 25 [Source:SWISS;Acc:Q9LUQ5]	9	0	0	0	0	0	0	0	0	0
747	TBIM000747	Bsv0100-00000747-RA	-	9	0	0	0	0	0	0	0	0	0
748	TBIM000748	Bsv0100-00000800-RA	Transcription factor TCP14 [Source:SWISS;Acc:Q93Z00]	9	39.8056	41.8864	54.3275	31.0584	29.9675	37.2485	30.1959	27.2097	23.5011
749	TBIM000749	Bsv0100-00000801-RA	-	9	0.0768941	0	0	0	0	0	0	0	0
750	TBIM000750	Bsv0100-00000802-RA	Protein FAR1-RELATED SEQUENCE 5 [Source:SWISS;Acc:Q9SZL8]	9	0.0387541	0	0.0428578	0	0	0	0	0	0.073529
751	TBIM000751	Bsv0100-00000803-RA	RNA polymerase sigma factor sigF, chloroplastic [Source:SWISS;Acc:Q9LD95]	9	35.8816	37.7239	35.3636	49.1374	47.692	48.3365	62.8889	54.2474	49.7888
752	TBIM000752	Bsv0100-00000804-RA	Pentatricopeptide repeat-containing protein At2g32630 [Source:SWISS;Acc:Q8S8P6]	9	3.35101	3.42292	2.87574	3.80145	4.08551	2.7649	2.59913	2.40687	3.3287
753	TBIM000753	Bsv0100-00000805-RA	Putative threonine aspartase [Source:SWISS;Acc:O65268]	9	0	0	0	0	0	0	0	0	0
754	TBIM000754	Bsv0100-00000806-RA	Ubiquitin-conjugating enzyme E2 variant 1D [Source:SWISS;Acc:Q9SVD7]	9	0	0	0	0	0	0	0	0	0
755	TBIM000755	Bsv0100-00000807-RA	-	9	0	0	0	0	0	0	0	0	0
756	TBIM000756	Bsv0100-00000808-RA	-	9	0	0	0	0	0	0	0	0	0
757	TBIM000757	Bsv0100-00000809-RA	Cellular nucleic acid-binding protein homolog [Source:SWISS;Acc:P36627]	9	9.81573	11.0359	10.4089	10.2719	10.7927	8.87013	14.0295	6.44862	7.41991
758	TBIM000758	Bsv0100-00000810-RA	-	9	0	0	0	0	0	0	0	0	0
759	TBIM000759	Bsv0100-00000811-RA	-	9	5.64712	5.34121	5.81779	3.99712	4.13613	5.16115	2.52464	3.65625	3.50765
760	TBIM000760	Bsv0100-00000812-RA	-	9	0	0	0	0	0	0	0	0	0
761	TBIM000761	Bsv0100-00000813-RA	-	9	0	0	0	0	0	0	0	0	0
762	TBIM000762	Bsv0100-00000814-RA	-	9	0	0	0	0	0	0	0	0	0
763	TBIM000763	Bsv0100-00000815-RA	60S ribosomal protein L12 [Source:SWISS;Acc:O50003]	9	218.454	223.912	240.078	213.619	180.779	234.474	124.254	162.487	163.569
764	TBIM000764	Bsv0100-00000816-RA	60S ribosomal protein L12 [Source:SWISS;Acc:O50003]	9	272.669	264.158	278.655	203.366	205.748	235.675	74.1648	116.834	98.4305
765	TBIM000765	Bsv0100-00000817-RA	-	9	0	0	0	0	0	0	0	0	0
766	TBIM000766	Bsv0100-00000818-RA	Aquaporin PIP2-1 [Source:SWISS;Acc:P43286]	9	371.363	393.887	739.436	504.969	499.856	754.185	396.726	860.767	821.295
767	TBIM000767	Bsv0100-00000819-RA	Phosphatidylinositol 4-phosphate 5-kinase 2 [Source:SWISS;Acc:Q8L796]	9	0	0	0	0	0	0	0	0	0
768	TBIM000768	Bsv0100-00000820-RA	Putative Peroxidase 48 [Source:SWISS;Acc:O81755]	9	1.88775	2.83476	3.45789	2.51303	2.59608	2.58725	3.11415	2.09703	2.05297
769	TBIM000769	Bsv0100-00000821-RA	-	9	0	0	0	0	0	0	0	0	0
770	TBIM000770	Bsv0100-00000822-RA	-	9	8.58477	7.46575	5.01807	9.09106	9.01904	6.38212	8.28519	8.13461	4.65864
771	TBIM000771	Bsv0100-00000823-RA	-	9	0	0	0	0	0	0	0	0	0
772	TBIM000772	Bsv0100-00000824-RA	-	9	0	0	0	0	0	0	0	0	0
773	TBIM000773	Bsv0100-00000825-RA	-	9	0.0252508	0.0237346	0.0285033	0	0.0272231	0	0.100705	0.0749302	0.0533537
774	TBIM000774	Bsv0100-00000826-RA	Serine/threonine-protein kinase-like protein CCR1 [Source:SWISS;Acc:Q9S7D9]	9	1.84936	2.42962	0.849165	1.23005	0.991822	0.574342	0.336615	0.259409	0.241842
775	TBIM000775	Bsv0100-00000827-RA	-	9	0	0	0	0	0	0	0	0	0
776	TBIM000776	Bsv0100-00000828-RA	Pentatricopeptide repeat-containing protein At2g35130 [Source:SWISS;Acc:O82178]	9	0	0	0	0	0	0	0	0	0
777	TBIM000777	Bsv0100-00000829-RA	-	9	0	0	0	0	0	0	0	0	0
778	TBIM000778	Bsv0100-00000830-RA	-	9	0	0	0.0884032	0	0	0	0	0	0
779	TBIM000779	Bsv0100-00000831-RA	-	9	0	0	0	0	0	0	0	0	0
780	TBIM000780	Bsv0100-00000832-RA	Transposon TX1 uncharacterized 149 kDa protein [Source:SWISS;Acc:P14381]	9	0	0	0	0	0	0.129404	0	0	0
781	TBIM000781	Bsv0100-00000833-RA	-	9	0	0	0	0	0	0	0	0	0
782	TBIM000782	Bsv0100-00000834-RA	Putative AC9 transposase [Source:SWISS;Acc:P03010]	9	0	0	0	0	0	0	0	0	0
783	TBIM000783	Bsv0100-00000861-RA	Putative ribonuclease H protein At1g65750 [Source:SWISS;Acc:P0C2F6]	9	0	0	0	0	0	0	0	0	0
784	TBIM000784	Bsv0100-00000862-RA	Amino acid permease 3 [Source:SWISS;Acc:Q39134]	9	46.9136	50.0941	17.7341	61.4066	55.21	18.7938	151.877	31.8795	26.9743
785	TBIM000785	Bsv0100-00000863-RA	-	9	0	0	0	0	0	0	0	0	0
786	TBIM000786	Bsv0100-00000864-RA	Chloride channel protein CLC-f [Source:SWISS;Acc:Q8RXR2]	9	8.60338	8.57492	8.76343	8.3272	9.00913	6.98369	7.23894	5.02753	5.74684
787	TBIM000787	Bsv0100-00000865-RA	-	9	0	0	0	0	0	0	0	0	0
788	TBIM000788	Bsv0100-00000866-RA	26S proteasome non-ATPase regulatory subunit 9 [Source:SWISS;Acc:Q9WTV5]	9	28.3907	31.1247	28.2037	22.12	24.3643	22.2204	16.7775	15.7245	12.9513
789	TBIM000789	Bsv0100-00000867-RA	Ras-related protein RABA5a [Source:SWISS;Acc:Q9FGK5]	9	44.8678	47.7723	43.6919	36.7422	38.9123	33.4105	30.2139	23.6841	20.2905
790	TBIM000790	Bsv0100-00000868-RA	Protein IQ-DOMAIN 32 [Source:SWISS;Acc:Q9FXI5]	9	52.4231	53.1764	45.2156	45.465	43.6392	29.5697	46.9083	30.6986	28.207
791	TBIM000791	Bsv0100-00000869-RA	BRASSINOSTEROID INSENSITIVE 1-associated receptor kinase 1 [Source:SWISS;Acc:Q94F62]	9	0.0598677	0	0.103789	0.102154	0.131369	0.157215	0.0621644	0.176028	0.103894
792	TBIM000792	Bsv0100-00000870-RA	Serpin-ZX [Source:SWISS;Acc:Q9S7T8]	9	38.2221	36.8325	37.7274	30.0834	29.0527	26.356	14.81	18.9115	16.6599
793	TBIM000793	Bsv0100-00000871-RA	Serpin-ZX [Source:SWISS;Acc:Q9S7T8]	9	0	0	0	0	0	0	0	0	0
794	TBIM000794	Bsv0100-00000872-RA	-	9	0	0	0	0	0	0	0	0	0
795	TBIM000795	Bsv0100-00000873-RA	-	9	0	0	0	0	0	0	0	0	0
796	TBIM000796	Bsv0100-00000874-RA	-	9	0	0	0	0	0	0	0	0	0
797	TBIM000797	Bsv0100-00000875-RA	-	9	0	0	0	0	0	0	0	0	0
798	TBIM000798	Bsv0100-00000876-RA	Heat shock 70 kDa protein cognate 1 [Source:SWISS;Acc:P02826]	9	0	0	0	0	0	0	0	0	0
799	TBIM000799	Bsv0100-00000877-RA	-	9	0	0	0	0	0	0	0	0	0
800	TBIM000800	Bsv0100-00000878-RA	-	9	0	0	0.055426	0	0.105124	0	0	0	0.0867187
801	TBIM000801	Bsv0100-00000879-RA	-	9	0	0	0.154726	0	0	0	0	0	0
802	TBIM000802	Bsv0100-00000880-RA	Serpin-ZXA [Source:SWISS;Acc:Q75H81]	9	4.4026	4.03966	3.39723	5.16464	3.27959	3.12006	1.46154	1.60338	3.29918
803	TBIM000803	Bsv0100-00000881-RA	-	9	0	0	0	0	0	0	0	0	0
804	TBIM000804	Bsv0100-00000882-RA	-	9	0	0	0	0	0	0	0	0	0
805	TBIM000805	Bsv0100-00000883-RA	-	9	0	0	0	0	0	0	0	0	0
806	TBIM000806	Bsv0100-00000884-RA	-	9	0	0	0	0	0	0	0	0	0
807	TBIM000807	Bsv0100-00000885-RA	-	9	0.130467	0	0	0	0	0.0567651	0	0	0
808	TBIM000808	Bsv0100-00000886-RA	-	9	0	0	0	0	0	0	0	0	0
809	TBIM000809	Bsv0100-00000887-RA	-	9	0	0	0	0	0	0	0	0	0
810	TBIM000810	Bsv0100-00000835-RA	-	9	0	0	0	0	0	0	0	0	0
811	TBIM000811	Bsv0100-00000836-RA	-	9	0	0	0	0	0	0	0	0	0
812	TBIM000812	Bsv0100-00000837-RA	-	9	0	0	0	0	0	0	0	0	0
813	TBIM000813	Bsv0100-00000838-RA	MLP-like protein 31 [Source:SWISS;Acc:Q941R6]	9	42.1669	40.4848	68.3144	10.4601	9.13825	6.32275	0.819144	1.70814	2.00868
814	TBIM000814	Bsv0100-00000839-RA	-	9	0	0	0	0	0	0	0	0	0
815	TBIM000815	Bsv0100-00000840-RA	-	9	0	0	0	0	0	0	0	0	0
816	TBIM000816	Bsv0100-00000841-RA	-	9	0	0	0	0	0	0	0	0	0
817	TBIM000817	Bsv0100-00000842-RA	-	9	0	0	0	0	0	0	0	0	0
818	TBIM000818	Bsv0100-00000843-RA	-	9	0	0	0	0	0	0	0	0	0
819	TBIM000819	Bsv0100-00000844-RA	-	9	0	0	0	0	0	0	0	0	0
820	TBIM000820	Bsv0100-00000845-RA	None [Source:SWISS;Acc:Q0JMB2]	9	0	0	0	0	0	0	0	0	0
821	TBIM000821	Bsv0100-00000846-RA	-	9	0	0	0	0	0	0	0	0	0
822	TBIM000822	Bsv0100-00000847-RA	Photosystem II CP47 chlorophyll apoprotein [Source:SWISS;Acc:B2XWP9]	9	0	0	0	0	0	0	0	0	0
823	TBIM000823	Bsv0100-00000848-RA	Photosystem II CP47 chlorophyll apoprotein [Source:SWISS;Acc:A7Y3H4]	9	0	0	0	0	0	0	0	0	0
824	TBIM000824	Bsv0100-00000849-RA	Protein PsbN [Source:SWISS;Acc:A6MMN5]	9	0	0	0	0	0	0	0	0	0
825	TBIM000825	Bsv0100-00000850-RA	Photosystem II reaction center protein H [Source:SWISS;Acc:Q06RA3]	9	0	0	0	0	0	0	0	0	0
826	TBIM000826	Bsv0100-00000851-RA	Cytochrome b6 [Source:SWISS;Acc:Q2L933]	9	0	0	0	0	0	0	0	0	0
827	TBIM000827	Bsv0100-00000852-RA	-	9	0	0	0	0	0	0	0	0	0
828	TBIM000828	Bsv0100-00000853-RA	ER membrane protein complex subunit 2 [Source:SWISS;Acc:Q6TGY8]	9	56.3377	61.0279	54.8996	47.9439	49.4638	48.011	40.8688	40.4042	29.3967
829	TBIM000829	Bsv0100-00000854-RA	-	9	0	0	0	0	0	0	0	0	0
830	TBIM000830	Bsv0100-00000855-RA	-	9	0	0	0	0	0	0	0	0	0
831	TBIM000831	Bsv0100-00000856-RA	GTP-binding protein YPTM2 [Source:SWISS;Acc:Q05737]	9	63.9702	66.8843	69.2682	63.7547	61.4422	66.4995	47.9813	51.3035	38.7212
832	TBIM000832	Bsv0100-00000857-RA	Anthocyanidin 3-O-glucosyltransferase 7 [Source:SWISS;Acc:Q40289]	9	25.4602	26.5088	21.9352	23.6876	19.4359	15.4315	5.331	8.21927	7.07716
833	TBIM000833	Bsv0100-00000858-RA	-	9	0	0	0	0	0	0	0	0	0
834	TBIM000834	Bsv0100-00000859-RA	Probable zinc protease PqqL [Source:SWISS;Acc:P31828]	9	9.11087	8.8854	11.3041	8.60938	9.05925	8.70454	6.23353	6.67597	5.71591
835	TBIM000835	Bsv0100-00000860-RA	Photosystem II reaction center protein K [Source:SWISS;Acc:P12163]	9	0	0	0	0	0	0	0	0	0
836	TBIM000836	Bsv0100-00000748-RA	Protease 2 [Source:SWISS;Acc:Q59536]	9	26.5082	24.8448	25.5797	21.6805	21.3671	18.9203	11.3669	11.0832	10.605
837	TBIM000837	Bsv0100-00000749-RA	-	9	21.1849	21.4053	20.112	35.665	34.587	25.5071	92.7589	59.1912	50.2512
838	TBIM000838	Bsv0100-00000750-RA	High mobility group B protein 7 [Source:SWISS;Acc:Q8LDF9]	9	134.877	141.878	139.35	69.2876	76.9474	53.7677	13.1147	16.3148	13.6251
839	TBIM000839	Bsv0100-00000751-RA	Putative SWI/SNF-related matrix-associated actin-dependent regulator of chromatin subfamily A member 3-like 2 [Source:SWISS;Acc:Q9FNI6]	9	21.2868	20.1595	21.1013	16.8308	18.4202	12.7395	10.01	7.36877	6.99195
840	TBIM000840	Bsv0100-00000752-RA	Protein ASPARTIC PROTEASE IN GUARD CELL 2 [Source:SWISS;Acc:Q9LHE3]	9	3.88418	3.85135	4.18034	3.50079	3.40592	4.43073	3.00734	2.57094	0.934208
841	TBIM000841	Bsv0100-00000753-RA	-	9	0	0	0	0	0	0	0	0	0
842	TBIM000842	Bsv0100-00000754-RA	-	9	0	0	0	0	0	0	0	0	0
843	TBIM000843	Bsv0100-00000755-RA	Antiviral protein MAP [Source:SWISS;Acc:P21326]	9	0	0	0	0	0	0	0	0	0
844	TBIM000844	Bsv0100-00000756-RA	F-box/kelch-repeat protein At3g06240 [Source:SWISS;Acc:Q8GXC7]	9	5.48714	5.16905	5.51347	4.52831	4.71959	3.23391	3.94999	3.96554	5.12409
845	TBIM000845	Bsv0100-00000757-RA	1-aminocyclopropane-1-carboxylate oxidase homolog 1 [Source:SWISS;Acc:Q84MB3]	9	0	0	0	0	0	0	0	0	0
846	TBIM000846	Bsv0100-00000758-RA	UPF0548 protein At2g17695 [Source:SWISS;Acc:Q8GXB1]	9	14.1958	6.55787	5.70584	19.0146	14.8006	12.5592	6.03004	10.4994	19.9862
847	TBIM000847	Bsv0100-00000759-RA	-	9	0	0.0601391	0	0	0	0	0	0	0
848	TBIM000848	Bsv0100-00000760-RA	-	9	0	0	0	0	0	0	0	0	0
849	TBIM000849	Bsv0100-00000761-RA	-	9	0	0	0	0	0	0	0	0	0
850	TBIM000850	Bsv0100-00000762-RA	-	9	0	0	0	0	0.0402363	0	0.0366471	0	0
851	TBIM000851	Bsv0100-00000763-RA	Photosystem II CP47 chlorophyll apoprotein [Source:SWISS;Acc:A6BM29]	9	0.214164	0.203678	0.23695	0	0.457376	1.08992	0.112999	0.309279	0.756305
852	TBIM000852	Bsv0100-00000764-RA	Calumenin [Source:SWISS;Acc:Q28BT4]	9	13.8886	15.7864	16.8767	14.2643	14.5242	10.1931	8.14871	5.36097	6.32206
853	TBIM000853	Bsv0100-00000765-RA	F-box/kelch-repeat protein At3g06240 [Source:SWISS;Acc:Q8GXC7]	9	8.21505	6.13015	7.12084	5.52481	5.87747	4.20828	6.28848	4.85625	5.54461
854	TBIM000854	Bsv0100-00000766-RA	Alpha-galactosidase [Source:SWISS;Acc:Q42656]	9	0	0	0	0	0	0	0	0	0
855	TBIM000855	Bsv0100-00000767-RA	-	9	0.0911353	0	0.100705	0	0	0	0	0	0
856	TBIM000856	Bsv0100-00000768-RA	S-type anion channel SLAH1 [Source:SWISS;Acc:Q5E930]	9	0	0.0582774	0	0	0	0	0	0	0
857	TBIM000857	Bsv0100-00000769-RA	-	9	0	0	0	0	0	0	0	0	0
858	TBIM000858	Bsv0100-00000770-RA	-	9	0	0	0	0	0	0	0	0	0
859	TBIM000859	Bsv0100-00000771-RA	-	9	0	0	0	0	0	0	0	0	0
860	TBIM000860	Bsv0100-00000772-RA	Transcription factor DIVARICATA [Source:SWISS;Acc:Q8S9H7]	9	24.7654	26.4731	13.6949	22.8558	22.4751	13.1301	22.8176	11.6265	12.8245
861	TBIM000861	Bsv0100-00000773-RA	None [Source:SWISS;Acc:Q6AVI0]	9	0	0	0	0	0	0	0	0	0
862	TBIM000862	Bsv0100-00000774-RA	Transposon Tf2-8 polyprotein [Source:SWISS;Acc:P0CT43]	9	0.140249	0.131494	0.221588	0.190368	0.151244	0.145677	0	0.136683	0.0547785
863	TBIM000863	Bsv0100-00000775-RA	-	9	0	0	0.234624	0	0	0	0	0	0.376482
864	TBIM000864	Bsv0100-00000776-RA	GEM-like protein 4 [Source:SWISS;Acc:Q9FTA0]	9	0.164862	0.0797626	0.380712	0.0969928	0	0.76233	0.0882537	0.591015	0
865	TBIM000865	Bsv0100-00000777-RA	GEM-like protein 4 [Source:SWISS;Acc:Q9FTA0]	9	0	0	0	0	0	0	0	0	0
866	TBIM000866	Bsv0100-00000778-RA	-	9	0	0	0	0	0	0	0	0	0
867	TBIM000867	Bsv0100-00000779-RA	GEM-like protein 4 [Source:SWISS;Acc:Q9FTA0]	9	2.46868	2.88643	1.301	2.66959	4.11041	2.74805	0.598489	1.21684	0.330736
868	TBIM000868	Bsv0100-00000780-RA	GEM-like protein 4 [Source:SWISS;Acc:Q9FTA0]	9	0.666745	1.11348	0.190309	1.62858	1.01204	0.328298	0	0.249327	0
869	TBIM000869	Bsv0100-00000781-RA	GEM-like protein 4 [Source:SWISS;Acc:Q9FTA0]	9	3.9622	4.49125	1.15933	5.00549	4.34503	1.84239	0.779025	1.43821	1.3017
870	TBIM000870	Bsv0100-00000782-RA	-	9	0.211677	0	0	0	0	0.268784	0	0	0
871	TBIM000871	Bsv0100-00000783-RA	F-box/LRR-repeat protein 4 [Source:SWISS;Acc:Q9C5D2]	9	21.8036	20.5945	12.9864	16.1787	17.7024	8.98264	14.0603	8.47494	9.4444
872	TBIM000872	Bsv0100-00000784-RA	Bifunctional enolase 2/transcriptional activator [Source:SWISS;Acc:P25696]	9	6.46271	5.09115	7.48204	2.32954	5.73913	2.78673	1.90764	2.75481	5.33169
873	TBIM000873	Bsv0100-00000785-RA	Pentatricopeptide repeat-containing protein At1g09900 [Source:SWISS;Acc:Q3EDF8]	9	4.46077	3.27751	5.90366	3.40287	3.89798	3.76653	1.12045	1.71418	2.66811
874	TBIM000874	Bsv0100-00000786-RA	Transmembrane protein 53-A [Source:SWISS;Acc:Q5PPS7]	9	14.1845	15.4795	12.116	17.631	16.4574	12.3419	14.8983	11.7108	9.22765
875	TBIM000875	Bsv0100-00000787-RA	Gypsy retrotransposon integrase-like protein 1 [Source:SWISS;Acc:Q8K259]	9	0	0	0.0578153	0	0	0	0	0.0522895	0
876	TBIM000876	Bsv0100-00000788-RA	Transcription factor MYC2 [Source:SWISS;Acc:Q39204]	9	1.29222	1.4786	3.67552	1.20943	0.845217	2.0001	0.277508	0.804122	0.471959
877	TBIM000877	Bsv0100-00000789-RA	Sucrose synthase 5 [Source:SWISS;Acc:F4K5W8]	9	4.4344	4.04874	4.86988	3.27255	3.29913	3.26267	1.55931	1.93615	2.63174
878	TBIM000878	Bsv0100-00000790-RA	-	9	0	0	0	0	0	0	0	0	0
879	TBIM000879	Bsv0100-00000791-RA	Protein FAR-RED IMPAIRED RESPONSE 1 [Source:SWISS;Acc:Q9SWG3]	9	0	0	0	0	0	0	0	0	0
880	TBIM000880	Bsv0100-00000792-RA	-	9	0	0	0	0	0	0	0	0	0
881	TBIM000881	Bsv0100-00000793-RA	-	9	0	0.236912	0	0	0	0	0	0	0
882	TBIM000882	Bsv0100-00000794-RA	Pathogenesis-related protein 1B [Source:SWISS;Acc:P07053]	9	0	0	0	0	0	0	0	0	0
883	TBIM000883	Bsv0100-00000795-RA	Cytochrome b [Source:SWISS;Acc:P42792]	9	65.2252	38.4728	61.7575	26.4032	61.4863	69.1126	27.7931	45.415	75.3113
884	TBIM000884	Bsv0100-00000796-RA	Pathogenesis-related protein 1C [Source:SWISS;Acc:P09042]	9	0	0	0	0	0	0	0	0	0
885	TBIM000885	Bsv0100-00000797-RA	Cationic peroxidase 1 [Source:SWISS;Acc:P22195]	9	0.204074	0.441954	0.238087	0.524796	0.167841	0.133897	0.107679	0.300764	0.0903029
886	TBIM000886	Bsv0100-00000798-RA	-	9	0	0	0	0	0	0	0	0	0
887	TBIM000887	Bsv0100-00000799-RA	Protein FAR1-RELATED SEQUENCE 2 [Source:SWISS;Acc:Q3EBQ3]	9	0	0	0	0	0	0	0	0	0
888	TBIM000888	Bsv0100-00000888-RA	-	9	198.717	208.79	180.614	219.378	210.561	191.037	177.474	170.754	130.722
889	TBIM000889	Bsv0100-00000889-RA	HAUS augmin-like complex subunit 4 [Source:SWISS;Acc:Q9H6D7]	9	43.8245	42.2828	43.1009	32.568	32.165	26.2522	13.8971	16.6977	14.4509
890	TBIM000890	Bsv0100-00000890-RA	NAD-dependent malic enzyme 65 kDa isoform, mitochondrial [Source:SWISS;Acc:P37224]	9	10.7308	10.8353	10.9912	13.2026	12.5781	12.4401	11.4099	12.5743	12.0127
891	TBIM000891	Bsv0100-00000891-RA	-	9	0	0	0	0	0	0	0	0	0
892	TBIM000892	Bsv0100-00000892-RA	-	9	13.1183	14.7428	14.6226	7.98771	8.25977	6.61921	3.38319	2.71277	2.59105
893	TBIM000893	Bsv0100-00000893-RA	Transcription initiation factor TFIID subunit 5 [Source:SWISS;Acc:Q6S7B0]	9	24.9293	25.0832	24.6724	20.6537	19.6447	19.0913	10.7553	10.1213	8.56802
894	TBIM000894	Bsv0100-00000894-RA	Non-specific phospholipase C3 [Source:SWISS;Acc:Q9SRQ6]	9	0.431943	0.331955	0.231098	0.659618	0.628669	0.561612	0.0904764	0.0283458	0.0512592
895	TBIM000895	Bsv0100-00000895-RA	-	9	0	0	0	0.0887321	0	0	0	0	0
896	TBIM000896	Bsv0100-00000896-RA	Protein FAR1-RELATED SEQUENCE 11 [Source:SWISS;Acc:Q9SY66]	9	0	0	0	0	0	0	0	0	0
897	TBIM000897	Bsv0100-00000897-RA	Ferredoxin--NADP reductase, root isozyme, chloroplastic [Source:SWISS;Acc:Q41014]	9	33.0071	32.6408	42.5876	27.746	27.2322	29.87	23.7848	22.8791	20.0401
898	TBIM000898	Bsv0100-00000898-RA	RING-H2 finger protein ATL52 [Source:SWISS;Acc:Q9LF64]	9	15.8739	17.8834	21.4975	15.2267	15.6296	23.6404	15.3648	25.1362	21.6414
899	TBIM000899	Bsv0100-00000899-RA	-	9	14.0893	11.5732	14.4012	13.4003	12.8839	15.2576	10.2706	12.4329	11.9224
900	TBIM000900	Bsv0100-00000900-RA	Protein SCAI [Source:SWISS;Acc:Q8C8N2]	9	6.90124	6.4857	6.49029	5.10797	5.58334	4.13837	2.42257	1.96458	2.01492
901	TBIM000901	Bsv0100-00000901-RA	17.6 kDa class II heat shock protein [Source:SWISS;Acc:P29830]	9	0	0	0	0	0	0	0	0	0
902	TBIM000902	Bsv0100-00000902-RA	Agamous-like MADS-box protein AGL62 [Source:SWISS;Acc:Q9FKK2]	9	0	0	0	0	0	0	0	0	0
903	TBIM000903	Bsv0100-00000903-RA	50S ribosomal protein L3, chloroplastic [Source:SWISS;Acc:O80360]	9	240.777	254.527	214.822	288.161	276.752	301.747	299.191	320.994	257.178
904	TBIM000904	Bsv0100-00000904-RA	SEC12-like protein 2 [Source:SWISS;Acc:Q39221]	9	21.5017	23.4932	23.5293	19.0014	19.328	19.0081	14.5549	14.3979	13.6945
905	TBIM000905	Bsv0100-00000905-RA	-	9	2.83448	3.41549	2.26464	2.29303	2.04376	2.22314	0.797925	0.751681	0.777342
906	TBIM000906	Bsv0100-00000906-RA	Pentatricopeptide repeat-containing protein At1g80150, mitochondrial [Source:SWISS;Acc:Q8GW57]	9	4.66376	4.49562	3.66994	3.77875	2.97926	2.26725	1.14556	1.51049	1.53492
907	TBIM000907	Bsv0100-00000907-RA	-	9	0	0	0	0	0	0	0	0	0
908	TBIM000908	Bsv0100-00000908-RA	-	9	150.716	147.496	2.57974	185.251	176.521	13.2719	122.003	3.55296	4.39851
909	TBIM000909	Bsv0100-00000909-RA	-	9	0	0	0	0	0	0	0	0	0
910	TBIM000910	Bsv0100-00000910-RA	Ent-kaurenoic acid oxidase 1 [Source:SWISS;Acc:O23051]	9	0.794332	0.692686	0.844375	0.936174	0.496507	0.69781	0.669859	0.699619	0.381734
911	TBIM000911	Bsv0100-00000911-RA	-	9	8.34303	7.93562	7.40275	6.74683	7.95677	6.46373	4.97863	8.19598	5.09353
912	TBIM000912	Bsv0100-00000912-RA	Ent-kaurenoic acid oxidase 1 [Source:SWISS;Acc:O23051]	9	0.248189	0.171431	0.208178	0.287713	0.0789853	0.329206	0.113123	0.212437	0.0611164
913	TBIM000913	Bsv0100-00000913-RA	Probable inactive tRNA-specific adenosine deaminase-like protein 3 [Source:SWISS;Acc:Q6PAT0]	9	45.8541	41.2742	54.5817	35.9922	38.0059	35.8871	22.8224	19.1985	18.5979
914	TBIM000914	Bsv0100-00000914-RA	Pentatricopeptide repeat-containing protein At4g11690 [Source:SWISS;Acc:Q9T0D6]	9	3.59249	4.04089	3.60639	2.72329	3.16132	2.49147	2.13728	1.61094	2.69452
915	TBIM000915	Bsv0100-00000915-RA	-	9	0	0	0	0	0	0	0	0	0
916	TBIM000916	Bsv0100-00000916-RA	-	9	0	0	0	0	0	0	0	0	0
917	TBIM000917	Bsv0100-00000917-RA	Uric acid degradation bifunctional protein TTL [Source:SWISS;Acc:Q9LVM5]	9	27.8244	31.4099	29.4623	29.9704	32.6064	27.4298	31.562	19.9925	18.766
918	TBIM000918	Bsv0100-00000918-RA	Nitrate transporter 1.5 [Source:SWISS;Acc:Q9LQL2]	9	0	0	0	0	0	0	0	0	0
919	TBIM000919	Bsv0100-00000919-RA	-	9	0	0	0	0	0	0	0	0	0
920	TBIM000920	Bsv0100-00000920-RA	Nitrate transporter 1.5 [Source:SWISS;Acc:Q9LQL2]	9	0	0	0	0	0	0	0	0	0.111927
921	TBIM000921	Bsv0100-00000921-RA	Nitrate transporter 1.5 [Source:SWISS;Acc:Q9LQL2]	9	0.109284	0.208122	0.332041	0.0414571	0.159023	0	0.076212	0	0
922	TBIM000922	Bsv0100-00000922-RA	Exocyst complex component SEC8 [Source:SWISS;Acc:Q93YU5]	9	25.6264	23.688	27.3092	24.5806	24.8084	21.4647	17.8482	15.478	15.2125
923	TBIM000923	Bsv0100-00000923-RA	-	9	0	0	0	0	0	0	0	0	0
924	TBIM000924	Bsv0100-00000924-RA	Aspartate--tRNA ligase [Source:SWISS;Acc:Q112K0]	9	21.9496	22.4419	24.3912	22.5404	24.9725	28.2755	15.0613	17.2122	14.8609
925	TBIM000925	Bsv0100-00000925-RA	Ribose-phosphate pyrophosphokinase 1 [Source:SWISS;Acc:Q9XG98]	9	105.117	111.161	113.345	143.621	137.036	178.896	204.289	197.741	169.369
926	TBIM000926	Bsv0100-00000926-RA	-	9	0	0	0	0	0	0	0	0	0
927	TBIM000927	Bsv0100-00000927-RA	-	9	6.15282	5.69378	5.32344	5.23333	4.13461	5.0723	5.00809	5.1937	3.004
928	TBIM000928	Bsv0100-00000928-RA	ABC transporter C family member 9 [Source:SWISS;Acc:Q9M1C7]	9	18.2997	16.6423	7.52359	26.9869	29.0581	16.8219	23.2124	17.5061	18.3699
929	TBIM000929	Bsv0100-00000929-RA	DNA replication ATP-dependent helicase/nuclease DNA2 [Source:SWISS;Acc:Q8QHA5]	9	6.9281	6.19468	9.21717	3.94812	4.60151	4.10249	1.20673	1.51506	1.29062
930	TBIM000930	Bsv0100-00000930-RA	None [Source:SWISS;Acc:O00370]	9	0	0	0.0210414	0	0	0	0	0	0
931	TBIM000931	Bsv0100-00000931-RA	Protein ECERIFERUM 1 [Source:SWISS;Acc:F4HVY0]	9	47.4705	45.204	27.6174	53.3004	54.4253	14.4742	1.70447	0.637543	0.655313
932	TBIM000932	Bsv0100-00000932-RA	-	9	0	0	0	0	0	0	0	0	0
933	TBIM000933	Bsv0100-00000933-RA	Non-specific phospholipase C3 [Source:SWISS;Acc:Q9SRQ6]	9	1.59789	1.66232	1.36442	1.51134	1.66328	1.85073	0.509257	1.85803	1.22213
934	TBIM000934	Bsv0100-00000934-RA	Non-specific phospholipase C4 [Source:SWISS;Acc:Q9SRQ7]	9	1.43456	1.17777	0.851459	1.13339	1.05122	1.84621	0	0.194655	0.205596
935	TBIM000935	Bsv0100-00000935-RA	GDP-mannose 4,6 dehydratase 2 [Source:SWISS;Acc:P93031]	9	15.6477	18.4643	20.5866	18.4174	16.1608	19.1773	7.80959	9.35759	8.3245
936	TBIM000936	Bsv0100-00000936-RA	Protein transport protein SEC23 [Source:SWISS;Acc:Q4PE39]	9	17.5724	18.2752	22.1491	19.4899	16.6566	17.7866	13.0587	14.5126	18.1823
937	TBIM000937	Bsv0100-00000937-RA	-	9	20.757	19.3507	17.087	16.2934	14.1432	15.7477	9.59427	9.80393	13.4186
938	TBIM000938	Bsv0100-00000938-RA	116 kDa U5 small nuclear ribonucleoprotein component [Source:SWISS;Acc:O08810]	9	30.0394	31.4296	35.5543	24.9944	26.6506	28.3477	12.627	13.9211	15.5126
939	TBIM000939	Bsv0100-00000939-RA	-	9	31.3496	29.779	29.5357	30.3567	30.1624	25.7853	29.7755	24.8903	30.4416
940	TBIM000940	Bsv0100-00000940-RA	Transcription factor bHLH91 [Source:SWISS;Acc:Q8GX46]	9	0	0	0.115907	0.0391774	0	0	0	0	0
941	TBIM000941	Bsv0100-00000941-RA	Isochorismate synthase, chloroplastic [Source:SWISS;Acc:Q9ZPC0]	9	11.0212	9.53386	10.6688	10.7295	10.0591	10.6497	11.8718	9.39659	9.94467
942	TBIM000942	Bsv0100-00000942-RA	Cytosolic sulfotransferase 13 [Source:SWISS;Acc:Q9ZPQ5]	9	10.2055	10.7644	9.65455	7.80197	9.06068	7.78617	4.17661	5.52046	5.65177
943	TBIM000943	Bsv0100-00000943-RA	-	9	7.36217	6.99347	7.97848	7.48349	8.12403	11.3226	31.4638	37.9766	33.4906
944	TBIM000944	Bsv0100-00000944-RA	tRNA (guanine-N(7)-)-methyltransferase [Source:SWISS;Acc:Q2JJQ0]	9	5.91215	5.88589	8.53915	5.00671	4.41676	6.94265	3.06191	2.56901	3.513
945	TBIM000945	Bsv0100-00000945-RA	Xylulose 5-phosphate/phosphate translocator, chloroplastic [Source:SWISS;Acc:Q9LF61]	9	14.4706	15.604	26.2698	9.69215	10.0514	13.9394	3.38134	8.17494	10.2297
946	TBIM000946	Bsv0100-00000946-RA	-	9	0	0	0	0	0	0	0	0	0
947	TBIM000947	Bsv0100-00000947-RA	Cytosolic sulfotransferase 15 [Source:SWISS;Acc:Q8L5A7]	9	0	0	0	0	0	0	0	0	0
948	TBIM000948	Bsv0100-00000948-RA	Cytosolic sulfotransferase 15 [Source:SWISS;Acc:Q8L5A7]	9	0	0	0	0	0	0	0	0	0
949	TBIM000949	Bsv0100-00000949-RA	Cytosolic sulfotransferase 10 [Source:SWISS;Acc:O82330]	9	0	0	0	0	0	0	0	0	0
950	TBIM000950	Bsv0100-00000950-RA	Cytosolic sulfotransferase 15 [Source:SWISS;Acc:Q8L5A7]	9	25.6096	22.2399	43.4643	11.8136	9.12113	15.6123	0	0	0
951	TBIM000951	Bsv0100-00000951-RA	Putative cytochrome c biogenesis ccmF-like mitochondrial protein [Source:SWISS;Acc:P93286]	9	0	0	0	0	0	0	0	0	0
952	TBIM000952	Bsv0100-00000952-RA	Cytosolic sulfotransferase 15 [Source:SWISS;Acc:Q8L5A7]	9	1.45817	1.71258	4.51904	0.335699	1.18672	2.1575	0.1044	0	0
953	TBIM000953	Bsv0100-00000953-RA	Cytosolic sulfotransferase 15 [Source:SWISS;Acc:Q8L5A7]	9	0.523248	0.679604	1.31438	0.100454	0	0	0	0	0
954	TBIM000954	Bsv0100-00000954-RA	Cytosolic sulfotransferase 13 [Source:SWISS;Acc:Q9ZPQ5]	9	0	0	0	0	0	0	0	0	0
955	TBIM000955	Bsv0100-00000955-RA	Cytosolic sulfotransferase 15 [Source:SWISS;Acc:Q8L5A7]	9	1.47539	0.932289	1.54149	1.12632	1.17996	1.61655	0.687987	3.94318	3.75762
956	TBIM000956	Bsv0100-00000956-RA	Cytosolic sulfotransferase 12 [Source:SWISS;Acc:P52839]	9	0	0	0	0	0	0	0	0	0
957	TBIM000957	Bsv0100-00000957-RA	-	9	0	0	0	0	0	0	0	0	0
958	TBIM000958	Bsv0100-00000958-RA	-	9	0	0	0	0	0	0	0	0	0
959	TBIM000959	Bsv0100-00000959-RA	Transcription factor bHLH25 [Source:SWISS;Acc:Q9T072]	9	0	0	0	0	0	0	0	0	0
960	TBIM000960	Bsv0100-00000960-RA	-	9	0	0	0	0	0	0	0	0	0
961	TBIM000961	Bsv0100-00000961-RA	Armadillo repeat-containing kinesin-like protein 3 [Source:SWISS;Acc:Q9FZ06]	9	0	0	0	0	0	0	0	0	0
962	TBIM000962	Bsv0100-00000962-RA	-	9	0	0	0	0	0	0	0	0	0
963	TBIM000963	Bsv0100-00000963-RA	-	9	0	0	0	0	0	0	0	0	0
964	TBIM000964	Bsv0100-00000964-RA	-	9	0	0	0	0	0	0	0	0	0
965	TBIM000965	Bsv0100-00000965-RA	-	9	0	0	0	0	0	0	0	0	0
966	TBIM000966	Bsv0100-00000966-RA	-	9	0	0	0	0	0	0	0	0	0
967	TBIM000967	Bsv0100-00000967-RA	-	9	0	0	0	0	0	0	0	0	0
968	TBIM000968	Bsv0100-00000968-RA	-	9	0	0	0	0	0	0	0	0	0
969	TBIM000969	Bsv0100-00000969-RA	-	9	0	0.143502	0	0	0	0	0.15885	0	0
970	TBIM000970	Bsv0100-00000970-RA	-	9	0	0.0927235	0	0	0.10781	0	0	0.0979338	0
971	TBIM000971	Bsv0100-00000971-RA	Phosphoenolpyruvate carboxykinase [ATP] [Source:SWISS;Acc:Q9T074]	9	4.82585	6.03396	7.41497	4.15718	5.62022	7.85301	9.58597	10.9183	7.88749
972	TBIM000972	Bsv0100-00000972-RA	Phosphoenolpyruvate carboxykinase [ATP] [Source:SWISS;Acc:Q9SLZ0]	9	2.28366	2.28287	3.55191	2.2755	2.33322	3.25731	3.10259	5.03903	3.52419
973	TBIM000973	Bsv0100-00000973-RA	Gibberellin 20 oxidase 2 [Source:SWISS;Acc:Q0JH50]	9	8.23274	7.94368	13.8287	17.4633	17.1397	11.6035	2.46246	2.91977	2.26445
974	TBIM000974	Bsv0100-00000974-RA	2'-deoxymugineic-acid 2'-dioxygenase [Source:SWISS;Acc:Q40062]	9	2.844	2.58331	4.70208	7.12851	7.61114	3.80524	0.548351	2.25455	1.84076
975	TBIM000975	Bsv0100-00000975-RA	-	9	0	0	0	0	0	0	0	0	0
976	TBIM000976	Bsv0100-00000976-RA	Protein TRANSPARENT TESTA GLABRA 1 [Source:SWISS;Acc:Q9XGN1]	9	11.5655	11.1456	11.0728	9.50549	8.21834	7.82903	8.13319	5.14782	6.06343
977	TBIM000977	Bsv0100-00000977-RA	Ocs element-binding factor 1 [Source:SWISS;Acc:P24068]	9	169.545	160.106	113.472	127.813	131.624	113.06	77.4105	73.5485	58.1929
978	TBIM000978	Bsv0100-00000978-RA	-	9	46.3044	73.3019	19.055	0	37.7244	22.2523	73.2886	0	27.3236
979	TBIM000979	Bsv0100-00000979-RA	-	9	0	0	0	0	0	0	0	0	0
980	TBIM000980	Bsv0100-00000980-RA	-	9	0	0	0	0	0	0	0	0	0
981	TBIM000981	Bsv0100-00000981-RA	Transcription factor TFIIIB component B'' [Source:SWISS;Acc:O94481]	9	11.5996	11.1769	14.0671	10.7204	10.4314	10.2439	7.74518	9.92948	7.65932
982	TBIM000982	Bsv0100-00000982-RA	-	9	0	0	0	0	0	0	0	0	0
983	TBIM000983	Bsv0100-00000983-RA	-	9	22.005	23.6761	30.7169	27.0019	23.8272	27.5041	23.2618	34.5664	34.106
984	TBIM000984	Bsv0100-00000984-RA	Acidic endochitinase SE2 [Source:SWISS;Acc:P36910]	9	2.4134	2.87933	3.07262	7.07711	7.80214	4.63436	4.0945	9.42961	7.91076
985	TBIM000985	Bsv0100-00000985-RA	Protein YLS9 [Source:SWISS;Acc:Q9SJ52]	9	13.8119	14.9616	12.7732	33.7228	23.6522	15.1476	67.1797	36.3862	32.9709
986	TBIM000986	Bsv0100-00000986-RA	-	9	0	0	0	0	0	0	0	0	0
987	TBIM000987	Bsv0100-00000987-RA	Two-component response regulator-like APRR5 [Source:SWISS;Acc:Q6LA42]	9	107.978	106.54	15.8597	134.632	140.289	14.7483	140.143	15.0277	15.1108
988	TBIM000988	Bsv0100-00000988-RA	-	9	1.91011	2.77278	2.17302	0	3.26759	2.51084	0	0	1.64948
989	TBIM000989	Bsv0100-00000989-RA	-	9	0	0	0	0	0	0	0	0	0
990	TBIM000990	Bsv0100-00000990-RA	-	9	0	0	0	0	0	0	0	0	0
991	TBIM000991	Bsv0100-00000991-RA	-	9	0	0	0	0	0	0	0	0	0
992	TBIM000992	Bsv0100-00000992-RA	-	9	0	0	0	0	0	0	0	0	0
993	TBIM000993	Bsv0100-00000993-RA	-	9	0	0	0	0	0	0	0	0	0
994	TBIM000994	Bsv0100-00001034-RA	Serine/threonine-protein kinase AFC2 [Source:SWISS;Acc:P51567]	9	137.031	131.332	118.869	121.477	119.498	98.4569	85.0441	71.3587	64.385
995	TBIM000995	Bsv0100-00001035-RA	Quinolinate synthase, chloroplastic [Source:SWISS;Acc:Q9FGS4]	9	4.75554	5.39562	17.1395	11.2468	9.93978	29.1141	27.7377	44.2459	41.784
996	TBIM000996	Bsv0100-00001036-RA	Manganese-dependent ADP-ribose/CDP-alcohol diphosphatase [Source:SWISS;Acc:Q9SB68]	9	6.79402	6.07603	5.55713	9.57007	7.52954	6.74653	13.0296	7.39854	6.44033
997	TBIM000997	Bsv0100-00001037-RA	High-affinity nitrate transporter 3.1 [Source:SWISS;Acc:Q9FGS5]	9	0.0731388	0.0705682	0	0	0.08074	0	0.15722	0	0
998	TBIM000998	Bsv0100-00001038-RA	Asparagine--tRNA ligase, cytoplasmic 2 [Source:SWISS;Acc:Q9SW95]	9	1.17001	1.2915	1.18816	2.06905	1.94337	1.80195	0.409441	1.50241	1.69044
999	TBIM000999	Bsv0100-00001039-RA	Cysteine-rich repeat secretory protein 55 [Source:SWISS;Acc:Q9LV60]	9	0	0	0	0	0	0	1.58383	0	0
1000	TBIM001000	Bsv0100-00001040-RA	Ras-related protein RABA5e [Source:SWISS;Acc:P19892]	9	9.02251	8.52209	11.0608	6.82176	6.36165	6.66518	3.14695	6.32384	7.83175
1001	TBIM001001	Bsv0100-00001041-RA	-	9	7.41467	7.09862	9.76487	7.39158	7.4228	6.70874	7.13475	7.58654	6.03259
1002	TBIM001002	Bsv0100-00001042-RA	None [Source:SWISS;Acc:Q9LSE7]	9	15.224	16.9673	25.3378	18.608	14.6669	23.927	8.09489	15.9368	17.7628
1003	TBIM001003	Bsv0100-00001043-RA	None [Source:SWISS;Acc:Q9SV71]	9	17.0538	20.4327	19.6105	12.6681	14.6375	14.5925	0.965583	5.85232	3.76126
1004	TBIM001004	Bsv0100-00001044-RA	Probable mitochondrial import inner membrane translocase subunit TIM21 [Source:SWISS;Acc:Q1G3L1]	9	22.6532	26.6358	29.3931	25.6363	23.8085	26.8106	18.5697	19.9005	16.805
1005	TBIM001005	Bsv0100-00001045-RA	-	9	48.1592	54.9576	56.4328	50.6315	54.481	50.7644	34.3889	39.4128	26.903
1006	TBIM001006	Bsv0100-00001046-RA	-	9	0	0	0	0	0	0	0	0	0
1007	TBIM001007	Bsv0100-00001047-RA	Putative ribonuclease H protein At1g65750 [Source:SWISS;Acc:P0C2F6]	9	0	0	0	0	0	0	0	0	0
1008	TBIM001008	Bsv0100-00001048-RA	-	9	0	0	0	0	0	0	0	0	0
1009	TBIM001009	Bsv0100-00001049-RA	Serine/threonine-protein kinase OXI1 [Source:SWISS;Acc:Q9LSF1]	9	1.19119	1.19579	1.17184	1.29958	1.36941	0.951102	0.932457	0.496572	0.614918
1010	TBIM001010	Bsv0100-00001050-RA	Putative pentatricopeptide repeat-containing protein At3g15130 [Source:SWISS;Acc:P0C898]	9	4.65778	5.44548	3.48735	4.24309	3.61861	2.22388	2.44686	2.88278	1.24146
1011	TBIM001011	Bsv0100-00001051-RA	Uncharacterized HIT-like protein BB_0379 [Source:SWISS;Acc:P94252]	9	15.6724	14.3168	18.6148	17.789	17.9024	20.3815	23.498	32.7253	27.1072
1012	TBIM001012	Bsv0100-00001052-RA	E3 ubiquitin-protein ligase CHIP [Source:SWISS;Acc:Q9SRS9]	9	3.41577	5.21611	2.09076	3.59337	3.27092	2.85482	2.57333	1.42671	1.3215
1013	TBIM001013	Bsv0100-00001053-RA	U-box domain-containing protein 9 [Source:SWISS;Acc:Q9SRT0]	9	24.2119	24.2036	11.0578	16.0099	15.6893	8.88011	30.4953	14.2117	13.0806
1014	TBIM001014	Bsv0100-00001054-RA	-	9	0	0	0	0	0	0	0	0	0
1015	TBIM001015	Bsv0100-00001055-RA	V-type proton ATPase subunit D [Source:SWISS;Acc:Q9XGM1]	9	92.4914	89.389	82.7563	76.5031	67.0883	69.6839	53.2429	59.5656	42.7406
1016	TBIM001016	Bsv0100-00001056-RA	Germin-like protein 11-1 [Source:SWISS;Acc:Q2R352]	9	17.1039	15.9948	15.4102	17.6748	18.5904	16.5142	10.2039	10.3907	9.69565
1017	TBIM001017	Bsv0100-00001057-RA	-	9	0	0	0	0	0	0	0	0	0
1018	TBIM001018	Bsv0100-00001058-RA	-	9	0	0	0	0	0	0	0	0	0
1019	TBIM001019	Bsv0100-00001059-RA	-	9	68.8969	69.1484	14.25	59.8672	58.1447	13.1397	154.902	22.2134	15.751
1020	TBIM001020	Bsv0100-00001060-RA	Abscisic acid receptor PYL2 [Source:SWISS;Acc:O80992]	9	5.00723	4.37929	3.23973	6.7992	6.07165	7.66459	4.10361	2.83641	3.49594
1021	TBIM001021	Bsv0100-00001061-RA	-	9	0	0	0	0	0	0	0	0	0
1022	TBIM001022	Bsv0100-00001062-RA	-	9	0	0	0	0	0	0	0	0	0
1023	TBIM001023	Bsv0100-00001063-RA	Retrovirus-related Pol polyprotein from transposon TNT 1-94 [Source:SWISS;Acc:P10978]	9	0	0	0	0	0	0	0	0	0
1024	TBIM001024	Bsv0100-00001064-RA	Transcription factor bHLH78 [Source:SWISS;Acc:Q9FJL4]	9	0.385095	0.158978	0.150947	0.533148	0.508913	0.126222	5.16355	0.585669	0.881835
1025	TBIM001025	Bsv0100-00001065-RA	-	9	0	0	0	0	0	0	0	0	0
1026	TBIM001026	Bsv0100-00001066-RA	-	9	0	0	0	0	0	0	0	0	0
1027	TBIM001027	Bsv0100-00001067-RA	-	9	0	0	0	0	0	0	0	0	0
1028	TBIM001028	Bsv0100-00001068-RA	-	9	0	0	0	0	0	0	0	0	0
1029	TBIM001029	Bsv0100-00001069-RA	-	9	0	0	0	0	0	0	0	0	0
1030	TBIM001030	Bsv0100-00001070-RA	-	9	0	0	0	0	0	0	0	0	0
1031	TBIM001031	Bsv0100-00001071-RA	-	9	0	0	0	0	0	0	0	0	0
1032	TBIM001032	Bsv0100-00001072-RA	-	9	0.199593	0.376373	0.227813	0.229243	0.661274	1.05283	0	0.609353	1.09774
1033	TBIM001033	Bsv0100-00001073-RA	-	9	0	0	0	0	0	0	0	0	0
1034	TBIM001034	Bsv0100-00001074-RA	Probable xyloglucan glycosyltransferase 6 [Source:SWISS;Acc:Q9SRT3]	9	10.8698	10.2279	11.5811	9.67756	10.331	8.20107	6.93229	5.81071	5.50672
1035	TBIM001035	Bsv0100-00001075-RA	Peptidyl-prolyl cis-trans isomerase FKBP62 [Source:SWISS;Acc:Q38931]	9	71.7684	65.1328	57.5269	56.4436	59.7014	48.5873	30.2408	21.5326	25.2873
1036	TBIM001036	Bsv0100-00001076-RA	Peptidyl-prolyl cis-trans isomerase FKBP15-1 [Source:SWISS;Acc:Q38935]	9	49.6784	50.1805	41.1976	45.5376	38.2143	33.5775	16.0588	12.4459	12.3208
1037	TBIM001037	Bsv0100-00001077-RA	Probable receptor protein kinase TMK1 [Source:SWISS;Acc:P43298]	9	0	0	0	0	0	0	0	0	0
1038	TBIM001038	Bsv0100-00001078-RA	Pentatricopeptide repeat-containing protein At3g25210, mitochondrial [Source:SWISS;Acc:Q9LSF5]	9	0	0	0	0	0.671425	0	0	0	0
1039	TBIM001039	Bsv0100-00001079-RA	Pentatricopeptide repeat-containing protein At3g25210, mitochondrial [Source:SWISS;Acc:Q9LSF5]	9	0	0.363548	0	0.435486	0	0	0	0	0
1040	TBIM001040	Bsv0100-00001080-RA	Probable glucan endo-1,3-beta-glucosidase A6 [Source:SWISS;Acc:Q06915]	9	17.2074	17.3824	23.7792	12.0242	9.25792	11.5126	4.32211	4.12434	3.56965
1041	TBIM001041	Bsv0100-00001081-RA	DEAD-box ATP-dependent RNA helicase 41 [Source:SWISS;Acc:Q3EBD3]	9	7.29793	7.58331	6.37542	5.81703	6.34347	4.55755	5.21582	4.29802	3.32286
1042	TBIM001042	Bsv0100-00001082-RA	-	9	6.02942	4.83531	2.5934	3.80201	4.15777	1.37112	59.0893	5.93802	6.63779
1043	TBIM001043	Bsv0100-00001083-RA	-	9	0	0	0.437451	0	0	0	0	0	1.28784
1044	TBIM001044	Bsv0100-00001084-RA	Quinone-oxidoreductase homolog, chloroplastic [Source:SWISS;Acc:Q8H0M1]	9	0.635797	0.660235	0.830539	0.320684	0.274004	0.461683	0.358479	0.43948	0.685645
1045	TBIM001045	Bsv0100-00001085-RA	None [Source:SWISS;Acc:Q940G0]	9	4.20267	7.07746	5.48046	2.20712	4.83626	4.61101	2.8415	1.20979	1.20133
1046	TBIM001046	Bsv0100-00001086-RA	Quinone-oxidoreductase homolog, chloroplastic [Source:SWISS;Acc:Q8H0M1]	9	88.3937	84.8568	86.3665	78.7125	79.6131	68.9757	69.2775	64.6745	50.0844
1047	TBIM001047	Bsv0100-00001087-RA	Serine/threonine-protein kinase MHK [Source:SWISS;Acc:P43294]	9	20.987	21.1911	17.4638	20.9433	19.7558	16.8411	18.5371	14.6069	13.3073
1048	TBIM001048	Bsv0100-00001088-RA	Copia protein [Source:SWISS;Acc:P04146]	9	11.4216	12.0491	10.9396	11.1492	10.1613	12.3496	7.97305	9.43335	8.93591
1049	TBIM001049	Bsv0100-00001089-RA	-	9	18.6045	20.0794	18.9826	19.8983	17.1833	17.2669	10.878	11.2434	9.77168
1050	TBIM001050	Bsv0100-00001090-RA	None [Source:SWISS;Acc:Q8VYU3]	9	16.2069	17.0686	18.2953	21.8288	21.0478	23.8276	43.1954	44.2142	42.9628
1051	TBIM001051	Bsv0100-00001091-RA	-	9	34.9673	40.9096	41.5039	44.3814	37.8307	38.1334	56.4916	43.649	34.5792
1052	TBIM001052	Bsv0100-00001092-RA	Cyclin-C1-2 [Source:SWISS;Acc:Q9FJK7]	9	15.7652	16.1228	14.0341	16.2735	14.1144	12.7533	9.30578	11.3294	15.0135
1053	TBIM001053	Bsv0100-00001093-RA	-	9	6.08143	6.58169	7.01155	6.25853	5.67644	6.20472	2.50099	3.02577	3.43999
1054	TBIM001054	Bsv0100-00001094-RA	Cytochrome P450 82G1 [Source:SWISS;Acc:Q9LSF8]	9	1.26793	1.25874	1.60799	2.64738	1.80758	1.7739	0.208891	0.22997	0
1055	TBIM001055	Bsv0100-00001095-RA	Anthocyanidin 3-O-glucosyltransferase [Source:SWISS;Acc:Q43716]	9	1.57844	1.05269	2.27061	1.1952	1.01602	1.41537	0.494315	1.73769	1.94181
1056	TBIM001056	Bsv0100-00001096-RA	Anthocyanidin 3-O-glucosyltransferase [Source:SWISS;Acc:Q43716]	9	1.17691	0.716146	1.05831	1.18616	1.13369	0.590355	0.123155	0.27865	0
1057	TBIM001057	Bsv0100-00001097-RA	Anthocyanidin 3-O-glucosyltransferase [Source:SWISS;Acc:Q43716]	9	1.71009	1.91778	3.91077	1.11096	0.265972	1.32538	0.260232	0.353233	0.472046
1058	TBIM001058	Bsv0100-00001098-RA	-	9	0	0	0	0	0	0	0	0	0
1059	TBIM001059	Bsv0100-00001099-RA	Adenylosuccinate lyase [Source:SWISS;Acc:Q9I0K9]	9	35.4505	35.1239	34.8533	34.5032	31.3937	35.7199	25.5512	23.53	21.7569
1060	TBIM001060	Bsv0100-00001100-RA	ER lumen protein retaining receptor [Source:SWISS;Acc:Q611C8]	9	0.12862	0	0	0	0	0	0	0	0
1061	TBIM001061	Bsv0100-00001101-RA	-	9	0	0	0	0	0	0	0	0	0
1062	TBIM001062	Bsv0100-00001102-RA	-	9	0	0	0	0	0	0	0	0	0
1063	TBIM001063	Bsv0100-00001103-RA	ER lumen protein retaining receptor [Source:SWISS;Acc:O76767]	9	72.6668	74.6359	51.1794	65.4646	71.3443	46.9731	32.3908	37.4241	31.0447
1064	TBIM001064	Bsv0100-00001104-RA	ER lumen protein retaining receptor [Source:SWISS;Acc:Q86JE5]	9	0	0	0	0	0	0	0	0	0
1065	TBIM001065	Bsv0100-00001105-RA	-	9	0	0	0	0	0	0	0	0	0
1066	TBIM001066	Bsv0100-00001106-RA	Ninja-family protein AFP3 [Source:SWISS;Acc:Q94F39]	9	2.20442	2.3695	4.94651	3.86852	4.35199	2.86801	0.256479	0.484573	0.424448
1067	TBIM001067	Bsv0100-00001107-RA	-	9	0	0	0	0	0	0	0	0	0
1068	TBIM001068	Bsv0100-00001108-RA	Disease resistance protein At4g27190 [Source:SWISS;Acc:Q9T048]	9	0	0	0	0	0	0	0	0	0
1069	TBIM001069	Bsv0100-00001109-RA	Putative G3BP-like protein [Source:SWISS;Acc:O94260]	9	32.2778	34.084	37.8934	29.3264	28.4364	24.5315	20.2756	16.5942	17.7964
1070	TBIM001070	Bsv0100-00001110-RA	Galacturonosyltransferase 8 [Source:SWISS;Acc:Q9LSG3]	9	64.0556	62.7907	81.1496	65.8054	62.8824	66.9586	38.4786	44.8048	43.7545
1071	TBIM001071	Bsv0100-00001111-RA	Fructokinase-2 [Source:SWISS;Acc:Q0J8G4]	9	0	0	0	0	0	0	0	0	0
1072	TBIM001072	Bsv0100-00001112-RA	-	9	3.97717	3.32861	5.16592	3.73043	3.35016	4.0625	0.739577	1.74698	2.61298
1073	TBIM001073	Bsv0100-00001113-RA	Wound-induced basic protein [Source:SWISS;Acc:Q09020]	9	88.2663	88.0959	85.9287	63.843	70.189	72.3435	37.1016	53.3135	46.5017
1074	TBIM001074	Bsv0100-00001114-RA	Ethylene-responsive transcription factor-like protein At4g13040 [Source:SWISS;Acc:Q56XP9]	9	7.84489	10.3335	8.63316	7.58026	7.11159	5.91483	0.253098	0.694583	0.496524
1075	TBIM001075	Bsv0100-00001115-RA	-	9	0	0	0	0	0	0	0	0	0
1076	TBIM001076	Bsv0100-00001116-RA	-	9	0	0	0	0	0	0	0	0	0
1077	TBIM001077	Bsv0100-00001117-RA	Fork head transcription factor 1 [Source:SWISS;Acc:O14270]	9	18.7822	13.2027	18.3378	12.65	13.9321	14.5362	9.90641	9.28633	11.6808
1078	TBIM001078	Bsv0100-00001118-RA	Retrovirus-related Pol polyprotein from transposon TNT 1-94 [Source:SWISS;Acc:P10978]	9	0	0	0	0	0	0	0	0	0
1079	TBIM001079	Bsv0100-00001119-RA	DNA-directed RNA polymerase subunit 10-like protein [Source:SWISS;Acc:Q9SYA6]	9	2.63161	1.04491	4.32285	1.01684	1.20891	0.879164	0.932501	0.441928	0
1080	TBIM001080	Bsv0100-00001120-RA	-	9	0	0	0	0	0	0	0	0	0
1081	TBIM001081	Bsv0100-00001121-RA	-	9	0	0	0	0	0	0	0	0	0
1082	TBIM001082	Bsv0100-00001122-RA	-	9	0	0	0	0	0	0	0	0	0.0607119
1083	TBIM001083	Bsv0100-00001165-RA	-	9	0	0	0	0	0	0	0	0	0
1084	TBIM001084	Bsv0100-00001166-RA	60S ribosomal protein L10 [Source:SWISS;Acc:Q40592]	9	0	0	0	0	0	0	0	0	0
1085	TBIM001085	Bsv0100-00001167-RA	Delta(14)-sterol reductase [Source:SWISS;Acc:Q9LDR4]	9	21.7104	20.2853	23.3299	20.1294	17.7701	17.8681	14.0272	13.6638	13.0287
1086	TBIM001086	Bsv0100-00001168-RA	-	9	0	0	0	0	0	0	0	0	0
1087	TBIM001087	Bsv0100-00001169-RA	-	9	0	0	0	0	0	0	0	0	0
1088	TBIM001088	Bsv0100-00001170-RA	Ribulose bisphosphate carboxylase large chain [Source:SWISS;Acc:P48682]	9	0	0	0	0	0	0	0	0	0
1089	TBIM001089	Bsv0100-00001171-RA	-	9	0	0	0	0	0	0	0	0	0
1090	TBIM001090	Bsv0100-00001172-RA	-	9	0	0	0	0	0	0	0	0	0
1091	TBIM001091	Bsv0100-00001173-RA	-	9	0	0	0	0	0	0	0	0	0
1092	TBIM001092	Bsv0100-00001174-RA	-	9	0	0	0	0	0	0	0	0	0
1093	TBIM001093	Bsv0100-00001175-RA	-	9	0	0	0	0	0	0	0	0	0
1094	TBIM001094	Bsv0100-00001176-RA	-	9	0	0	0	0	0	0	0	0	0
1095	TBIM001095	Bsv0100-00001177-RA	-	9	0	0	0	0	0	0	0	0	0
1096	TBIM001096	Bsv0100-00001178-RA	Protein ROS1 [Source:SWISS;Acc:Q9SJQ6]	9	50.9798	47.3372	51.2936	48.0839	48.5207	39.3313	22.5992	26.4809	24.9894
1097	TBIM001097	Bsv0100-00001179-RA	-	9	0	0	0	0	0	0	0	0	0
1098	TBIM001098	Bsv0100-00001180-RA	Serine/threonine-protein kinase CTR1 [Source:SWISS;Acc:Q05609]	9	9.61549	8.44592	10.7728	8.95916	10.3335	7.54367	6.11415	5.25676	5.44581
1099	TBIM001099	Bsv0100-00001181-RA	Serine/threonine-protein kinase CTR1 [Source:SWISS;Acc:Q05609]	9	9.42058	8.26158	9.81865	7.74737	8.68062	7.75021	6.26758	4.60167	5.48647
1100	TBIM001100	Bsv0100-00000994-RA	Protein OSB1, mitochondrial [Source:SWISS;Acc:Q9SX99]	9	15.4588	17.9259	16.7411	14.9959	15.4118	13.0687	12.2743	10.1779	8.4066
1101	TBIM001101	Bsv0100-00000995-RA	CST complex subunit CTC1 [Source:SWISS;Acc:D0EL35]	9	2.41389	1.98579	5.42621	1.48522	1.34112	1.7991	0.313534	0.604184	0.65096
1102	TBIM001102	Bsv0100-00000996-RA	-	9	26.475	22.3059	31.529	11.5922	13.0325	18.7132	3.89627	8.19783	9.70045
1103	TBIM001103	Bsv0100-00000997-RA	Probable LRR receptor-like serine/threonine-protein kinase At4g08850 [Source:SWISS;Acc:Q8VZG8]	9	0.0439608	0	0	0	0	0	0.0466864	0.043699	0
1104	TBIM001104	Bsv0100-00000998-RA	-	9	0	0	0	0	0	0	0	0	0
1105	TBIM001105	Bsv0100-00000999-RA	-	9	0	0	0	0	0.504399	0	0	0	0
1106	TBIM001106	Bsv0100-00001000-RA	Uroporphyrinogen-III synthase, chloroplastic [Source:SWISS;Acc:Q10QR9]	9	17.4846	16.6394	16.4641	19.1968	18.4195	19.6456	17.547	16.3853	17.1222
1107	TBIM001107	Bsv0100-00001001-RA	-	9	0.139735	0.0916354	0.0542539	0.111464	0.367281	0.24196	0.10176	0.0950561	0.0868016
1108	TBIM001108	Bsv0100-00001002-RA	-	9	20.8606	17.3208	20.2238	20.8468	19.5187	26.5913	16.1675	27.5733	22.7759
1109	TBIM001109	Bsv0100-00001003-RA	Cytochrome c oxidase assembly protein COX19 [Source:SWISS;Acc:P0CM86]	9	0	0	0	0	0	0	0	0	0
1110	TBIM001110	Bsv0100-00001004-RA	30S ribosomal protein S7, chloroplastic [Source:SWISS;Acc:Q9TM55]	9	0	0	0	0	0	0	0	0	0
1111	TBIM001111	Bsv0100-00001005-RA	30S ribosomal protein S12, chloroplastic [Source:SWISS;Acc:Q1KVX0]	9	0	0	0	0	0	0	0	0	0
1112	TBIM001112	Bsv0100-00001006-RA	-	9	0	0	0	0	0	0	0	0	0
1113	TBIM001113	Bsv0100-00001007-RA	-	9	0	0	0	0	0	0	0	0	0
1114	TBIM001114	Bsv0100-00001008-RA	Uncharacterized protein ycf68 [Source:SWISS;Acc:Q49KT9]	9	0	0	0	0	0	0	0	0	0
1115	TBIM001115	Bsv0100-00001009-RA	-	9	0	0	0	0	0	0	0	0	0
1116	TBIM001116	Bsv0100-00001010-RA	-	9	0	0	0	0	0	0	0	0	0
1117	TBIM001117	Bsv0100-00001011-RA	Putative membrane protein ycf1 [Source:SWISS;Acc:A4QLZ3]	9	0	0	0	0	0	0	0	0	0
1118	TBIM001118	Bsv0100-00001012-RA	-	9	0	0	0	0	0	0	0	0	0
1119	TBIM001119	Bsv0100-00001013-RA	NAD(P)H-quinone oxidoreductase subunit H, chloroplastic [Source:SWISS;Acc:Q06GL1]	9	0	0	0	0	0	0	0	0	0
1120	TBIM001120	Bsv0100-00001014-RA	NAD(P)H-quinone oxidoreductase subunit H, chloroplastic [Source:SWISS;Acc:Q9M3I5]	9	0	0	0	0	0	0	0	0	0
1121	TBIM001121	Bsv0100-00001015-RA	NAD(P)H-quinone oxidoreductase subunit I, chloroplastic [Source:SWISS;Acc:Q8HVU7]	9	0	0	0	0	0	0	0	0	0
1122	TBIM001122	Bsv0100-00001016-RA	NAD(P)H-quinone oxidoreductase subunit 6, chloroplastic [Source:SWISS;Acc:Q9M3I8]	9	0	0	0	0	0	0	0	0	0
1123	TBIM001123	Bsv0100-00001017-RA	Dipeptidyl peptidase family member 6 [Source:SWISS;Acc:P34422]	9	28.662	28.1109	28.7665	25.0567	24.0673	21.3734	13.9043	15.4811	13.5005
1124	TBIM001124	Bsv0100-00001018-RA	Acyl-CoA-binding domain-containing protein 3 [Source:SWISS;Acc:Q9STX1]	9	7.79011	8.90533	11.4302	9.26727	9.29515	11.169	8.03632	11.9269	17.0421
1125	TBIM001125	Bsv0100-00001019-RA	-	9	0.179813	0.243992	0.487003	0	0.0929346	0	0	0.0894217	0.331444
1126	TBIM001126	Bsv0100-00001020-RA	Putative AC transposase [Source:SWISS;Acc:P08770]	9	0.198047	0.752555	1.0757	0.441104	0	0.253791	0.208704	0.196582	0
1127	TBIM001127	Bsv0100-00001021-RA	Putative ribonuclease H protein At1g65750 [Source:SWISS;Acc:P0C2F6]	9	0	0	0	0	0	0	0	0	0
1128	TBIM001128	Bsv0100-00001022-RA	-	9	0	0	0	0	0	0	0	0	0
1129	TBIM001129	Bsv0100-00001023-RA	-	9	0	0	0.532316	0.273803	0	0.307212	0	0	0
1130	TBIM001130	Bsv0100-00001024-RA	-	9	0.0680027	0.224557	0.161128	0.0384605	0.184531	0.0450386	0.0343917	0.0327288	0.0637197
1131	TBIM001131	Bsv0100-00001025-RA	Putative ribonuclease H protein At1g65750 [Source:SWISS;Acc:P0C2F6]	9	0.145612	0.074346	0.105239	0.0298058	0.227118	0.0343689	0.0398955	0.129083	0.102287
1132	TBIM001132	Bsv0100-00001026-RA	Subtilisin-like protease [Source:SWISS;Acc:O65351]	9	1.34133	1.1943	2.43595	0.463419	0.917124	0.855616	0.670212	0.7949	0.699777
1133	TBIM001133	Bsv0100-00001027-RA	Subtilisin-like protease [Source:SWISS;Acc:O65351]	9	6.37952	5.87258	6.81711	2.95587	3.65746	2.15445	3.17432	1.45708	2.13943
1134	TBIM001134	Bsv0100-00001028-RA	-	9	14.1748	14.6175	16.9441	13.4889	12.9129	14.681	11.2624	11.1757	13.5609
1135	TBIM001135	Bsv0100-00001029-RA	Arginine N-methyltransferase 2 [Source:SWISS;Acc:Q4X1R1]	9	9.07635	8.90297	10.7739	8.46658	7.30773	6.18961	3.029	2.85509	2.69851
1136	TBIM001136	Bsv0100-00001030-RA	-	9	0	0	0	0	0	0	0	0	0
1137	TBIM001137	Bsv0100-00001031-RA	-	9	0	0	0	0	0	0	0	0	0
1138	TBIM001138	Bsv0100-00001032-RA	Putative ribonuclease H protein At1g65750 [Source:SWISS;Acc:P0C2F6]	9	0	0	0	0	0	0	0	0	0
1139	TBIM001139	Bsv0100-00001033-RA	Tetratricopeptide repeat protein 1 [Source:SWISS;Acc:Q99614]	9	0	0	0	0	0	0	0	0	0
1140	TBIM001140	Bsv0100-00001123-RA	-	9	0	0	0	0	0	0	0	0	0
1141	TBIM001141	Bsv0100-00001124-RA	-	9	0	0	0	0	0	0	0	0	0
1142	TBIM001142	Bsv0100-00001125-RA	Glucuronoxylan 4-O-methyltransferase 1 [Source:SWISS;Acc:Q6NMK1]	9	4.58572	4.31559	4.60043	3.38213	4.57323	3.66379	3.74979	2.04203	1.84234
1143	TBIM001143	Bsv0100-00001126-RA	Glucuronoxylan 4-O-methyltransferase 2 [Source:SWISS;Acc:Q9T0F7]	9	0	0	0	0.140556	0.134165	0	0	0	0.243429
1144	TBIM001144	Bsv0100-00001127-RA	-	9	0	0	0	0	0	0	0	0	0
1145	TBIM001145	Bsv0100-00001128-RA	Putative AC transposase [Source:SWISS;Acc:P08770]	9	0.0527325	0.050751	0	0	0	0	0	0	0
1146	TBIM001146	Bsv0100-00001129-RA	-	9	0	0	0	0	0	0	0	0	0
1147	TBIM001147	Bsv0100-00001130-RA	-	9	0	0	0	0	0	0	0	0	0
1148	TBIM001148	Bsv0100-00001131-RA	Glucuronoxylan 4-O-methyltransferase 2 [Source:SWISS;Acc:Q9T0F7]	9	121.647	124.58	98.4527	127.117	129.102	75.4635	58.3954	22.8881	19.5805
1149	TBIM001149	Bsv0100-00001132-RA	-	9	58.766	59.2657	58.9513	58.8956	58.2317	73.3654	68.9262	82.2232	64.4377
1150	TBIM001150	Bsv0100-00001133-RA	Glutamyl-tRNA(Gln) amidotransferase subunit B, chloroplastic/mitochondrial [Source:SWISS;Acc:B9SQR9]	9	0	0	0	0	0	0	0	0	0
1151	TBIM001151	Bsv0100-00001134-RA	-	9	0.0237987	0.0228816	0.111032	0.0548278	0.104988	0.0630523	0.0253856	0.0717351	0
1152	TBIM001152	Bsv0100-00001135-RA	G-type lectin S-receptor-like serine/threonine-protein kinase SD2-5 [Source:SWISS;Acc:Q8RWZ5]	9	0	1.43762	0	0	0	0	0	0	0
1153	TBIM001153	Bsv0100-00001136-RA	Alpha-ketoglutarate-dependent dioxygenase alkB [Source:SWISS;Acc:Q9SA98]	9	10.4167	10.8215	10.5051	8.30857	9.70247	9.32782	7.15185	6.51417	4.32156
1154	TBIM001154	Bsv0100-00001137-RA	-	9	72.594	60.7279	59.0653	89.4775	103.855	96.6856	267.678	224.773	209.578
1155	TBIM001155	Bsv0100-00001138-RA	-	9	0	0	0	0	0	0	0	0	0
1156	TBIM001156	Bsv0100-00001139-RA	-	9	0	0	0	0	0	0	0	0	0
1157	TBIM001157	Bsv0100-00001140-RA	-	9	0	0	0	0	0	0	0	0	0
1158	TBIM001158	Bsv0100-00001141-RA	Photosystem II D2 protein [Source:SWISS;Acc:P48184]	9	0	0	0	0	0	0	0	0	0
1159	TBIM001159	Bsv0100-00001142-RA	None [Source:SWISS;Acc:Q9M2N5]	9	0	0	0	0	0	0	0	0	0
1160	TBIM001160	Bsv0100-00001143-RA	F-box protein At1g67340 [Source:SWISS;Acc:Q9FYF9]	9	34.6018	35.261	29.7205	32.4959	33.409	25.1113	36.6829	31.8347	30.0683
1161	TBIM001161	Bsv0100-00001144-RA	REF/SRPP-like protein At1g67360 [Source:SWISS;Acc:Q9FYF7]	9	110.225	113.628	112.861	99.5512	91.3445	87.1211	88.1341	71.9516	66.0301
1162	TBIM001162	Bsv0100-00001145-RA	-	9	0	0	0	0	0	0	0	0	0
1163	TBIM001163	Bsv0100-00001146-RA	CTD small phosphatase-like protein 2 [Source:SWISS;Acc:Q54GB2]	9	19.6224	17.4936	23.551	14.5997	15.505	14.5663	14.5479	13.6108	13.9837
1164	TBIM001164	Bsv0100-00001147-RA	Imidazoleglycerol-phosphate dehydratase [Source:SWISS;Acc:Q43072]	9	55.3816	57.38	47.162	59.9395	55.2677	50.7423	50.4618	51.7978	46.2666
1165	TBIM001165	Bsv0100-00001148-RA	Inositol-tetrakisphosphate 1-kinase 1 [Source:SWISS;Acc:Q84Y01]	9	1.11867	0.81503	1.69973	2.55441	2.59945	3.18156	6.49264	5.84071	5.15907
1166	TBIM001166	Bsv0100-00001149-RA	Inositol-tetrakisphosphate 1-kinase 1 [Source:SWISS;Acc:Q84Y01]	9	1.64666	1.13991	2.1443	2.40099	2.3639	4.14384	6.46902	5.8418	4.17117
1167	TBIM001167	Bsv0100-00001150-RA	Cytochrome P450 78A5 [Source:SWISS;Acc:Q9LMX7]	9	0.298434	0.412549	0.803451	0.217148	0.177058	0.28542	0.0553501	0.160461	0.0975573
1168	TBIM001168	Bsv0100-00001151-RA	-	9	0	0.0275907	0	0	0.0317553	0	0	0	0
1169	TBIM001169	Bsv0100-00001152-RA	Protein BPS1, chloroplastic [Source:SWISS;Acc:Q9LMM6]	9	0.173912	0	0	0	0	0	0	0	0
1170	TBIM001170	Bsv0100-00001153-RA	Calcineurin B-like protein 4 [Source:SWISS;Acc:O81223]	9	0	0	0	0	0	0	0	0	0
1171	TBIM001171	Bsv0100-00001154-RA	-	9	3.3671	4.92166	6.80557	1.33086	2.06447	2.47052	1.20378	1.57362	0.716874
1172	TBIM001172	Bsv0100-00001155-RA	65-kDa microtubule-associated protein 8 [Source:SWISS;Acc:Q9C7G0]	9	8.27091	8.10189	12.7234	11.4009	10.6518	12.5052	11.913	14.311	13.7325
1173	TBIM001173	Bsv0100-00001156-RA	-	9	13.7061	13.7335	12.8414	10.2801	11.3275	10.4071	7.72471	6.12846	4.99878
1174	TBIM001174	Bsv0100-00001157-RA	-	9	0	0	0	0	0	0	0	0	0
1175	TBIM001175	Bsv0100-00001158-RA	-	9	0	0	0	0	0.141746	0	0	0	0
1176	TBIM001176	Bsv0100-00001159-RA	ELMO domain-containing protein A [Source:SWISS;Acc:Q54YW1]	9	2.96202	2.70226	4.52571	1.72891	0.89635	2.12868	0.304769	0.633506	0.1029
1177	TBIM001177	Bsv0100-00001160-RA	Flavonoid 3',5'-methyltransferase [Source:SWISS;Acc:C7AE94]	9	0	0	0	0	0	0	0	0	0
1178	TBIM001178	Bsv0100-00001161-RA	Putative caffeoyl-CoA O-methyltransferase At1g67980 [Source:SWISS;Acc:Q9C9W3]	9	0	0	0	0	0	0	0	0	0
1179	TBIM001179	Bsv0100-00001162-RA	Disease resistance protein RGA2 [Source:SWISS;Acc:Q7XBQ9]	9	0	0	0	0	0	0	0	0	0
1180	TBIM001180	Bsv0100-00001163-RA	-	9	0	0	0	0	0	0	0	0	0
1181	TBIM001181	Bsv0100-00001164-RA	Caffeoyl-CoA O-methyltransferase [Source:SWISS;Acc:P93711]	9	1.5859	1.16225	0.515845	0.882588	0.631504	0.595886	0.137073	0.128414	0.109734
1182	TBIM001182	Bsv0100-00001182-RA	-	9	0	0	0	0	0	0	0	0	0
1183	TBIM001183	Bsv0100-00001183-RA	-	9	0	0.106129	0	0	0	0	0	0	0
1184	TBIM001184	Bsv0100-00001184-RA	MLP-like protein 34 [Source:SWISS;Acc:Q9SSK7]	9	6.26713	6.5284	8.34012	13.7105	14.8304	26.0059	41.1931	47.1651	38.904
1185	TBIM001185	Bsv0100-00001185-RA	-	9	0.341632	0.575437	1.19346	0	0.375176	0.67398	0	0.082903	0
1186	TBIM001186	Bsv0100-00001186-RA	-	9	0	0	0	0	0	0	0	0	0
1187	TBIM001187	Bsv0100-00001187-RA	-	9	0	0	0	0	0	0	0	0	0
1188	TBIM001188	Bsv0100-00001188-RA	-	9	0.189658	0.0906398	1.30299	0.215307	0.309912	0.876476	1.3828	5.64708	5.67126
1189	TBIM001189	Bsv0100-00001189-RA	Probable ribonuclease P/MRP protein subunit POP5 [Source:SWISS;Acc:Q6AWV1]	9	15.7726	13.6326	14.8635	11.3038	13.9816	11.2612	12.0939	8.03702	6.53918
1190	TBIM001190	Bsv0100-00001190-RA	-	9	0	0	0	0	0	0	0	0	0
1191	TBIM001191	Bsv0100-00001191-RA	-	9	0	0	0	0	0	0	0	0	0
1192	TBIM001192	Bsv0100-00001192-RA	-	9	145.896	135.793	101.216	110.49	113.484	42.8395	46.1843	18.2483	18.5749
1193	TBIM001193	Bsv0100-00001193-RA	Pathogenesis-related protein 5 [Source:SWISS;Acc:P28493]	9	0.1408	0.0438314	0.154069	0.420793	0.742344	0.423108	0.0954351	0.278794	0.178076
1194	TBIM001194	Bsv0100-00001194-RA	DNA-binding protein BIN4 [Source:SWISS;Acc:Q9FLU1]	9	11.0229	10.1536	11.688	7.77469	7.61357	6.54605	4.49111	4.48872	3.96209
1195	TBIM001195	Bsv0100-00001195-RA	Uncharacterized protein At5g43822 [Source:SWISS;Acc:Q6NPG7]	9	9.91836	9.06447	9.59594	8.45811	8.13998	7.49081	6.95376	5.19521	4.27538
1196	TBIM001196	Bsv0100-00001196-RA	-	9	0.0472272	0.226132	0.139693	0.248988	0.130924	0.249833	0.0731587	0.140255	0
1197	TBIM001197	Bsv0100-00001197-RA	-	9	0	0	0	0	0	0	0	0	0
1198	TBIM001198	Bsv0100-00001198-RA	-	9	0	0	0.0590817	0	0	0	0	0	0
1199	TBIM001199	Bsv0100-00001199-RA	-	9	121	131.95	122.727	126.273	120.42	135.607	84.3266	114.293	83.7574
1200	TBIM001200	Bsv0100-00001200-RA	-	9	0	0	0	0	0	0	0	0	0
1201	TBIM001201	Bsv0100-00001201-RA	-	9	32.8505	27.3712	25.5373	47.7627	45.5007	44.6353	20.6634	64.9705	49.8438
1202	TBIM001202	Bsv0100-00001202-RA	None [Source:SWISS;Acc:F4I532]	9	3.96262	3.21417	3.28456	8.59364	9.53541	8.33109	3.26202	14.3454	12.328
1203	TBIM001203	Bsv0100-00001203-RA	-	9	0	0	0	0	0	0	0	0	0
1204	TBIM001204	Bsv0100-00001204-RA	-	9	10.9231	8.26029	7.42433	8.49707	9.72215	7.74742	9.0249	12.2719	7.37513
1205	TBIM001205	Bsv0100-00001205-RA	Autophagy-related protein 13 [Source:SWISS;Acc:Q6C315]	9	3.21869	3.56461	4.36115	3.72472	3.28759	3.6336	3.36506	3.16853	4.44365
1206	TBIM001206	Bsv0100-00001206-RA	20 kDa chaperonin, chloroplastic [Source:SWISS;Acc:Q02073]	9	0	0	0	0	0	0	0	0	0
1207	TBIM001207	Bsv0100-00001207-RA	Zinc finger with UFM1-specific peptidase domain protein [Source:SWISS;Acc:Q5U2S3]	9	7.79755	7.41795	7.75547	4.98603	5.64721	5.58106	4.53269	4.91935	5.15419
1208	TBIM001208	Bsv0100-00001208-RA	Disease resistance RPP8-like protein 3 [Source:SWISS;Acc:Q9FJB5]	9	0.94883	0.951967	1.69757	0.799694	0.612442	0.7565	0.471065	0.842639	0.895097
1209	TBIM001209	Bsv0100-00001209-RA	Disease resistance RPP8-like protein 3 [Source:SWISS;Acc:Q9FJB5]	9	0.731513	0.654275	0.97077	0.611771	0.675635	0.381289	0.311017	0.516594	0.597088
1210	TBIM001210	Bsv0100-00001210-RA	-	9	2.69311	2.36665	2.06272	1.81426	2.09139	2.31752	1.56694	2.12179	2.85522
1211	TBIM001211	Bsv0100-00001211-RA	Delta(7)-sterol-C5(6)-desaturase [Source:SWISS;Acc:Q9ZT29]	9	0	0	0	0	0	0.194365	0.0782423	0.365405	0.244338
1212	TBIM001212	Bsv0100-00001212-RA	None [Source:SWISS;Acc:Q6WUC2]	9	0.21094	0.0671164	0.165099	0.324901	0.466006	0.467301	0.146921	0.207466	0.243467
1213	TBIM001213	Bsv0100-00001213-RA	None [Source:SWISS;Acc:Q6WUC2]	9	1.15959	1.09597	0.861404	0	0.418506	0	0	0	0
1214	TBIM001214	Bsv0100-00001214-RA	None [Source:SWISS;Acc:Q8W4P8]	9	36.4645	37.2122	29.2938	34.0635	30.9238	15.0544	4.87275	3.39113	2.87943
1215	TBIM001215	Bsv0100-00001215-RA	Pathogenesis-related protein 1 [Source:SWISS;Acc:P33154]	9	0	0	0	0	0.111437	0.0699985	0	0.10431	0
1216	TBIM001216	Bsv0100-00001216-RA	-	9	0	0	0	0	0	0	0	0	0
1217	TBIM001217	Bsv0100-00001217-RA	-	9	0	0	0	0	0	0	0	0	0
1218	TBIM001218	Bsv0100-00001218-RA	-	9	0	0	0	0	0	0	0	0	0
1219	TBIM001219	Bsv0100-00001219-RA	Protein FAR1-RELATED SEQUENCE 5 [Source:SWISS;Acc:Q9SZL8]	9	0.0126853	0.011688	0.0140453	0	0	0	0.0126021	0	0
1220	TBIM001220	Bsv0100-00001220-RA	-	9	0	0	0	0	0	0	0	0	0
1221	TBIM001221	Bsv0100-00001221-RA	Probable glycosyltransferase At5g03795 [Source:SWISS;Acc:Q9FFN2]	9	0	0	0	0	0	0	0	0	0
1222	TBIM001222	Bsv0100-00001222-RA	Uncharacterized protein ORF91 [Source:SWISS;Acc:Q3BAI2]	9	0	0	0	0	0	0	0	0	0
1223	TBIM001223	Bsv0100-00001223-RA	-	9	0	0	0	0	0	0	0	0	0
1224	TBIM001224	Bsv0100-00001224-RA	None [Source:SWISS;Acc:F4KFS7]	9	0.0646317	0	0	0	0	0	0	0.0649343	0
1225	TBIM001225	Bsv0100-00001225-RA	Sphingoid long-chain bases kinase 1 [Source:SWISS;Acc:Q9LRB0]	9	19.7786	18.3556	21.474	16.9237	17.1281	16.6761	12.8314	14.6012	14.0916
1226	TBIM001226	Bsv0100-00001226-RA	-	9	0	0	0	0	0.0663171	0	0	0	0
1227	TBIM001227	Bsv0100-00001227-RA	-	9	0	0	0	0	0	0	0	0	0
1228	TBIM001228	Bsv0100-00001228-RA	-	9	16.5936	14.9968	12.9353	12.5942	13.9158	9.64336	9.63125	7.8313	6.79456
1229	TBIM001229	Bsv0100-00001229-RA	-	9	0	0	0	0	0	0	0	0	0
1230	TBIM001230	Bsv0100-00001230-RA	Eukaryotic translation initiation factor 5B [Source:SWISS;Acc:Q10251]	9	33.3418	32.4429	32.1381	28.7123	40.7053	33.5257	20.7421	26.9341	30.6004
1231	TBIM001231	Bsv0100-00001231-RA	Disease resistance protein RPP8 [Source:SWISS;Acc:Q8W4J9]	9	2.27088	2.19818	2.30479	1.01811	1.17101	1.21527	6.89538	7.39979	7.33928
1232	TBIM001232	Bsv0100-00001232-RA	-	9	0	0	0	0	0	0	0	0	0
1233	TBIM001233	Bsv0100-00001233-RA	-	9	0	0	0	0	0	0	0	0	0
1234	TBIM001234	Bsv0100-00001234-RA	UPF0481 protein At3g47200 [Source:SWISS;Acc:Q9SD53]	9	0.552575	1.12158	0.635434	0	0.260523	0.209199	0	0	0
1235	TBIM001235	Bsv0100-00001235-RA	-	9	0	0	0	0.496072	0	0	0	0	0
1236	TBIM001236	Bsv0100-00001236-RA	-	9	0	0	0	0	0	0	0	0	0
1237	TBIM001237	Bsv0100-00001302-RA	None [Source:SWISS;Acc:Q9SW48]	9	0.206162	0.595155	0.721169	0	0.151294	0.090333	0.0715003	0	0.116245
1238	TBIM001238	Bsv0100-00001303-RA	-	9	0	0	0.0331794	0.0323866	0	0	0	0	0
1239	TBIM001239	Bsv0100-00001304-RA	-	9	0	0	0	0	0	0	0	0	0
1240	TBIM001240	Bsv0100-00001305-RA	-	9	0	0	0	0	0	0	0	0	0
1241	TBIM001241	Bsv0100-00001306-RA	-	9	0	0	0	0	0	0	0	0	0
1242	TBIM001242	Bsv0100-00001307-RA	Ribulose-phosphate 3-epimerase, cytoplasmic isoform [Source:SWISS;Acc:Q9SE42]	9	0	0	0	0	0	0	0	0	0
1243	TBIM001243	Bsv0100-00001308-RA	Homeotic protein knotted-1 [Source:SWISS;Acc:Q41330]	9	4.39199	4.77958	9.95402	0.268162	0.621147	0.495429	0.0494941	0.0925725	0.158877
1244	TBIM001244	Bsv0100-00001309-RA	Homeobox protein knotted-1-like 2 [Source:SWISS;Acc:O04135]	9	5.16097	8.55075	14.3762	0.256994	0.244106	0.487511	0.157084	0.152933	0
1245	TBIM001245	Bsv0100-00001310-RA	1-aminocyclopropane-1-carboxylate oxidase 5 [Source:SWISS;Acc:Q0WPW4]	9	0	0	0	0	0	0	0	0	0
1246	TBIM001246	Bsv0100-00001311-RA	-	9	0	0	0	0	0	0	0	0	0
1247	TBIM001247	Bsv0100-00001312-RA	-	9	0	0	0	0	0	0	0	0	0
1248	TBIM001248	Bsv0100-00001313-RA	-	9	0	0.109952	0	0	0	0	0	0	0
1249	TBIM001249	Bsv0100-00001314-RA	None [Source:SWISS;Acc:B9FJG3]	9	0.18694	0	0	0	0.104831	0	0	0	0
1250	TBIM001250	Bsv0100-00001315-RA	-	9	0	0	0	0	0	0	0	0	0
1251	TBIM001251	Bsv0100-00001316-RA	Branched-chain-amino-acid aminotransferase 2, chloroplastic [Source:SWISS;Acc:Q9M439]	9	28.4123	32.2828	25.4847	16.1564	13.5508	10.4658	1.06254	0.843979	0.680447
1252	TBIM001252	Bsv0100-00001317-RA	-	9	0.625227	0.603835	0.842671	0.0672175	0.151437	0.0387416	0	0	0
1253	TBIM001253	Bsv0100-00001318-RA	Histidine-containing phosphotransfer protein 2 [Source:SWISS;Acc:Q9ZNV8]	9	4.56766	2.12044	3.28716	3.55242	1.87504	1.11748	4.57087	2.06619	1.44349
1254	TBIM001254	Bsv0100-00001319-RA	-	9	0	0	0	0	0	0	0	0	0
1255	TBIM001255	Bsv0100-00001237-RA	-	9	0	0	0	0	0	0	0	0	0
1256	TBIM001256	Bsv0100-00001238-RA	Protein FAR1-RELATED SEQUENCE 5 [Source:SWISS;Acc:Q9SZL8]	9	0	0	0	0	0	0	0	0	0
1257	TBIM001257	Bsv0100-00001239-RA	-	9	0	0	0	0	0	0	0	0	0
1258	TBIM001258	Bsv0100-00001240-RA	Cysteine-rich receptor-like protein kinase 19 [Source:SWISS;Acc:Q8GWJ7]	9	0	0	0	0	0	0	0	0	0
1259	TBIM001259	Bsv0100-00001241-RA	-	9	0	0	0	0	0	0	0	0	0
1260	TBIM001260	Bsv0100-00001242-RA	-	9	0	0	0	0	0	0	0	0	0
1261	TBIM001261	Bsv0100-00001243-RA	-	9	0	0	0	0	0	0	0	0	0
1262	TBIM001262	Bsv0100-00001244-RA	Cysteine-rich receptor-like protein kinase 11 [Source:SWISS;Acc:Q9ZP16]	9	0	0	0	0	0	0	0	0	0
1263	TBIM001263	Bsv0100-00001245-RA	Cysteine-rich repeat secretory protein 9 [Source:SWISS;Acc:Q5Q0E2]	9	0	0	0	0	0	0	0	0	0
1264	TBIM001264	Bsv0100-00001246-RA	-	9	0	0	0	0	0	0	0	0	0
1265	TBIM001265	Bsv0100-00001247-RA	-	9	0.230478	0	0	0	0	0	0	0	0
1266	TBIM001266	Bsv0100-00001248-RA	-	9	0.100125	0	0	0.0583215	0	0.0653155	0.0546369	0	0
1267	TBIM001267	Bsv0100-00001249-RA	-	9	0	0	0	0	0	0	0	0	0
1268	TBIM001268	Bsv0100-00001250-RA	-	9	0	0	0	0	0	0	0	0	0
1269	TBIM001269	Bsv0100-00001251-RA	Cysteine-rich receptor-like protein kinase 10 [Source:SWISS;Acc:Q8GYA4]	9	0	0	0	0	0	0	0	0	0
1270	TBIM001270	Bsv0100-00001252-RA	Cysteine-rich receptor-like protein kinase 19 [Source:SWISS;Acc:Q8GWJ7]	9	0	0	0	0	0	0	0	0	0
1271	TBIM001271	Bsv0100-00001253-RA	G-type lectin S-receptor-like serine/threonine-protein kinase SD1-13 [Source:SWISS;Acc:Q9LPZ9]	9	0	0	0	0	0	0	0	0	0
1272	TBIM001272	Bsv0100-00001254-RA	Cysteine-rich receptor-like protein kinase 10 [Source:SWISS;Acc:Q8GYA4]	9	0	0	0	0	0	0	0	0	0
1273	TBIM001273	Bsv0100-00001255-RA	Histone deacetylase 2 [Source:SWISS;Acc:Q944K3]	9	0	0	0	0	0	0	0	0	0
1274	TBIM001274	Bsv0100-00001256-RA	Cysteine-rich receptor-like protein kinase 10 [Source:SWISS;Acc:Q8GYA4]	9	0	0	0	0	0	0	0	0	0
1275	TBIM001275	Bsv0100-00001257-RA	Cysteine-rich receptor-like protein kinase 25 [Source:SWISS;Acc:Q9M0X5]	9	0	0	0	0	0	0	0	0	0
1276	TBIM001276	Bsv0100-00001258-RA	-	9	0	0	0	0	0	0	0	0	0
1277	TBIM001277	Bsv0100-00001259-RA	-	9	0	0	0	0.297604	0.2825	0	0	0	0
1278	TBIM001278	Bsv0100-00001260-RA	-	9	0	0	0	0	0	0	0	0	0
1279	TBIM001279	Bsv0100-00001261-RA	Thioredoxin-like 2-1, chloroplastic [Source:SWISS;Acc:Q8LEK4]	9	10.9838	14.5505	5.14783	11.8778	10.8261	6.46255	11.0283	5.40103	12.777
1280	TBIM001280	Bsv0100-00001262-RA	Thioredoxin-like 2, chloroplastic [Source:SWISS;Acc:Q5TKD8]	9	81.1949	83.1039	69.6639	102.731	88.5252	85.8588	100.737	106.581	108.076
1281	TBIM001281	Bsv0100-00001263-RA	Putative AC transposase [Source:SWISS;Acc:P08770]	9	0	0	0	0	0	0	0	0	0
1282	TBIM001282	Bsv0100-00001264-RA	Putative AC transposase [Source:SWISS;Acc:P08770]	9	0	0	0	0	0	0	0	0	0
1283	TBIM001283	Bsv0100-00001265-RA	-	9	0	0	0	0	0	0	0	0	0
1284	TBIM001284	Bsv0100-00001266-RA	DEAD-box ATP-dependent RNA helicase 35 [Source:SWISS;Acc:Q9LU46]	9	31.8923	33.0348	40.7937	26.8922	28.4848	35.666	17.4177	20.687	17.2819
1285	TBIM001285	Bsv0100-00001267-RA	-	9	10.3258	9.89993	11.6686	11.0548	10.2949	9.11541	8.22174	7.42198	7.61514
1286	TBIM001286	Bsv0100-00001268-RA	Mitochondrial outer membrane import complex protein METAXIN [Source:SWISS;Acc:O64471]	9	0.155547	0	0	0	0	0	0	0	0
1287	TBIM001287	Bsv0100-00001320-RA	tRNA-specific adenosine deaminase 2 [Source:SWISS;Acc:Q5E9J7]	9	0.25028	0.941681	1.13164	0.857098	0.270939	0	0.775728	0	0
1288	TBIM001288	Bsv0100-00001321-RA	-	9	0	0	0	0	0	0	0	0	0
1289	TBIM001289	Bsv0100-00001322-RA	Serine/threonine-protein kinase WNK1 [Source:SWISS;Acc:Q9CAV6]	9	45.6241	43.4301	47.3079	53.4027	52.9038	52.3483	60.271	49.3294	49.3996
1290	TBIM001290	Bsv0100-00001323-RA	-	9	74.7821	81.1043	73.7717	107.27	90.6447	116.855	204.537	191.868	164.169
1291	TBIM001291	Bsv0100-00001324-RA	Pentatricopeptide repeat-containing protein At1g06710, mitochondrial [Source:SWISS;Acc:Q9M9X9]	9	4.97213	4.19565	5.38526	4.63063	4.75498	4.11541	3.01624	2.37982	2.97335
1292	TBIM001292	Bsv0100-00001325-RA	-	9	8.39058	7.52541	8.36402	7.27922	7.14868	6.33438	4.92917	3.94696	3.99859
1293	TBIM001293	Bsv0100-00001326-RA	Guanine deaminase [Source:SWISS;Acc:O34598]	9	78.0618	74.1189	47.6683	108.979	98.8256	62.5007	81.9327	66.9736	57.4544
1294	TBIM001294	Bsv0100-00001327-RA	Transposon TX1 uncharacterized 149 kDa protein [Source:SWISS;Acc:P14381]	9	0	0	0	0	0	0	0	0	0
1295	TBIM001295	Bsv0100-00001328-RA	Ubiquitin-conjugating enzyme E2 variant 1C [Source:SWISS;Acc:Q9SJ44]	9	0	0	0	0	0	0	0	0	0
1296	TBIM001296	Bsv0100-00001329-RA	-	9	0	0	0	0	0	0	0	0	0
1297	TBIM001297	Bsv0100-00001330-RA	-	9	0	0	0	0	0	0	0	0	0
1298	TBIM001298	Bsv0100-00001331-RA	-	9	0	0	0	0	0	0	0	0	0
1299	TBIM001299	Bsv0100-00001332-RA	-	9	0	0	0	0	0	0	0	0	0
1300	TBIM001300	Bsv0100-00001333-RA	-	9	0	0	0	0	0	0	0	0	0
1301	TBIM001301	Bsv0100-00001334-RA	-	9	6.66527	8.55408	7.47922	6.37312	7.35722	6.843	2.98435	5.18423	4.3866
1302	TBIM001302	Bsv0100-00001269-RA	-	9	0	0.167243	0	0	0	0	0.184259	0	0
1303	TBIM001303	Bsv0100-00001270-RA	-	9	0	0	0	0	0	0	0	0	0
1304	TBIM001304	Bsv0100-00001271-RA	-	9	1.33722	1.43221	1.96229	0.389366	1.66627	1.54675	0.527267	0.50148	1.25116
1305	TBIM001305	Bsv0100-00001272-RA	-	9	2.39354	3.27252	3.46009	1.53831	4.23402	1.96371	0.793176	3.85604	3.30975
1306	TBIM001306	Bsv0100-00001273-RA	-	9	0	0	0	0	0	0	0	0	0
1307	TBIM001307	Bsv0100-00001274-RA	-	9	14.1677	15.5148	14.3298	11.2559	11.0176	15.5559	7.04183	8.30046	13.0727
1308	TBIM001308	Bsv0100-00001275-RA	-	9	0	0	0	0	0	0	0	0	0
1309	TBIM001309	Bsv0100-00001276-RA	-	9	0	0	0	0	0	0	0	0	0
1310	TBIM001310	Bsv0100-00001277-RA	-	9	0	0	0	0.10687	0	0	0	0	0
1311	TBIM001311	Bsv0100-00001278-RA	-	9	2.90794	2.29357	1.19702	0.654381	0.471899	0	0	0.300485	0
1312	TBIM001312	Bsv0100-00001279-RA	-	9	0	0	0	0	0	0	0	0	0
1313	TBIM001313	Bsv0100-00001280-RA	-	9	0	0	0	0	0	0	0	0	0
1314	TBIM001314	Bsv0100-00001281-RA	PHD finger-containing protein DDB_G0268158 [Source:SWISS;Acc:Q55FD6]	9	12.1833	11.0899	11.9108	6.76261	8.19206	6.38768	3.40859	4.47965	4.26397
1315	TBIM001315	Bsv0100-00001282-RA	Uncharacterized N-acetyltransferase ycf52 [Source:SWISS;Acc:P51192]	9	87.3965	82.0782	70.1007	101.678	108.61	117.956	159.368	187.84	138.338
1316	TBIM001316	Bsv0100-00001283-RA	None [Source:SWISS;Acc:Q7X6P3]	9	26.1118	26.2668	30.084	24.5144	25.6273	22.7391	10.3565	11.4843	12.8065
1317	TBIM001317	Bsv0100-00001284-RA	Hevamine-A [Source:SWISS;Acc:P23472]	9	0	0	0	0	0	0	0	0	0
1318	TBIM001318	Bsv0100-00001285-RA	-	9	0	0	0	0	0	0	0	0	0
1319	TBIM001319	Bsv0100-00001286-RA	-	9	0	0	0	0	0	0	0	0	0
1320	TBIM001320	Bsv0100-00001287-RA	-	9	0	0	0	0	0	0	0	0	0
1321	TBIM001321	Bsv0100-00001288-RA	-	9	0	0	0	0	0	0	0	0	0
1322	TBIM001322	Bsv0100-00001289-RA	-	9	0	0	0	0	0	0	0	0	0
1323	TBIM001323	Bsv0100-00001290-RA	-	9	0	0	0	0	0	0	0	0	0
1324	TBIM001324	Bsv0100-00001291-RA	-	9	0	0	0	0	0	0	0	0	0
1325	TBIM001325	Bsv0100-00001292-RA	-	9	0	0	0	0	0	0	0	0	0
1326	TBIM001326	Bsv0100-00001293-RA	-	9	0	0	0	0	0	0	0	0	0
1327	TBIM001327	Bsv0100-00001294-RA	-	9	0	0	0	0	0	0	0	0	0
1328	TBIM001328	Bsv0100-00001295-RA	-	9	0	0	0	0	0	0	0	0	0
1329	TBIM001329	Bsv0100-00001296-RA	-	9	0	0	0	0	0	0	0	0	0
1330	TBIM001330	Bsv0100-00001297-RA	-	9	0	0	0	0	0	0	0	0	0
1331	TBIM001331	Bsv0100-00001298-RA	-	9	0	0	0	0	0	0	0	0	0
1332	TBIM001332	Bsv0100-00001299-RA	-	9	0	0	0	0	0	0	0	0	0
1333	TBIM001333	Bsv0100-00001300-RA	-	9	0	0	0	0	0	0	0	0	0
1334	TBIM001334	Bsv0100-00001301-RA	Mitochondrial outer membrane protein porin 2 [Source:SWISS;Acc:Q9FJX3]	9	0	0	0	0	0	0	0	0	0
1335	TBIM001335	Bsv0100-00001335-RA	-	9	0	0	0	0	0	0	0	0	0
1336	TBIM001336	Bsv0100-00001336-RA	-	9	0	0	0	0	0	0	0	0	0
1337	TBIM001337	Bsv0100-00001337-RA	-	9	0	0	0	0	0	0	0	0	0
1338	TBIM001338	Bsv0100-00001338-RA	-	9	0	0	0	0	0	0	0	0	0
1339	TBIM001339	Bsv0100-00001339-RA	rRNA-processing protein fcf2 [Source:SWISS;Acc:O42877]	9	45.224	46.2241	45.5967	42.0106	41.6102	48.2156	36.7941	54.5152	42.3084
1340	TBIM001340	Bsv0100-00001340-RA	Syntaxin-52 [Source:SWISS;Acc:Q94KK7]	9	0	0	0	0	0	0	0	0	0
1341	TBIM001341	Bsv0100-00001341-RA	1-acyl-sn-glycerol-3-phosphate acyltransferase 2 [Source:SWISS;Acc:Q9XFW4]	9	0	0	0	0	0	0	0	0	0
1342	TBIM001342	Bsv0100-00001342-RA	Peptidyl-prolyl cis-trans isomerase, chloroplastic [Source:SWISS;Acc:O49939]	9	74.2186	74.1875	53.9398	92.7114	94.1782	91.0093	109.72	93.3612	84.4829
1343	TBIM001343	Bsv0100-00001343-RA	Shikimate O-hydroxycinnamoyltransferase [Source:SWISS;Acc:Q8GSM7]	9	0	0	0	0	0.44805	0	0	0	0
1344	TBIM001344	Bsv0100-00001344-RA	ATP-dependent DNA helicase pfh1 [Source:SWISS;Acc:Q9UUA2]	9	0	0	0	0	0	0	0	0	0
1345	TBIM001345	Bsv0100-00001345-RA	Alpha/beta hydrolase domain-containing protein 17C [Source:SWISS;Acc:Q7ZVZ7]	9	47.8663	45.7747	33.2088	45.3409	42.948	27.4696	26.9861	18.2543	17.6954
1346	TBIM001346	Bsv0100-00001346-RA	Cathepsin B-like cysteine proteinase [Source:SWISS;Acc:P43157]	9	103.497	112.186	59.2042	118.304	113.271	70.9256	317.484	128.4	101.857
1347	TBIM001347	Bsv0100-00001347-RA	Leucine-rich repeat extensin-like protein 6 [Source:SWISS;Acc:Q9LUI1]	9	0	0	0	0	0	0	0	0.0999723	0
1348	TBIM001348	Bsv0100-00001348-RA	Protein tipD [Source:SWISS;Acc:O15736]	9	10.4231	11.2303	8.41949	9.75619	10.4586	6.46125	9.3098	5.28448	5.97154
1349	TBIM001349	Bsv0100-00001349-RA	None [Source:SWISS;Acc:Q9SYY4]	9	0	0	0	0	0	0	0	0	0
1350	TBIM001350	Bsv0100-00001350-RA	-	9	0	0	0	0	0	0	0	0	0
1351	TBIM001351	Bsv0100-00001351-RA	KDEL-tailed cysteine endopeptidase CEP1 [Source:SWISS;Acc:Q9FGR9]	9	2.80357	2.63685	2.72089	1.85237	2.58514	2.11058	1.73973	2.11359	1.7875
1352	TBIM001352	Bsv0100-00001352-RA	Peptide methionine sulfoxide reductase [Source:SWISS;Acc:P54153]	9	30.8877	31.8757	25.99	30.9291	32.7176	34.4085	21.4151	30.7685	22.1603
1353	TBIM001353	Bsv0100-00001353-RA	BTB/POZ and TAZ domain-containing protein 2 [Source:SWISS;Acc:Q94BN0]	9	322.798	317.926	297.074	543.581	529.031	452.168	867.955	450.653	433.512
1354	TBIM001354	Bsv0100-00001354-RA	-	9	0	0	0	0	0	0	0	0	0
1355	TBIM001355	Bsv0100-00001355-RA	-	9	0	0	0	0	0	0	0	0	0
1356	TBIM001356	Bsv0100-00001356-RA	Putative ribonuclease H protein At1g65750 [Source:SWISS;Acc:P0C2F6]	9	0	0	0	0	0	0	0	0	0
1357	TBIM001357	Bsv0100-00001357-RA	Probable pectate lyase 18 [Source:SWISS;Acc:Q9C5M8]	9	2.34379	2.44892	18.2417	2.32324	2.48388	9.64399	6.14018	18.8796	18.0135
1358	TBIM001358	Bsv0100-00001358-RA	AT-rich interactive domain-containing protein 3 [Source:SWISS;Acc:Q940Y3]	9	27.966	29.0418	31.3435	25.3027	29.6743	28.6343	16.4828	21.4545	22.2656
1359	TBIM001359	Bsv0100-00001359-RA	Protein STICHEL-like 2 [Source:SWISS;Acc:F4JRP8]	9	12.2484	12.1139	17.2924	9.70306	10.0997	11.4981	5.16411	4.88392	3.95807
1360	TBIM001360	Bsv0100-00001360-RA	U-box domain-containing protein 35 [Source:SWISS;Acc:Q9SW11]	9	0	0	0	0	0	0	0	0	0
1361	TBIM001361	Bsv0100-00001361-RA	Probable Ufm1-specific protease [Source:SWISS;Acc:Q9STL8]	9	11.6582	11.1911	11.8186	8.99348	10.391	7.44867	4.87933	4.5986	4.54552
1362	TBIM001362	Bsv0100-00001362-RA	Pentatricopeptide repeat-containing protein At5g50280, chloroplastic [Source:SWISS;Acc:Q9FGR7]	9	13.1929	14.3452	14.8178	15.7934	15.5536	17.4028	13.9151	13.7232	15.3864
1363	TBIM001363	Bsv0100-00001363-RA	Programmed cell death protein 4 [Source:SWISS;Acc:Q98TX3]	9	52.9236	53.2295	51.1392	54.5583	50.965	42.7283	60.6282	40.6015	41.0524
1364	TBIM001364	Bsv0100-00001364-RA	-	9	0	0	0	0	0	0	0	0	0
1365	TBIM001365	Bsv0100-00001365-RA	-	9	0	0.0931778	0	0.330016	0	0	0.100681	0	0
1366	TBIM001366	Bsv0100-00001366-RA	Probable UDP-N-acetylglucosamine--peptide N-acetylglucosaminyltransferase SEC [Source:SWISS;Acc:Q9M8Y0]	9	10.0606	9.16363	9.57779	8.78755	9.71012	8.87444	10.064	8.72017	8.15979
1367	TBIM001367	Bsv0100-00001367-RA	-	9	70.258	81.5832	62.6779	98.3953	103.523	134.079	266.496	124.915	107.186
1368	TBIM001368	Bsv0100-00001368-RA	-	9	0	0	0.100952	0	0.287283	0.346152	0.0919171	0	0
1369	TBIM001369	Bsv0100-00001369-RA	Haloacid dehalogenase-like hydrolase domain-containing protein At3g48420 [Source:SWISS;Acc:Q94K71]	9	18.3388	19.1524	17.7658	24.2918	23.3065	28.6361	26.2161	30.8381	41.5155
1370	TBIM001370	Bsv0100-00001370-RA	DNA-(apurinic or apyrimidinic site) lyase [Source:SWISS;Acc:Q5XF07]	9	13.4012	11.2147	14.03	9.88147	9.23413	9.68306	2.95613	4.01706	3.9723
1371	TBIM001371	Bsv0100-00001371-RA	-	9	0	0	0	0	0	0	0	0	0
1372	TBIM001372	Bsv0100-00001372-RA	-	9	0	0	0	0	0	0	0	0	0
1373	TBIM001373	Bsv0100-00001898-RA	-	9	0	0	0	0	0	0	0	0	0
1374	TBIM001374	Bsv0100-00001899-RA	-	9	0	0	0	0	0	0	0	0	0
1375	TBIM001375	Bsv0100-00001900-RA	40S ribosomal protein S19-2 [Source:SWISS;Acc:Q9LF30]	9	0	0	0	0	0	0	0	0	0
1376	TBIM001376	Bsv0100-00001901-RA	-	9	0	0	0	0	0	0	0	0	0
1377	TBIM001377	Bsv0100-00001902-RA	-	9	0	0	0	0	0	0	0	0	0
1378	TBIM001378	Bsv0100-00001903-RA	Transcription factor MYB44 [Source:SWISS;Acc:Q9FDW1]	9	0.0429566	0.0830988	0.199432	0.0500972	0.142872	0	0.0910623	0.0855857	0.241535
1379	TBIM001379	Bsv0100-00001904-RA	-	9	0	0	0	0	0	0	0	0	0
1380	TBIM001380	Bsv0100-00001905-RA	-	9	0	0	0	0	0	0	0	0	0
1381	TBIM001381	Bsv0100-00001373-RA	None [Source:SWISS;Acc:Q8GXN9]	9	8.58226	7.66538	7.58317	7.52118	7.99299	5.68738	5.08917	3.94426	4.1501
1382	TBIM001382	Bsv0100-00001374-RA	Putative phospholipid-transporting ATPase 9 [Source:SWISS;Acc:Q9SX33]	9	2.87063	2.51448	3.15724	2.50688	2.75886	2.46539	1.92559	2.2239	2.69087
1383	TBIM001383	Bsv0100-00001375-RA	Probable calcium-binding protein CML15 [Source:SWISS;Acc:Q9FZ75]	9	11.8394	13.275	11.2362	17.1499	14.5723	9.32781	26.4113	20.0161	13.3622
1384	TBIM001384	Bsv0100-00001376-RA	-	9	0	0	0	0	0	0	0	0.40916	0
1385	TBIM001385	Bsv0100-00001377-RA	Pentatricopeptide repeat-containing protein At5g39710 [Source:SWISS;Acc:Q9FIX3]	9	7.72794	7.37602	5.92229	7.07629	6.38753	5.27257	5.45046	4.28473	4.2769
1386	TBIM001386	Bsv0100-00001378-RA	-	9	1.96668	1.75069	1.29794	1.57519	2.14246	1.38285	0.985865	1.06923	1.62131
1387	TBIM001387	Bsv0100-00001379-RA	Calcium sensing receptor, chloroplastic [Source:SWISS;Acc:Q9FN48]	9	55.2776	58.7081	62.4706	51.3354	51.608	67.1927	55.9302	78.6547	70.2052
1388	TBIM001388	Bsv0100-00001380-RA	-	9	0	0	0	0	0	0	0	0	0
1389	TBIM001389	Bsv0100-00001381-RA	-	9	0	0	0	0	0	0	0	0	0
1390	TBIM001390	Bsv0100-00001382-RA	Protein FAR-RED ELONGATED HYPOCOTYL 3 [Source:SWISS;Acc:Q9LIE5]	9	0	0	0	0	0	0	0	0	0
1391	TBIM001391	Bsv0100-00001383-RA	Probable acyl-activating enzyme 17, peroxisomal [Source:SWISS;Acc:F4KBF3]	9	13.9396	14.3794	11.9203	16.1287	15.1455	12.4891	15.5295	13.223	12.3865
1392	TBIM001392	Bsv0100-00001384-RA	Phosphatase IMPL1, chloroplastic [Source:SWISS;Acc:Q94F00]	9	28.387	28.2759	22.5619	32.9766	30.3719	35.5651	45.3126	42.0499	37.2298
1393	TBIM001393	Bsv0100-00001385-RA	-	9	155.541	150.694	108.429	161.672	147.315	159.484	155.651	168.66	157.926
1394	TBIM001394	Bsv0100-00001386-RA	Mitochondrial translocator assembly and maintenance protein 41 homolog [Source:SWISS;Acc:Q3TUH1]	9	9.83323	9.64421	11.5192	7.8877	8.13009	8.12633	4.43398	4.72872	4.25891
1395	TBIM001395	Bsv0100-00001387-RA	-	9	0	0	0	0	0	0	0	0	0
1396	TBIM001396	Bsv0100-00001388-RA	Protein FAR1-RELATED SEQUENCE 11 [Source:SWISS;Acc:Q9SY66]	9	0	0	0	0	0	0	0	0	0
1397	TBIM001397	Bsv0100-00001389-RA	-	9	0	0	0	0	0	0	0	0	0
1398	TBIM001398	Bsv0100-00001390-RA	Tetraspanin-11 [Source:SWISS;Acc:Q9LPR6]	9	0	0	0	0	0	0	0	0.113792	0
1399	TBIM001399	Bsv0100-00001391-RA	-	9	8.58468	9.84783	12.2446	6.08651	5.8811	5.99165	2.68221	3.45949	2.53778
1400	TBIM001400	Bsv0100-00001392-RA	Enolase 1, chloroplastic [Source:SWISS;Acc:Q9C9C4]	9	34.1881	32.7732	36.4926	23.1131	23.4007	16.7311	3.30948	4.17325	4.1362
1401	TBIM001401	Bsv0100-00001393-RA	H/ACA ribonucleoprotein complex subunit 2-like protein [Source:SWISS;Acc:Q9LEY9]	9	111.386	113.85	131.087	76.1405	80.2126	103.46	27.4504	39.5048	28.9169
1402	TBIM001402	Bsv0100-00001394-RA	-	9	0	0	0	0	0	0	0	0	0
1403	TBIM001403	Bsv0100-00001395-RA	-	9	0	0	0	0	0	0	0	0	0
1404	TBIM001404	Bsv0100-00001396-RA	Phosphomevalonate kinase [Source:SWISS;Acc:P24521]	9	29.1263	31.5689	34.9109	29.0256	27.9869	28.3603	16.7054	22.4783	23.5852
1405	TBIM001405	Bsv0100-00001397-RA	Vacuolar protein sorting-associated protein 25 [Source:SWISS;Acc:Q8VZC9]	9	19.0036	18.4984	14.6746	17.0565	19.6573	13.0606	14.8734	11.4885	11.1141
1406	TBIM001406	Bsv0100-00001398-RA	Cytochrome c biogenesis protein ccsA [Source:SWISS;Acc:Q9M3J1]	9	0	0	0	0	0	0	0	0	0
1407	TBIM001407	Bsv0100-00001399-RA	-	9	0	0	0	0	0	0	0	0	0
1408	TBIM001408	Bsv0100-00001400-RA	-	9	22.3766	24.2179	30.0382	27.7989	22.644	22.3537	25.3243	15.4372	14.4309
1409	TBIM001409	Bsv0100-00001401-RA	Agmatine deiminase [Source:SWISS;Acc:Q8GWW7]	9	11.0264	11.4443	12.2174	10.3478	9.2491	7.81355	4.53457	4.2032	3.76592
1410	TBIM001410	Bsv0100-00001402-RA	Serine/threonine-protein kinase 16 [Source:SWISS;Acc:P57760]	9	26.0285	27.7219	31.133	26.8159	26.3119	22.9721	20.1927	19.4755	15.8048
1411	TBIM001411	Bsv0100-00001403-RA	Armadillo repeat-containing protein 7 [Source:SWISS;Acc:Q3UJZ3]	9	49.3615	49.1835	44.8773	42.2274	46.1598	35.2101	24.3532	25.5736	24.5062
1412	TBIM001412	Bsv0100-00001404-RA	-	9	0.592849	0.902209	0.228922	1.1391	0.215451	0	0.59672	0.585594	0.764359
1413	TBIM001413	Bsv0100-00001405-RA	-	9	0	0	0	0	0	0	0	0	0
1414	TBIM001414	Bsv0100-00001406-RA	Serine protease SPPA, chloroplastic [Source:SWISS;Acc:Q9C9C0]	9	20.4378	19.9502	22.045	29.5309	25.5967	32.1097	40.6746	41.3623	40.3478
1415	TBIM001415	Bsv0100-00001407-RA	MADS-box transcription factor 50 [Source:SWISS;Acc:Q9XJ60]	9	0.236908	0	1.09599	1.06456	0.514911	0	0.969878	2.55038	0.790619
1416	TBIM001416	Bsv0100-00001408-RA	-	9	0	0	0	0	0	0	0	0	0
1417	TBIM001417	Bsv0100-00001409-RA	-	9	0	0	0	0	0	0	0	0	0
1418	TBIM001418	Bsv0100-00001410-RA	Pentatricopeptide repeat-containing protein At1g18485 [Source:SWISS;Acc:Q0WN60]	9	2.34214	2.07666	1.59645	3.34272	3.50149	2.68123	3.63499	3.31833	3.88447
1419	TBIM001419	Bsv0100-00001411-RA	-	9	0	0	0	0	0	0	0	0	0
1420	TBIM001420	Bsv0100-00001412-RA	-	9	26.2589	26.6028	25.7605	20.434	19.8999	26.7001	14.4369	14.2979	12.3044
1421	TBIM001421	Bsv0100-00001413-RA	E3 ubiquitin-protein ligase RING1 [Source:SWISS;Acc:P0CH30]	9	16.0398	16.7818	17.5042	16.2332	18.4559	19.9377	13.0023	18.6815	22.7547
1422	TBIM001422	Bsv0100-00001414-RA	WD repeat and HMG-box DNA-binding protein 1 [Source:SWISS;Acc:O13046]	9	13.1419	12.8615	15.7185	8.16751	7.69151	6.58291	2.48522	2.15048	2.40867
1423	TBIM001423	Bsv0100-00001415-RA	-	9	0	0.135346	0	0	0	0	0	0	0
1424	TBIM001424	Bsv0100-00001416-RA	-	9	0	0	0	0	0	0	0	0	0
1425	TBIM001425	Bsv0100-00001417-RA	-	9	0	0	0	0	0	0	0	0	0
1426	TBIM001426	Bsv0100-00001418-RA	-	9	0	0	0	0	0	0	0	0	0
1427	TBIM001427	Bsv0100-00001419-RA	UDP-glycosyltransferase 89B1 [Source:SWISS;Acc:Q9C9B0]	9	2.6065	1.12693	0.661235	1.02485	0.960228	0	0.304588	0.288503	0.51418
1428	TBIM001428	Bsv0100-00001420-RA	UDP-glycosyltransferase 89B1 [Source:SWISS;Acc:Q9C9B0]	9	3.89385	3.54775	1.90296	1.1375	2.10654	0.572432	0.518077	0.0603322	0
1429	TBIM001429	Bsv0100-00001421-RA	-	9	0	0	0	0	0	0	0	0	0
1430	TBIM001430	Bsv0100-00001422-RA	-	9	0	0	0	0	0	0	0	0	0
1431	TBIM001431	Bsv0100-00001423-RA	Protein FAR1-RELATED SEQUENCE 5 [Source:SWISS;Acc:Q9SZL8]	9	0	0	0	0	0	0	0	0	0
1432	TBIM001432	Bsv0100-00001424-RA	Protein FAR1-RELATED SEQUENCE 6 [Source:SWISS;Acc:Q9SSQ4]	9	0	0	0	0	0	0	0	0	0
1433	TBIM001433	Bsv0100-00001425-RA	Protein FAR-RED IMPAIRED RESPONSE 1 [Source:SWISS;Acc:Q9SWG3]	9	0	0	0	0	0	0	0	0	0
1434	TBIM001434	Bsv0100-00001426-RA	-	9	0.362977	0.581144	0.137665	0.280825	0.39769	0.317137	0.658373	0.390749	0.443715
1435	TBIM001435	Bsv0100-00001427-RA	UDP-glycosyltransferase 89B1 [Source:SWISS;Acc:Q9C9B0]	9	3.80743	4.40639	3.8457	2.9139	2.30873	2.39632	3.55228	1.73296	1.7398
1436	TBIM001436	Bsv0100-00001428-RA	-	9	0	0	0	0	0	0	0	0	0
1437	TBIM001437	Bsv0100-00001429-RA	E3 ubiquitin-protein ligase Topors [Source:SWISS;Acc:Q9V8P9]	9	18.2318	18.4465	16.3822	14.7661	15.0347	12.3916	10.8233	10.2363	9.33062
1438	TBIM001438	Bsv0100-00001430-RA	-	9	0	0	0	0	0	0	0	0	0
1439	TBIM001439	Bsv0100-00001431-RA	Replication protein A 70 kDa DNA-binding subunit B [Source:SWISS;Acc:Q10Q08]	9	0	0	0	0	0	0	0.156942	0	0
1440	TBIM001440	Bsv0100-00001432-RA	-	9	0	0	0	0	0	0	0	0	0
1441	TBIM001441	Bsv0100-00001433-RA	CBL-interacting serine/threonine-protein kinase 1 [Source:SWISS;Acc:Q8RWC9]	9	0	0	0	0	0	0	0	0	0
1442	TBIM001442	Bsv0100-00001434-RA	-	9	0	0	0	0	0	0	0	0	0
1443	TBIM001443	Bsv0100-00001435-RA	-	9	0	0	0	0	0	0	0	0	0
1444	TBIM001444	Bsv0100-00001436-RA	DNA topoisomerase 3-alpha [Source:SWISS;Acc:Q9NG98]	9	0	0	0	0	0	0	0	0	0
1445	TBIM001445	Bsv0100-00001437-RA	-	9	0	0	0	0	0	0	0	0	0
1446	TBIM001446	Bsv0100-00001438-RA	-	9	0	0	0	0	0	0	0	0	0
1447	TBIM001447	Bsv0100-00001439-RA	Putative pectinesterase/pectinesterase inhibitor 45 [Source:SWISS;Acc:Q9SMY6]	9	0	0	0	0	0	0	0	0	0
1448	TBIM001448	Bsv0100-00001440-RA	Probable pectinesterase/pectinesterase inhibitor VGDH2 [Source:SWISS;Acc:Q5MFV6]	9	0	0	0	0	0	0	0	0	0
1449	TBIM001449	Bsv0100-00001441-RA	-	9	4.56354	4.52275	3.45348	3.7524	3.25746	3.44157	4.22861	2.74761	3.17041
1450	TBIM001450	Bsv0100-00001442-RA	U-box domain-containing protein 9 [Source:SWISS;Acc:Q9SRT0]	9	0	0	0	0	0	0	0	0	0
1451	TBIM001451	Bsv0100-00001443-RA	-	9	0.144296	0.138307	0.168153	0	0	0	0	0	0
1452	TBIM001452	Bsv0100-00001444-RA	-	9	8.41908	7.35358	8.15855	7.3729	6.87578	10.8754	5.50981	8.53887	10.5644
1453	TBIM001453	Bsv0100-00001445-RA	-	9	6.31873	5.28538	8.79091	7.97487	6.72271	8.33401	5.41447	6.92877	7.28678
1454	TBIM001454	Bsv0100-00001446-RA	Meiosis arrest female protein 1 homolog [Source:SWISS;Acc:E1BZ85]	9	21.3593	20.528	22.0968	25.7471	23.324	19.142	26.4419	18.9492	17.9087
1455	TBIM001455	Bsv0100-00001447-RA	BI1-like protein [Source:SWISS;Acc:Q94A20]	9	0.343449	1.65696	1.98684	0.400347	0.375498	0.450465	0	0	0.58899
1456	TBIM001456	Bsv0100-00001448-RA	Squamosa promoter-binding-like protein 1 [Source:SWISS;Acc:Q9SMX9]	9	39.6675	38.7981	52.9063	31.0463	33.9815	39.2573	20.8148	29.5557	30.7215
1457	TBIM001457	Bsv0100-00001449-RA	LL-diaminopimelate aminotransferase, chloroplastic [Source:SWISS;Acc:Q93ZN9]	9	116.78	121.483	116.687	127.745	114.431	122.204	63.1873	66.7473	69.9501
1458	TBIM001458	Bsv0100-00001450-RA	S-adenosylmethionine synthase 2 [Source:SWISS;Acc:Q9FPL6]	9	108.416	117.619	157.854	128.391	120.16	150.953	98.781	113.843	98.648
1459	TBIM001459	Bsv0100-00001451-RA	WD repeat-containing protein 6 [Source:SWISS;Acc:Q99ME2]	9	6.55872	6.31599	7.18355	6.24347	6.26183	5.46284	2.30713	2.68007	2.5949
1460	TBIM001460	Bsv0100-00001452-RA	ATP synthase gamma chain, chloroplastic [Source:SWISS;Acc:P29790]	9	0	0	0.589429	0	0	0	0	0	0
1461	TBIM001461	Bsv0100-00001453-RA	-	9	0	0	0	0	0	0	0	0	0
1462	TBIM001462	Bsv0100-00001454-RA	-	9	0	0	0	0	0	0	0	0	0
1463	TBIM001463	Bsv0100-00001455-RA	-	9	0	0	0	0	0	0	0	0	0
1464	TBIM001464	Bsv0100-00001456-RA	-	9	0.190816	0	0	0.23463	0.88457	0.266102	0	0	0
1465	TBIM001465	Bsv0100-00001457-RA	Autophagy-related protein 8i [Source:SWISS;Acc:Q9LRP7]	9	35.57	38.6252	28.62	29.4583	26.7031	22.1895	22.3695	18.6386	20.1851
1466	TBIM001466	Bsv0100-00001458-RA	-	9	0	0	0	0	0	0	0	0	0
1467	TBIM001467	Bsv0100-00001459-RA	-	9	0	0	0	0	0	0	0	0	0
1468	TBIM001468	Bsv0100-00001460-RA	-	9	0	0	0	0	0	0	0	0	0
1469	TBIM001469	Bsv0100-00001461-RA	-	9	0	0	0	0	0	0	0	0	0
1470	TBIM001470	Bsv0100-00001462-RA	-	9	0	0	0	0	0	0	0	0	0
1471	TBIM001471	Bsv0100-00001463-RA	-	9	0	0	0	0	0	0	0	0	0
1472	TBIM001472	Bsv0100-00001464-RA	Serine/threonine-protein phosphatase BSL3 [Source:SWISS;Acc:Q9SHS7]	9	0	0	0	0	0	0	0	0	0
1473	TBIM001473	Bsv0100-00001465-RA	-	9	0	0	0	0	0	0	0	0	0
1474	TBIM001474	Bsv0100-00001466-RA	-	9	2.20838	2.58312	3.90704	1.61624	2.44891	3.56187	0.897236	2.45298	3.71827
1475	TBIM001475	Bsv0100-00001467-RA	-	9	4.09946	4.9668	3.35902	3.06891	5.12444	6.92719	0.946036	6.12142	6.21091
1476	TBIM001476	Bsv0100-00001468-RA	Mitogen-activated protein kinase 16 [Source:SWISS;Acc:Q8W4J2]	9	43.0748	42.1865	47.2547	40.2305	41.6608	37.6845	30.6416	33.4484	32.7154
1477	TBIM001477	Bsv0100-00001469-RA	Replication protein A 70 kDa DNA-binding subunit B [Source:SWISS;Acc:Q10Q08]	9	2.27083	0.799026	2.73038	0.321699	0.309845	0.936205	0.299616	0.992906	0.255195
1478	TBIM001478	Bsv0100-00001470-RA	ATP-dependent DNA helicase PIF1 [Source:SWISS;Acc:Q5AXT5]	9	0.038295	0.0555282	0.0661202	0.0221758	0.0637355	0.0505647	0.0206412	0.0387854	0.0988933
1479	TBIM001479	Bsv0100-00001471-RA	Putative AC transposase [Source:SWISS;Acc:P08770]	9	0	0	0	0	0	0	0	0	0
1480	TBIM001480	Bsv0100-00001472-RA	None [Source:SWISS;Acc:Q6AVI0]	9	0	0	0	0	0	0	0	0	0
1481	TBIM001481	Bsv0100-00001473-RA	-	9	0	0	0	0	0	0	0	0	0
1482	TBIM001482	Bsv0100-00001474-RA	-	9	0	0	0	0	0	0	0	0	0
1483	TBIM001483	Bsv0100-00001475-RA	Pentatricopeptide repeat-containing protein At1g01970 [Source:SWISS;Acc:Q9LPC4]	9	20.5273	21.1604	20.133	23.0489	21.868	23.5378	20.2908	19.8705	15.002
1484	TBIM001484	Bsv0100-00001476-RA	-	9	0.0857906	0.246532	0	0.0985795	0	0	0	0	0
1485	TBIM001485	Bsv0100-00001477-RA	-	9	0	0	0	0	0	0	0	0	0
1486	TBIM001486	Bsv0100-00001478-RA	BTB/POZ and MATH domain-containing protein 1 [Source:SWISS;Acc:Q8L765]	9	20.9297	18.4418	13.8027	17.2502	19.3256	13.8014	18.4008	17.0637	19.8865
1487	TBIM001487	Bsv0100-00001479-RA	BTB/POZ and MATH domain-containing protein 2 [Source:SWISS;Acc:Q9M8J9]	9	35.9522	31.0673	23.3482	33.8338	35.2558	27.347	33.9623	26.6603	23.1812
1488	TBIM001488	Bsv0100-00001480-RA	-	9	0	0	0	0	0	0	0	0	0
1489	TBIM001489	Bsv0100-00001481-RA	-	9	0	0	0	0	0	0	0	0	0
1490	TBIM001490	Bsv0100-00001482-RA	DNA-directed RNA polymerase subunit beta'' [Source:SWISS;Acc:Q2VEI6]	9	0	0	0	0	0	0	0	0	0
1491	TBIM001491	Bsv0100-00001483-RA	Camelliol C synthase [Source:SWISS;Acc:P0C8Y0]	9	0	1.05354	0	0	0	1.48215	0	0	0
1492	TBIM001492	Bsv0100-00001484-RA	Beta-amyrin synthase [Source:SWISS;Acc:Q8W3Z1]	9	0	0	0.0616669	0	0	0	0	0	0
1493	TBIM001493	Bsv0100-00001485-RA	-	9	0	0	0	0	0	0	0	0	0
1494	TBIM001494	Bsv0100-00001486-RA	-	9	0	0	0	0	0	0	0	0	0
1495	TBIM001495	Bsv0100-00001506-RA	-	9	0	0	0	0	0	0	0	0	0
1496	TBIM001496	Bsv0100-00001507-RA	Probable E3 ubiquitin-protein ligase ARI8 [Source:SWISS;Acc:Q8W468]	9	12.042	11.5185	20.1617	14.1127	14.4296	16.9193	5.81755	10.5294	10.1328
1497	TBIM001497	Bsv0100-00001508-RA	Pentatricopeptide repeat-containing protein At2g37310 [Source:SWISS;Acc:Q9ZUT5]	9	3.34917	3.44334	4.14951	2.3116	2.78577	2.59349	1.5074	1.55934	1.97007
1498	TBIM001498	Bsv0100-00001509-RA	None [Source:SWISS;Acc:Q94BP0]	9	63.7284	64.7604	79.6052	59.8613	56.7138	54.0815	46.0118	41.7551	36.7312
1499	TBIM001499	Bsv0100-00001510-RA	-	9	0.030871	0	0.0339155	0.0702433	0.0327845	0	0.0311028	0.060394	0.061265
1500	TBIM001500	Bsv0100-00001511-RA	None [Source:SWISS;Acc:F4IDU4]	9	130.722	131.078	123.29	125.559	113.619	123.175	35.4909	32.3984	28.9404
1501	TBIM001501	Bsv0100-00001512-RA	Putative 4-hydroxy-tetrahydrodipicolinate reductase 3, chloroplastic [Source:SWISS;Acc:Q9FJ82]	9	9.84636	10.5614	10.0776	10.5063	9.93703	10.6618	13.9098	14.5265	13.4712
1502	TBIM001502	Bsv0100-00001513-RA	Putative 4-hydroxy-tetrahydrodipicolinate reductase 3, chloroplastic [Source:SWISS;Acc:Q9FJ82]	9	33.8567	34.626	47.4396	43.566	41.7607	88.2258	35.3644	76.6575	61.5833
1503	TBIM001503	Bsv0100-00001514-RA	BAG family molecular chaperone regulator 1 [Source:SWISS;Acc:Q0WUQ1]	9	49.9342	48.3695	38.5424	43.1675	44.7698	27.2885	31.1505	16.4651	16.008
1504	TBIM001504	Bsv0100-00001515-RA	MATE efflux family protein 9 [Source:SWISS;Acc:Q8RWF5]	9	1.38975	1.32802	1.73957	1.03727	1.19605	0.90096	0.857371	0.896473	0.974753
1505	TBIM001505	Bsv0100-00001516-RA	Arginine/serine-rich-splicing factor RSP40 [Source:SWISS;Acc:P92965]	9	23.1133	21.2013	28.7696	19.2221	18.5708	22.7523	15.1756	14.2436	14.2447
1506	TBIM001506	Bsv0100-00001517-RA	LOB domain-containing protein 24 [Source:SWISS;Acc:P59468]	9	0	0	0	0	0	0	0	0	0
1507	TBIM001507	Bsv0100-00001518-RA	Two-component response regulator ARR2 [Source:SWISS;Acc:Q9ZWJ9]	9	0	0	0	0	0	0	0	0	0
1508	TBIM001508	Bsv0100-00001519-RA	-	9	21.5946	21.3372	18.8229	26.3466	23.2888	31.9233	54.4921	44.8557	32.1942
1509	TBIM001509	Bsv0100-00001520-RA	28S ribosomal protein S29, mitochondrial [Source:SWISS;Acc:P51398]	9	46.8732	46.1285	54.1025	42.4038	45.2786	45.3608	27.2241	32.4502	28.6084
1510	TBIM001510	Bsv0100-00001521-RA	-	9	3.31189	1.05808	4.38125	2.1675	2.38327	2.86717	2.85183	2.99159	2.37675
1511	TBIM001511	Bsv0100-00001522-RA	Dehydration-responsive element-binding protein 1D [Source:SWISS;Acc:Q9FJ93]	9	3.38585	4.24864	0.267978	5.51425	6.02698	0.0686783	16.3062	2.71172	2.21472
1512	TBIM001512	Bsv0100-00001523-RA	Post-GPI attachment to proteins factor 3 [Source:SWISS;Acc:Q0VFE3]	9	35.002	34.6307	23.2483	20.586	19.1262	22.1923	6.1863	12.8932	12.1821
1513	TBIM001513	Bsv0100-00001524-RA	ABC transporter B family member 28 [Source:SWISS;Acc:Q8LPQ6]	9	20.73	20.7316	28.1377	26.1724	26.7564	32.2143	29.1625	31.6539	28.7001
1514	TBIM001514	Bsv0100-00001525-RA	-	9	14.3079	11.06	13.8943	16.8225	13.6533	23.927	43.1355	48.1649	53.6805
1515	TBIM001515	Bsv0100-00001526-RA	Calcium-dependent protein kinase 17 [Source:SWISS;Acc:Q9FMP5]	9	31.1582	28.6365	26.8003	21.2047	21.9842	16.0797	14.5427	10.7486	8.83314
1516	TBIM001516	Bsv0100-00001527-RA	Uncharacterized protein ycf20 [Source:SWISS;Acc:Q1XDS2]	9	19.0369	19.2051	20.0469	20.4158	17.3129	23.6161	41.255	32.2599	25.1335
1517	TBIM001517	Bsv0100-00001528-RA	Pentatricopeptide repeat-containing protein At2g33680 [Source:SWISS;Acc:P93005]	9	10.408	9.6158	6.76318	8.73547	9.06323	6.30212	6.48583	4.7864	4.52419
1518	TBIM001518	Bsv0100-00001529-RA	Zinc finger CCCH domain-containing protein 48 [Source:SWISS;Acc:Q9FNZ2]	9	38.7663	36.5922	35.3915	35.8693	32.5236	30.404	22.2267	22.518	23.3647
1519	TBIM001519	Bsv0100-00001530-RA	Sorbitol dehydrogenase [Source:SWISS;Acc:Q9FJ95]	9	34.2976	36.7777	18.5036	35.664	35.0992	16.8001	63.2478	28.4731	30.9947
1520	TBIM001520	Bsv0100-00001531-RA	-	9	6.66039	5.4659	5.35226	6.67895	5.19308	4.6987	1.13777	4.15993	0.857525
1521	TBIM001521	Bsv0100-00001532-RA	Protein HOTHEAD [Source:SWISS;Acc:Q9S746]	9	24.1846	25.4916	27.4743	17.8765	19.1145	16.7115	0.339356	0.865977	1.02448
1522	TBIM001522	Bsv0100-00001533-RA	Protein YLS3 [Source:SWISS;Acc:O64864]	9	0.369392	0.175658	0.198125	0.210701	0.593425	0.238963	0	0.187759	0
1523	TBIM001523	Bsv0100-00001534-RA	-	9	78.2642	80.1423	64.3349	100.63	93.0486	106.255	154.607	141.402	124.206
1524	TBIM001524	Bsv0100-00001535-RA	Molybdenum cofactor sulfurase [Source:SWISS;Acc:Q21657]	9	5.52243	5.13621	9.96051	5.3379	5.54655	7.63243	1.55936	5.09593	4.27784
1525	TBIM001525	Bsv0100-00001536-RA	Transcription factor TCP19 [Source:SWISS;Acc:Q9LT89]	9	23.0883	21.2451	17.1409	16.4724	18.5098	12.9856	10.1259	5.0091	5.30651
1526	TBIM001526	Bsv0100-00001537-RA	Peroxidase 66 [Source:SWISS;Acc:Q9LT91]	9	0	0	0	0	0	0	0	0	0
1527	TBIM001527	Bsv0100-00001538-RA	Peroxidase 66 [Source:SWISS;Acc:Q9LT91]	9	43.7012	43.3629	42.3538	53.1205	45.9209	50.3168	20.3264	26.5526	26.7041
1528	TBIM001528	Bsv0100-00001539-RA	Peroxidase 66 [Source:SWISS;Acc:Q9LT91]	9	17.2454	16.6494	16.4379	21.019	18.7429	19.2486	6.93779	11.0884	11.0912
1529	TBIM001529	Bsv0100-00001540-RA	-	9	11.1797	11.9166	10.8968	11.2402	11.2254	10.1094	12.2672	11.3204	7.90641
1530	TBIM001530	Bsv0100-00001541-RA	-	9	3.11934	2.41986	6.41124	0.878945	1.01761	1.7765	0.0224524	0.10667	0.237104
1531	TBIM001531	Bsv0100-00001542-RA	-	9	12.6691	13.4969	14.6725	12.2455	11.9033	14.316	6.75015	9.37666	8.29048
1532	TBIM001532	Bsv0100-00001543-RA	None [Source:SWISS;Acc:Q9FLH8]	9	26.8854	27.8644	29.9704	25.0404	24.8416	24.6253	15.0396	20.6175	20.7961
1533	TBIM001533	Bsv0100-00001544-RA	Phosphoglucomutase, chloroplastic [Source:SWISS;Acc:Q9M4G5]	9	40.1388	39.7797	39.452	50.477	47.5812	56.2644	48.9576	52.3116	51.4861
1534	TBIM001534	Bsv0100-00001545-RA	Gibberellin 20 oxidase 1 [Source:SWISS;Acc:Q39110]	9	0.344546	0.267888	0.872073	0	0	0.717908	0	3.23088	1.72033
1535	TBIM001535	Bsv0100-00001546-RA	Carboxylesterase 1 [Source:SWISS;Acc:Q0ZPV7]	9	0.253883	0.144976	0.329703	0.0755432	0.145219	0.110158	0.0703202	0.179678	0.148729
1536	TBIM001536	Bsv0100-00001547-RA	-	9	0	0	0	0	0	0	0	0	0
1537	TBIM001537	Bsv0100-00001548-RA	Carboxylesterase 1 [Source:SWISS;Acc:Q0ZPV7]	9	1.16369	1.1558	2.05266	1.61493	1.23712	2.60845	2.95989	1.76466	1.36541
1538	TBIM001538	Bsv0100-00001549-RA	-	9	0.358205	0.258908	0.512763	0.146569	0.138045	0.209572	0.0188154	0.0178983	0.0341156
1539	TBIM001539	Bsv0100-00001550-RA	-	9	0	0	0	0	0	0	0	0	0
1540	TBIM001540	Bsv0100-00001551-RA	-	9	0	0	0	0	0	0	0	0	0
1541	TBIM001541	Bsv0100-00001552-RA	Transcription factor bHLH118 [Source:SWISS;Acc:Q9STJ7]	9	0	0	0	0	0	0	0	0	0
1542	TBIM001542	Bsv0100-00001553-RA	Transcription factor bHLH126 [Source:SWISS;Acc:Q9STJ6]	9	0	0	0	0	0	0	0	0	0
1543	TBIM001543	Bsv0100-00001554-RA	-	9	0.456068	0.457774	0.375091	0.298846	0.301814	0.165958	0.0192137	0.0365679	0.103501
1544	TBIM001544	Bsv0100-00001555-RA	-	9	0	0	0	0	0	0	0	0	0
1545	TBIM001545	Bsv0100-00001556-RA	Transcription factor bHLH126 [Source:SWISS;Acc:Q9STJ6]	9	0	0	0	0	0	0	0	0	0
1546	TBIM001546	Bsv0100-00001557-RA	Transcription factor bHLH118 [Source:SWISS;Acc:Q9STJ7]	9	0	0	0	0	0	0	0	0	0
1547	TBIM001547	Bsv0100-00001558-RA	Transcription factor bHLH120 [Source:SWISS;Acc:Q9FLI0]	9	8.40717	7.62006	9.0185	6.39037	4.80993	7.60179	0.583377	2.02879	2.64249
1548	TBIM001548	Bsv0100-00001559-RA	Receptor-like serine/threonine-protein kinase At4g25390 [Source:SWISS;Acc:Q9STJ8]	9	3.50375	3.48749	5.22059	2.86393	4.55138	4.98777	3.04899	3.49413	5.2016
1549	TBIM001549	Bsv0100-00001560-RA	None [Source:SWISS;Acc:Q9LY62]	9	21.2861	20.6172	15.1124	18.7484	19.7202	12.194	12.0415	9.40765	9.41529
1550	TBIM001550	Bsv0100-00001561-RA	-	9	0	0	0	0	0	0	0	0	0
1551	TBIM001551	Bsv0100-00001562-RA	CBL-interacting serine/threonine-protein kinase 11 [Source:SWISS;Acc:O22932]	9	6.58805	8.15246	7.86243	5.18003	6.738	4.4315	5.14857	5.93013	5.82168
1552	TBIM001552	Bsv0100-00001563-RA	Subtilisin-like protease [Source:SWISS;Acc:O65351]	9	42.3873	45.0351	38.009	44.0875	40.8704	30.3744	5.2304	4.33299	3.62056
1553	TBIM001553	Bsv0100-00001564-RA	3-ketoacyl-CoA synthase 6 [Source:SWISS;Acc:Q9XF43]	9	2.46505	2.37497	4.55339	0.673882	1.63296	0.672826	0	0.0636595	0
1554	TBIM001554	Bsv0100-00001565-RA	Alpha-L-fucosidase 1 [Source:SWISS;Acc:Q8GW72]	9	7.90851	9.52078	21.2748	6.68753	7.76592	11.2985	1.839	7.46544	7.29631
1555	TBIM001555	Bsv0100-00001566-RA	Pentatricopeptide repeat-containing protein At5g66520 [Source:SWISS;Acc:Q9FJY7]	9	1.38817	1.49113	1.29978	1.68731	2.15628	1.41322	1.44227	0.861447	2.09686
1556	TBIM001556	Bsv0100-00001567-RA	Mitochondrial metalloendopeptidase OMA1 [Source:SWISS;Acc:Q9P7G4]	9	11.632	13.2798	13.4217	11.953	11.9792	12.4467	10.9244	10.1645	11.134
1557	TBIM001557	Bsv0100-00001568-RA	DEAD-box ATP-dependent RNA helicase 7 [Source:SWISS;Acc:Q41382]	9	95.914	93.5396	90.2016	86.3448	91.087	70.7347	53.3937	47.4156	49.9098
1558	TBIM001558	Bsv0100-00001569-RA	Xyloglucan galactosyltransferase KATAMARI1 [Source:SWISS;Acc:Q7XJ98]	9	9.32504	10.3632	27.754	10.3352	8.09227	18.117	0.846626	7.91434	5.90069
1559	TBIM001559	Bsv0100-00001570-RA	-	9	0	0	0	0	0	0	0	0	0
1560	TBIM001560	Bsv0100-00001571-RA	CDGSH iron-sulfur domain-containing protein NEET [Source:SWISS;Acc:Q9FLI7]	9	40.7352	45.3369	38.927	48.9178	56.0601	59.5515	20.9186	57.959	54.4101
1561	TBIM001561	Bsv0100-00001572-RA	K(+) efflux antiporter 5 [Source:SWISS;Acc:Q8VYR9]	9	11.7185	9.82579	11.8358	11.2288	10.4434	9.95672	4.37018	5.10627	5.86839
1562	TBIM001562	Bsv0100-00001573-RA	-	9	0	0	0	0	0	0	0	0	0
1563	TBIM001563	Bsv0100-00001574-RA	Cysteine and histidine-rich domain-containing protein RAR1 [Source:SWISS;Acc:Q6EPW7]	9	16.3945	17.0774	20.9694	14.503	11.4902	11.503	6.72346	5.34169	4.11281
1564	TBIM001564	Bsv0100-00001575-RA	Box C/D snoRNA protein 1 [Source:SWISS;Acc:Q5RF97]	9	6.54908	6.09288	7.2794	5.18294	4.70683	4.9639	2.62467	3.0756	2.06621
1565	TBIM001565	Bsv0100-00001576-RA	Glutamyl-tRNA(Gln) amidotransferase subunit B, chloroplastic/mitochondrial [Source:SWISS;Acc:B9SQR9]	9	22.8966	24.6077	26.2465	26.9606	26.7174	30.7074	23.6772	25.5002	22.3226
1566	TBIM001566	Bsv0100-00001577-RA	Rop guanine nucleotide exchange factor 6 [Source:SWISS;Acc:Q9M056]	9	0	0	0	0	0	0	0	0	0
1567	TBIM001567	Bsv0100-00001578-RA	Transposon Ty3-G Gag-Pol polyprotein [Source:SWISS;Acc:Q99315]	9	0.097216	0.0699029	0.170185	0.127132	0.174301	0.143158	0.0253642	0.0359906	0.137802
1568	TBIM001568	Bsv0100-00001579-RA	Protein transport protein Sec24-like At4g32640 [Source:SWISS;Acc:Q9M081]	9	29.1263	29.1947	37.0709	30.0872	27.2036	28.6378	15.5789	17.3513	17.4188
1569	TBIM001569	Bsv0100-00001580-RA	Protein TPX2 [Source:SWISS;Acc:F4I2H7]	9	2.86544	3.05805	4.84978	1.66795	1.78553	1.53671	0	0.0597242	0.516104
1570	TBIM001570	Bsv0100-00001581-RA	Cleavage and polyadenylation specificity factor subunit 1 [Source:SWISS;Acc:Q9FGR0]	9	16.9584	15.9325	20.697	13.6748	14.1764	12.3297	6.38796	6.50891	6.2534
1571	TBIM001571	Bsv0100-00001582-RA	-	9	8.42579	9.33851	8.91012	9.51871	9.12636	9.4843	10.7256	15.0167	11.8978
1572	TBIM001572	Bsv0100-00001583-RA	Zinc finger A20 and AN1 domain-containing stress-associated protein 9 [Source:SWISS;Acc:Q7Y1W9]	9	0	0	0	0	0	0	0	0	0
1573	TBIM001573	Bsv0100-00001584-RA	-	9	3.16396	3.00621	1.85376	4.42867	5.25563	3.34519	8.79311	3.1686	3.3713
1574	TBIM001574	Bsv0100-00001585-RA	Probable aminotransferase ACS12 [Source:SWISS;Acc:Q8GYY0]	9	11.5591	13.6422	14.6122	12.2222	10.971	12.8005	3.02427	8.20748	7.03886
1575	TBIM001575	Bsv0100-00001586-RA	Putative disease resistance protein RGA1 [Source:SWISS;Acc:Q7XA42]	9	6.54472	5.68446	5.12451	4.37578	6.18889	3.33707	5.48826	6.79736	8.73852
1576	TBIM001576	Bsv0100-00001587-RA	Disease resistance protein RGA2 [Source:SWISS;Acc:Q7XBQ9]	9	1.72029	1.1936	1.39601	1.72494	1.59909	1.14859	1.61109	2.5961	3.83537
1577	TBIM001577	Bsv0100-00001588-RA	Disease resistance protein RGA2 [Source:SWISS;Acc:Q7XBQ9]	9	0.0965686	0.130458	0.229595	0.0677338	0.129536	0.102627	0.0410919	0.0968188	0.105267
1578	TBIM001578	Bsv0100-00001700-RA	-	9	0	0	0	0	0	0	0	0	0
1579	TBIM001579	Bsv0100-00001701-RA	-	9	0	0	0	0	0	0	0	0	0
1580	TBIM001580	Bsv0100-00001702-RA	-	9	0	0	0	0	0	0	0	0	0
1581	TBIM001581	Bsv0100-00001703-RA	Auxin transporter-like protein 4 [Source:SWISS;Acc:Q8L884]	9	18.0635	18.3765	10.5442	17.0586	15.5279	6.80823	23.28	9.78132	11.2703
1582	TBIM001582	Bsv0100-00001704-RA	-	9	0.0470164	0	0.0542954	0	0.104201	0.125313	0	0	0.0876175
1583	TBIM001583	Bsv0100-00001705-RA	IAA-amino acid hydrolase ILR1-like 3 [Source:SWISS;Acc:O81641]	9	30.3499	24.9786	31.473	35.4583	33.5959	22.0776	15.2564	13.6515	24.1341
1584	TBIM001584	Bsv0100-00001706-RA	CAAX prenyl protease 2 [Source:SWISS;Acc:Q8GW19]	9	9.81385	8.03519	9.41534	6.68725	5.5126	5.87703	5.6271	5.23818	3.8514
1585	TBIM001585	Bsv0100-00001707-RA	CAAX prenyl protease 2 [Source:SWISS;Acc:Q8GW19]	9	3.79854	6.88462	4.96511	6.68506	1.58921	5.718	2.07727	1.91547	5.51055
1586	TBIM001586	Bsv0100-00001708-RA	-	9	0	0	0	0	0	0	0	0	0
1587	TBIM001587	Bsv0100-00001709-RA	UPF0503 protein At3g09070, chloroplastic [Source:SWISS;Acc:Q9SS80]	9	19.0032	19.2888	22.0466	12.3257	17.8339	16.3554	3.98388	6.5015	8.54509
1588	TBIM001588	Bsv0100-00001710-RA	-	9	0	0	0	0	0	0	0	0	0
1589	TBIM001589	Bsv0100-00001620-RA	-	9	1.06167	3.0566	2.43726	1.28332	1.18424	0	0	0	0
1590	TBIM001590	Bsv0100-00001621-RA	-	9	0	0.934403	0	0	0	0	0	0	0
1591	TBIM001591	Bsv0100-00001622-RA	Chalcone synthase 2 [Source:SWISS;Acc:P53415]	9	20.2323	23.9921	17.4378	14.1655	12.9457	8.01918	2.00449	1.8578	1.75677
1592	TBIM001592	Bsv0100-00001623-RA	-	9	0	0	0	0	0	0	0	0	0
1593	TBIM001593	Bsv0100-00001624-RA	Wall-associated receptor kinase-like 2 [Source:SWISS;Acc:Q7X8C5]	9	8.99143	8.1946	5.5463	17.1557	14.7014	7.63439	46.7031	14.6603	13.7961
1594	TBIM001594	Bsv0100-00001625-RA	Wall-associated receptor kinase-like 2 [Source:SWISS;Acc:Q7X8C5]	9	0.557157	0.341313	0.70688	1.11584	0.551724	0.501691	0.660848	0.441333	0.2494
1595	TBIM001595	Bsv0100-00001626-RA	Peptidyl-prolyl cis-trans isomerase FKBP16-3, chloroplastic [Source:SWISS;Acc:O22870]	9	77.7909	87.3053	64.8085	89.1507	89.7847	94.5981	62.6616	66.6433	50.1072
1596	TBIM001596	Bsv0100-00001627-RA	-	9	20.5501	21.1532	18.7563	26.9211	23.1631	14.6187	24.6913	16.6891	12.5333
1597	TBIM001597	Bsv0100-00001628-RA	-	9	0	0	0	0	0	0	0	0	0
1598	TBIM001598	Bsv0100-00001629-RA	-	9	0	0	0	0	0	0	0	0	0
1599	TBIM001599	Bsv0100-00001630-RA	Pentatricopeptide repeat-containing protein At3g46870 [Source:SWISS;Acc:Q9STF9]	9	16.9778	14.4577	13.8737	13.3971	12.0841	14.7591	11.9051	13.4596	12.7028
1600	TBIM001600	Bsv0100-00001631-RA	TBC1 domain family member 22A [Source:SWISS;Acc:Q8WUA7]	9	21.9414	21.925	22.9145	20.6241	19.4057	17.1048	16.8489	12.0814	8.51876
1601	TBIM001601	Bsv0100-00001632-RA	Uncharacterized GPI-anchored protein At1g61900 [Source:SWISS;Acc:Q8GUI4]	9	67.504	64.9244	73.3405	60.1364	54.4769	55.1287	35.0092	40.6585	37.0705
1602	TBIM001602	Bsv0100-00001633-RA	Peroxisomal membrane protein 13 [Source:SWISS;Acc:Q9SRR0]	9	48.3763	48.2377	37.0997	43.983	44.3115	36.0255	63.3328	47.6677	45.7458
1603	TBIM001603	Bsv0100-00001634-RA	TBC1 domain family member 15 [Source:SWISS;Acc:Q9CXF4]	9	9.95793	9.55188	8.89451	7.79461	8.89068	7.03435	5.66738	3.66985	3.93043
1604	TBIM001604	Bsv0100-00001635-RA	Coatomer subunit delta [Source:SWISS;Acc:Q93Y22]	9	0.121668	0.116092	0.140143	0.279723	0.200751	0.0810013	0.0318902	0.0306128	0
1605	TBIM001605	Bsv0100-00001636-RA	Probable peroxidase 61 [Source:SWISS;Acc:Q9FLV5]	9	0.0469077	0	0.0536995	0	0	0	0	0	0.0826324
1606	TBIM001606	Bsv0100-00001637-RA	-	9	0	0	0	0	0	0	0	0	0
1607	TBIM001607	Bsv0100-00001638-RA	-	9	18.0578	16.1273	17.119	15.8544	15.5845	16.7465	16.0413	13.0664	10.2086
1608	TBIM001608	Bsv0100-00001639-RA	Cation/calcium exchanger 4 [Source:SWISS;Acc:Q9SYG9]	9	0	0	0	0	0	0	0	0	0
1609	TBIM001609	Bsv0100-00001640-RA	-	9	3.51073	3.35084	5.20333	4.33177	3.37928	5.91365	0.929683	1.79142	1.18835
1610	TBIM001610	Bsv0100-00001641-RA	-	9	30.201	24.4934	29.1839	21.8169	21.0358	24.2611	9.33513	19.5507	19.5997
1611	TBIM001611	Bsv0100-00001642-RA	-	9	4.13518	4.65611	4.07593	3.85571	2.87612	3.91796	2.84815	3.36968	3.16352
1612	TBIM001612	Bsv0100-00001643-RA	-	9	2.14523	2.70262	0	0	0.791091	0	1.58807	0.778368	0
1613	TBIM001613	Bsv0100-00001644-RA	Protein SHORT-ROOT [Source:SWISS;Acc:Q9SZF7]	9	0.740861	0.47994	0.632056	0.349091	0.55329	0	0.260503	0.0991587	0
1614	TBIM001614	Bsv0100-00001645-RA	60S ribosomal protein L38 [Source:SWISS;Acc:O22860]	9	53.0847	56.0764	64.5602	38.7301	45.2018	49.6602	20.4531	19.9525	32.5564
1615	TBIM001615	Bsv0100-00001646-RA	-	9	10.1071	9.73348	11.619	8.14489	6.90836	6.97061	6.34331	6.7329	5.70454
1616	TBIM001616	Bsv0100-00001647-RA	Calreticulin-3 [Source:SWISS;Acc:O04153]	9	14.4281	13.5465	12.4625	9.06207	7.91827	7.6485	6.82344	7.76783	6.68772
1617	TBIM001617	Bsv0100-00001648-RA	Probable hydroxyacylglutathione hydrolase 2, chloroplast [Source:SWISS;Acc:Q8LDW8]	9	51.1709	49.924	44.8183	45.3888	49.0292	47.4478	59.3006	60.1987	46.5086
1618	TBIM001618	Bsv0100-00001649-RA	-	9	0	0	0	0	0	0	0	0	0
1619	TBIM001619	Bsv0100-00001650-RA	Protein FAR-RED IMPAIRED RESPONSE 1 [Source:SWISS;Acc:Q9SWG3]	9	0	0	0	0	0	0	0	0	0
1620	TBIM001620	Bsv0100-00001651-RA	-	9	0	0	0	0	0	0	0	0	0
1621	TBIM001621	Bsv0100-00001652-RA	-	9	0	0	0	0	0	0	0	0	0
1622	TBIM001622	Bsv0100-00001653-RA	-	9	0	0	0	0	0	0	0	0	0
1623	TBIM001623	Bsv0100-00001654-RA	LOB domain-containing protein 6 [Source:SWISS;Acc:O04479]	9	0	0	0	0	0	0	0	0	0
1624	TBIM001624	Bsv0100-00001655-RA	-	9	0	0	0	0	0	0	0	0	0
1625	TBIM001625	Bsv0100-00001656-RA	-	9	0	0	0	0	0	0	0	0	0
1626	TBIM001626	Bsv0100-00001657-RA	3beta-hydroxysteroid-dehydrogenase/decarboxylase isoform 3 [Source:SWISS;Acc:A9X4U2]	9	13.7528	12.498	12.1135	15.0124	13.7189	12.6668	13.98	14.4148	14.3624
1627	TBIM001627	Bsv0100-00001658-RA	Flowering time control protein FPA [Source:SWISS;Acc:Q8LPQ9]	9	30.369	27.3832	34.4686	25.6112	27.9962	30.8363	15.8818	27.1926	28.2538
1628	TBIM001628	Bsv0100-00001659-RA	F-box protein SKIP16 [Source:SWISS;Acc:Q9LND7]	9	52.9023	51.7465	67.569	44.7466	43.7563	53.7114	32.2478	51.8776	47.4382
1629	TBIM001629	Bsv0100-00001660-RA	Probable transcription factor PosF21 [Source:SWISS;Acc:Q04088]	9	12.8822	14.8341	14.6043	11.0835	10.6412	9.19425	6.44324	6.53808	5.73954
1630	TBIM001630	Bsv0100-00001661-RA	-	9	9.7124	9.52957	12.144	9.43626	8.80896	13.2532	7.96082	12.02	9.0767
1631	TBIM001631	Bsv0100-00001662-RA	None [Source:SWISS;Acc:Q337B8]	9	35.2078	35.012	30.7108	35.9225	32.6932	25.7082	25.9009	22.1316	19.6667
1632	TBIM001632	Bsv0100-00001663-RA	Endochitinase CH25 [Source:SWISS;Acc:Q09023]	9	0.40291	0.881871	0.722266	0.149901	0.564509	0	0	0	0
1633	TBIM001633	Bsv0100-00001664-RA	Chitinase 9 [Source:SWISS;Acc:Q688M5]	9	0	0.59469	0.35654	0	0.345369	0	0	0	0
1634	TBIM001634	Bsv0100-00001665-RA	DNA-directed RNA polymerase subunit beta'' [Source:SWISS;Acc:P11704]	9	0.376172	0.135946	0.21719	0.107411	0.720461	0.671341	0.400634	0.727581	0.958493
1635	TBIM001635	Bsv0100-00001666-RA	Chitinase 9 [Source:SWISS;Acc:Q688M5]	9	1.5178	1.78394	3.56607	0.139426	0.0441162	0.269083	0	0	0
1636	TBIM001636	Bsv0100-00001667-RA	-	9	0	0	0	0	0	0	0	0	0
1637	TBIM001637	Bsv0100-00001668-RA	-	9	0	0	0	0	0	0	0	0	0
1638	TBIM001638	Bsv0100-00001669-RA	Chitinase 9 [Source:SWISS;Acc:Q688M5]	9	0.0896485	0.0419756	0.48367	0.0491834	0	0	0.0455589	0	0
1639	TBIM001639	Bsv0100-00001670-RA	Protein FAR1-RELATED SEQUENCE 11 [Source:SWISS;Acc:Q9SY66]	9	0.0574213	0	0	0	0	0	0	0.113656	0.0995182
1640	TBIM001640	Bsv0100-00001671-RA	B3 domain-containing protein REM9 [Source:SWISS;Acc:O81778]	9	0	0	0	0	0	0	0	0	0
1641	TBIM001641	Bsv0100-00001672-RA	B3 domain-containing protein REM9 [Source:SWISS;Acc:O81778]	9	0	0.0894317	0.10896	0	0.101231	0	0	0	0
1642	TBIM001642	Bsv0100-00001673-RA	B3 domain-containing protein REM9 [Source:SWISS;Acc:O81778]	9	0	0	0	0	0	0	0	0	0
1643	TBIM001643	Bsv0100-00001674-RA	Putative B3 domain-containing protein REM4 [Source:SWISS;Acc:Q9SB79]	9	0	0	0	0	0	0	0	0	0
1644	TBIM001644	Bsv0100-00001675-RA	B3 domain-containing protein REM9 [Source:SWISS;Acc:O81778]	9	1.20065	0.786145	1.27432	0.694231	0.298018	0.175615	0	0	0
1645	TBIM001645	Bsv0100-00001676-RA	-	9	11.1152	11.3667	12.4402	10.0226	9.98614	9.50325	10.7583	8.95342	7.04936
1646	TBIM001646	Bsv0100-00001677-RA	Putative B3 domain-containing protein REM15 [Source:SWISS;Acc:O23076]	9	2.62683	2.53405	2.04932	0.358873	0.346455	0.233454	0	0.261991	0.142392
1647	TBIM001647	Bsv0100-00001678-RA	None [Source:SWISS;Acc:Q9M1B4]	9	0.881391	0.923011	0.328821	1.774	1.21253	0.508731	0.923612	0.557742	0.122824
1648	TBIM001648	Bsv0100-00001679-RA	None [Source:SWISS;Acc:F4JSE7]	9	13.956	16.2626	13.0744	15.9219	14.0263	11.8355	20.7642	15.5686	14.3415
1649	TBIM001649	Bsv0100-00001680-RA	Rhomboid-related protein 4 [Source:SWISS;Acc:Q8TEB9]	9	9.095	7.2448	8.48881	7.45045	7.63269	7.83595	3.94345	5.28102	4.39265
1650	TBIM001650	Bsv0100-00001681-RA	Lysine--tRNA ligase [Source:SWISS;Acc:Q6F2U9]	9	52.6467	53.7972	49.8072	46.3692	44.8429	43.3211	29.2998	26.04	22.8103
1651	TBIM001651	Bsv0100-00001682-RA	-	9	0	0	0	0	0	0	0	0	0
1652	TBIM001652	Bsv0100-00001683-RA	-	9	0	0.0148552	0.037066	0	0	0	0	0	0
1653	TBIM001653	Bsv0100-00001684-RA	Salt tolerance-like protein [Source:SWISS;Acc:Q9SID1]	9	137.761	145.942	125.658	214.032	195.202	196.091	612.448	431.269	372.407
1654	TBIM001654	Bsv0100-00001685-RA	Probable LRR receptor-like serine/threonine-protein kinase At4g36180 [Source:SWISS;Acc:C0LGS2]	9	1.65939	1.6185	2.16986	1.13373	1.03613	0.97864	0.367726	0.231869	0.351222
1655	TBIM001655	Bsv0100-00001686-RA	Protein YIF1B-B [Source:SWISS;Acc:Q4FZQ0]	9	5.33486	5.44787	4.39534	2.15701	5.16955	3.54345	1.53214	2.00756	1.40684
1656	TBIM001656	Bsv0100-00001687-RA	-	9	6.63693	7.81365	7.09596	7.52618	5.47549	4.96582	6.24813	4.86427	4.49111
1657	TBIM001657	Bsv0100-00001688-RA	Probable fructokinase-4 [Source:SWISS;Acc:Q9M1B9]	9	127.542	138.25	108.807	123.018	108.833	75.88	60.1129	32.4128	28.3244
1658	TBIM001658	Bsv0100-00001689-RA	Pentatricopeptide repeat-containing protein At3g46870 [Source:SWISS;Acc:Q9STF9]	9	20.2613	18.2707	20.3688	15.2366	14.9312	12.8825	11.2008	10.4233	7.36629
1659	TBIM001659	Bsv0100-00001690-RA	Uncharacterized CRM domain-containing protein At3g25440, chloroplastic [Source:SWISS;Acc:Q67XL4]	9	9.08428	8.94389	9.57412	7.13427	7.38284	7.98354	5.87962	6.65447	5.52437
1660	TBIM001660	Bsv0100-00001691-RA	F-box protein CPR30 [Source:SWISS;Acc:Q9SU30]	9	9.10873	7.03565	6.2928	8.6849	7.13256	6.89119	8.00199	9.03697	10.9747
1661	TBIM001661	Bsv0100-00001692-RA	F-box protein At3g07870 [Source:SWISS;Acc:Q9SFC7]	9	1.24624	1.00788	0.980643	0.572563	0.70037	0.490089	0.356876	0.694085	0.611106
1662	TBIM001662	Bsv0100-00001693-RA	-	9	0.492903	0	0	0.552397	0.356233	0	0	0	0
1663	TBIM001663	Bsv0100-00001694-RA	F-box protein At3g07870 [Source:SWISS;Acc:Q9SFC7]	9	0	0	0	0	0	0	0	0	0
1664	TBIM001664	Bsv0100-00001695-RA	F-box protein At3g07870 [Source:SWISS;Acc:Q9SFC7]	9	3.43685	2.75861	2.03873	4.18065	3.93162	2.78349	3.48048	2.37387	3.81252
1665	TBIM001665	Bsv0100-00001696-RA	-	9	0	0	0.491175	0	0	0	0	0	0
1666	TBIM001666	Bsv0100-00001697-RA	F-box protein At3g07870 [Source:SWISS;Acc:Q9SFC7]	9	2.83376	3.33492	3.02219	3.04309	3.15659	1.65894	2.25989	1.86003	1.8318
1667	TBIM001667	Bsv0100-00001698-RA	ATP-dependent (S)-NAD(P)H-hydrate dehydratase [Source:SWISS;Acc:F6HDM2]	9	21.5602	20.9338	23.4447	20.8934	18.6627	19.1807	17.0219	17.8357	16.2521
1668	TBIM001668	Bsv0100-00001699-RA	Protein FAR1-RELATED SEQUENCE 5 [Source:SWISS;Acc:Q9SZL8]	9	7.97765	6.65807	6.24069	7.86518	7.33169	5.15896	11.2241	7.17927	5.31604
1669	TBIM001669	Bsv0100-00001711-RA	Pentatricopeptide repeat-containing protein At3g12770 [Source:SWISS;Acc:Q9LTV8]	9	0.933884	1.02525	0.84278	1.14159	0.549008	0.47974	0.414182	0.396856	0.444644
1670	TBIM001670	Bsv0100-00001712-RA	Centromere protein S [Source:SWISS;Acc:Q8N2Z9]	9	0.643397	1.19926	0	2.2468	0.705905	0.874471	0.700799	0	0
1671	TBIM001671	Bsv0100-00001713-RA	-	9	0	0	0	0	0	0	0	0	0
1672	TBIM001672	Bsv0100-00001714-RA	Protein MEI2-like 4 [Source:SWISS;Acc:Q64M78]	9	34.6633	35.4247	53.834	31.752	30.8488	37.6337	14.9833	29.5739	25.1421
1673	TBIM001673	Bsv0100-00001715-RA	U-box domain-containing protein 34 [Source:SWISS;Acc:Q8S8S7]	9	0	0	0	0	0	0	0	0	0
1674	TBIM001674	Bsv0100-00001716-RA	Threonine synthase, chloroplastic [Source:SWISS;Acc:Q9MT28]	9	0	0	0	0	0	0	0	0	0
1675	TBIM001675	Bsv0100-00001717-RA	-	9	3.69506	3.81904	5.68016	5.21861	4.88585	4.38688	12.1006	6.29384	5.7067
1676	TBIM001676	Bsv0100-00001718-RA	-	9	4.76166	7.21553	8.17562	9.59145	9.43255	6.30058	21.5758	8.9665	7.89946
1677	TBIM001677	Bsv0100-00001719-RA	-	9	0	0	0	0	0	0	0	0	0
1678	TBIM001678	Bsv0100-00001720-RA	-	9	61.392	0	75.0912	0	0	174.402	0	162.198	103.975
1679	TBIM001679	Bsv0100-00001721-RA	-	9	0	0	0.0363604	0	0.034821	0.0417572	0	0	0
1680	TBIM001680	Bsv0100-00001722-RA	-	9	0	0	0	0	0	0	0	0	0
1681	TBIM001681	Bsv0100-00001723-RA	-	9	63.2701	49.0289	50.4435	47.1327	76.4414	66.0262	21.2143	52.6363	113.144
1682	TBIM001682	Bsv0100-00001724-RA	Probable nucleoredoxin 1 [Source:SWISS;Acc:O80763]	9	1.74371	1.37909	1.0325	0.715373	0.986516	0.819629	0.466033	0.569889	0.452208
1683	TBIM001683	Bsv0100-00001725-RA	APO protein 3, mitochondrial [Source:SWISS;Acc:Q9FH50]	9	7.66529	7.10341	5.97812	6.4584	5.79427	5.11152	4.81881	4.37406	4.1153
1684	TBIM001684	Bsv0100-00001726-RA	-	9	0	0	0	0	0	0	0	0	0
1685	TBIM001685	Bsv0100-00001727-RA	-	9	0	0	0	0	0	0.0602709	0	0	0.0900664
1686	TBIM001686	Bsv0100-00001728-RA	Putative ribonuclease H protein At1g65750 [Source:SWISS;Acc:P0C2F6]	9	0	0	0	0	0	0	0	0	0
1687	TBIM001687	Bsv0100-00001729-RA	Uncharacterized WD repeat-containing protein alr3466 [Source:SWISS;Acc:Q8YRI1]	9	12.8984	12.8597	14.6588	12.0625	10.6724	11.5785	10.9869	12.2041	10.7808
1688	TBIM001688	Bsv0100-00001730-RA	Protein BONZAI 1 [Source:SWISS;Acc:Q941L3]	9	13.9647	14.2094	16.6122	12.4108	14.2268	14.534	11.1838	10.8636	8.54591
1689	TBIM001689	Bsv0100-00001731-RA	Heat shock 70 kDa protein 5 [Source:SWISS;Acc:Q9S9N1]	9	0	0	0	0	0	0	0	0	0
1690	TBIM001690	Bsv0100-00001732-RA	Ethylene-responsive transcription factor ERF114 [Source:SWISS;Acc:Q9FH54]	9	0	0	0	0	0	0	0	0	0
1691	TBIM001691	Bsv0100-00001733-RA	E3 ubiquitin-protein ligase ORTHRUS 2 [Source:SWISS;Acc:Q8VYZ0]	9	48.3859	46.6507	66.8449	28.0505	28.0892	21.5976	4.4832	9.36068	9.85675
1692	TBIM001692	Bsv0100-00001734-RA	Glycine--tRNA ligase 1, mitochondrial [Source:SWISS;Acc:O23627]	9	53.3342	53.8315	55.1655	46.9779	45.2389	45.2528	27.281	27.8183	26.6158
1693	TBIM001693	Bsv0100-00001735-RA	Protein UNIFOLIATA [Source:SWISS;Acc:O48559]	9	0.178394	0.382007	0.490249	0.0574413	0.027401	0	0	0.025314	0
1694	TBIM001694	Bsv0100-00001736-RA	Pentatricopeptide repeat-containing protein At5g50990 [Source:SWISS;Acc:Q9FI49]	9	1.7413	1.43194	2.18839	1.71092	1.7428	1.29023	0.765537	0.6328	0.963154
1695	TBIM001695	Bsv0100-00001737-RA	Random slug protein 5 [Source:SWISS;Acc:Q55CU8]	9	42.0577	42.5769	48.9366	36.0846	33.1128	33.3529	13.8171	16.9779	13.0159
1696	TBIM001696	Bsv0100-00001738-RA	Random slug protein 5 [Source:SWISS;Acc:Q55CU8]	9	43.3725	47.4707	40.4953	34.3925	30.1302	29.2106	16.8616	14.3261	11.4684
1697	TBIM001697	Bsv0100-00001739-RA	Probable beta-1,4-xylosyltransferase IRX10L [Source:SWISS;Acc:Q940Q8]	9	17.7961	17.2172	18.3568	16.1904	14.8054	17.0194	11.9988	8.38255	7.33436
1698	TBIM001698	Bsv0100-00001740-RA	Rubredoxin [Source:SWISS;Acc:P24297]	9	121.883	121.797	144.641	169.319	148.556	244.227	125.238	293.397	231.317
1699	TBIM001699	Bsv0100-00001741-RA	None [Source:SWISS;Acc:Q9FI46]	9	14.0061	14.7986	17.5553	14.3524	13.4404	17.8007	17.6074	18.7359	18.4771
1700	TBIM001700	Bsv0100-00001742-RA	-	9	0	0	0	0	0	0	0	0	0
1701	TBIM001701	Bsv0100-00001743-RA	-	9	19.541	19.2658	18.7122	19.9937	15.6577	23.5254	15.6259	24.2312	42.5833
1702	TBIM001702	Bsv0100-00001744-RA	Carbonyl reductase [NADPH] 1 [Source:SWISS;Acc:P48758]	9	5.57684	4.94554	5.41765	3.43736	4.06268	3.22844	2.09989	2.56047	2.0723
1703	TBIM001703	Bsv0100-00001745-RA	-	9	57.9164	58.3793	60.7072	85.093	81.1989	87.6403	162.564	154.658	144.988
1704	TBIM001704	Bsv0100-00001746-RA	-	9	0	0	0	0	0	0	0	0	0
1705	TBIM001705	Bsv0100-00001747-RA	Shikimate O-hydroxycinnamoyltransferase [Source:SWISS;Acc:Q9FI78]	9	0.0498631	0.0478066	0	0	0.109194	0	0	0	0
1706	TBIM001706	Bsv0100-00001748-RA	Anthranilate N-benzoyltransferase protein 2 [Source:SWISS;Acc:O23917]	9	82.6575	87.9685	46.45	63.9069	57.0301	30.526	2.52933	1.43627	1.27191
1707	TBIM001707	Bsv0100-00001749-RA	-	9	0	0	0	0	0	0	0	0	0
1708	TBIM001708	Bsv0100-00001750-RA	Endoglucanase 8 [Source:SWISS;Acc:Q9CAC1]	9	0	0	0	0	0	0	0	0	0
1709	TBIM001709	Bsv0100-00001751-RA	-	9	0.220793	0.105567	0.062206	0	0.06026	0	0.289443	0.333896	0.203621
1710	TBIM001710	Bsv0100-00001752-RA	Calnexin homolog [Source:SWISS;Acc:Q39817]	9	68.1967	68.8186	73.05	58.2193	56.7656	54.6305	30.1646	26.05	26.7671
1711	TBIM001711	Bsv0100-00001753-RA	Glutamyl-tRNA(Gln) amidotransferase subunit A [Source:SWISS;Acc:B2V855]	9	6.98334	6.33562	6.90845	4.98307	4.445	2.76778	5.44634	4.86526	4.22487
1712	TBIM001712	Bsv0100-00001754-RA	Mediator of RNA polymerase II transcription subunit 11 [Source:SWISS;Acc:Q6ID77]	9	0	0	0	0	0	0	0	0	0
1713	TBIM001713	Bsv0100-00001755-RA	-	9	19.2311	19.1677	16.2398	16.3336	14.247	8.40645	15.1915	12.0463	4.30086
1714	TBIM001714	Bsv0100-00001756-RA	-	9	0	0	0.274467	0	0	0	0	0	0
1715	TBIM001715	Bsv0100-00001757-RA	-	9	8.35265	8.00073	9.96774	6.834	6.62587	5.82979	4.20322	2.90687	3.14355
1716	TBIM001716	Bsv0100-00001758-RA	-	9	0	0	0	0	0	0	0	0	0
1717	TBIM001717	Bsv0100-00001759-RA	-	9	0	0	0	0	0	0	0	0	0
1718	TBIM001718	Bsv0100-00001760-RA	Gastric triacylglycerol lipase [Source:SWISS;Acc:P80035]	9	21.755	21.1926	20.9737	24.9254	23.8063	20.2382	17.9806	15.4452	15.7862
1719	TBIM001719	Bsv0100-00001761-RA	Protein FAR1-RELATED SEQUENCE 6 [Source:SWISS;Acc:Q9SSQ4]	9	0	0	0	0	0	0	0	0	0
1720	TBIM001720	Bsv0100-00001762-RA	-	9	0	0	0	0	0	0	0	0	0
1721	TBIM001721	Bsv0100-00001763-RA	-	9	0	0	0	0	0	0	0	0	0
1722	TBIM001722	Bsv0100-00001764-RA	-	9	0.858721	0.633852	0.110896	0.887404	0.82313	0.0644623	0.379567	0.0513271	0
1723	TBIM001723	Bsv0100-00001765-RA	-	9	0	0	0	0	0	0	0	0	0
1724	TBIM001724	Bsv0100-00001766-RA	-	9	1.71733	1.4963	2.46139	2.11734	1.79491	4.60715	1.17854	2.4675	3.39007
1725	TBIM001725	Bsv0100-00001767-RA	-	9	0	0	0	0	0	0	0	0	0
1726	TBIM001726	Bsv0100-00001768-RA	Protein FAR1-RELATED SEQUENCE 5 [Source:SWISS;Acc:Q9SZL8]	9	0	0	0	0	0	0	0	0	0
1727	TBIM001727	Bsv0100-00001769-RA	Histone deacetylase 15 [Source:SWISS;Acc:Q8GXJ1]	9	23.8898	24.1338	28.2151	20.388	20.3369	21.1633	13.6865	15.1159	12.9497
1728	TBIM001728	Bsv0100-00001770-RA	Protein DENND6A [Source:SWISS;Acc:Q8IWF6]	9	14.7349	15.7695	15.0402	13.5547	11.6794	11.3226	10.84	8.67431	7.58784
1729	TBIM001729	Bsv0100-00001771-RA	Leucoanthocyanidin reductase [Source:SWISS;Acc:Q84V83]	9	0	0.0499819	0.298942	0	0.114856	0	0.0558251	0.155657	0.544493
1730	TBIM001730	Bsv0100-00001772-RA	E3 ubiquitin-protein ligase XIAP [Source:SWISS;Acc:Q5BKL8]	9	10.665	11.3646	11.8121	9.55811	9.90692	7.45561	22.4009	6.7998	6.14395
1731	TBIM001731	Bsv0100-00001773-RA	LINE-1 reverse transcriptase homolog [Source:SWISS;Acc:P08548]	9	0	0	0	0.0216988	0.0209281	0	0	0	0
1732	TBIM001732	Bsv0100-00001774-RA	-	9	0	0	0	0	0	0	0	0	0
1733	TBIM001733	Bsv0100-00001775-RA	-	9	0	0	0	0	0	0	0	0	0
1734	TBIM001734	Bsv0100-00001776-RA	-	9	0	0	0	0	0	0	0	0	0
1735	TBIM001735	Bsv0100-00001777-RA	-	9	0	0	0	0	0	0	0	0	0
1736	TBIM001736	Bsv0100-00001778-RA	-	9	0	0	0	0	0	0	0	0	0
1737	TBIM001737	Bsv0100-00001779-RA	-	9	0	0	0	0	0	0	0	0	0
1738	TBIM001738	Bsv0100-00001780-RA	-	9	0	0	0	0	0	0	0	0	0
1739	TBIM001739	Bsv0100-00001781-RA	DNA mismatch repair protein MSH2 [Source:SWISS;Acc:O24617]	9	14.3757	13.6802	25.0056	7.98938	7.57944	10.1883	2.57201	3.5671	3.58029
1740	TBIM001740	Bsv0100-00001782-RA	-	9	0	0.0745938	0	0	0.0869647	0	0	0	0
1741	TBIM001741	Bsv0100-00001783-RA	Pentatricopeptide repeat-containing protein At2g17670 [Source:SWISS;Acc:Q84J71]	9	5.63886	5.13272	5.34671	5.47049	6.19298	3.65355	4.76372	3.77698	3.39184
1742	TBIM001742	Bsv0100-00001784-RA	Probable acyl-activating enzyme 1, peroxisomal [Source:SWISS;Acc:F4HUK6]	9	2.1807	2.22155	0.491787	7.07548	5.85281	0.473422	1.06939	0	0
1743	TBIM001743	Bsv0100-00001785-RA	None [Source:SWISS;Acc:Q9SD04]	9	13.3936	13.3492	9.3709	15.5699	17.3167	12.4421	24.5187	9.53819	8.92877
1744	TBIM001744	Bsv0100-00001786-RA	Protein YLS2 [Source:SWISS;Acc:Q9CAZ7]	9	0.672508	0.353583	0.845343	0.638375	1.00786	1.37319	0.497442	0.767201	0.368347
1745	TBIM001745	Bsv0100-00001787-RA	None [Source:SWISS;Acc:Q9SD05]	9	0	0.280802	0	0.171131	0.160574	0.583463	0	0.150602	0.26072
1746	TBIM001746	Bsv0100-00001788-RA	Probable acyl-activating enzyme 2 [Source:SWISS;Acc:Q9SEY5]	9	18.0491	18.5617	18.1359	16.9634	15.1215	11.0882	13.8344	11.0153	11.438
1747	TBIM001747	Bsv0100-00001789-RA	-	9	1.26009	0.593324	0.714691	0.238331	0.226518	0.5501	1.31678	0	0.381954
1748	TBIM001748	Bsv0100-00001790-RA	Isocitrate dehydrogenase [NAD] regulatory subunit 3, mitochondrial [Source:SWISS;Acc:O81796]	9	8.74662	8.77327	12.3358	11.0561	11.1318	11.1724	7.98734	7.87923	6.60994
1749	TBIM001749	Bsv0100-00001791-RA	CASP-like protein VIT_14s0068g01400 [Source:SWISS;Acc:A7PA04]	9	0	0	0	0	0	0	0	0	0
1750	TBIM001750	Bsv0100-00001792-RA	None [Source:SWISS;Acc:I7CT85]	9	0	0	0	0	0	0	0.0959211	0	0
1751	TBIM001751	Bsv0100-00001793-RA	None [Source:SWISS;Acc:I7C6E8]	9	0.0466194	0.0907307	0.0537748	0	0	0	0	0	0
1752	TBIM001752	Bsv0100-00001794-RA	-	9	2.78893	1.99394	1.09991	3.14159	3.54154	1.12983	20.8794	4.01643	4.30171
1753	TBIM001753	Bsv0100-00001795-RA	Zinc finger protein CONSTANS-LIKE 14 [Source:SWISS;Acc:O22800]	9	11.8159	10.2919	8.49758	14.5671	18.2569	10.2424	24.1382	10.8696	9.08733
1754	TBIM001754	Bsv0100-00001796-RA	Translocon-associated protein subunit beta [Source:SWISS;Acc:P43308]	9	32.0678	33.5149	33.7622	32.2083	27.002	30.871	15.3339	15.917	14.7036
1755	TBIM001755	Bsv0100-00001797-RA	-	9	29.4113	29.5094	27.9567	30.5873	30.0398	29.0078	37.224	38.7543	26.6587
1756	TBIM001756	Bsv0100-00001798-RA	Protein AUXIN SIGNALING F-BOX 3 [Source:SWISS;Acc:Q9LPW7]	9	9.63808	9.9801	12.8879	8.04297	7.80971	10.0422	5.90063	5.86255	4.93905
1757	TBIM001757	Bsv0100-00001799-RA	B3 domain-containing transcription factor FUS3 [Source:SWISS;Acc:Q9LW31]	9	1.15721	0.919224	0.648114	1.27276	0.888621	0.396095	0.318301	0.349768	0.465459
1758	TBIM001758	Bsv0100-00001800-RA	Mitochondrial phosphate carrier protein 3, mitochondrial [Source:SWISS;Acc:Q9FMU6]	9	123.842	117.998	138.765	127.976	127.935	189.774	197.489	253.222	195.855
1759	TBIM001759	Bsv0100-00001801-RA	-	9	0.241082	0	0.282717	0	0	0.323446	0.259405	0.247241	0.216745
1760	TBIM001760	Bsv0100-00001802-RA	Pentatricopeptide repeat-containing protein At3g26782, mitochondrial [Source:SWISS;Acc:Q9LW32]	9	0.576079	0.319858	0.504767	0.346658	0.434763	0.162946	0.222115	0.359009	0.416074
1761	TBIM001761	Bsv0100-00001803-RA	-	9	5.89553	7.08331	10.121	3.21596	4.36346	4.19357	0.465522	1.01159	1.63064
1762	TBIM001762	Bsv0100-00001804-RA	2,3-bisphosphoglycerate-dependent phosphoglycerate mutase [Source:SWISS;Acc:Q8L1Z7]	9	1.3965	1.48866	2.28671	1.33099	1.35027	1.66263	1.34596	1.16424	0.94263
1763	TBIM001763	Bsv0100-00001805-RA	Spermidine hydroxycinnamoyl transferase [Source:SWISS;Acc:O64470]	9	0	0	0	0	0	0	0	0	0
1764	TBIM001764	Bsv0100-00001806-RA	Short-chain dehydrogenase reductase 2a [Source:SWISS;Acc:Q9SCU0]	9	1.2002	2.37883	2.38332	0.713813	0.811487	1.79806	2.00044	1.80815	1.31431
1765	TBIM001765	Bsv0100-00001807-RA	54S ribosomal protein L24, mitochondrial [Source:SWISS;Acc:P36525]	9	10.8364	11.4449	15.9527	9.80049	11.1242	11.6233	7.00084	7.5803	6.48618
1766	TBIM001766	Bsv0100-00001808-RA	-	9	12.8783	12.6425	14.2695	9.81821	12.784	10.0297	7.6742	11.0439	7.58435
1767	TBIM001767	Bsv0100-00001809-RA	Putative pentatricopeptide repeat-containing protein At2g01510 [Source:SWISS;Acc:Q9S7F4]	9	1.12316	1.13174	1.06757	1.00426	1.05384	1.42252	0.597677	1.08123	0.655447
1768	TBIM001768	Bsv0100-00001810-RA	RING finger protein 10 [Source:SWISS;Acc:Q32NQ8]	9	27.4882	28.3094	29.0175	21.8555	23.8179	22.1723	24.8262	25.4214	23.4632
1769	TBIM001769	Bsv0100-00001811-RA	-	9	0.914306	0.9754	0.819002	0.941619	0.803161	1.29343	0.534216	0.926579	0.726978
1770	TBIM001770	Bsv0100-00001812-RA	Probable WRKY transcription factor 4 [Source:SWISS;Acc:Q9XI90]	9	3.76015	3.73793	3.8392	2.96212	2.92342	3.0639	2.1854	1.94271	2.32652
1771	TBIM001771	Bsv0100-00001813-RA	WRKY transcription factor 44 [Source:SWISS;Acc:Q9ZUU0]	9	0	0	0	0	0	0	0	0.258463	0
1772	TBIM001772	Bsv0100-00001814-RA	-	9	2.72365	2.26635	2.59352	2.73539	3.26745	2.52003	2.28635	1.30792	2.03327
1773	TBIM001773	Bsv0100-00001815-RA	Light-regulated protein [Source:SWISS;Acc:Q03200]	9	251.842	213.934	29.7829	341.848	293.828	81.9036	455.974	354.915	611.079
1774	TBIM001774	Bsv0100-00001816-RA	Lysosomal alpha-mannosidase [Source:SWISS;Acc:Q8VHC8]	9	36.8504	34.3001	19.6679	35.2443	35.8868	14.4964	8.10443	6.35038	5.96294
1775	TBIM001775	Bsv0100-00001817-RA	Lysosomal alpha-mannosidase [Source:SWISS;Acc:Q60HE9]	9	3.96713	4.11488	4.2719	3.21141	2.90771	2.39511	1.88354	2.61129	2.91798
1776	TBIM001776	Bsv0100-00001818-RA	-	9	4.80487	5.61565	5.27474	3.47286	3.05952	2.68582	3.63401	3.48771	2.34584
1777	TBIM001777	Bsv0100-00001819-RA	Histone-lysine N-methyltransferase, H3 lysine-9 specific SUVH4 [Source:SWISS;Acc:Q8GZB6]	9	2.52424	2.42668	3.29884	1.75434	2.02594	2.476	1.35094	1.3686	1.84501
1778	TBIM001778	Bsv0100-00001820-RA	B2 protein [Source:SWISS;Acc:P37707]	9	6.6975	6.56493	8.59955	5.73231	5.12396	5.11323	2.7165	2.85792	2.32464
1779	TBIM001779	Bsv0100-00001821-RA	-	9	0.103586	0.196432	0	0.119637	0.337446	0.136358	0	0	0
1780	TBIM001780	Bsv0100-00001822-RA	-	9	0.0737957	0.13929	0.170692	0.16814	0.242396	0	0	0.145295	0.136156
1781	TBIM001781	Bsv0100-00001823-RA	Probable leucine-rich repeat receptor-like protein kinase At5g49770 [Source:SWISS;Acc:Q9LT96]	9	1.54926	1.42875	3.18996	1.20521	0.91067	1.63735	2.74574	2.62589	1.87514
1782	TBIM001782	Bsv0100-00001824-RA	Probable leucine-rich repeat receptor-like protein kinase At5g49770 [Source:SWISS;Acc:Q9LT96]	9	0.0175482	0.0334223	0.0808765	0.0590104	0.0951409	0.138471	0	0.0171889	0.029923
1783	TBIM001783	Bsv0100-00001825-RA	-	9	18.1882	14.1731	17.7701	11.5294	11.7032	13.1102	7.73687	9.74788	9.10209
1784	TBIM001784	Bsv0100-00001826-RA	-	9	0.719421	0.632753	0.645549	0.627613	0.484839	0.22074	0.176752	0.167966	0.203249
1785	TBIM001785	Bsv0100-00001827-RA	Choline monooxygenase, chloroplastic [Source:SWISS;Acc:O22553]	9	0	0	0	0	0.0354303	0.126681	0.0340991	0.0977217	0.170676
1786	TBIM001786	Bsv0100-00001828-RA	Glutathione S-transferase zeta class [Source:SWISS;Acc:P57108]	9	20.5622	21.2459	20.1743	22.4034	21.5937	20.8138	25.3241	29.6144	21.6865
1787	TBIM001787	Bsv0100-00001829-RA	Ferric reduction oxidase 6 [Source:SWISS;Acc:Q8RWS6]	9	1.63983	1.51016	4.02941	1.05947	0.810527	3.82337	0.330889	13.1417	15.037
1788	TBIM001788	Bsv0100-00001830-RA	Endoglucanase 25 [Source:SWISS;Acc:Q38890]	9	20.525	20.3556	29.1363	20.3134	19.6764	21.7203	11.9954	13.0396	14.419
1789	TBIM001789	Bsv0100-00001831-RA	None [Source:SWISS;Acc:Q9C811]	9	6.36149	6.3891	6.6838	6.29932	5.62094	4.51792	2.33502	2.59601	3.30466
1790	TBIM001790	Bsv0100-00001832-RA	TVP38/TMEM64 family membrane protein slr0305 [Source:SWISS;Acc:Q55909]	9	7.29242	8.77832	9.37759	7.61271	6.02986	8.73856	6.79217	8.88682	7.84039
1791	TBIM001791	Bsv0100-00001833-RA	MLO-like protein 13 [Source:SWISS;Acc:Q94KB2]	9	0.102216	0.326902	0.117494	0.153919	0.148914	0.224616	0.0721101	0.134808	0.0560533
1792	TBIM001792	Bsv0100-00001834-RA	Uncharacterized hydrolase YugF [Source:SWISS;Acc:O05235]	9	20.41	23.6861	24.932	34.3688	32.0785	42.2882	59.3868	57.7067	41.2837
1793	TBIM001793	Bsv0100-00001835-RA	T-complex protein 1 subunit alpha [Source:SWISS;Acc:P28769]	9	72.7031	77.1166	77.4886	64.7503	63.2653	59.6143	31.8849	30.5128	30.4437
1794	TBIM001794	Bsv0100-00001836-RA	Transportin-3 [Source:SWISS;Acc:Q6P2B1]	9	0.461858	0.437248	0.495508	0.852494	0.502489	0.451616	0.70055	0.40621	0.344657
1795	TBIM001795	Bsv0100-00001837-RA	Monothiol glutaredoxin-S14, chloroplastic [Source:SWISS;Acc:Q84Y95]	9	13.4274	13.3317	14.6259	15.5432	15.1639	18.73	21.7205	25.6461	18.6222
1796	TBIM001796	Bsv0100-00001838-RA	DNA repair helicase UVH6 [Source:SWISS;Acc:Q8W4M7]	9	0.598677	0.250276	0.604756	0.214682	0.285978	0.474274	0.224591	0.374449	0.0789459
1797	TBIM001797	Bsv0100-00001839-RA	Pre-mRNA-splicing factor 38B [Source:SWISS;Acc:Q80SY5]	9	13.1874	13.6705	14.1877	12.8504	11.6912	10.5176	9.91821	7.65631	7.41329
1798	TBIM001798	Bsv0100-00001840-RA	Prohibitin-3, mitochondrial [Source:SWISS;Acc:O04331]	9	45.2376	49.9172	45.112	41.4945	40.2579	39.9895	22.0764	22.8544	23.898
1799	TBIM001799	Bsv0100-00001841-RA	Trimethylguanosine synthase [Source:SWISS;Acc:P85107]	9	0.900485	1.01782	0.987615	0.725956	1.16363	0.694247	0.27677	0.310859	0.278243
1800	TBIM001800	Bsv0100-00001842-RA	-	9	0.556501	0	0.650235	0	0.30738	0	0	0	0
1801	TBIM001801	Bsv0100-00001843-RA	Acetate--CoA ligase ACS, chloroplastic/glyoxysomal [Source:SWISS;Acc:B9DGD6]	9	18.1609	18.9027	19.877	19.1105	18.9585	21.4701	29.2462	26.8668	25.676
1802	TBIM001802	Bsv0100-00001844-RA	Acetate--CoA ligase ACS, chloroplastic/glyoxysomal [Source:SWISS;Acc:B9DGD6]	9	0	0	0	0	0	0	0	0	0
1803	TBIM001803	Bsv0100-00001845-RA	-	9	0	0	0	0	0	0	0	0	0
1804	TBIM001804	Bsv0100-00001846-RA	WD repeat-containing protein LWD1 [Source:SWISS;Acc:Q9LPV9]	9	0	0	0	0	0	0	0	0	0
1805	TBIM001805	Bsv0100-00001847-RA	WD repeat-containing protein LWD1 [Source:SWISS;Acc:Q9LPV9]	9	0	0	0	0	0	0	0	0	0
1806	TBIM001806	Bsv0100-00001848-RA	OTU domain-containing protein DDB_G0284757 [Source:SWISS;Acc:Q54P70]	9	0.430393	0.644265	0.725492	0.324944	0.943628	0.379243	1.10312	0.793237	1.49386
1807	TBIM001807	Bsv0100-00001849-RA	Staphylococcal nuclease domain-containing protein 1 [Source:SWISS;Acc:Q78PY7]	9	17.2713	17.7207	18.68	17.7163	16.6686	15.5557	9.96322	9.29699	8.33547
1808	TBIM001808	Bsv0100-00001850-RA	-	9	0	0	0	0	0	0	0	0	0
1809	TBIM001809	Bsv0100-00001851-RA	-	9	11.5456	3.81634	9.82732	13.3643	7.61945	6.71952	10.834	6.52307	17.1547
1810	TBIM001810	Bsv0100-00001852-RA	-	9	0.390858	0.378725	0.311844	0	0.439963	0.345775	0.139041	0	0.433507
1811	TBIM001811	Bsv0100-00001853-RA	None [Source:SWISS;Acc:Q8RWF4]	9	6.38718	5.73825	5.8258	5.59756	5.30318	5.51845	4.2264	3.73444	3.71138
1812	TBIM001812	Bsv0100-00001854-RA	DNA cross-link repair protein SNM1 [Source:SWISS;Acc:Q38961]	9	0.33839	0.476206	0.783176	0.283385	0.372772	0.485242	0.560825	0.306437	0.104033
1813	TBIM001813	Bsv0100-00001855-RA	-	9	25.1099	26.6418	31.4432	26.0975	24.2206	23.6966	16.753	16.7744	10.5002
1814	TBIM001814	Bsv0100-00001856-RA	Syntaxin-22 [Source:SWISS;Acc:P93654]	9	2.71529	4.25796	2.90097	3.3099	3.02916	2.70197	5.67533	3.54612	5.43175
1815	TBIM001815	Bsv0100-00001857-RA	Transcription-repair-coupling factor [Source:SWISS;Acc:Q55750]	9	1.96976	2.02479	1.59701	2.33655	2.30149	1.78662	2.75613	1.63014	1.85071
1816	TBIM001816	Bsv0100-00001858-RA	Lipid transfer-like protein VAS [Source:SWISS;Acc:Q9FFY3]	9	0.265682	0.639222	0.456428	0.608532	0.440077	0	0	0.132932	0
1817	TBIM001817	Bsv0100-00001859-RA	Potassium transporter 4 [Source:SWISS;Acc:Q9LD18]	9	3.44727	2.91767	2.9097	3.4755	3.2869	2.48315	6.67821	3.59944	3.01048
1818	TBIM001818	Bsv0100-00001860-RA	Ethylene-responsive transcription factor LEP [Source:SWISS;Acc:Q9M644]	9	0	0	0	0	0	0	0	0	0
1819	TBIM001819	Bsv0100-00001861-RA	Chaperonin 60 subunit alpha 2, chloroplastic [Source:SWISS;Acc:Q56XV8]	9	7.18223	6.99513	9.15677	5.66782	5.85581	7.45786	4.07342	4.89125	5.09329
1820	TBIM001820	Bsv0100-00001862-RA	Nudix hydrolase 13, mitochondrial [Source:SWISS;Acc:Q52K88]	9	27.4235	26.3236	9.39869	25.6852	25.7187	10.3951	58.9269	19.1352	16.1276
1821	TBIM001821	Bsv0100-00001863-RA	Probable 3-deoxy-D-manno-octulosonic acid transferase, mitochondrial [Source:SWISS;Acc:Q8VZA5]	9	9.30419	7.71848	7.8907	7.24696	6.00832	6.15755	3.45745	4.40102	4.18168
1822	TBIM001822	Bsv0100-00001864-RA	40S ribosomal protein S27-2 [Source:SWISS;Acc:Q9M2F1]	9	897.522	827.374	1003.77	614.335	691.424	869.112	330.573	546.229	420.123
1823	TBIM001823	Bsv0100-00001865-RA	Calcium-binding mitochondrial carrier protein SCaMC-2-B [Source:SWISS;Acc:A2CEQ0]	9	18.0463	17.1195	18.7943	17.0207	16.6084	17.0464	10.5672	12.6258	14.748
1824	TBIM001824	Bsv0100-00001866-RA	-	9	9.01985	10.2354	5.43726	4.05688	4.83572	3.2904	1.67805	1.70702	1.83288
1825	TBIM001825	Bsv0100-00001867-RA	-	9	7.16094	6.96921	6.39988	3.142	3.49481	2.35901	0.741523	0.421737	0.472787
1826	TBIM001826	Bsv0100-00001868-RA	-	9	7.78603	8.49719	7.37651	2.97678	3.02849	1.4158	0.433816	0.469325	0.652675
1827	TBIM001827	Bsv0100-00001869-RA	Chalcone synthase [Source:SWISS;Acc:Q9LKP7]	9	2.10033	2.36611	8.25196	3.06624	3.06226	11.0065	0.030964	0.510403	0.0567535
1828	TBIM001828	Bsv0100-00001870-RA	Chalcone synthase [Source:SWISS;Acc:Q9LKP7]	9	129.743	132.374	277.782	177.232	176.481	363.661	22.7229	156.66	132.469
1829	TBIM001829	Bsv0100-00001871-RA	-	9	0	0	0	0	0	0	0	0	0
1830	TBIM001830	Bsv0100-00001872-RA	Cytochrome b559 subunit alpha [Source:SWISS;Acc:P69383]	9	1.03431	0	0	0	0	0	1.17188	1.10959	0
1831	TBIM001831	Bsv0100-00001873-RA	Cytochrome b559 subunit beta [Source:SWISS;Acc:Q7IW43]	9	0	0	0	0	0	0	0	0	0
1832	TBIM001832	Bsv0100-00001874-RA	50S ribosomal protein L7/L12 [Source:SWISS;Acc:B3EER1]	9	62.6997	62.5497	69.0831	50.4638	51.2729	59.2517	35.0798	45.137	34.5427
1833	TBIM001833	Bsv0100-00001875-RA	Probable glutathione S-transferase parA [Source:SWISS;Acc:P25317]	9	0	0	0.0969045	0	0.0905783	0	0	0	0
1834	TBIM001834	Bsv0100-00001876-RA	Glutathione S-transferase U28 [Source:SWISS;Acc:Q9C8M3]	9	0	0.189683	0.232401	0	0	0.253904	0	0	0
1835	TBIM001835	Bsv0100-00001877-RA	Probable glutathione S-transferase parA [Source:SWISS;Acc:P25317]	9	0.19448	0.191088	0.585095	0.337652	0.544226	0.257234	2.55482	1.14226	2.26103
1836	TBIM001836	Bsv0100-00001878-RA	Double-stranded RNA-binding protein 4 [Source:SWISS;Acc:Q8H1D4]	9	13.3801	13.749	12.0473	14.0874	11.5183	9.21998	9.61195	5.8466	4.38811
1837	TBIM001837	Bsv0100-00001879-RA	-	9	7.50061	6.10776	16.555	11.9201	17.058	1.47218	8.32057	0	5.96943
1838	TBIM001838	Bsv0100-00001880-RA	Double-stranded RNA-binding protein 4 [Source:SWISS;Acc:Q8H1D4]	9	28.157	23.2968	26.2132	21.9071	26.8498	15.5717	15.1796	10.2831	7.5974
1839	TBIM001839	Bsv0100-00001881-RA	-	9	0	0	0	0	0	0	0	0	0
1840	TBIM001840	Bsv0100-00001882-RA	LRR receptor-like serine/threonine-protein kinase RPK2 [Source:SWISS;Acc:Q9S7I6]	9	7.90259	7.61314	9.04801	5.61008	6.04744	4.79303	1.61135	2.06515	1.97569
1841	TBIM001841	Bsv0100-00001883-RA	-	9	1.27665	1.4829	1.28276	0.940464	1.15634	1.75559	1.16174	1.48856	2.37859
1842	TBIM001842	Bsv0100-00001884-RA	-	9	39.8636	39.9379	38.6989	41.0488	37.446	40.4364	21.7406	26.7149	21.1482
1843	TBIM001843	Bsv0100-00001885-RA	-	9	46.8261	50.1309	37.8629	63.1051	50.7853	62.0133	66.5964	73.3939	97.7329
1844	TBIM001844	Bsv0100-00001886-RA	Cytochrome b-c1 complex subunit Rieske, mitochondrial [Source:SWISS;Acc:P37841]	9	125.852	137.501	147.207	143.844	132.116	127.567	132.133	123.69	104.896
1845	TBIM001845	Bsv0100-00001887-RA	F-box/LRR-repeat protein At3g59200 [Source:SWISS;Acc:Q9LX51]	9	2.61452	2.44899	1.53099	1.45862	2.26012	1.27131	3.34826	1.67804	1.1427
1846	TBIM001846	Bsv0100-00001888-RA	N-alpha-acetyltransferase MAK3 [Source:SWISS;Acc:O80438]	9	41.9847	44.4032	50.2552	46.4509	45.5634	67.1378	35.119	63.6548	40.3151
1847	TBIM001847	Bsv0100-00001889-RA	Probable leucine-rich repeat receptor-like protein kinase At5g49770 [Source:SWISS;Acc:Q9LT96]	9	0.322172	0.465157	0.522532	0.351961	0.338498	0.366051	0.0432209	0.0712875	0.0549375
1848	TBIM001848	Bsv0100-00001890-RA	PCTP-like protein [Source:SWISS;Acc:Q9JMD3]	9	0.68335	0.956053	2.24166	1.6052	1.21102	2.22588	2.40526	6.5226	5.10176
1849	TBIM001849	Bsv0100-00001891-RA	Cinnamoyl-CoA reductase 1 [Source:SWISS;Acc:Q9S9N9]	9	2.04358	1.40043	2.69856	3.00393	2.12546	3.22403	4.87109	4.10636	4.08449
1850	TBIM001850	Bsv0100-00001892-RA	Uncharacterized protein At4g37920, chloroplastic [Source:SWISS;Acc:Q84WN0]	9	2.24604	2.03822	1.90543	2.60993	2.21998	2.45816	2.81882	2.61571	3.7749
1851	TBIM001851	Bsv0100-00001893-RA	NADH dehydrogenase [ubiquinone] 1 beta subcomplex subunit 3-B [Source:SWISS;Acc:Q9M9R9]	9	0	0	0	0	0	0	0	0	0
1852	TBIM001852	Bsv0100-00001894-RA	-	9	2.31902	2.37388	2.59838	1.82239	3.12764	2.28433	1.46661	2.53675	4.2912
1853	TBIM001853	Bsv0100-00001895-RA	Putative NAC domain-containing protein 94 [Source:SWISS;Acc:Q9FIW5]	9	5.76213	5.6608	5.41402	7.00018	6.80502	6.10296	4.26206	5.11594	3.00881
1854	TBIM001854	Bsv0100-00001896-RA	Pentatricopeptide repeat-containing protein At1g14470 [Source:SWISS;Acc:Q9M9R6]	9	0.221387	0.372175	0.268157	0.0958367	0.246692	0.224396	0.116772	0.219579	0.339931
1855	TBIM001855	Bsv0100-00001897-RA	None [Source:SWISS;Acc:Q9SY73]	9	35.256	37.9221	37.2518	41.0821	41.9745	43.4546	52.7447	40.5724	32.1095
1856	TBIM001856	Bsv0100-00001589-RA	Auxin transporter-like protein 2 [Source:SWISS;Acc:Q9S836]	9	17.367	18.0688	34.6721	12.3484	12.4948	17.3072	3.50393	7.137	6.98065
1857	TBIM001857	Bsv0100-00001590-RA	Thaumatin-like protein 1a [Source:SWISS;Acc:Q9FSG7]	9	14.018	14.5463	19.2671	10.55	9.77771	11.5096	8.03794	10.3338	8.56403
1858	TBIM001858	Bsv0100-00001591-RA	-	9	1.14789	0.498271	1.77745	0.747535	1.50682	1.08401	0.109981	0.426263	1.26755
1859	TBIM001859	Bsv0100-00001592-RA	-	9	3.64812	2.38903	7.79107	3.04104	3.96451	3.83225	1.91041	3.44117	4.86059
1860	TBIM001860	Bsv0100-00001593-RA	-	9	1.1565	0.781245	3.17476	1.14712	2.52281	3.44413	0.712294	2.02866	3.58434
1861	TBIM001861	Bsv0100-00001594-RA	-	9	0.938173	0.455958	0.730943	0.561159	0.762803	1.34977	0.433931	0.479147	3.67135
1862	TBIM001862	Bsv0100-00001595-RA	Probable xyloglucan endotransglucosylase/hydrolase protein 26 [Source:SWISS;Acc:Q9SVV2]	9	0	0	0	0	0	0	0	0	0
1863	TBIM001863	Bsv0100-00001596-RA	Probable xyloglucan endotransglucosylase/hydrolase protein 26 [Source:SWISS;Acc:Q9SVV2]	9	0	0	0	0	0	0	0	0	0
1864	TBIM001864	Bsv0100-00001597-RA	-	9	0	0	1.29495	0	0.624627	2.24252	5.59018	2.91225	1.88026
1865	TBIM001865	Bsv0100-00001598-RA	-	9	0	0	0	0	0	0	0	0	0
1866	TBIM001866	Bsv0100-00001599-RA	-	9	0	0	0	0	0	0	0	0	0
1867	TBIM001867	Bsv0100-00001600-RA	Thaumatin-like protein [Source:SWISS;Acc:P50699]	9	43.0282	42.8145	77.7689	29.0571	30.2236	42.6949	5.32041	8.97265	6.63969
1868	TBIM001868	Bsv0100-00001601-RA	-	9	0	0	0	0	0	0	0	0	0
1869	TBIM001869	Bsv0100-00001602-RA	-	9	0	0	0	0	0	0	0	0	0
1870	TBIM001870	Bsv0100-00001603-RA	Photosystem I reaction center subunit III, chloroplastic [Source:SWISS;Acc:P12355]	9	2107.24	2240.61	1747.67	2974.87	2859.21	3268.76	5974.64	4426.2	3641.67
1871	TBIM001871	Bsv0100-00001604-RA	-	9	0	0	0	0	0.422296	0	0	0	0
1872	TBIM001872	Bsv0100-00001605-RA	-	9	0	0	0	0	0	0	0	0	0
1873	TBIM001873	Bsv0100-00001606-RA	-	9	0.275458	0.642779	0.769664	0.326892	0.592905	0.184482	0.292705	0	0.267926
1874	TBIM001874	Bsv0100-00001607-RA	Endo-1,4-beta-xylanase A [Source:SWISS;Acc:P26514]	9	1.91427	1.65353	1.98886	2.01356	1.81423	1.79698	0.299913	0.176548	0.390633
1875	TBIM001875	Bsv0100-00001608-RA	-	9	6.8995	6.41849	7.38249	4.20644	4.77852	3.87687	0.996321	0.629272	0.743457
1876	TBIM001876	Bsv0100-00001609-RA	-	9	0	0	0	0	0	0	0	0	0
1877	TBIM001877	Bsv0100-00001610-RA	-	9	0	0	0	0	0	0	0	0	0
1878	TBIM001878	Bsv0100-00001611-RA	-	9	0	0	0	0	0	0	0	0	0
1879	TBIM001879	Bsv0100-00001612-RA	Nucleolar protein 6 [Source:SWISS;Acc:Q5M7P5]	9	0	0	0	0	0	0	0	0	0
1880	TBIM001880	Bsv0100-00001613-RA	None [Source:SWISS;Acc:O49605]	9	46.8111	49.5598	53.7074	40.0603	41.8123	40.7438	26.3463	27.8194	24.4341
1881	TBIM001881	Bsv0100-00001614-RA	Rhodanese-like domain-containing protein 19, mitochondrial [Source:SWISS;Acc:Q8RUD6]	9	16.6119	16.0343	10.6635	7.43036	8.99687	2.82016	1.35979	0.807615	0.663585
1882	TBIM001882	Bsv0100-00001615-RA	Protein HEADING DATE 3A [Source:SWISS;Acc:Q93WI9]	9	0	0	0	0	0	0	0	0	0
1883	TBIM001883	Bsv0100-00001616-RA	-	9	26.3191	29.287	25.1059	34.9778	37.0835	26.0324	20.5043	22.2094	26.6362
1884	TBIM001884	Bsv0100-00001617-RA	-	9	0.741201	0.540982	0.926379	0.107695	1.12089	0.721618	0.0998643	0.759826	1.58242
1885	TBIM001885	Bsv0100-00001618-RA	CTL-like protein DDB_G0288717 [Source:SWISS;Acc:Q54IJ2]	9	22.8734	22.6342	17.9828	23.8091	20.2634	16.9407	16.6914	16.4232	14.486
1886	TBIM001886	Bsv0100-00001619-RA	-	9	0	1.20079	0	0	0	0	0	0	0
1887	TBIM001887	Bsv0100-00001487-RA	Phosphatidylinositol 4-phosphate 5-kinase 2 [Source:SWISS;Acc:Q8L796]	9	0	0	0	0	0	0	0	0	0
1888	TBIM001888	Bsv0100-00001488-RA	Organic cation/carnitine transporter 7 [Source:SWISS;Acc:Q940M4]	9	83.5457	84.9292	105.754	92.7238	86.3067	89.8275	73.6254	81.2655	72.1627
1889	TBIM001889	Bsv0100-00001489-RA	-	9	0	0	0	0	0	0	0	0	0
1890	TBIM001890	Bsv0100-00001490-RA	3-phosphoinositide-dependent protein kinase 2 [Source:SWISS;Acc:Q4V3C8]	9	27.4467	27.4556	28.1537	24.1646	23.9741	25.6309	14.7739	18.1715	17.8423
1891	TBIM001891	Bsv0100-00001491-RA	-	9	0	0	0	0	0	0	0	0	0
1892	TBIM001892	Bsv0100-00001492-RA	-	9	679.491	424.658	914.984	455.822	750.252	866.705	364.299	671.745	1424.14
1893	TBIM001893	Bsv0100-00001493-RA	Aminoacylase-1 [Source:SWISS;Acc:P37111]	9	1.55111	1.14773	1.39227	0.980795	0.559729	2.04852	0.531973	3.23721	1.5478
1894	TBIM001894	Bsv0100-00001494-RA	None [Source:SWISS;Acc:Q9SW48]	9	0	0	0	0	0	0	0	0	0
1895	TBIM001895	Bsv0100-00001495-RA	DNA topoisomerase 3-alpha [Source:SWISS;Acc:Q9NG98]	9	0	0	0	0	0	0	0	0	0
1896	TBIM001896	Bsv0100-00001496-RA	-	9	0	0	0	0	0	0	0	0	0
1897	TBIM001897	Bsv0100-00001497-RA	-	9	0	0	0	0	0	0	0	0	0
1898	TBIM001898	Bsv0100-00001498-RA	-	9	26.0872	25.805	19.7	20.183	21.0914	14.0087	13.8818	11.2841	9.37155
1899	TBIM001899	Bsv0100-00001499-RA	-	9	17.247	13.7884	18.118	13.4037	15.2334	13.3306	9.10523	8.38713	8.09915
1900	TBIM001900	Bsv0100-00001500-RA	-	9	0	0	0	0	0	0	0	0	0
1901	TBIM001901	Bsv0100-00001501-RA	ATP synthase subunit a [Source:SWISS;Acc:P05499]	9	0	0	0	0	0	0	0	0	0
1902	TBIM001902	Bsv0100-00001502-RA	-	9	0	0	0	0	0	0	0	0	0
1903	TBIM001903	Bsv0100-00001503-RA	-	9	0	0	0	0	0	0	0	0	0
1904	TBIM001904	Bsv0100-00001504-RA	-	9	0	0	0	0	0	0	0	0	0
1905	TBIM001905	Bsv0100-00001505-RA	Uncharacterized protein C4orf21 homolog [Source:SWISS;Acc:Q0VGT4]	9	0	0	0	0	0	0	0	0	0
1906	TBIM001906	Bsv0100-00001906-RA	Mitochondrial substrate carrier family protein B [Source:SWISS;Acc:Q54MZ4]	9	11.5972	10.4648	16.2194	8.44229	8.35755	10.1366	4.36506	4.0739	4.32764
1907	TBIM001907	Bsv0100-00001907-RA	-	9	0	0	0	0	0	0	0	0	0
1908	TBIM001908	Bsv0100-00001908-RA	-	9	34.1933	32.361	22.8125	35.1229	36.0741	25.1519	32.7044	41.4933	35.4855
1909	TBIM001909	Bsv0100-00001909-RA	-	9	61.6036	57.0813	67.4557	47.4619	52.8491	63.1407	26.535	59.2811	25.5438
1910	TBIM001910	Bsv0100-00001910-RA	-	9	4.253	3.30258	3.40821	1.98169	2.86359	3.38159	2.34964	2.28517	3.88522
1911	TBIM001911	Bsv0100-00001911-RA	L-ascorbate peroxidase 2, cytosolic [Source:SWISS;Acc:Q1PER6]	9	0	0.121705	0	0.218721	0	0.0844403	0	0	0
1912	TBIM001912	Bsv0100-00001912-RA	-	9	0	0	0	0	0	0	0	0	0
1913	TBIM001913	Bsv0100-00001913-RA	None [Source:SWISS;Acc:Q8RWU3]	9	8.69662	9.30462	16.9907	9.1709	9.93099	17.2553	8.15761	33.1351	26.1651
1914	TBIM001914	Bsv0100-00001914-RA	Floral homeotic protein APETALA 2 [Source:SWISS;Acc:P47927]	9	5.02251	5.75158	8.40425	4.0184	3.67304	3.04034	0.791323	1.10361	1.12978
1915	TBIM001915	Bsv0100-00001973-RA	-	9	104.532	110.049	109.331	119.002	120.481	147.42	122.044	134.667	130.734
1916	TBIM001916	Bsv0100-00001974-RA	-	9	4.17887	1.94224	2.5448	2.29847	0.62654	2.30606	0.303889	1.48817	1.04797
1917	TBIM001917	Bsv0100-00001975-RA	-	9	0.775136	1.13188	0.44987	0.46344	2.82771	1.25828	0.642151	0.592177	0.353107
1918	TBIM001918	Bsv0100-00001976-RA	None [Source:SWISS;Acc:Q949Y5]	9	101.493	110.737	107.514	130.743	125.18	148.86	157.911	151.545	133.468
1919	TBIM001919	Bsv0100-00001977-RA	None [Source:SWISS;Acc:Q5BPL5]	9	7.85069	9.19323	11.3532	7.87726	8.24338	7.4507	7.25006	7.00124	6.31973
1920	TBIM001920	Bsv0100-00001978-RA	60S ribosomal protein L7-2 [Source:SWISS;Acc:P60040]	9	309.339	308.264	359.591	271.357	273.007	337.964	142.168	184.549	165.747
1921	TBIM001921	Bsv0100-00001979-RA	Protein FAR1-RELATED SEQUENCE 2 [Source:SWISS;Acc:Q3EBQ3]	9	0	0	0	0	0	0	0	0	0
1922	TBIM001922	Bsv0100-00001980-RA	-	9	0.0861158	0	0.0316007	0.0319652	0.151138	0	0.0569307	0.055488	0.109066
1923	TBIM001923	Bsv0100-00001981-RA	-	9	0	0	0	0	0	0	0	0	0
1924	TBIM001924	Bsv0100-00001982-RA	Polyadenylate-binding protein 2 [Source:SWISS;Acc:P42731]	9	0	0.170679	0	0	0	0	0	0	0
1925	TBIM001925	Bsv0100-00001983-RA	Cell division control protein 48 homolog C [Source:SWISS;Acc:Q9SS94]	9	16.643	14.7572	16.2395	11.1516	14.6327	13.3318	7.26574	7.98146	9.75837
1926	TBIM001926	Bsv0100-00001984-RA	Putative ribonuclease H protein At1g65750 [Source:SWISS;Acc:P0C2F6]	9	0	0	0	0	0	0	0	0	0
1927	TBIM001927	Bsv0100-00001985-RA	-	9	0	0	0	0	0	0	0	0	0
1928	TBIM001928	Bsv0100-00001986-RA	ADP-ribosylation factor GTPase-activating protein AGD12 [Source:SWISS;Acc:Q9FVJ3]	9	0	0	0	0	0	0	0	0	0
1929	TBIM001929	Bsv0100-00001987-RA	Transmembrane protein 214-A [Source:SWISS;Acc:A0JMW6]	9	78.3738	78.9423	80.2649	78.0219	68.028	64.0109	45.5822	47.8385	41.6083
1930	TBIM001930	Bsv0100-00001988-RA	-	9	0	0	0	0	0	0	0	0	0
1931	TBIM001931	Bsv0100-00001989-RA	SPX domain-containing protein 3 [Source:SWISS;Acc:Q5PP62]	9	0.265728	0.13024	0.550511	0.470169	0.44851	0.0881413	0	0	0
1932	TBIM001932	Bsv0100-00001990-RA	DNA polymerase sigma [Source:SWISS;Acc:Q5XG87]	9	8.7896	7.99957	9.62002	5.74054	7.73018	5.63623	2.84931	2.70038	3.40338
1933	TBIM001933	Bsv0100-00001991-RA	Putative Holliday junction resolvase [Source:SWISS;Acc:Q2IQC1]	9	16.9625	16.9009	16.2217	17.1419	18.268	21.4358	14.3135	16.5416	15.1884
1934	TBIM001934	Bsv0100-00001992-RA	-	9	30.2827	31.9187	32.9241	26.8624	24.2545	24.9313	18.5313	21.0614	19.496
1935	TBIM001935	Bsv0100-00001993-RA	None [Source:SWISS;Acc:Q9FGK8]	9	16.8978	16.2677	18.0749	15.9769	19.3348	16.3708	8.96173	9.51094	10.7204
1936	TBIM001936	Bsv0100-00001994-RA	Zinc finger protein ZAT9 [Source:SWISS;Acc:Q9M202]	9	3.04781	1.92571	3.1158	1.83899	2.12307	2.66335	0.696608	1.84383	3.8283
1937	TBIM001937	Bsv0100-00001995-RA	Zinc finger protein ZAT3 [Source:SWISS;Acc:O65499]	9	0	0	0	0	0	0	0	0	0
1938	TBIM001938	Bsv0100-00001996-RA	Putative expansin-B2 [Source:SWISS;Acc:Q9SHY6]	9	0.224012	0.214987	0	0	0	0	0	0.074718	0.127223
1939	TBIM001939	Bsv0100-00001997-RA	tRNA (adenine(58)-N(1))-methyltransferase catalytic subunit TRMT61A [Source:SWISS;Acc:Q6AY46]	9	0	0	0	0	0	0	0	0	0
1940	TBIM001940	Bsv0100-00001998-RA	Cyclin-U2-1 [Source:SWISS;Acc:Q9SHD3]	9	5.40374	4.41092	2.07048	3.29835	3.25877	0.313921	0.251434	0.154371	0.135021
1941	TBIM001941	Bsv0100-00001999-RA	Transcription factor UNE10 [Source:SWISS;Acc:Q8GZ38]	9	1.42419	1.32402	1.22309	3.85266	2.90829	3.36101	8.03663	10.5701	9.81246
1942	TBIM001942	Bsv0100-00002000-RA	F-box protein At5g07670 [Source:SWISS;Acc:Q8VYT5]	9	24.6958	21.8091	20.6807	18.2017	20.328	18.7884	10.0483	10.4317	11.5926
1943	TBIM001943	Bsv0100-00002001-RA	Protein transport protein Sec61 subunit beta [Source:SWISS;Acc:P38389]	9	139.262	144.095	134.46	108.368	127.61	107.71	85.9134	87.2761	66.5
1944	TBIM001944	Bsv0100-00002002-RA	-	9	0.235677	0.154191	0.46791	0.465088	0.134213	0.258669	0.129153	0.118139	0.284083
1945	TBIM001945	Bsv0100-00002003-RA	CCR4-NOT transcription complex subunit 1 [Source:SWISS;Acc:Q6ZQ08]	9	31.3666	28.036	35.0384	27.9593	28.171	24.5102	16.8197	16.0277	16.3685
1946	TBIM001946	Bsv0100-00002004-RA	Probable plastid-lipid-associated protein 11 [Source:SWISS;Acc:O81304]	9	33.1307	30.3744	31.3941	43.1429	36.1143	46.5865	67.4119	72.575	77.44
1947	TBIM001947	Bsv0100-00002005-RA	-	9	7.25809	8.81761	11.6769	5.49909	6.53007	7.79159	2.8059	13.4111	16.2036
1948	TBIM001948	Bsv0100-00002006-RA	Metalloendoproteinase 1 [Source:SWISS;Acc:P29136]	9	0.425053	0.117417	0.347583	0.139193	0.331937	0.392939	0.0644888	0.240244	0.439782
1949	TBIM001949	Bsv0100-00002007-RA	Squamosa promoter-binding-like protein 8 [Source:SWISS;Acc:Q8GXL3]	9	105.516	115.021	125.772	56.5843	55.0891	36.0615	0.644309	1.69381	2.17359
1950	TBIM001950	Bsv0100-00002008-RA	Malate dehydrogenase, cytoplasmic [Source:SWISS;Acc:Q08062]	9	4.00812	3.16308	5.04525	2.14247	1.98439	2.06035	0.467003	0.6579	0.772728
1951	TBIM001951	Bsv0100-00002009-RA	3-hydroxyisobutyryl-CoA hydrolase-like protein 1, mitochondrial [Source:SWISS;Acc:Q5XF59]	9	14.1797	12.0828	11.2785	9.70694	10.1619	9.93691	7.15669	6.77816	7.22878
1952	TBIM001952	Bsv0100-00002010-RA	Cell number regulator 6 [Source:SWISS;Acc:B6SGC5]	9	0	0	0	0	0	0	0	0	0
1953	TBIM001953	Bsv0100-00002011-RA	Serine carboxypeptidase-like 13 [Source:SWISS;Acc:Q8H780]	9	25.3631	23.3215	21.7404	27.363	25.3515	27.5709	25.4408	30.6324	26.7979
1954	TBIM001954	Bsv0100-00002012-RA	-	9	0	0	0	0	0	0	0	0	0
1955	TBIM001955	Bsv0100-00002013-RA	Retrovirus-related Pol polyprotein from transposon TNT 1-94 [Source:SWISS;Acc:P10978]	9	0	0	0	0	0.0503258	0	0	0	0
1956	TBIM001956	Bsv0100-00002014-RA	-	9	0	0	0	0	0	0	0	0	0
1957	TBIM001957	Bsv0100-00002015-RA	-	9	0	0	0	0	0	0	0	0	0
1958	TBIM001958	Bsv0100-00002016-RA	Serine carboxypeptidase-like 17 [Source:SWISS;Acc:Q9C7D6]	9	13.4584	13.7619	13.4583	9.59271	7.70231	4.6736	1.11592	0.996155	1.18347
1959	TBIM001959	Bsv0100-00002017-RA	Serine carboxypeptidase-like 18 [Source:SWISS;Acc:Q9C7Z9]	9	55.762	49.7694	48.8909	52.1745	51.9682	38.3288	14.2761	13.6428	14.8551
1960	TBIM001960	Bsv0100-00002018-RA	-	9	0	0.225118	0.090218	0.0939468	0.348725	0.106349	0.0855117	0	0
1961	TBIM001961	Bsv0100-00002019-RA	Retrovirus-related Pol polyprotein from transposon TNT 1-94 [Source:SWISS;Acc:P10978]	9	0	0	0	0	0	0	0	0	0
1962	TBIM001962	Bsv0100-00002020-RA	Serine carboxypeptidase-like 18 [Source:SWISS;Acc:Q9C7Z9]	9	4.98601	4.79761	3.46207	3.34683	2.40421	2.14349	0.481309	0.443099	0.780381
1963	TBIM001963	Bsv0100-00002021-RA	-	9	6.58176	6.80946	8.03366	12.1384	10.7142	15.6265	17.7425	18.2072	17.8392
1964	TBIM001964	Bsv0100-00002022-RA	None [Source:SWISS;Acc:Q8L7F7]	9	15.1526	15.9677	19.4145	14.7047	11.7939	11.4277	9.48451	7.27806	8.80698
1965	TBIM001965	Bsv0100-00002023-RA	-	9	0	0	0	0	0	0	0	0	0
1966	TBIM001966	Bsv0100-00002024-RA	Protein FAR1-RELATED SEQUENCE 11 [Source:SWISS;Acc:Q9SY66]	9	0	0.0631331	0.0759309	0.0379948	0	0	0	0	0
1967	TBIM001967	Bsv0100-00002025-RA	-	9	0.540415	0.23152	0	0.0688171	0.0657688	0.0795948	0	0	0
1968	TBIM001968	Bsv0100-00002026-RA	Carotenoid cleavage dioxygenase 7, chloroplastic [Source:SWISS;Acc:Q7XJM2]	9	0	0	0	0	0	0	0	0	0
1969	TBIM001969	Bsv0100-00002027-RA	Carotenoid cleavage dioxygenase 7, chloroplastic [Source:SWISS;Acc:Q7XJM2]	9	0	0	0	0	0	0	0	0	0
1970	TBIM001970	Bsv0100-00002028-RA	Chalcone synthase [Source:SWISS;Acc:P51075]	9	1.89842	1.65655	2.90337	1.07779	0.892415	0.656119	0.302298	0.342141	0.474984
1971	TBIM001971	Bsv0100-00002029-RA	-	9	24.574	24.7787	25.2312	23.1565	21.7956	22.0555	23.0855	16.8741	14.178
1972	TBIM001972	Bsv0100-00002030-RA	-	9	0	0	0	0	0	0	0	0	0
1973	TBIM001973	Bsv0100-00002031-RA	E3 ubiquitin-protein ligase BRE1-like 1 [Source:SWISS;Acc:Q8RXD6]	9	23.7513	22.5297	23.8467	20.2213	20.4365	17.3264	12.2368	13.3381	14.2317
1974	TBIM001974	Bsv0100-00002032-RA	-	9	14.63	13.0468	11.7578	13.2673	11.6301	10.112	7.9769	7.36099	5.71073
1975	TBIM001975	Bsv0100-00002033-RA	Ethylene-responsive transcription factor ERF034 [Source:SWISS;Acc:Q8LBQ7]	9	13.574	14.8282	10.3917	16.4453	18.6461	8.63032	19.2266	9.25477	8.06553
1976	TBIM001976	Bsv0100-00001915-RA	-	9	60.488	63.9487	87.0294	53.1996	52.8669	45.9724	27.3598	28.8662	24.4613
1977	TBIM001977	Bsv0100-00001916-RA	G2/mitotic-specific cyclin-1 [Source:SWISS;Acc:P34800]	9	16.0501	15.7714	19.4111	11.0472	9.02758	7.91822	2.20019	3.81277	4.92192
1978	TBIM001978	Bsv0100-00001917-RA	Calmodulin-interacting protein 111 [Source:SWISS;Acc:Q9LET7]	9	1.28736	0.964766	1.12957	1.12169	1.05195	0.977446	3.20566	2.57893	2.28145
1979	TBIM001979	Bsv0100-00001918-RA	Transcription factor LUX [Source:SWISS;Acc:Q9SNB4]	9	0	0	0	0	0	0	0	0	0
1980	TBIM001980	Bsv0100-00001919-RA	R3H domain-containing protein 2 [Source:SWISS;Acc:A0JNC2]	9	44.7336	45.116	31.9205	39.7337	41.5127	25.7006	28.9427	19.0522	19.3072
1981	TBIM001981	Bsv0100-00001920-RA	-	9	0	0	0	0	0	0	0	0	0
1982	TBIM001982	Bsv0100-00001921-RA	Exocyst complex component SEC15A [Source:SWISS;Acc:Q9LXX6]	9	3.90407	3.09418	2.64977	2.07593	2.28957	1.82051	1.35775	1.77196	1.2034
1983	TBIM001983	Bsv0100-00001922-RA	Probable nitrite transporter At1g68570 [Source:SWISS;Acc:Q9SX20]	9	19.9576	20.4253	17.8129	22.6161	23.0885	19.139	32.5432	41.0559	35.7677
1984	TBIM001984	Bsv0100-00001923-RA	Probable nitrite transporter At1g68570 [Source:SWISS;Acc:Q9SX20]	9	1.83118	2.77046	2.36316	3.00114	2.80552	4.02739	2.0491	5.3729	5.40978
1985	TBIM001985	Bsv0100-00001924-RA	Probable nitrite transporter At1g68570 [Source:SWISS;Acc:Q9SX20]	9	10.9006	12.3546	13.6556	14.7896	14.0619	15.7606	13.0353	22.258	18.5273
1986	TBIM001986	Bsv0100-00001925-RA	None [Source:SWISS;Acc:F8WKW1]	9	0	0.0446943	0	0	0	0.0617011	0	0.136318	0.156043
1987	TBIM001987	Bsv0100-00001926-RA	-	9	0	0	0	0	0	0	0	0	0
1988	TBIM001988	Bsv0100-00001927-RA	None [Source:SWISS;Acc:F8WKW1]	9	0	0	0	0.0835529	0	0	0	0	0
1989	TBIM001989	Bsv0100-00001928-RA	None [Source:SWISS;Acc:F8WKW1]	9	3.28832	3.2115	5.74174	6.23428	5.49681	6.45034	3.28385	6.31931	4.43314
1990	TBIM001990	Bsv0100-00001929-RA	-	9	0	0	0	0	0	0	0	0	0
1991	TBIM001991	Bsv0100-00001930-RA	-	9	0	0	0	0	0	0	0	0	0
1992	TBIM001992	Bsv0100-00001931-RA	Cytochrome P450 94A1 [Source:SWISS;Acc:O81117]	9	5.95644	4.79368	7.29925	6.75604	7.50327	11.4754	7.90697	17.1539	17.1013
1993	TBIM001993	Bsv0100-00001932-RA	Cytosolic Fe-S cluster assembly factor NARFL [Source:SWISS;Acc:Q7TMW6]	9	15.8391	15.6231	17.3253	13.5381	12.2742	12.8035	9.65275	10.7058	8.12403
1994	TBIM001994	Bsv0100-00001933-RA	Pentatricopeptide repeat-containing protein At1g09220, mitochondrial [Source:SWISS;Acc:Q680Z7]	9	0.867027	1.08624	0.136084	0.523362	0.886307	0.545442	0.849104	0.115641	0.206769
1995	TBIM001995	Bsv0100-00001934-RA	WAT1-related protein At5g07050 [Source:SWISS;Acc:Q9FL41]	9	1.95078	2.63675	2.7248	0.454712	0.118447	0.377687	7.07335	3.40348	3.16945
1996	TBIM001996	Bsv0100-00001935-RA	-	9	0	0	0	0	0	0	0	0	0
1997	TBIM001997	Bsv0100-00001936-RA	-	9	0	0	0	0	0	0	0	0	0
1998	TBIM001998	Bsv0100-00001937-RA	Peptidyl-prolyl cis-trans isomerase FKBP65 [Source:SWISS;Acc:Q9FJL3]	9	33.6145	29.3129	39.4392	55.9584	50.488	95.9951	121.931	154.53	151.661
1999	TBIM001999	Bsv0100-00001938-RA	-	9	0.189843	0	0.225854	0.226997	0	0.250119	0	0.571478	0.711321
[truncated: 53,258 more rows]
