# Supplementary material
Source: Research Square preprint supplement (doi:10.21203/rs.3.rs-8983924/v1)
Supplement: Supplementary file 2 [file 32cfa188fc53ff1fc9d6dfe3.xlsx]

## Sheet: 81 DEG genes
No	Genes	Binertia DB	Name	Description	Val_1	Val_2	Avr. FPKM	q-PCR Ratio (Early/mature)	At_gene	C4_ready_modules
1	Bsv0100-00000031	KAL2932951.1	GLIP4	GDSL esterase/lipase 4	0.74	0	0.345	2.42489	At5g03610	Phenylpropanoid_lignin_lipid_cuticle
10	Bsv0100-00003862	KAL2894296.1	F14O23.4	GDSL esterase/lipase At1g71691	5.75	0	2.726	17.5066	AT1G71691	Phenylpropanoid_lignin_lipid_cuticle
11	Bsv0100-00003864	KAL2894298.1	GDL17_ARATH	GDSL esterase/lipase At1g33811	4.53	0	4.078	FAIL	AT1G33811	Phenylpropanoid_lignin_lipid_cuticle
13	Bsv0100-00004814	KAL2920655.1	COMT	Caffeic acid 3-O-methyltransferase	1.68	0	1.001	34.9338	AT5G54160	Phenylpropanoid_lignin_lipid_cuticle
36	Bsv0100-00012052	KAL2921126.1	dl4155w	GDSL esterase/lipase At4g16230	21.84	0	19.62	undetected in mautre	AT4G16230	Phenylpropanoid_lignin_lipid_cuticle
38	Bsv0100-00013033	KAL2904229.1	WSD1	O-acyltransferase WSD1	16.96	0	13.855	31968	AT5G53380	Phenylpropanoid_lignin_lipid_cuticle
51	Bsv0100-00017455	KAL2940599.1	CPRD49	GDSL esterase/lipase CPRD49	1.13	0	0.72	4.53695	AT3G11210	Phenylpropanoid_lignin_lipid_cuticle
58	Bsv0100-00020061	KAL2933319.1	At5g03820	GDSL esterase/lipase At5g03820	8.95	0	4.727	undetected in mautre	AT5G03820	Phenylpropanoid_lignin_lipid_cuticle
59	Bsv0100-00018247	KAL2939371.1	WSD1	O-acyltransferase WSD1	0.88	0	1.186	85.2668	AT5G22490	Phenylpropanoid_lignin_lipid_cuticle
64	Bsv0100-00020019	KAL2930249.1	FAR_SIMCH	Alcohol-forming fatty acyl-CoA reductase	11.36	0	6.872	undetected in mautre	AT4G33790	Phenylpropanoid_lignin_lipid_cuticle
65	Bsv0100-00020020	KAL2930248.1	FAR3	Alcohol-forming fatty acyl-CoA reductase	4.12	0	2.457	986.415	AT4g33790	Phenylpropanoid_lignin_lipid_cuticle
83	Bsv0100-00026876	KAL2939385.1	WSD1	O-acyltransferase WSD1	1.4	0	0.842	undetected in mautre	At5g53390	Phenylpropanoid_lignin_lipid_cuticle
92	Bsv0100-00028292	B_sinuspersici unique	AIR1	Putative lipid-binding protein AIR1	86.11	0	71.976	2221.66	At4g12520	Phenylpropanoid_lignin_lipid_cuticle
114	Bsv0100-00038953	KAL2893440.1	COMT	Caffeic acid 3-O-methyltransferase	0.73	0	0.511	13.0807	AT5G54160	Phenylpropanoid_lignin_lipid_cuticle
117	Bsv0100-00034628	KAL2901693.1	EARLI1	Lipid transfer protein EARLI 1	6.81	0	2.251	undetected in mautre	AT1G62510	Phenylpropanoid_lignin_lipid_cuticle
118	Bsv0100-00034629	KAL2901692.1	EARLI1	Lipid transfer protein EARLI 1	5.81	0	1.656	1124.64	AT1G62510	Phenylpropanoid_lignin_lipid_cuticle
119	Bsv0100-00036018	KAL2939399.1	WSD1	O-acyltransferase WSD1	5.57	0	3.435	undetected in mautre	At5g53390	Phenylpropanoid_lignin_lipid_cuticle
125	Bsv0100-00037607	KAL2896684.1	SCPL17	Serine carboxypeptidase-like 17	1.66	0	1.695	7.00761	At2g22970	Phenylpropanoid_lignin_lipid_cuticle
126	Bsv0100-00038184	KAL2929980.1	CCoAOMT	Caffeoyl-CoA O-methyltransferase	2.55	0	1.343	undetected in mautre	At4g26220	Phenylpropanoid_lignin_lipid_cuticle
127	Bsv0100-00038185	KAL2929980.1	CCoAOMT	Caffeoyl-CoA O-methyltransferase	6.08	0	4.113	9.95858	At1g67990	Phenylpropanoid_lignin_lipid_cuticle
129	Bsv0100-00040458	KAL2939381.1	WSD1	O-acyltransferaseWSD1	1.96	0	1.253	undetected in mautre	At5g53390	Phenylpropanoid_lignin_lipid_cuticle
131	Bsv0100-00042397	KAL2893679.1	GDL14_ARATH	GDSL esterase/lipase, At1g29670	0.62	0	0.392	undetected in mautre	AT1G29660	Phenylpropanoid_lignin_lipid_cuticle
142	Bsv0100-00047155	KAL2939397.1	WSD1	O-acyltransferase WSD1	7.66	0	4.074	undetected in mautre	At1g72110	Phenylpropanoid_lignin_lipid_cuticle
144	Bsv0100-00048321	KAL2931243.1	GDL71_ARATH	GDSL esterase/lipase At5g03610	1.32	0	0.729	30.3711	AT5G03610	Phenylpropanoid_lignin_lipid_cuticle
149	Bsv0100-00049137	KAL2901682.1	EARLI1	Lipid transfer protein EARLI 1	5.8	0	1.953	37.3586	AT2G45180	Phenylpropanoid_lignin_lipid_cuticle
150	Bsv0100-00050453	KAL2893679.1	GDL28_ARATH	GDSL esterase/lipase, At1g71250	2.41	0	1.605	131.796	AT1G71250	Phenylpropanoid_lignin_lipid_cuticle
177	Bsv0100-00006302	KAL2895407.1	GDL56_ARATH	GDSL esterase/lipase At3g43570	7.82	0	12.59	9.13471	At5g42170	Phenylpropanoid_lignin_lipid_cuticle
132	Bsv0100-00043939	KAL2924721.1	OMT1	Caffeic acid 3-O-methyltransferase	0.69	0	0.427	10.9135	AT5G54160	Phenylpropanoid_lignin_lipid_cuticle;Metabolite_transport
6	Bsv0100-00001955	XM_010673125.4	At4g27810	hypothetical protein	4.16	0	3.876	249.375	At4g27810	Chloroplast_biogenesis_import
30	Bsv0100-00010562	KAL2936096.1	rps4	30S ribosomal protein S4, chloroplastic	0.73	0	0.628	12.6788		Chloroplast_biogenesis_import
32	Bsv0100-00010483	KAL2897115.1	GAPCP1	Glyceraldehyde-3-phosphate dehydrogenase GAPCP1, chloroplastic	2.5	0	1.717	FAIL	AT1G79530	Chloroplast_biogenesis_import
49	Bsv0100-00017092	KAL2895558.1	rplB	50S ribosomal protein L2	0.69	0	0.296	undetected in mautre		Chloroplast_biogenesis_import
74	Bsv0100-00022164	KAL2931567.1	rpsG	30S ribosomal protein S7	33.06	0	16.882	undetected in mautre	At1g68260	Chloroplast_biogenesis_import
91	Bsv0100-00028903	KAL2906926.1	cob	Cytochrome b	4.76	0	4.172	undetected in mautre		Chloroplast_biogenesis_import
93	Bsv0100-00028623	B_sinuspersici unique	ccsA	Cytochrome c biogenesis protein CcsA	0.83	0	0.678	58.1346	AT4G16050	Chloroplast_biogenesis_import
121	Bsv0100-00037816	B_sinuspersici unique	PCDH11X	Protocadherin-11 X-linked	0.94	0	0.63	undetected in mautre	AT3G14760	Chloroplast_biogenesis_import
122	Bsv0100-00036723	KAL2929755.1	PAP26	Bifunctional purple acid phosphatase 26	2.49	0	1.124	undetected in mautre	AT5G34850	Chloroplast_biogenesis_import
138	Bsv0100-00045370	KAL2925650.1	HSP17.9-D	HSP17.9-D 17.9 kDa class II heat shock protein	0.92	0	0.391	14.7462	AT5G12020	Chloroplast_biogenesis_import
181	Bsv0100-00028632	B_sinuspersici unique	M810_ARATH	Uncharacterized mitochondrial protein AtMg00810	1.24	0	0.713	4.66926	AT5G16860	Chloroplast_biogenesis_import
57	Bsv0100-00018748	KAL2940758.1	PSY2	Phytoene synthase 2, chloroplastic	3.03	0	2.028	21.7296	AT5G17230	Chloroplast_biogenesis_import;Isoprenoid_mep_carotenoid
155	Bsv0100-00050947	KAL2926425.1	Os07g0190000	Probable 1-deoxy-D-xylulose-5-phosphate synthase 2, chloroplastic	2.2	0	1.427	1656.26	AT4G15560	Chloroplast_biogenesis_import;Isoprenoid_mep_carotenoid
128	Bsv0100-00040026	KAL2939890.1	dxs	1-deoxy-D-xylulose-5-phosphate synthase	0.74	0	0.798	14.6617		Isoprenoid_mep_carotenoid
99	Bsv0100-00030682	KAL2927347.1	NUDT20	Nudix hydrolase 20, chloroplastic	4.22	0	2.881	26.5888	At5g19460	Chloroplast_biogenesis_import;Redox_ros_energy
100	Bsv0100-00030683	KAL2929281.1	NUDT20	Nudix hydrolase 20, chloroplastic	6.51	0	5.444	33.9735	At5g19460	Chloroplast_biogenesis_import;Redox_ros_energy
139	Bsv0100-00047218	KAL2924190.1	CYP77A3	Cytochrome P450 77A3	0.75	0	0.224	FAIL	AT1G11600	Chloroplast_biogenesis_import;Redox_ros_energy
147	Bsv0100-00048651	KAL2931464.1	CYP77A3	Cytochrome P450 77A3	0.74	0	0.214	undetected in mautre	AT1G11600	Chloroplast_biogenesis_import;Redox_ros_energy
88	Bsv0100-00028023	KAL2904964.1	PER57	Peroxidase 57	0.75	0	0.63	undetected in mautre	AT5G17820	Redox_ros_energy
115	Bsv0100-00034165	KAL2903807.1	GRXC3	Glutaredoxin-C3	3.11	0	1.091	undetected in mautre	AT5G14070	Redox_ros_energy
195	Bsv0100-00045885	KAL2944568.1		NADH-ubiquinone oxidoreductase chain 5	9.1	0	6.993	2.76117		Redox_ros_energy
75	Bsv0100-00024425	KAL2906365.1	GH3.1	Probable indole-3-acetic acid-amido synthetase GH3.1	14.63	0	9.934	695.424	At2g23170	Chloroplast_biogenesis_import;Auxin_homeostasis
76	Bsv0100-00024426	KAL2906362.1	GH3.2	Indole-3-acetic acid-amido synthetase GH3.2	15.89	0	9.666	83.5102	At5g54510	Chloroplast_biogenesis_import;Auxin_homeostasis
7	Bsv0100-00002448	KAL2921394.1	WTR8_ARATH	WAT1-related protein At1g44800	1.76	0	0.788	0.458294	AT1G44800	Auxin_homeostasis
2	Bsv0100-00000361	KAL2895234.1	NAC031	Protein CUP-SHAPED COTYLEDON 3	2.19	0	1.01	undetected in mautre	AT1G76420	Transcriptional_control
5	Bsv0100-00001675	KAL2920939.1	REM9	B3 domain-containing protein REM9	0.72	0	0.492	168.799	At5g25470	Transcriptional_control
90	Bsv0100-00028441	KAL2905739.1	VRN1	B3 domain-containing transcription factor VRN1	0.98	0	0.485	undetected in mautre	AT3G18960	Transcriptional_control
17	Bsv0100-00006112	KAL2920644.1	MYB3	Transcription factor MYB3	0.82	0	0.314	4.53844	AT3G61250	Transcriptional_control
26	Bsv0100-00010677	KAL2922233.1	MYB108	Transcription factor MYB108	0.66	0	0.434	9.26829	At5g49620	Transcriptional_control
27	Bsv0100-00010905	KAL2943538.1	NAC021	NAC domain-containing protein 21/22	5.17	0	2.716	374.971	AT1G56010	Transcriptional_control
28	Bsv0100-00010906	KAL2943539.1	NAC021	NAC domain-containing protein 21/22	6.57	0	4.998	602.066	AT1G56010	Transcriptional_control
31	Bsv0100-00010800	KAL2892531.1	HAT3	Homeobox-leucine zipper protein HAT3	2.34	0	1.268	undetected in mautre	AT2G44910	Transcriptional_control
45	Bsv0100-00014437	KAL2931714.1	WOX9	WUSCHEL-related homeobox 9	1.17	0	0.583	undetected in mautre	AT2G33880	Transcriptional_control
69	Bsv0100-00021511	KAL2904975.1	TCP12	Transcription factor TCP12	6.59	0	3.252	15.2949	At1g68800	Transcriptional_control
79	Bsv0100-00025089	KAL2931266.1	STM	H1 Homeobox protein SBH1	5.92	0	2.194	undetected in mautre	At1g62360	Transcriptional_control
107	Bsv0100-00031272	KAL2903301.1	KNAT2	Homeobox protein knotted-1-like 2	2.95	0	1.137	22.0524	AT5G25220	Transcriptional_control
109	Bsv0100-00032016	KAL2944387.1	NAC098	Protein CUP-SHAPED COTYLEDON 2	0.7	0	0.264	undetected in mautre	AT5G53950	Transcriptional_control
141	Bsv0100-00046713	KAL2906068.1	MYB39	TranscriptionfactorMYB39	2.64	0	1.857	undetected in mautre	AT5G10280	Transcriptional_control
152	Bsv0100-00050605	KAL2944369.1	NAC098	Protein CUP-SHAPED COTYLEDON 2	0.75	0	0.266	undetected in mautre	AT5G53950	Transcriptional_control
160	Bsv0100-00053610	KAL2906067.1	MYB39	Transcription factor MYB39	2.49	0	2.209	387.012	AT1G34670	Transcriptional_control
15	Bsv0100-00006562	KAL2901726.1	PME68	Probable pectinesterase 68	18.46	0	10.164	313.391	AT5G47500	Cell_wall_expansion
35	Bsv0100-00011959	XM_057393257.1	EPFL4	EPIDERMAL PATTERNING FACTOR-like protein 4	3.35	0	1.482	8.9511	AT4G14723	Cell_wall_expansion
40	Bsv0100-00013994	KAL2923367.1	PDCB3	PLASMODESMATA CALLOSE-BINDING PROTEIN 3	1.4	0	0.799	11.1623	AT4G13600	Cell_wall_expansion
42	Bsv0100-00014397	XM_057676545.1	EPFL2	EPIDERMAL PATTERNING FACTOR-like protein 2	1.8	0	1.299	57.2219	AT4G37810	Cell_wall_expansion
108	Bsv0100-00030285	KAL2903243.1	XTH33	Probable xyloglucan endotransglucosylase/hydrolase protein 33	3.92	0	3	21.355	AT1G10550	Cell_wall_expansion
157	Bsv0100-00051858	KAL2893917.1	CEL3	Endoglucanase 9	0.73	0	0.452	26.1216	At1g71380	Cell_wall_expansion
172	Bsv0100-00020760	XM_057676545.1	EPF1	EPIDERMAL PATTERNING FACTOR-like protein 1	3.46	0	2.935	11.83	AT2G20875	Cell_wall_expansion
174	Bsv0100-00025048	KAL2901688.1	14KD_DAUCA	14 kDa proline-rich protein DC2.15	0.84	0	0.453	21.5853	At4g12520	Cell_wall_expansion
24	Bsv0100-00009857	KAL2933059.1	yjiY	Inner membrane protein YjiY	1280.55	0	718.592	25825.9		Metabolite_transport
56	Bsv0100-00018111	KAL2944320.1	SWEET5	Bidirectional sugar transporter SWEET5	0.86	0	0.487	18.7787	At4g10850	Metabolite_transport
165	Bsv0100-00054721	KAL2896342.1	ABCG6	ABC transporter G family member 6	0.77	0	0.492	29.7023	AT2G39350	Metabolite_transport
180	Bsv0100-00050958	KAL2902805.1	SLC6A9	Sodium- and chloride-dependent glycine transporter 1	0.89	0	0.481	228.675	AT4G23930	Metabolite_transport
185	Bsv0100-00001213	KAL2921567.1	PSOMT1	(R,S)-reticuline7-O-methyltransferase	0.81	0	0.393	5.28754	AT1G63140	Chloroplast_biogenesis_import;Metabolite_transport

## Sheet: Cartegories
Module	Total Gene Count	Biological Role in Early C3→C4 Transition	Representative Genes (subset of full list)
Phenylpropanoid_lignin_lipid_cuticle	28	Surface cuticle/wax biosynthesis, lipid remodeling, phenylpropanoid–lignin network formation supporting early epidermal protection	GDSL esterases/lipases: GLIP4, F14O23.4, dl4155w, CPRD49, At5g03820, GDL17_ARATH, GDL14_ARATH, GDL71_ARATH, GDL28_ARATH, GDL56_ARATH
			O-acyltransferases & lipid enzymes: WSD1(4), FAR3, FAR_SIMCH
			Phenylpropanoid: COMT (3), CCoAOMT (2), OMT1, SCPL17
			Lipid transfer: EARLI1 (3), AIR1
Transcriptional Control	16	Key TFs programming early leaf fate, epidermal identity, and metabolic transitions	NAC: NAC021 (x2), NAC031, NAC098 (x2)
			MYB: MYB3, MYB108, MYB39 (x2)
			Homeobox/TCP: HAT3, STM, WOX9, KNAT2, TCP12
			B3/other TFs: REM9, VRN1
Chloroplast_biogenesis_import	11	Plastid ribosomal proteins, cytochrome biogenesis, protein import and assembly required for early chloroplast establishment	rpsG, rps4, rplB, ccsA, cob, GAPCP1, PAP26, HSP17.9-D, PCDH11X, hypothetical At4g27810, At5g16860
Cell Wall Expansion & Epidermal Patterning	8	Cell wall loosening, plasmodesmata regulation, and epidermal boundary formation to accommodate structural shift toward peripheral chloroplasts	PME68, XTH33, EPFL2, EPFL4, EPFL1, PDCB3, CEL3, 14KD_DAUCA
Redox / ROS Energy	7	ROS detoxification, plastid redox homeostasis, electron transfer stabilization during early chloroplast maturation	NUDT20 (x2), CYP77A3 (x2), GRXC3, PER57, NADH-ubiquinone oxidoreductase chain 5
Metabolite Transport	5	Sugar, glycine, ABC transport, inner-membrane solute transport supporting sink–source balance	yjiY, SWEET5, ABCG6, SLC6A9, PSOMT1
Isoprenoid / MEP – Carotenoid Pathway	3	MEP-pathway enzymes producing carotenoid and isoprenoid precursors required for chloroplast differentiation	PSY2, dxs, DXS2-like (Os07g0190000)
Auxin Homeostasis	3	Auxin conjugation, transport, and homeostasis—early leaf/facial patterning and chloroplast positioning	GH3.1, GH3.2, WTR8_ARATH
	81
Table 1. Functionally grouped ‘C4-ready’ genes (81-gene subset) enriched in young Bienertia leaves.
Genes were clustered into eight functional modules based on Arabidopsis orthologues, GO/KEGG annotation and literature curation. For each module, total gene number, proposed role in the early C3→C4 transition, and representative genes are listed; the full gene list is provided in Table S
Figure 2C visualizes the eight functional modules derived from this 81-gene subset, highlighting strong connectivity between chloroplast import/assembly, redox buffering, transcriptional control and metabolite transport, and their coordination with lipid/cuticle and cell-wall remodeling modules during the early C3→C4 transition
		Phenylpropanoid_lignin_lipid_cuticle	28
		Transcriptional Control	16
		Chloroplast_biogenesis_import	11
		Cell Wall Expansion & Epidermal Patterning	8
		Redox / ROS Energy	7
		Metabolite Transport	5
		Isoprenoid / MEP – Carotenoid Pathway	3
		Auxin Homeostasis	3
			81
