# Supplementary material
Source: Research Square preprint supplement (doi:10.21203/rs.3.rs-8983924/v1)
Supplement: Supplementary file 3 [file a343c408f261e20bdd5037c4.xlsx]

## Sheet: Supplement table 4
No	Bs_Genes	Measued Cq value									Normalized expression value									Average			Ratio(Early/mature)
		Young_1	Young_2	Young_3	Inter_1	Inter_2	Inter_3	Mature_1	Mature_2	Mature_3	Young_1	Young_2	Young_3	Inter_1	Inter_2	Inter_3	Mature_1	Mature_2	Mature_3	Young	Inter	Mature
1	Bsv0100-00000031	32.928	31.852	32.296	32.798	33.615	33.392	32.909	33.318	32.576	0.00118574	0.00104303	0.000787736	0.00074576	0.000625371	0.00058633	0.00052843	0.000466447	0.000249098	0.0010055	0.000652487	0.000414658	2.42489
2	Bsv0100-00000361	31.322	30.723	30.55	33.781	35.235					0.00360946	0.00228119	0.00264228	0.0003773	0.000203455					0.00284431	0.000290378		undetected in mautre
3	Bsv0100-00000950	25.9	24.831	24.373	26.544	27.423	26.938	31.172	30.594	29.195	0.154749	0.135466	0.19118	0.0569169	0.045721	0.0514031	0.00176148	0.00308182	0.00259509	0.160465	0.051347	0.00247946	64.7175
4	Bsv0100-00001213	30.379	30.382	30.424	31.071	30.499	31.023	31.75	31.854	31.793	0.00375493	0.00340531	0.00356471	0.0013433	0.00202481	0.00130295	0.000719359	0.000664244	0.000644738	0.00357498	0.00155702	0.000676114	5.28754
5	Bsv0100-00001620	28.425	28.745	28.595	28.717	28.656	28.913	30.825	31.696	31.104	0.0101808	0.00778547	0.0140723	0.00585547	0.00658318	0.00535833	0.000923244	0.000511847	0.000769389	0.0106795	0.00593233	0.000734827	14.5334
6	Bsv0100-00001666	32.3696	31.782	31.019	32.843		39.082				0.00174616	0.00109489	0.00190896	0.000722858		1.13575e-05				0.00158333	0.000367108		undetected in mautre
7	Bsv0100-00001675	29.863	29.301	28.768	32.335	35.101				34.904	0.00992305	0.00611259	0.00908688	0.00102796	0.000223258				4.96103e-05	0.00837417	0.000625609	4.96103e-05	168.799
8	Bsv0100-00001955	31.925	29.652	29.285	32.049	33.499	32.988			36.361	0.00237641	0.00479252	0.00635012	0.00125335	0.000677731	0.000775815			1.80706e-05	0.00450635	0.000902297	1.80706e-05	249.375
9	Bsv0100-00002448		30.972	30.612	31.762	32.32	32.204	29.887	29.83	28.237		0.00191957	0.00253113	0.00152921	0.00153452	0.00133587	0.0042924	0.00523353	0.00504126	0.00222535	0.00146653	0.00485573	0.458294
10	Bsv0100-00003093	29.384	28.774	28.805	30.394	31.7	30.877	34.413	35.138	32.788	0.0138305	0.00880782	0.00885679	0.00394708	0.00235836	0.00335145	0.000186311	0.000132108	0.000215056	0.0104984	0.00321896	0.000177825	59.0378
11	Bsv0100-00003176	35.414	34.383	34.799	38.301	37.26	38.98				9.30264e-05	0.000160071	0.000133859	1.0116e-05	2.27938e-05	7.25798e-06				0.000128985	1.33893e-05		undetected in mautre
12	Bsv0100-00003703	32.566	30.511	31.914	35.806	33.194	33.346	34.788	35.985	36.983	0.00152392	0.00264228	0.00102654	9.27046e-05	0.000837281	0.000605326	0.000143665	7.34438e-05	1.17417e-05	0.00173091	0.000511771	7.62836e-05	22.6905
13	Bsv0100-00003862	29.929	28.357	28.371	30.497	32.754	31.465	32.918	35.001		0.00316188	0.00365731	0.00313482	0.00119481	0.000379398	0.000841354	0.000306675	7.23825e-05		0.00331801	0.000805188	0.000189529	17.5066
14	Bsv0100-00003864																						FAIL
15	Bsv0100-00004168	31.807	29.835	31.259	30.645	31.265	31.067			33.45	0.000860224	0.00131292	0.000423485	0.00107832	0.00106495	0.00110863			9.92207e-05	0.000865545	0.00108397	9.92207e-05	8.72343
16	Bsv0100-00004814	31.714	30.999	31.123	33.67	35.481	35.898			35.851	0.000917503	0.000585924	0.000465349	0.000132474	5.73042e-05	3.89505e-05			1.87858e-05	0.000656258	7.6243e-05	1.87858e-05	34.9338
17	Bsv0100-00004828	29.131	28.09	28.568	30.391	31.112	31.187	33		34.974	0.00549753	0.00440086	0.0027347	0.00128591	0.00118409	0.00102015	0.000289731		3.45011e-05	0.00421103	0.00116338	0.000162116	25.9754
18	Bsv0100-00006562	27.454	26.299	26.378	28.854	30.808	30.708	35.993	35.273		0.017579	0.0152294	0.0124786	0.00373157	0.00146184	0.00142186	3.63925e-05	5.9945e-05		0.0150957	0.00220509	4.81688e-05	313.391
19	Bsv0100-00006321	31.531	31.699	30.811	35.962	34.952				34.927	0.00104159	0.000360678	0.000577697	2.70502e-05	8.26859e-05				3.56435e-05	0.000659988	5.4868e-05	3.56435e-05	18.5163
20	Bsv0100-00006329	30.711	30.759	31.327	30.012	30.045	30.864	30.961	30.843	31.313	0.00298304	0.00262221	0.00190631	0.00279875	0.00277365	0.00145476	0.00124296	0.00133866	0.000899244	0.00250386	0.00234239	0.00116029	2.15796
21	Bsv0100-00006112	30.776	29.205	29.446	30.56	31.735	30.876	33.13	32.031	31.712	0.00175782	0.00203184	0.00148801	0.00114376	0.000768855	0.00126557	0.000264765	0.000567143	0.000330973	0.00175922	0.00105939	0.000387627	4.53844
22	Bsv0100-00006302	23.619	23.598	23.636	24.866	24.845	24.815	25.454	25.642	25.63	0.430176	0.405564	0.368823	0.240815	0.272627	0.25052	0.0448111	0.0455628	0.0414927	0.401521	0.254654	0.0439555	9.13471
23	Bsv0100-00007162	28.211	27.825	28.021	30.845	32.425	33.091				0.010402	0.00528823	0.00399552	0.000938731	0.000476578	0.000272586							undetected in mautre
24	Bsv0100-00007186	30.855	29.841	30.122	30.977	31.945	32.288	31.097	31.52	30.593	0.00154733	0.00157875	0.00213581	0.00127968	0.000943951	0.00065238	0.00132757	0.00107907	6.17432e-10	0.00175397	0.000958671	0.000802211	2.18641
25	Bsv0100-00007879	30.901	30.671	29.763	30.993	32.184	31.762	33.608	33.61	31.899	0.00149878	0.000888094	0.00273926	0.00126557	0.000799841	0.000939382	0.0002329	0.000253452	0.000489637	0.00170871	0.0010016	0.00032533	5.25224
26	Bsv0100-00008407	26.993	26.704	26.893	28.868	29.727	29.435		34.294		0.0224989	0.0138882	0.0200257	0.00552044	0.00439171	0.00471345		0.000157758		0.0188043	0.0048752	0.000157758	119.197
27	Bsv0100-00008028	25.153	24.302	24.368	27.947	31.213	30.984			37.534	0.0805484	0.0734039	0.115263	0.0104526	0.00156785	0.00161081			9.85304e-06	0.0897384	0.00454374	9.85304e-06	9107.69
28	Bsv0100-00008718																						FAIL
29	Bsv0100-00009857	21.467	20.141	20.178	23.835	27.717	27.693		35.52	35.264	1.0367	1.31312	2.1038	0.180742	0.017689	0.0157664		6.74417e-05	4.75235e-05	1.48454	0.071399	5.74826e-05	25825.9
30	Bsv0100-00010308	28.723	28.223	28.251	30.867	31.342	32.158			35.771	0.00678235	0.00484597	0.0078125	0.00138107	0.00143374	0.000713895			3.34415e-05	0.00648027	0.00117623	3.34415e-05	193.779
31	Bsv0100-00010677	30.602	29.591	29.784	31.347	32.688	32.22	33.143	33.773	33.144	0.00540309	0.0052299	0.0044192	0.00183883	0.00120563	0.00154841	0.000559335	0.000553933	0.000510784	0.0050174	0.00153095	0.000541351	9.26829
32	Bsv0100-00010905	27.759	27.092	27.181	29.044	30.016	30.161	36.123		35.521	0.0387677	0.0295643	0.0268488	0.00907429	0.00768361	0.00645217	7.08929e-05		9.83306e-05	0.0317269	0.00773669	8.46117e-05	374.971
33	Bsv0100-00010906	25.819	25.513	25.542	29.914	29.534	29.437	36.415		33.994	0.0507658	0.0317082	0.0510835	0.0026736	0.00502034	0.00470692	3.32797e-05		0.000114608	0.0445191	0.00413362	7.3944e-05	602.066
34	Bsv0100-00010454	30.185	29.592	29.482	32.703	33.845	33.946				0.00246192	0.00187616	0.0033283	0.000386833	0.000252925	0.000206725				0.00255546	0.000282161		undetected in mautre
35	Bsv0100-00010562	19.325	18.644	18.871	19.34	19.468	19.371	21.138	21.124	20.718	6.75521	4.69459	4.40762	3.23104	3.92584	4.34995	0.586824	0.663883	5.79776e-07	5.28581	3.83561	0.416902	12.6788
36	Bsv0100-00010800	29.528	28.789	28.741	30.947	32.745	32.549				0.00573099	0.00414618	0.00471019	0.00103583	0.00039551	0.000469366				0.00486245	0.000633568		undetected in mautre
37	Bsv0100-00010483																						FAIL
38	Bsv0100-00011912	32.028	31.527	31.946	35.497	36.091	36.879			35.418	0.00101311	0.000621482	0.000510784	4.42182e-05	3.88965e-05	2.33373e-05			8.99154e-06	0.000715124	3.5484e-05	8.99154e-06	79.5329
39	Bsv0100-00011777	31.956	30.803	31.018	32.831	31.905	32.656	32.438	32.338	31.539	0.00106495	0.00102654	0.000971836	0.000280638	0.000707982	0.000435814	0.000232739	0.000279474	0.000132291	0.00102111	0.000474811	0.000214834	4.75299
40	Bsv0100-00011959	32.755	31.598	31.897	33.373	33.865	34.977	33.994	33.854	34.53	0.000612077	0.000591637	0.00052843	0.000192748	0.000181971	8.72189e-05	7.91528e-05	9.77191e-05	1.66398e-05	0.000577381	0.000153979	6.45039e-05	8.9511
41	Bsv0100-00012052	24.913	24.584	24.425	25.887	26.798	26.831				0.140437	0.076468	0.0938174	0.0345541	0.0243996	0.0247059				0.103574	0.0278865		undetected in mautre
42	Bsv0100-00012295	28.746	28.521	28.52	30.589	31.818	32.43		33.856	32.132	0.00985451	0.00499258	0.00548992	0.00132757	0.000751989	0.000509723		9.75837e-05	8.77039e-05	0.006779	0.000863093	9.26438e-05	73.1727
43	Bsv0100-00013033	22.606	26.374	26.568	27.353	27.946	28.046			35.642	0.694959	0.0221124	0.0212411	0.012508	0.0110103	0.0106426			7.69845e-06	0.246104	0.011387	7.69845e-06	31968
44	Bsv0100-00013886	31.103	32.716	31.191	34.377		33.564			31.898	0.00140618	0.000212095	0.00107533	0.000102648		0.000239448			0.000211948	0.000897871	0.000171048	0.000211948	4.23627
45	Bsv0100-00013965	32.895	33.13	33.054	33.062	32.916	32.961	35.489	35.928	35.985	0.000459388	0.000372622	0.000639841	0.000288129	0.000343596	0.000323937	3.64177e-05	2.72384e-05	2.61107e-05	0.000490617	0.000318554	2.99223e-05	16.3964
46	Bsv0100-00013994	34.507	33.408	32.728	35.484	37.511	36.28	36.31		35.3349	0.000132842	0.000131286	0.000370561	4.76554e-05	1.42765e-05	3.6443e-05	1.83355e-05		1.95713e-05	0.000211563	3.27916e-05	1.89534e-05	11.1623
47	Bsv0100-00014230	29.42	28.513	31.701	32.556	34.237				33.848	0.00451518	0.00390625	0.000755123	0.000362684	0.0001381				5.48557e-05	0.00305885	0.000250392	5.48557e-05	55.7618
48	Bsv0100-00014397	28.484	27.774	27.725	29.909	30.864	30.848		33.15	32.357	0.00863852	0.0065196	0.0118826	0.00227172	0.00143076	0.00157329		0.00016085	0.00015419	0.00901359	0.00175859	0.00015752	57.2219
49	Bsv0100-00014957	26.548	25.711	25.642	28.244	29.467	29.41	34.547		32.497	0.0330547	0.0272424	0.0503453	0.00720393	0.00376796	0.00426275	6.22313e-05		0.000139931	0.0368808	0.00507821	0.000101081	364.864
50	Bsv0100-00015473	31.031	29.499	29.915	33.944	34.096	38.58			33.885	0.00147814	0.00197217	0.0026041	0.000138579	0.000152279	7.40022e-06			5.34667e-05	0.00201814	9.94194e-05	5.34667e-05	37.7457
51	Bsv0100-00014437	37.458	38.439	36.578							1.71789e-05	4.01547e-06	2.56977e-05							1.56307e-05			undetected in mautre
52	Bsv0100-00016208	33.062	32.721	32.222	35.239	33.492	35.548		36.326	37.738	0.00036168	0.000211361	0.000526237	5.64761e-05	0.000231452	6.05296e-05		1.77971e-05	3.70011e-06	0.000366426	0.000116153	1.07486e-05	34.0906
53	Bsv0100-00015867	36.422	34.922	36.766	35.123						3.5226e-05	4.59683e-05	2.2558e-05	6.12046e-05						3.45841e-05	6.12046e-05		undetected in mautre
54	Bsv0100-00015398	29.835	29.11	29.695	32.22	36.416	35.301			34.273	0.00326659	0.00302259	0.00223424	0.00059948	4.0436e-05	9.73135e-05			3.11372e-05	0.00284114	0.000245743	3.11372e-05	91.2457
55	Bsv0100-00017092	36.359	36.149	35.501	37.942	38.695					3.54956e-05	2.29842e-05	3.99346e-05	1.13575e-05	8.33146e-06					3.28048e-05	9.84446e-06		undetected in mautre
56	Bsv0100-00016744	30.534	30.751	30.263	33.326	34.743	34.571	33.812	34.781	32.899	0.00201221	0.000969145	0.00150711	0.000278507	0.000128941	0.000161408	5.73042e-05	3.40733e-05	8.0704e-05	0.00149616	0.000189619	5.73605e-05	26.0834
57	Bsv0100-00017455	25.155	24.574	24.657	26.259	26.948	26.956	25.907	26.123	24.77	0.0837365	0.0701215	0.0734039	0.0373435	0.0286365	0.0316423	0.013735	0.0137636	0.0225927	0.0757539	0.0325408	0.0166971	4.53695
58	Bsv0100-00018224	29.207	28.346	28.455	31.338	34.382	33.114	33.872	34.447	34.286	0.00504825	0.00513294	0.00527724	0.0011048	0.000165601	0.000443125	5.49698e-05	4.29495e-05	3.08579e-05	0.00515281	0.000571175	4.29257e-05	120.04
59	Bsv0100-00017494	32.216	32.034	31.654	34.43				32.957	31.932	0.000627107	0.00039826	0.000574661	0.000129568				0.00012064	0.000157758	0.000533343	0.000129568	0.000139199	3.83151
60	Bsv0100-00018642	26.279	26.294	26.201	27.954	28.018	27.786	29.617	29.55	30.081	0.0523016	0.0435857	0.0518684	0.0131755	0.0138018	0.0170038	0.00252588	0.00266435	0.00182233	0.0492519	0.0146604	0.00233752	21.0702
61	Bsv0100-00017604	25.993	25.935	29.879	27.9	28.66	28.8	30.653	33.754	30.355	0.0468437	0.0272992	0.00196671	0.0119736	0.00874091	0.00881392	0.000511847	6.94339e-05	0.000470669	0.0253699	0.00984281	0.00035065	72.351
62	Bsv0100-00017657	28.751	28.524	28.561	30.391	30.854	30.821				0.00692486	0.00453714	0.00490341	0.0021299	0.00191028	0.00217164				0.00545514	0.00207061		undetected in mautre
63	Bsv0100-00017660	28.663	28.284	28.363	28.199	28.642	28.481	34.356	35.415	33.325	0.0123358	0.0145786	0.0148747	0.00983404	0.00733494	0.00758834	0.000118158	5.62807e-05	0.000222949	0.0139297	0.00825244	0.000132462	105.16
64	Bsv0100-00018111	30.232	29.45	29.75	31.798	31.956	31.896		34.523	31.53	0.00248076	0.00238797	0.00215067	0.000803174	0.000889943	0.00103081		4.07455e-05	0.000208452	0.0023398	0.000907977	0.000124599	18.7787
65	Bsv0100-00018748	25.715	25.575	25.534	27.121	27.848	27.713	28.681	30.791	27.827	0.137547	0.102949	0.0892502	0.0468762	0.033843	0.0364232	0.00513294	0.00237971	0.00766234	0.109915	0.0390475	0.00505833	21.7296
66	Bsv0100-00018914	31.729	31.151	30.925	31.89	31.607	32.786	35.36	36.163	35.248	0.00147303	0.00199832	0.00251888	0.000761431	0.000939382	0.000383895	5.89152e-05	3.35111e-05	5.87928e-05	0.00199674	0.000694903	5.04064e-05	39.6129
67	Bsv0100-00020061	27.665	26.923	27.186	29.865	31.543	31.54				0.0355995	0.0404421	0.0283993	0.00699723	0.00261314	0.00256647				0.0348136	0.00405895		undetected in mautre
68	Bsv0100-00018247	29.95	28.84	29.184	29.954	30.486	30.409	36.699		33.266	0.00730449	0.0107092	0.00710968	0.00657862	0.0054369	0.00562083	1.98019e-05		0.000176628	0.00837447	0.00587878	9.82149e-05	85.2668
69	Bsv0100-00019155	30.211	29.586	29.929	30.7709	31.212	30.991	32.711	31.379	30.709	0.00609567	0.00638543	0.00424212	0.00373442	0.00328703	0.00375493	0.000314206	0.00158313	0.00103942	0.00557441	0.00359212	0.000978922	5.69443
70	Bsv0100-00020584	29.041	28.067	28.24	31.521	34.418	33.283			34.676	0.013716	0.0183002	0.013678	0.00222035	0.000356206	0.000766727			6.64671e-05	0.0152314	0.00111443	6.64671e-05	229.157
71	Bsv0100-00020549	29.898	28.536	28.895	31.366	32.097	32.302		35.554	32.85	0.00757258	0.0132212	0.00868656	0.00247218	0.00177989	0.00151339		8.76431e-05	0.000235661	0.00982679	0.00192182	0.000161652	60.7898
72	Bsv0100-00021540	26.795	25.822	25.868	28.832	31	31.036	35.603	34.042	35.183	0.0650638	0.0867495	0.0708052	0.0143183	0.00380734	0.00363961	4.23288e-05	0.000249963	4.67718e-05	0.0742062	0.00725507	0.000113021	656.57
73	Bsv0100-00020760	25.91	25.999	26.031	27.125	26.982	27.303	28.781	28.486	28.601	0.0675453	0.0534747	0.058355	0.0234056	0.0283011	0.0237653	0.00450893	0.00557041	0.00508337	0.0597917	0.0251573	0.00505424	11.83
74	Bsv0100-00021441	30.785	30.985	30.519	32.51	32.716	32.652	30.654	30.494	30.461	0.00299547	0.00242298	0.00312484	0.00120396	0.00116456	0.00109565	0.00121907	0.00157766	0.00145779	0.00284777	0.00115472	0.00141817	2.00805
75	Bsv0100-00020019	27.222	26.628	26.892	30.021	31.822	32.179				0.0483949	0.0496177	0.0348186	0.00628009	0.00215365	0.00164808				0.0442771	0.0033606		undetected in mautre
76	Bsv0100-00020020	27.651	26.918	27.406	29.631	31.945	31.958	35.213		37.06	0.0359466	0.0405825	0.0243827	0.00822938	0.00197765	0.0019209	5.54674e-05		1.27336e-05	0.0336372	0.00404264	3.41005e-05	986.415
77	Bsv0100-00022186	27.081	26.694	26.291	29.446	31.625	30.617			36.91	0.0251203	0.0168396	0.0355502	0.00331678	0.00105466	0.00239626			3.03488e-05	0.0258367	0.0022559		undetected in mautre
78	Bsv0100-00021416	26.858	26.29	26.274	28.611	30.291	30.808	36.691	36.445	35.827	0.0293194	0.0222817	0.0359715	0.00591667	0.00265882	0.00209912	3.88157e-05	0.000103219	6.42921e-05	0.0291909	0.0035582	6.87757e-05	424.436
79	Bsv0100-00021682	23.489	23.031	23.243	24.555	25.887	25.764	29.941	29.325	29.129	0.302918	0.213307	0.294023	0.0984135	0.0562891	0.069252	0.00417792	0.014358	0.00667508	0.270083	0.0746515	0.00840367	32.1386
80	Bsv0100-00021511	31.046	28.676	28.964	29.815	31.957	32.844			33.871	0.00160858	0.00426275	0.00557428	0.00256825	0.000837862	0.000511847			0.000249443	0.0038152	0.00130599	0.000249443	15.2949
81	Bsv0100-00021915	32.571	33.085	32.83	33.66	34.496	33.061	34.197	33.973	34.452	0.000821757	0.000522964	0.000672583	0.000223258	0.000126814	0.00031727	0.000131924	0.000152913	0.000102081	0.000672435	0.000222447	0.000128973	5.21377
82	Bsv0100-00021839	21.26	20.716	20.694	21.959	22.357	22.353	28.44	27.551	27.734	1.42011	1.06142	1.72071	0.595016	0.65022	0.736624	0.0118251	0.0491045	0.0175547	1.40075	0.66062	0.0261614	53.5423
83	Bsv0100-00052052	29.689	29.091	29.09	30.302	30.78	31.295	32.674	32.245	32.683	0.0041204	0.00319715	0.00510809	0.00183246	0.00189446	0.00149774	0.000628413	0.00189708	0.000568324	0.00414188	0.00174155	0.00103127	4.01627
84	Bsv0100-00022620	30.944	29.825	29.653	30.594	32.009	31.605	33.949	33.502	33.401	0.00172642	0.00192223	0.00345763	0.0014967	0.0008082	0.00120814	0.000259676	0.000793765	0.000345506	0.00236876	0.00117101	0.000466316	5.07974
85	Bsv0100-00022461	27.0678	27.105	27.289	28.316	28.968	28.936	32.721	32.453	31.674	0.0253512	0.0126651	0.0177997	0.00725907	0.00665198	0.00768361	0.00060827	0.00164238	0.00114376	0.0186054	0.00719822	0.00113147	16.4435
86	Bsv0100-00022164	28.847	28.292	28.605	30.075	31.028	31.469				0.00738595	0.0055627	0.00714921	0.00214471	0.00159525	0.00132757				0.00669929	0.00168918		undetected in mautre
87	Bsv0100-00025048	32.126	30.667	31.07	34.898	33.03	33.684	34.626	34.64	33.985	0.00118245	0.00302049	0.00213285	0.000230013	0.000936781	0.000535807	7.76852e-05	8.91133e-05	0.000126726	0.00211193	0.000567533	9.78415e-05	21.5853
88	Bsv0100-00023783	31.658	31.476	30.99	31.623	31.586	31.794	32.028	32.252	32.335	0.00154733	0.00159525	0.00240791	0.000916232	0.000953156	0.000763545	0.00059328	0.000504101	0.000442818	0.00185017	0.000877644	0.000513399	3.60376
89	Bsv0100-00024000	35.053	34.432	34.723	36.722	38.909	37.438	36.5			0.000102933	0.000151122	0.000201211	2.27938e-05	5.3948e-06	1.45462e-05	1.80706e-05			0.000151756	1.42449e-05	1.80706e-05	8.39795
90	Bsv0100-00024968	26.095	26.049	26.034	26.889	27.122	27.3	33.216	34.424	33.719	0.0731499	0.0686308	0.0747387	0.0243827	0.0210359	0.0172053	0.000260397	0.000111861	0.000169668	0.0721732	0.0208746	0.000180642	399.537
91	Bsv0100-00024300	31.432	29.013	29.011	28.86	29.292	28.931	33.872	33.119	31.792	0.00180974	0.00879561	0.00949247	0.00621944	0.00467441	0.00555499	0.000165257	0.000276391	0.000645185	0.00669928	0.00548295	0.000362278	18.4921
92	Bsv0100-00024425	26.77	26.533	26.607	28.273	28.994	29.09	35.226		34.946	0.0266079	0.0195729	0.0174697	0.0056993	0.00498566	0.00467765	4.1891e-05		1.91274e-05	0.0212168	0.00512087	3.05092e-05	695.424
93	Bsv0100-00024426	26.778	26.829	26.489	27.87	28.93	28.448	32.361	32.481	32.356	0.0264608	0.0159423	0.0189586	0.00753592	0.00521181	0.00729943	0.000305191	0.000314424	0.000115166	0.0204539	0.00668239	0.000244927	83.5102
94	Bsv0100-00024754	30.94	30.358	30.078	30.946	31.67	32.042		34.51	32.87	0.00147814	0.00138107	0.00157547	0.000893652	0.000780129	0.000604487		7.70418e-05	8.06481e-05	0.00147823	0.000759423	7.88449e-05	18.7485
95	Bsv0100-00025152	28.014	27.515	27.333	30.667	34.146	32.878				0.0112339	0.00990931	0.0105618	0.00108432	0.000140222	0.000338631				0.0105683	0.000521056		undetected in mautre
96	Bsv0100-00025089	31.257	30.465	29.736	34.833	34.844	35.474				0.00118656	0.00128234	0.00199693	6.04038e-05	8.64365e-05	5.60083e-05				0.00148861	6.76162e-05		undetected in mautre
97	Bsv0100-00025066	23.842	23.306	22.953	25.251	27.144	27.053				0.202501	0.183265	0.219912	0.046295	0.0179733	0.0191967				0.201893	0.0278217		undetected in mautre
98	Bsv0100-00025468	31.876	31.185	31.963		39.298	35.116	34.42	37.3005	33.874	0.000772595	0.000778508	0.000426549		3.94375e-06	7.17829e-05	7.32404e-05	1.11353e-05	4.02124e-05	0.000659218	3.78633e-05	4.15294e-05	15.8735
99	Bsv0100-00026403	30.848	30.542	30.404	32.395	33.77	34.936				0.00157547	0.0012157	0.00125683	0.000327322	0.000181971	8.13217e-05				0.00134933	0.000196872		undetected in mautre
100	Bsv0100-00026876	29.296	28.51	28.2	31.297	34.155	34.253				0.00461965	0.00497186	0.00579089	0.000700659	0.00013935	0.00013056				0.00512746	0.000323523		undetected in mautre
101	Bsv0100-00028399	26.29	26.051	26.432	27.515	28.572	28.854			35.971	0.0792745	0.0576714	0.0405825	0.0148335	0.0116381	0.00830963			6.12895e-05	0.0591761	0.0115937	6.12895e-05	965.518
102	Bsv0100-00027361	27.941	27.888	27.942	28.575	29.823	29.609				0.0252425	0.0161424	0.014249	0.00711461	0.00488983	0.00492384				0.0185446	0.00564276		undetected in mautre
103	Bsv0100-00028428	34.596	32.064	33.643		36.15					0.000250483	0.000893032	0.000273912		6.09084e-05					0.000472476	6.09084e-05		undetected in mautre
104	Bsv0100-00026901	32.19	31.574	30.913	33.568	34.374	34.146			37.176	0.00132757	0.00125421	0.00181728	0.000223413	0.000208596	0.000212095			2.65855e-05	0.00146636	0.000214701	2.65855e-05	55.1562
105	Bsv0100-00028023	32.95	31.464	31.0361	32.438	33.696	32.732				0.000783923	0.00135358	0.00166865	0.000488959	0.000333737	0.000565181				0.00126872	0.000462626		undetected in mautre
106	Bsv0100-00029958	29.036	28.97	29.149	30.418	31.189	30.52				0.0118169	0.00762525	0.0061722	0.00198314	0.00189708	0.00261858				0.00853813	0.00216627		undetected in mautre
107	Bsv0100-00028441	34.73	33.135	32.282	35.897		39.212				0.000228265	0.000425074	0.000703579	4.44641e-05		6.33159e-06				0.000452306	2.53978e-05		undetected in mautre
108	Bsv0100-00028903	36.529	34.923	34.695	36.039	36.078	36.935				6.55975e-05	0.00012309	0.000132108	4.02961e-05	6.40252e-05	3.06873e-05				0.000106932	4.50029e-05		undetected in mautre
109	Bsv0100-00028292	19.563	19.631	19.491	20.283	21.387	22.226	31.635	31.537	29.931	8.39773	4.93825	4.9864	2.22993	1.69349	0.82188	0.00195991	0.00225446	0.00403281	6.10746	1.58177	0.00274906	2221.66
110	Bsv0100-00028623	27.918	27.204	27.731	27.93	28.88	29.121	33.478	33.552	34.158	0.0185685	0.014082	0.0108287	0.00822938	0.00541434	0.00576286	0.000295204	0.000284556	0.000168146	0.0144931	0.00646886	0.000249302	58.1346
111	Bsv0100-00028632	31.65	31.549	31.479	32.68	32.842	32.98	32.486	33.525	31.971	0.00164465	0.00163896	0.00160635	0.00107013	0.00106717	0.000872837	0.000342407	0.000193015	0.000511847	0.00162999	0.00100338	0.00034909	4.66926
112	Bsv0100-00028925	31.498	30.404	31.002	32.248	33.317	32.239				0.00155271	0.00153239	0.00112178	0.000412591	0.000249963	0.000663783				0.00140229	0.000442112		undetected in mautre
113	Bsv0100-00029764	32.748	31.133	31.914	33.222	37.714	36.446			33.83	0.000652832	0.000924525	0.000596165	0.000210047	1.18644e-05	3.59412e-05			0.000211069	0.000724508	8.59509e-05	0.000211069	3.43257
114	Bsv0100-00029463	29.146	28.663	28.96	29.822	29.985	29.969	33.394	33.166	33.43	0.00716906	0.00843732	0.00766234	0.00360946	0.00353028	0.00374453	0.000184256	0.000217304	0.000178845	0.00775624	0.00362809	0.000193468	40.0905
115	Bsv0100-00030293	28.592	28.256	28.161	28.179	28.397	28.417	28.255	28.229	28.275	0.0129581	0.0148643	0.0171102	0.00997132	0.00869258	0.00793255	0.00811046	0.00819523	0.00738595	0.0149776	0.00886548	0.00789722	1.89656
116	Bsv0100-00029362																						FAIL
117	Bsv0100-00029033	26.423	26.079	26.085	27.259	28.261	28.093				0.0523379	0.0307131	0.0338899	0.0131026	0.00831539	0.0117516				0.0389803	0.0110565	#DIV/0!	undetected in mautre
118	Bsv0100-00033139	31.368	31.331	32.02	32.462	33.144	32.586				0.00169912	0.000805962	0.000553933	0.000355713	0.000281808	0.000521878				0.00101967	0.000386466	#DIV/0!	undetected in mautre
119	Bsv0100-00030682	26.211	26.1	26.263	26.331	27.497	27.784	31.107	31.238	30.905	0.0606226	0.0302693	0.0299562	0.0249295	0.0141211	0.0145584	0.00152709	0.00141498	0.00160301	0.0402827	0.0178697	0.00151503	26.5888
120	Bsv0100-00030683	27.111	27.152	27.189	27.548	29.338	28.5579	32.035	33.657	31.939	0.0324869	0.0145989	0.0157664	0.0107241	0.00394161	0.00851428	0.000802617	0.000264582	0.000782837	0.0209507	0.00772666	0.000616679	33.9735
121	Bsv0100-00031570	28.897	27.875	28.235	28.802	28.728	28.969	30.979	30.768	31.237	0.00942037	0.00884452	0.00763583	0.00449644	0.00601592	0.00640316	0.00166877	0.00195991	0.00127349	0.00863357	0.00563851	0.00163405	5.28353
122	Bsv0100-00032598		37.161	38.546								2.41269e-05	1.02359e-05							1.71814e-05			undetected in mautre
123	Bsv0100-00032599	28.971	27.944	28.218	30.87	32.942	33.149				0.0138114	0.014358	0.0131572	0.00227961	0.000904244	0.000534694				0.0137755	0.00123951		undetected in mautre
124	Bsv0100-00032600	39.316	38.793	38.049					34.755		1.06189e-05	7.78431e-06	1.44457e-05					0.000285148		1.09497e-05		0.000285148	0.0383999
125	Bsv0100-00030414	28.71	28.604	28.288	29.56	30.51	30.288	39.047	37.763	37.237	0.0165503	0.00908688	0.0125341	0.00565209	0.00487967	0.00388465	1.60063e-05	3.54464e-05	4.99554e-05	0.0127237	0.00480547	3.38027e-05	376.412
126	Bsv0100-00030415	19.394	18.534	18.783	19.504	19.52	19.197	24.869	24.698	24.783	10.5487	9.76757	9.10715	6.01682	9.92454	8.47375	0.296684	0.303759	0.280292	9.80782	8.13837	0.293578	33.4079
127	Bsv0100-00031272	32.13	31.136	30.952	32.639		35.943		37.685	36.014	0.00154626	0.00157111	0.00197765	0.000668864		7.70952e-05		3.74156e-05	0.000116612	0.00169834	0.000372979	7.70137e-05	22.0524
128	Bsv0100-00030285	27.428	26.682	26.97	28.403	29.001	29.049	32.181	32.196	32.415	0.0402463	0.0344345	0.03125	0.0126038	0.0138882	0.00916913	0.00186708	0.00168038	0.00141302	0.0353103	0.011887	0.00165349	21.355
129	Bsv0100-00032016	34.374	32.995	34.276			36.52				0.000326416	0.000433104	0.000197481			5.16812e-05				0.000319	5.16812e-05		undetected in mautre
130	Bsv0100-00032777																						FAIL
131	Bsv0100-00032265	31.619	31.785	32.26	34.751	33.32	33.171	33.558	32.064	33.018	0.00111248	0.000946572	0.0011094	8.93607e-05	0.000259676	0.000280055	0.000138868	0.000396608	0.000204162	0.00105615	0.000209697	0.000246546	4.2838
132	Bsv0100-00034895	25.664	25.195	25.345	27.964	30.242	30.028				0.099098	0.0632408	0.0667078	0.0150823	0.00436743	0.00485605				0.0763489	0.00810193		undetected in mautre
133	Bsv0100-00034093	29.989	29.394	28.958	32.903		33.304	34.571	35.502	33.912	0.00494436	0.00344328	0.005452	0.000491678		0.000501313	0.000198717	0.000121395	0.000307314	0.00461321	0.000496495	0.000209142	22.0578
134	Bsv0100-00034094	31.631	30.745	31.137	33.007	36.023	36.612	34.904	34.617		0.00158423	0.00134984	0.00120396	0.000457481	7.94276e-05	5.06176e-05	0.000157758	0.000224189		0.00137934	0.000195842	0.000190973	7.2227
135	Bsv0100-00038953	30.992	30.537	30.405	31.851	32.913	32.658	35.3	34.81	34.999	0.00246705	0.00155918	0.0019997	0.00101945	0.000685764	0.000784467	0.00011989	0.000196117	0.000144665	0.00200864	0.000829892	0.000153557	13.0807
136	Bsv0100-00034165	30.695	29.763	30.235	33.093	36.058	33.968				0.00303098	0.0026662	0.00224978	0.000431007	7.75239e-05	0.000316392				0.00264899	0.000274974		undetected in mautre
137	Bsv0100-00034477	31.115	30.72	30.677	36.982	38.862			38.389	35.353	0.00226543	0.00137343	0.00165609	2.90924e-05	1.11006e-05			1.64107e-05	0.000113187	0.00176498	2.00965e-05	6.4799e-05	27.2378
138	Bsv0100-00034628	31.685	30.825	31.129	31.553	31.834	31.754				0.00152603	0.00127702	0.00121065	0.00125335	0.00144873	0.00146793				0.0013379	0.00139		undetected in mautre
139	Bsv0100-00034629	25.508	24.54	24.782	27.126	28.622	28.449	34.749		39.318	0.110414	0.09958	0.09855	0.0269607	0.0134244	0.0145081	0.000175651		7.24793e-06	0.102848	0.0182977	9.14495e-05	1124.64
140	Bsv0100-00036018			38.946									2.23701e-06							1			undetected in mautre
141	Bsv0100-00035627	33.952	33.104	33.74	34.599	34.23	34.192	34.102	33.74	33.39	0.000333506	0.000557786	0.000335128	0.000282982	0.000407758	0.000376777	0.000111706	0.000166291	0.000191416	0.000408807	0.000355839	0.000156471	2.61266
142	Bsv0100-00035316	31.446	29.735	29.876	35.809	35.281	35.32				0.000809882	0.00132206	0.00120229	2.66963e-05	4.07737e-05	2.33859e-05				0.00111141	3.02853e-05		undetected in mautre
143	Bsv0100-00037816	28.104	27.417	27.128	28.988	29.154	28.887				0.00821229	0.00659231	0.0080768	0.0030184	0.00284965	0.0020206				0.00762713	0.00262955		undetected in mautre
144	Bsv0100-00036723	37.003	36.087	35.554							1.72028e-05	1.61848e-05	2.34834e-05							1.8957e-05			undetected in mautre
145	Bsv0100-00037880	24.168	24.013	24.006	25.334	25.314	23.885	33.144	32.686	33.734	0.125695	0.0697821	0.0703162	0.0379962	0.0408081	0.0647489	0.00171331	0.00266066	0.00123438	0.0885978	0.0478511	0.00186945	47.3925
146	Bsv0100-00039213	30.026	28.694	38.701	32.38	34.125	35.085				0.00216713	0.00272033	2.65106e-06	0.00028753	9.08597e-05	2.75231e-05				0.00163004	0.000135304		undetected in mautre
147	Bsv0100-00038494	28.195	29.085	28.136	28.564	28.243	28.372	28.877	28.985	28.922	0.0119404	0.00615084	0.0193436	0.00651057	0.00876518	0.00779627	0.00356224	0.00335145	0.00349135	0.0124783	0.00769068	0.00346834	3.59777
148	Bsv0100-00037607	23.942	23.023	23.116	23.697	23.942	22.224	29.81	29.961	29.424	0.147011	0.1386	0.130308	0.118175	0.105623	0.204759	0.017277	0.0175912	0.0244843	0.13864	0.142853	0.0197842	7.00761
149	Bsv0100-00038184	27.595	27.089	27.217	29.906	30.844	30.702				0.0116866	0.00827514	0.0075936	0.00159746	0.000883183	0.000574263				0.00918512	0.0010183		undetected in mautre
150	Bsv0100-00038185	23.268	22.419	22.743	23.403	24.323	22.991	29.67	29.581	29.736	0.234555	0.210662	0.168755	0.144887	0.0811087	0.120324	0.0190377	0.0228922	0.0197227	0.204657	0.11544	0.0205508	9.95858
151	Bsv0100-00040075	29.655	29.668	29.867	32.357	31.223	31.852	35.024	33.839	33.737	0.00503777	0.00420406	0.00408627	0.000622776	0.0014967	0.00101521	5.9531e-05	0.000136293	0.000144564	0.0044427	0.0010449	0.000113463	39.1556
152	Bsv0100-00040026	26.862	25.906	26.131	27.343	27.766	28.619	31.413	32.395	30.562	0.0208184	0.016493	0.0170274	0.00979323	0.009999	0.00843147	0.00113665	0.000624505	0.00194502	0.0181129	0.0094079	0.00123539	14.6617
153	Bsv0100-00040236	30.076	30.848	29.972	33.544	33.816	31.874	35.251	36.392	39.742	0.00324178	0.00181225	0.00541809	0.000206296	0.000184128	0.000688145	4.29495e-05	1.97471e-05	1.9313e-06	0.00349071	0.000359523	2.15426e-05	162.037
154	Bsv0100-00040458	28.968	27.525	27.709	32.238	33.583	34.014				0.0048359	0.00536949	0.00570325	0.000329143	0.000177364	0.000200376				0.00530288	0.000235628		undetected in mautre
155	Bsv0100-00040459	26.752	26.846	26.571	29.931	30.197	Sorting	35.235	35.714	37.272	0.0490365	0.0426888	0.0482275	0.00719395	0.00667508	0.00623671	5.09344e-05	4.23288e-05	1.29832e-05	0.0466509	0.00670191	3.54155e-05	1317.25
156	Bsv0100-00040644	27.451	26.491	26.63	28.911	29.591	30.221		34.718		0.0138401	0.0109951	0.0120485	0.00330302	0.00282213	0.00277749		0.000124808		0.0122946	0.00296755	0.000124808	98.5077
157	Bsv0100-00044126	29.772	29.485	29.925	30.005	30.033	29.744	29.795	29.584	29.884	0.00400218	0.00466147	0.00559751	0.00239792	0.00253465	0.00301213	0.00188529	0.00221266	0.00179227	0.00475372	0.00264823	0.00196341	2.42116
158	Bsv0100-00042397	28.764	27.427	27.384	30.593	32.697	33.216				0.00557041	0.0057469	0.00714426	0.00102939	0.000327776	0.000348392				0.00615386	0.000568518		undetected in mautre
159	Bsv0100-00043939	30.016	28.979	29.349	30.763	31.192	32.15	34.159	33.791	34.213	0.00233883	0.00195991	0.00182992	0.000914962	0.000930311	0.000729401	0.000169433	0.0002373	0.000154833	0.00204289	0.000858225	0.000187189	10.9135
160	Bsv0100-00043115	29.201	28.403	28.388	29.845	30.499	31.106	30.72	30.607	31.371	0.00411469	0.00292165	0.00356224	0.00172882	0.00150398	0.00150398	0.00183755	0.00215664	0.00111017	0.00353286	0.00157892	0.00170145	2.07638
161	Bsv0100-00044831	29.726	28.621	28.756	32.525	35.387	35.206				0.00285954	0.00251191	0.00276022	0.000269767	5.07934e-05	8.77039e-05				0.00271056	0.000136088		undetected in mautre
162	Bsv0100-00045196	25.59	24.845	24.962	26.976	27.743	27.988	34.637			0.0502755	0.0344107	0.038287	0.01263	0.0101597	0.0130573	0.000121648			0.0409911	0.011949	0.000121648	336.965
163	Bsv0100-00045264	26.381	26.238	26.655	29.458	29.401	29.318	28.444	28.122	27.961	0.0634164	0.0650638	0.0454997	0.00998515	0.0115898	0.0110485	0.00564035	0.00816688	0.00824651	0.0579933	0.0108745	0.00735125	7.88891
164	Bsv0100-00045335	25.98	25.484	25.628	27.612	28.257	29.062	34.478	35.5		0.0383667	0.0220971	0.0241305	0.00812735	0.00711461	0.00620222	0.000135822	7.25834e-05		0.0281981	0.00714806	0.000104202	270.609
165	Bsv0100-00053407	31.991	31.467	32.861							0.00114853	0.00161416	0.00056675							0.00110981			undetected in mautre
166	Bsv0100-00045370	28.589	29.534	29.3468	31.48	33.753	32.475	32.724	32.577	30.521	0.0121407	0.00616365	0.00647547	0.00221727	0.00112022	0.00203043	0.000506202	0.000527698	0.000646528	0.00825995	0.00178931	0.000560142	14.7462
167	Bsv0100-00045885	22.944	22.852	22.857	22.693	22.548	22.621	22.984	23.061	23.163	0.454704	0.462652	0.75106	0.381036	0.454074	0.419866	0.211686	0.203486	0.189071	0.556139	0.418325	0.201414	2.76117
168	Bsv0100-00047218																						FAIL
169	Bsv0100-00047175	25.025	25.023	24.959	26.297	27.455	27.258	30.003	29.814	28.717	0.143587	0.140535	0.13556	0.0805484	0.0881436	0.0755199	0.00333754	0.00358205	0.00225759	0.139894	0.081404	0.00305906	45.731
170	Bsv0100-00046713	39.314	38.813	37.533							7.17296e-06	9.92157e-06	2.2232e-05							1.31089e-05			undetected in mautre
171	Bsv0100-00047155	27.222	27.021	27.122	30.672	34.337	33.35				0.0313151	0.0351825	0.0302693	0.00388196	0.000747313	0.0011071				0.0322556	0.00191212		undetected in mautre
172	Bsv0100-00046996	31.807	31.061	31.516		37.887		36.765		38.209	0.00130476	0.00213877	0.00143972		6.38037e-05		3.07512e-05		3.13522e-06	0.00162775	6.38037e-05	1.69432e-05	96.0711
173	Bsv0100-00048321	30.245	29.772	29.942	32.142	32.988	32.513	34.974	34.527	32.235	0.00385247	0.00522628	0.00428645	0.00140132	0.00190367	0.00197765	0.000106416	0.000136577	0.000197071	0.00445507	0.00176088	0.000146688	30.3711
174	Bsv0100-00048167	21.405	21.332	21.458	23.161	23.842	23.473	27.335	26.823	35.795	1.76541	1.81504	1.53475	0.708088	1.07848	1.04102	0.0212116	0.0284782	1.67092e-05	1.70506	0.94253	0.0165688	102.908
175	Bsv0100-00048492	32.227	32.757	31.775	33.683	34.229				34.934	0.00102086	0.0005574	0.000957792	0.000496816	0.000606166				1.29024e-05	0.00084535	0.000551491	1.29024e-05	65.5188
176	Bsv0100-00048651	34.222	34.353	35.777							0.000256101	0.000184384	5.97791e-05							0.000166755			undetected in mautre
177	Bsv0100-00048722	29.353	28.822	28.864	32.162	35.425	34.623				0.00748387	0.0085255	0.00720393	0.00142581	0.000264582	0.000364195				0.00773777	0.000684863		undetected in mautre
178	Bsv0100-00049137	26.645	26.367	26.538	28.058	29.155	28.745	30.317	30.27	30.197	0.0489007	0.0467464	0.0361215	0.0245183	0.0204182	0.0214185	0.00121907	0.00196399	0.000344072	0.0439229	0.0221183	0.00117571	37.3586
179	Bsv0100-00050453	27.636	27.144	26.996	30.244	32.071	32.471		32.685	33.858	0.0246034	0.0272802	0.0262962	0.00538813	0.00270529	0.00161864		0.000368257	2.72006e-05	0.0260599	0.00323735	0.000197729	131.796
180	Bsv0100-00050550	27.462	27.508	27.564	30.566	34.172	34.192			37.315	0.0277571	0.0211969	0.0177382	0.00431029	0.000630594	0.000490996			2.47696e-06	0.0222307	0.00181063	2.47696e-06	8975.02
181	Bsv0100-00050605	32.658	30.9	32.047	35.495	39.978	36.879				0.00075722	0.0020192	0.000793215	0.000141491	1.12712e-05	7.62449e-05				0.00118988	7.63358e-05		undetected in mautre
182	Bsv0100-00050754	25.167	24.741	24.867	28.463	32.705	32.131	34.878	34.418	33.607	0.136219	0.144286	0.115023	0.0185171	0.00174326	0.00204881	5.16454e-05	0.000110781	3.23696e-05	0.131843	0.00743638	6.49321e-05	2030.47
183	Bsv0100-00050768	28.271	28.449	28.425	30.191	32.858	31.696			33.677	0.0158431	0.0110409	0.00976611	0.00558975	0.00156785	0.0027698			3.08365e-05	0.0122167	0.00330913	3.08365e-05	396.176
184	Bsv0100-00050947	27.379	27.364	27.394	28.138	27.983	27.957	34.705			0.0396372	0.0330318	0.0321286	0.0155278	0.0185171	0.0179111	2.10912e-05			0.0349325	0.0173187	2.10912e-05	1656.26
185	Bsv0100-00050958	28.184	28.151	28.336	29.959	29.975	30.194	34.4	34.511	36.124	0.0181738	0.017277	0.0141898	0.00705568	0.00778547	0.00602009	9.08597e-05	9.74485e-05	2.87715e-05	0.0165469	0.00695374	7.23599e-05	228.675
186	Bsv0100-00051528	30.805	30.768	31.113	33.121	33.31	32.331	33.942	33.886	33.775	0.00368786	0.00312052	0.00243984	0.000490996	0.000461302	0.000863809	3.57921e-05	3.03909e-05	4.10289e-05	0.00308274	0.000605369	3.57373e-05	86.2611
187	Bsv0100-00051858	31.072	31.296	30.739	32.526	32.724	32.354	33.814	32.449	31.491	0.00306478	0.00216413	0.00316188	0.000741637	0.000692451	0.000850147	3.91128e-05	8.22856e-05	0.000199822	0.00279693	0.000761412	0.000107073	26.1216
188	Bsv0100-00052630	28.83	28.822	28.864	29.727	29.978	29.992				0.014498	0.0120235	0.0115978	0.00516148	0.00464534	0.00437046				0.0127065	0.00472576		undetected in mautre
189	Bsv0100-00052691	37.702	38.816	37.285							3.09436e-05	1.17906e-05	3.38379e-05							2.5524e-05			undetected in mautre
190	Bsv0100-00053610	26.841	26.811	26.821	27.987	28.093	28.208	31.38	33.01	32.108	0.0575516	0.0484621	0.0477949	0.0172412	0.0171577	0.015051	0.000211361	5.57758e-05	0.000130289	0.0512695	0.0164833	0.000132475	387.012
191	Bsv0100-00053676	33.515	34.181	32.971	36.292	35.266	39.255	33.617	33.839	39.796	0.000563616	0.000292962	0.000673049	5.45145e-05	0.000118897	7.11354e-06	4.48355e-05	3.13973e-05	6.31813e-07	0.000509876	6.0175e-05	2.56215e-05	19.9003
192	Bsv0100-00053734	30.152	30.287	30.293	30.302	30.848	30.49	30.425	29.983	30.452	0.00307542	0.0026736	0.00433726	0.00195177	0.00144071	0.001796	0.00121823	0.00167805	0.00120897	0.00336209	0.00172949	0.00136842	2.45692
193	Bsv0100-00053769	28.231	28.224	28.284	30.764	30.573	30.685	32.682			0.0219597	0.018199	0.017337	0.00251539	0.00307542	0.00270342	8.57205e-05			0.0191652	0.00276474	8.57205e-05	223.578
194	Bsv0100-00054067	27.848	27.843	27.943	30.408	30.699	30.412	33.937		34.689	0.0286365	0.0236995	0.0219597	0.00321938	0.00281822	0.00326659	3.59163e-05		2.17745e-05	0.0247652	0.0031014	2.88454e-05	858.549
195	Bsv0100-00054343	27.23	27.126	27.258	30.053	29.86	29.78	34.477	32.712	33.053	0.0270543	0.0244843	0.0249295	0.00307542	0.0038498	0.00426866	8.69774e-05	0.00029767	0.000232255	0.0254894	0.0037313	0.000205634	123.955
196	Bsv0100-00054417	31.518	32.185	31.192	35.562	33.613	36.233	36.542		35.674	0.00180223	0.00105466	0.00195991	0.000145167	0.000625371	9.15551e-05	2.05857e-05		3.9303e-05	0.0016056	0.000287364	2.99443e-05	53.6195
197	Bsv0100-00054721	27.469	27.757	27.65	28.636	28.673	28.623	31.39	31.588	31.794	0.022924	0.0158102	0.0189981	0.00821229	0.00876518	0.00951883	0.000739071	0.000648772	0.000555856	0.0192441	0.0088321	0.0006479	29.7023
198	Bsv0100-00054989	29.713	29.301	29.094	31.443	31.363	32.092	35.146	36.442	34.954	0.00483925	0.00542185	0.0069827	0.00117347	0.00135828	0.000859628	5.47038e-05	2.24333e-05	6.21882e-05	0.00574793	0.00113046	4.64417e-05	123.766
199	Bsv0100-00055108	29.823	29.233	29.279	31.599	31.806	32.064	36.247	38.204	36.382	0.00448399	0.00568352	0.00614232	0.0010532	0.000999158	0.000876475	2.55025e-05	6.61421e-06	2.3112e-05	0.00543661	0.000976279	1.84096e-05	295.314
