# Supplementary material
Source: Research Square preprint supplement (doi:10.21203/rs.3.rs-8983924/v1)
Supplement: Supplementary file 4 [file d14a1f5e1a65cb8d7b7cf5e2.xlsx]

## Sheet: Supplement table 3
No	Bs_Gene	Prmumer No.	forward primer sequences	reverse primer sequences
1	Bsv0100-00000031	primer1	GTTTGACACCGGAATGACTTTG	GAATGACACGACCATCGGAATA
2	Bsv0100-00000361	primer2	GGACAAACAGAGCAACAGAAAC	AACAAACCACCTCCACCTAC
3	Bsv0100-00000950	primer3	TGTATGTGTTGGTCGAAATCCT	ACGCTTGGAGGTTGGAAAT
4	Bsv0100-00001213	primer185	AAAGGCACTATCAACTAAGGG	TGCCACCAGAAGTGTTAATC
5	Bsv0100-00001620	primer193	GTGGTGCTACAAGGTTGTTACT	CCAATGAGCCACGGTGAAT
6	Bsv0100-00001666	primer4	CTCTCATGAAACCAATGGAGGA	GTGGAAGGGACACAGTAAGAAG
7	Bsv0100-00001675	primer5	GACGAAATTTGTCGCTGTTTCT	ATGAGAGCTTGACACACATACA
8	Bsv0100-00001955	primer6	GTGCTTGGAACTTCCTCCTAATA	CTCAAAGCAGAACCTGTGAGA
9	Bsv0100-00002448	primer7	CGTTGTACAAGGGATCGATCATA	TTGAACCTACCAACCAGTTCTC
10	Bsv0100-00003093	primer8	TCAAGAGACCAGGATGGAAATAC	GCTTCCTTGCAGTTGATTGG
11	Bsv0100-00003176	primer168	CCGCCACTATCAAGCCATTA	CTTGTGACAACACCTGTACTACT
12	Bsv0100-00003703	primer9	GGAGTAGTCCTCAGCCATAGA	AACATTGGTAAGGTCCAGAGATAG
13	Bsv0100-00003862	primer10	GCTCAGCAGTCTCAACTCTAAA	CCGCGATCAATCACTTGAAATC
14	Bsv0100-00003864	primer11	GGTCGAACTGTCGTTGATGT	TCACCGCTACTTCGCTACT
15	Bsv0100-00004168	primer12	TGGAGATTCCGCAACCATT	GTGAGTGGATTGTCAGCCATA
16	Bsv0100-00004814	primer13	CATGGGCATTGCCATCAATAG	TTGGGCCACGATCTCATTC
17	Bsv0100-00004828	primer14	AAAGTCAGGAGCGTGTGTAAG	CAGTAAGGTAAGCCCGAATCTC
18	Bsv0100-00006562	primer15	CCACCACCATCACCATCATTAG	CTCCTTCACCACCACCAATATC
19	Bsv0100-00006321	primer16	TGTGGTACGAGCTTGCATAC	ACGCCAAACCGTGCTATTA
20	Bsv0100-00006329	primer188	GGGAGTACACTGAGACTTAACAC	TGGGTTTCTTCTCCACTCAAG
21	Bsv0100-00006112	primer17	CGGCATATGATACAATGGGAGA	GGTTACAGTTGGCTCTGAAGTA
22	Bsv0100-00006302	primer177	CCTCCTTATGGGCAGGATTT	GAAAGTCAGTAGGGATTCTTCCA
23	Bsv0100-00007162	primer18	CTGGATCTTCTGATGGGTGTATAA	CGTCGAATCTTCAGAACCACTA
24	Bsv0100-00007186	primer19	TGGTGTCGAAGAAACCACAT	CCACGATGAATCCACCATGATA
25	Bsv0100-00007879	primer20	CGGCTCCAAGACATACAATCA	CTCTGTGATCCACCAATGTAAGA
26	Bsv0100-00008407	primer21	TCTTCGGGTATGTGTCTCTCT	TCGGAGTACACCCAGGTAAT
27	Bsv0100-00008028	primer22	CCCAACTTCTGGGACTACTATT	CTGGACCCTAACACAACTCA
28	Bsv0100-00008718	primer23	CCTACCATTGGGCCTTTCATA	CTGCATGAGTTGCAGGGA
29	Bsv0100-00009857	primer24	TTGGTAGTGGTTATGATGGTTAGT	CCTAGTGGCATCCACAACAT
30	Bsv0100-00010308	primer25	CTCACCACTCTCTCTCCTACTC	TGTTCCCACACTCGAATCTTAC
31	Bsv0100-00010677	primer26	GGATGCCTAGACTTGTTGAGAG	TGGATAAAGTCATCGGTGTAGC
32	Bsv0100-00010905	primer27	ATTGGACGGTTCCGATTCTAC	CGCTGTTGCTCGATTTGTTC
33	Bsv0100-00010906	primer28	CGTTGAAAGCGACACCATATC	CACTTGCTGGTAAGCATTAACT
34	Bsv0100-00010454	primer29	CCACTGCCTAATCTTCCATCTC	GAGTTTCTTGGCGTCAGAGT
35	Bsv0100-00010562	primer30	GGTATTACAGAACGACAATTGCTTA	CCTGGAATAGTCAGAGCCATAC
36	Bsv0100-00010800	primer31	CTTAGGCCAAGGCAAGTAGAA	ATCTCCTTAACTGCTCACAATCA
37	Bsv0100-00010483	primer32	AAGCATGTAGCCGATCAAGAA	AGAACAGAACTGAGCACTATGG
38	Bsv0100-00011912	primer33	TGCAAGGAAGAACCGAAGAATA	CCTTACCGTCCTCATCAACATC
39	Bsv0100-00011777	primer34	TGAGGCTAATGCATCAGTTGAA	CCACCATGGTAGCTAGACAAAG
40	Bsv0100-00011959	primer35	CCAGAATTTCATTCCTGCTTGTC	AGTTATCGCACTTGGATCTACAC
41	Bsv0100-00012052	primer36	CGGCTTGGATTGGTAGGATATT	CTCCACCGGAACCATAATTGA
42	Bsv0100-00012295	primer37	CTCTTGCCATCCGATGCTTAT	GGACTTCCATCATGCTCTTCTC
43	Bsv0100-00013033	primer38	CGGTAGTAGTGAGGAGAGTAAGA	TCCGCCACACTCACTTTATC
44	Bsv0100-00013886	primer39	TCATTTGGAGCAGAGTCAAGG	ACACAGCGACGAACATCAA
45	Bsv0100-00013965	primer197	AGTTGTTTGACTTCTCACCATTC	GTTAGGCCCGGTTGGAA
46	Bsv0100-00013994	primer40	TGAACACTCCTTGCAGTCAG	AGAGGCATGAGCTTGTAATGT
47	Bsv0100-00014230	primer41	CACCACCACTCTTACACGATAC	CTGCCATGTAATTCGGCATTG
48	Bsv0100-00014397	primer42	GTGAAGCAATACAAGTCCCAATAG	ACAAGCCATCTCCTCTTGAATAA
49	Bsv0100-00014957	primer43	CTGCTTTCGATTTCGATTACTCTC	CAGGAGATTTGGGATTCAAACAA
50	Bsv0100-00015473	primer44	CCAACATCACCACTTCCCATA	GCGATGGTGTGACGTAAGAT
51	Bsv0100-00014437	primer45	TCGGATCCTAGAGACCATATTCA	GGCATCACCTACTTGTCCATAC
52	Bsv0100-00016208	primer46	CTTCTAGGCTTTGCACCTTCTA	GGAACCTGAATCCTGTCATGT
53	Bsv0100-00015867	primer47	GGCGTTGTTGGCTCTAAATG	TCACCTTCAATGCCTCGATATT
54	Bsv0100-00015398	primer48	CTGCCATTCTTGATCCCAGATA	CTCCAAAGTACTCCATTGTCCA
55	Bsv0100-00017092	primer49	TGTTGAAGGAGGCTGAATCTATC	CCAGTTTCGCAACCAATGAC
56	Bsv0100-00016744	primer50	GCGAATAGCTCGTTCACAAATG	GCGATGTTCAAGAGCCAAATG
57	Bsv0100-00017455	primer51	AGGAAGCGAGATAGTGGTAGAA	GGAGAATTCAGTTGGCATGGA
58	Bsv0100-00018224	primer52	GTTCAGATGGCTCACTCTATACAA	GCTTTGGGTGCTCATCATTTC
59	Bsv0100-00017494	primer53	CTGTAGAATGCAGGACTCTTCC	AGACGTACTTGGTGCTTCTAAC
60	Bsv0100-00018642	primer169	GGATGCTACGAGGTTTGGT	GCTCCACAACGATTGGATTTC
61	Bsv0100-00017604	primer54	AGGCCTTAAGGTCACATTAGTT	CCGTTGTGGCTTCATCATTAC
62	Bsv0100-00017657	primer55	CTTCATGTTGACGCTGCTTATG	TGTGTGGGTTCATGCTAACT
63	Bsv0100-00017660	primer184	TGCTGCCACTGAACTTGA	ACCACCGCCACCATAAC
64	Bsv0100-00018111	primer56	GAGCAGACCACACAAACTCT	CGGAATTCCTAACTACCCTACAC
65	Bsv0100-00018748	primer57	TGCCTTGGCTCACACATTAC	CGTCTTCCATGTGTCCATTCTC
66	Bsv0100-00018914	primer190	CTTCCAGCGAAACAGCTAATG	AGCGGCCATTATTAAGCTAGAG
67	Bsv0100-00020061	primer58	CGTCTGCTGGTTCTGGTTAT	CACCTTACCCTGGTAATCCTTG
68	Bsv0100-00018247	primer59	GGTCCTTTAGAGCAGATTGTGA	GACTAGCCTTTCCTGTGTAGC
69	Bsv0100-00019155	primer60	GGGAGCTATTAGCACATCCAA	CAGCTACGAACACACCTGTTA
70	Bsv0100-00020584	primer61	ACGTCTCAATATCGTGGAGTTAC	CCTTGCCTTCCTTTCCTAGTT
71	Bsv0100-00020549	primer62	TTCTCCCACCACGACTTAGA	TGAATAGGAGAGCAGTGGTAGT
72	Bsv0100-00021540	primer63	ATCATGGGTCTTGTTGGAGTG	GAAGCAGCGACGCCTAAA
73	Bsv0100-00020760	primer172	CGAAATAGCGGGTTCGAGTT	TAGGACATGTCTCGGCTTCT
74	Bsv0100-00021441	primer179	GCAATGCCTAATAGGTGGTTAGA	GAATGGCAGCTGACTCAAGTA
75	Bsv0100-00020019	primer64	AGATGCCAAGGCGACAAA	ATCACCAGCAACTGCACTAA
76	Bsv0100-00020020	primer65	TGCAGTACATTGATGGAACCT	GGCCTTCATTGCCACAATAATC
77	Bsv0100-00022186	primer66	TGAGAAGAGTTTGTAGCACTGG	CTTCTCCTCCTCCTCCTGATAA
78	Bsv0100-00021416	primer67	CTTCGAGACCTCATCAACTCTAAC	CCGCTTAAGTTCCTCTAGCTTTA
79	Bsv0100-00021682	primer68	GGAGCATCCTGATAAGCTGTT	GACACCTTCACTCTCTTCTTGAG
80	Bsv0100-00021511	primer69	ACCTCCCTTGTCACTTTCTTG	GACAGTTTGTGGTGGTTGTTG
81	Bsv0100-00021915	primer182	CGCGAGAGTTACTTCTCTTACA	CCGTTGCATATCTCACAATCAC
82	Bsv0100-00021839	primer70	CCATTCGCAACCTCGACATAA	CAACCAGAGCAACACCAGTAG
83	Bsv0100-00052052	primer71	CTTGGAACCACCTACTCATGC	CAGTGAAGGCAACCCAAGAT
84	Bsv0100-00022620	primer72	CCGTGCTGTTAGGCTTTATCT	CCGCTTACGCTTCTTCTTCT
85	Bsv0100-00022461	primer73	GGTGATGCTAAAGTGGGAGATT	TCAGAAGCCATGTATCCAAGTG
86	Bsv0100-00022164	primer74	TTGAAGGTGAGGATCTCAAGC	CAGTTGCCTTAGCTTCAAGAATAG
87	Bsv0100-00025048	primer174	GCCTTTGCACTGCTATTAAGG	TAGGCACATACGAAGTCAGAAG
88	Bsv0100-00023783	primer189	CGACCGACAACTCTATACCAATAA	TGCCAGTTTGTACCAGAGTTAG
89	Bsv0100-00024000	primer199	ACATTGATTGTGGCATAGGAGT	GCGTTATAATAGGGTAAACTGTTGC
90	Bsv0100-00024968	primer183	GAATCTCACAGTTGCTACTCCA	GGGCTGAATGACACCACTAA
91	Bsv0100-00024300	primer186	CCAAGTTAAGGGAGAAAGCTACT	CATAGTGAGTTGTTGTTGTTGCT
92	Bsv0100-00024425	primer75	CCCAAATGTTATGCGGTCTCTA	GGTAATGGAGTTGGAGGAAGTG
93	Bsv0100-00024426	primer76	CGGCCTTGCAGTTCATAGA	GGTACTCGGTATCTTCGTTTCG
94	Bsv0100-00024754	primer77	TCATCAACAAGACCTCCAACAA	AGTGGTAGAACCGTAGCAAATG
95	Bsv0100-00025152	primer78	TGAGAAGCAAGCAGCAGAG	GGCTGCAGGTACCCATTATAG
96	Bsv0100-00025089	primer79	CCTCGTCTCTTATCTGCCTTTG	CCTCTTCCACCACCTTGATTC
97	Bsv0100-00025066	primer80	ATGATAACGATGGTTGCCATTAC	GAACGCCTCATTATCACCATATTC
98	Bsv0100-00025468	primer81	CTTGACCAACAACCGTCTAAATC	TCACTCTTCTCAAGCCCAATC
99	Bsv0100-00026403	primer82	GAAAGGAGGCAACAACAACAA	CTCCCTCCTCTAGCCCTAATAA
100	Bsv0100-00026876	primer83	AGAGTGAACTTGTCGAGTCTTC	ACATCCTTAGCCACCATCAC
101	Bsv0100-00028399	primer84	ACAATCCTTGGGCGTAGATG	CAAGGCTTGCGTTCCAATAAC
102	Bsv0100-00027361	primer85	TCTTCGGGTATGTGTCTCTCT	TCGGAGTACACCCAGGTAAT
103	Bsv0100-00028428	primer86	AGATGCAGACGATCCAATCC	GCCTGTGACTTCTTAGGTACTG
104	Bsv0100-00026901	primer87	AGGAGAAGGAAGAGAGGATTACA	GTCAGTGTCAGTGTCAGCTAAA
105	Bsv0100-00028023	primer88	TCCAACTATTCTTCCTGCACTC	CGCTGTTCTCTCTGATGAAGAT
106	Bsv0100-00029958	primer89	GTGAAGTTGGCAGCATTGTC	AGGAGGATGATGATCAAGGAAAG
107	Bsv0100-00028441	primer90	CAACTGCCAACGGTTCTAATC	CCAAGCTCTCGATCTTATCCTC
108	Bsv0100-00028903	primer91	CTGGTCGTCCACTAGATTATCG	CAAGCACATGATCCACAACAC
109	Bsv0100-00028292	primer92	CACCAACACAGCCTTCATATTC	TCGGAGTCTGAGAGGATCAA
110	Bsv0100-00028623	primer93	ACGCTCCTATGATGCATTACTT	GAAGGCCTGTTAGAGTGTAGATG
111	Bsv0100-00028632	primer181	GCTGCCACTTGATGCTCATA	TACTCACGAGCTGCTGATAGAT
112	Bsv0100-00028925	primer94	CTCCCAGAATGAGATGGACTTC	CTTGACATGTGCTAGGGTTAGA
113	Bsv0100-00029764	primer95	AAAGCCCACGTATGGTTCTC	CAGCTTCCCTTTCTCCTCATC
114	Bsv0100-00029463	primer170	TACCATACGTGGATTCACAAGAG	TTCCGGAAACTTGTCCATGA
115	Bsv0100-00030293	primer187	CGAACGAGGAAGATGTGAACT	TTGGTCCATCTCCAATTCTCC
116	Bsv0100-00029362	primer96	CCTACCATTGGGCCTTTCATA	CTGCATGAGTTGCAGGGA
117	Bsv0100-00029033	primer97	CTCCGTTCCTCAATATGCTAGTC	GCAGCAGATAGTTGGTCAGT
118	Bsv0100-00033139	primer98	GAGGTGTCGGATTTGGTTACA	GTGAGTGAAGAAGTCTCGCTAAT
119	Bsv0100-00030682	primer99	GCCTAACAAAGCCCACATTTC	TCCTGCTTCTTCTTCACATTCT
120	Bsv0100-00030683	primer100	GTTATCAAGTGCCTAGGGAAAGA	CAGCACGTTCCAGAGAGAATAA
121	Bsv0100-00031570	primer101	GTCATTGATCACTCGTTGGAGA	TGGTGTTGTCTTGTGTCAGTAA
122	Bsv0100-00032598	primer102	GAGGCCAAAGGGAGAATGAA	GCTAGCTGCACCACCAATA
123	Bsv0100-00032599	primer103	GTGGAGGATAGTGAGGGTAATG	GGGTCCAATAGTAGTGATGTTAGA
124	Bsv0100-00032600	primer104	GGAAGCTGAAGCCGTCAT	TAAAGATGGCGTTGGTGAGAA
125	Bsv0100-00030414	primer105	GTACGCTGTGGTCAAGTCTAAT	GAGAACGCTCCTCCTGAATAAA
126	Bsv0100-00030415	primer106	GCCAGAGCTAGTAGGAAAGAATG	GTCAAGTGGTATCCAAGGCTTAT
127	Bsv0100-00031272	primer107	GAGGATTGTAGTGGAGGAGAGA	CTCGAGCTTGAGGTTGCTTAT
128	Bsv0100-00030285	primer108	GCTGCCAAGAATCGTTACAATC	AGGCAACTACAACACCAGAAG
129	Bsv0100-00032016	primer109	GCTCACTTTCCAACAACCAC	CCGGCAGACTAAACCCATTA
130	Bsv0100-00032777	primer110	TGATGAGCAACCCAGATCAC	ACTTCATCATCCTCTTCCTTAGC
131	Bsv0100-00032265	primer192	CAAACCAGTGGCTTCAAACAAG	GCGTTCCAAGCAAGATCTTAAAC
132	Bsv0100-00034895	primer111	TGAACCCGAACACACTCATTAT	CATCTTTCTGGCTTAAACTCGTTAC
133	Bsv0100-00034093	primer112	TGGGTGGAATGGCGAATAAG	GTGGTTTGTGAAAGTCGAGGA
134	Bsv0100-00034094	primer113	CAGCAACAACAACAACGACAA	GTAGCACCAAGTGGATGATGAG
135	Bsv0100-00038953	primer114	GGCATTGCCTATGGTAATGTATG	GGAGTCTTGCCACAATCTCT
136	Bsv0100-00034165	primer115	CCAACGGTGTATGAGCTTGA	ACAGGGACAGGTGGAGAATA
137	Bsv0100-00034477	primer116	CCATGGTCCTGCGTTTACTT	AAAGGGATCTCCAATCCTCATTAC
138	Bsv0100-00034628	primer117	AGGTGACTTGCTCAACCTTAAC	GGCAGCCTCAGCATCAATAA
139	Bsv0100-00034629	primer118	GATGTTCTAGGAGGGTTGGTTC	CAAAGACATACAGCAGCCTCTA
140	Bsv0100-00036018	primer119	GAAGCCAAAGGTACCAGTAAGG	TGCCTGTAAGTGTAAGCAAGAG
141	Bsv0100-00035627	primer173	AAGAAGGCCGAGTTCAACAG	CGAGTCAAGGAACACCACAA
142	Bsv0100-00035316	primer120	AGGAAGAGGAGAAAGGAAGTTG	GTCGGAGTTAGTGGAAGAAGTAG
143	Bsv0100-00037816	primer121	GAGCGCAATACGAAGCAATTC	CTTCGTCCATTGTCGTCATCA
144	Bsv0100-00036723	primer122	GGAGTACAAGTCCTCTTTGGTATG	CAGCTCTGCTTCTAGCCATTTA
145	Bsv0100-00037880	primer123	AGGGTATTGGAAAGAGAGCATAG	CATTACCTTCTTCTTCTGCTTTGG
146	Bsv0100-00039213	primer124	GGCTGTTGGATCCTCACTATG	TCTTCCTTCGCTTCTCTGTTG
147	Bsv0100-00038494	primer196	TCCTGTGAAACATGGAAACCT	AATCAACTCGTGGGCTGTC
148	Bsv0100-00037607	primer125	ACGGTTACATATGTGGGCATAC	TACCCTGCAACTTGGCTATTC
149	Bsv0100-00038184	primer126	TGTACCTACGAGAAGCCGAA	CGAAAGAGCGGTTAGCAAGA
150	Bsv0100-00038185	primer127	CCTGAATCACAAGTACCACACT	ACCATCACCGAGAGGAAGA
151	Bsv0100-00040075	primer171	GTGAAGGCTACTCGTCTCATT	CTCCATCAATCTCCTGTAGAGC
152	Bsv0100-00040026	primer128	CGATTGAGATGGAGCCTAAGAC	CACCTTCATTTATCGGCAACAAT
153	Bsv0100-00040236	primer191	TGTTGGGATTTGAGGGTAGC	CTCCTTTCCCTGCTCATGATT
154	Bsv0100-00040458	primer129	AGAGTGAACTTGTCGAGTCTTC	ACATCCTTAGCCACCATCAC
155	Bsv0100-00040459	primer178	CGAGATTATGATTGCGGACAAC	CGGCATAGCTCACCATGT
156	Bsv0100-00040644	primer130	CGTGCTGAGGCTGATGTTAT	CCTCGATGTTAGGTGGGATTAG
157	Bsv0100-00044126	primer194	GTACCGTCTTCATACAGAGATCAAT	ACAAGCTCATACTCACACTTCTT
158	Bsv0100-00042397	primer131	GCTGTGGCATTCTTGATGATAC	TCTGGCAAAGTCACCTCTTC
159	Bsv0100-00043939	primer132	GGCATTGCCTATGGTAATGTATG	GGAGTCTTGCCACAATCTCT
160	Bsv0100-00043115	primer133	TGTGGTTGGAGATCAAGAAGAA	CCTGCATCCTCATCCTTAGTT
161	Bsv0100-00044831	primer134	CGTGCTGCTACTGAACAGAATA	GCAAGTACTCTTTGCTGCTCTA
162	Bsv0100-00045196	primer135	CTTTACACAAGTGCTACATGCTAAG	CCAATGTTAGAGTTCTCGGTGT
163	Bsv0100-00045264	primer176	ACGAGAGTAAGCCCTTCAATAAC	GTGACTACTTCCTTCTTAGCTTCA
164	Bsv0100-00045335	primer136	GATGGTTTAAAGCCCAAGAAGTTAG	GGCCAATAGTGGGTCTTAATAGT
165	Bsv0100-00053407	primer137	CTACGTCTAATCCAAGCACCTC	GTTGGCTCCATCTCCATCAA
166	Bsv0100-00045370	primer138	CGTACCAGTTCATCATCGACAT	TCTTCTCTCTTCCTCTCTCCAC
167	Bsv0100-00045885	primer195	GTGTTCCAATTTCTGGCCTTG	GCGCGAGATGTACCTTGT
168	Bsv0100-00047218	primer139	ATCGTCGGCAACCTCTTTC	GTCTTCTGGCCCATCTTCATAG
169	Bsv0100-00047175	primer140	TCAACAGCAACCTCTATACAGATAC	CACTAGCACCTCCTGTGATAAG
170	Bsv0100-00046713	primer141	CCCTTCCTTCTGCATTCTCTAC	GAAGCCAAGGAGAAGTTGGT
171	Bsv0100-00047155	primer142	GGAATTGATGAGAGGCAGTTCTA	CATTGCCCTAACATGATCCAAAG
172	Bsv0100-00046996	primer143	CTTGACCAACAACCGTCTAAATC	TCACTCTTCTCAAGCCCAATC
173	Bsv0100-00048321	primer144	GCAGCATCATATTTACGCATACC	GTCAAATACTCCTGTTCCTCCAT
174	Bsv0100-00048167	primer145	CCATTCGCAACCTCGACATAA	CAACCAGAGCAACACCAGTAG
175	Bsv0100-00048492	primer146	GGATGCCATGGCCAGATATAA	TGGTGTGAGTGCCACATAAG
176	Bsv0100-00048651	primer147	GAGTAGGCAGTTGGGTATTCTG	GCGAAGGAGAGAGTCAACATAG
177	Bsv0100-00048722	primer148	CTGGATCTTCTGATGGGTGTATAA	CGTCGAATCTTCAGAACCACTA
178	Bsv0100-00049137	primer149	GCCCTCTCATTGGAGGATTAG	GCCACAGTAGTTAAGCAACAAG
179	Bsv0100-00050453	primer150	GGTGGTCAAGTATGTAGCAATAGA	AGAGAAAGCCTTAGCAGCAATA
180	Bsv0100-00050550	primer151	CGATCGATGAGGAGCGAATC	TCATCTCCTGCCATGACAAC
181	Bsv0100-00050605	primer152	AGTGGCGGTGGAAAGAAA	GAGAAACCGAGGATGGTGAG
182	Bsv0100-00050754	primer153	CCCAACTTCTGGGACTACTATT	CTGGACCCTAACACAACTCA
183	Bsv0100-00050768	primer154	CGGCTAGGTTGGAGCAATAA	TCCACACAGTCCACAATATCAC
184	Bsv0100-00050947	primer155	CCTAAGAGAGAAGAGAGCGTCTA	GATCTCTTGCTACCGCCATAC
185	Bsv0100-00050958	primer180	GACGGAGTTGAGAGAGTTAAGC	GCACTGAGCCATCAGAAATAGA
186	Bsv0100-00051528	primer156	TGATGGCCTTATCTGTGTCTATG	GATTTCCGAGTCTTCAGTGGT
187	Bsv0100-00051858	primer157	TCCAGACCAGAATGATGCTTAC	AGGCAAGGGTTCCAACAATA
188	Bsv0100-00052630	primer158	CCACTCGCAGTTAGAAGGTTAG	TCATAACTTTGGCACCATGTTTAG
189	Bsv0100-00052691	primer159	TTGGCTTAGCTTCTGCTCTAC	CTCTACAACAGCAGTTCGATCA
190	Bsv0100-00053610	primer160	CAACTTCTCCTTGGCTTCCT	GTACTGGTAGTGGAACCATCTAAT
191	Bsv0100-00053676	primer161	TTGTGGTGAAGACATGCAATAC	CGTAGAAGCTCCAGTCATAGTC
192	Bsv0100-00053734	primer198	TGTTGATGCCCTTCTTCCTC	GAGCGTAATGAGTACCAGAATCA
193	Bsv0100-00053769	primer162	CGATCGATGAGGAGCGAATC	TCATCTCCTGCCATGACAAC
194	Bsv0100-00054067	primer163	AGCAAGCTGAGGCAAGAA	CCTTCATTTCGGCAAACCATAG
195	Bsv0100-00054343	primer164	GAGGCTATGGTGTTCCTAAGTC	GGAGCACAAATACGGAGAGAA
196	Bsv0100-00054417	primer175	GGAGAATATCCCACCTTTCAGT	GGGTAATATCTTGAAGTGGCTTTC
197	Bsv0100-00054721	primer165	GAGCAGTACTAGTCACAGGATTC	GTGTAGAAGGTGGTGGACATAG
198	Bsv0100-00054989	primer166	CAGGAATCGAGGAAGTCTGATG	TGCTAGCAGCAATGAGAGATAG
199	Bsv0100-00055108	primer167	CTGGCTCAACTCAACATAATGATAC	CCTATCGCTTACTGCTCCTTTC
