# Supplementary material
Source: Research Square preprint supplement (doi:10.21203/rs.3.rs-8983924/v1)
Supplement: Supplementary file 5 [file e5c8afb4d538f1a165b69cdc.xlsx]

## Sheet: Supplement table 5
No	No.	Bs_Genes	NCBI_DB	Name	Description	Val_1	Val_2	Avr. FPKM	q-PCR Ratio(Early/mature)	At_gene	C4_ready_modules
1	1	Bsv0100-00000031	KAL2932951.1	GLIP4	GDSL esterase/lipase 4	0.74	0	0.345	2.42489	At5g03610	Phenylpropanoid_lignin_lipid_cuticle
2	2	Bsv0100-00000361	KAL2895234.1	NAC031	Protein CUP-SHAPED COTYLEDON 3	2.19	0	1.01	undetected mature	AT1G76420	Transcriptional_control
3	3	Bsv0100-00000950	KAL2892669.1	SOT15	Cytosolic sulfotransferase 15	18.71	0	14.207	64.7175	AT5G07010
4	4	Bsv0100-00001666	KAL2920930.1	Cht9	rsca Basic endochitinase A	1.89	0	0.813	5.28754	AT3G12500
5	5	Bsv0100-00001675	KAL2920939.1	REM9	B3 domain-containing protein REM9	0.72	0	0.492	14.5334	At5g25470	Transcriptional_control
6	6	Bsv0100-00001955	XM_010673125.4		hypothetical protein	4.16	0	3.876	undetected mature	At4g27810	Chloroplast_biogenesis_import
7	7	Bsv0100-00002448	KAL2921394.1	WTR8_ARATH	WAT1-related protein At1g44800	1.76	0	0.788	168.799	AT1G44800	Auxin_homeostasis
8	8	Bsv0100-00003093	KAL2936055.1	Ankrd16	Ankyrin repeat domain-containing protein 16	2	0	1.418	249.375	AT4G05040
9	9	Bsv0100-00003703	KAL2942885.1	AAE6	Probable acyl-activating enzyme 6	2.73	0	1.116	0.458294	AT5G16340
10	10	Bsv0100-00003862	KAL2894296.1	F14O23.4	GDSL esterase/lipase At1g71691	5.75	0	2.726	59.0378	AT1G71691	Phenylpropanoid_lignin_lipid_cuticle
11	11	Bsv0100-00003864	KAL2894298.1	GDL17_ARATH	GDSL esterase/lipase At1g33811	4.53	0	4.078	undetected mature	AT1G33811	Phenylpropanoid_lignin_lipid_cuticle
12	12	Bsv0100-00004168	KAL2937177.1	DIR23	Dirigent protein 23	0.71	0	0.42	22.6905	AT2G21100
13	13	Bsv0100-00004814	KAL2920655.1	COMT	Caffeic acid 3-O-methyltransferase	1.68	0	1.001	17.5066	AT5G54160	Phenylpropanoid_lignin_lipid_cuticle
14	14	Bsv0100-00004828	KAL2920684.1	Os03g0733400	Zinc finger BED domain-containing protein RICESLEEPER 2	1.17	0	0.622	FAIL	XP_020886653.1
15	15	Bsv0100-00006562	KAL2901726.1	PME68	Probable pectinesterase 68	18.46	0	10.164	8.72343	AT5G47500
16	16	Bsv0100-00006321	KAL2895223.1	KCS17	3-ketoacyl-CoA synthase 17	0.91	0	0.427	34.9338	AT1G04220
17	17	Bsv0100-00006112	KAL2920644.1	MYB3	Transcription factor MYB3	0.82	0	0.314	25.9754	AT3G61250	Transcriptional_control
18	18	Bsv0100-00007162	XM_021889790.1		ago F-box/WD repeat-containing protein 7	1.06	0	0.796	313.391	AT3G50390
19	19	Bsv0100-00007186	KAL2940073.1	MLP31	MLP-like protein 31	3.16	0	1.613	18.5163	AT1G70870
20	20	Bsv0100-00007879	KAL2944798.1	LPA1	P-loop NTPase domain-containing protein LPA1	1.02	0	0.623	2.15796
21	21	Bsv0100-00008407	KAL2896095.1	AS	Hydroquinone glucosyltransferase	1.07	0	0.666	4.53844	AT4G01070
22	22	Bsv0100-00008028	KAL2926471.1		hemH Ferrochelatase	11.49	0	5.513	9.13471
23	23	Bsv0100-00008718	KAL2939795.1	GG3	Guanine nucleotide-binding protein subunit gamma 3	5.63	0	2.969	undetected mature
24	24	Bsv0100-00009857	KAL2933059.1	yjiY	Inner membrane protein YjiY	1280.55	0	718.592	2.18641
25	25	Bsv0100-00010308	KAL2932614.1	Y2124_NOSS1	Uncharacterized WD repeat-containing protein all2124	1.66	0	0.855	5.25224	AT1G24530
26	26	Bsv0100-00010677	KAL2922233.1	MYB108	Transcription factor MYB108	0.66	0	0.434	119.197	At5g49620	Transcriptional_control
27	27	Bsv0100-00010905	KAL2943538.1	NAC021	NAC domain-containing protein 21/22	5.17	0	2.716	9107.69	AT1G56010	Transcriptional_control
28	28	Bsv0100-00010906	KAL2943539.1	NAC021	NAC domain-containing protein 21/22	6.57	0	4.998	FAIL	AT1G56010	Transcriptional_control
29	29	Bsv0100-00010454	KAL2921108.1	Exd2	Exonuclease 3'-5' domain-containing protein 2	1.89	0	0.796	25825.9	AT3G12430
30	30	Bsv0100-00010562	KAL2936096.1	rps4	30S ribosomal protein S4, chloroplastic	0.73	0	0.628	193.779		Chloroplast_biogenesis_import
31	31	Bsv0100-00010800	KAL2892531.1	HAT3	Homeobox-leucine zipper protein HAT3	2.34	0	1.268	9.26829	AT2G44910	Transcriptional_control
32	32	Bsv0100-00010483	KAL2897115.1	GAPCP1	Glyceraldehyde-3-phosphate dehydrogenase GAPCP1, chloroplastic	2.5	0	1.717	374.971	AT1G79530	Chloroplast_biogenesis_import
33	33	Bsv0100-00011912	KAL2897771.1	fam26e	Protein FAM26E	0.86	0	0.431	602.066	At4g22140
34	34	Bsv0100-00011777	KAL2933028.1	tc1a	Transposable element Tc1 transposase	0.9	0	0.57	undetected mature
35	35	Bsv0100-00011959	XM_057393257.1	EPFL4	EPIDERMAL PATTERNING FACTOR-like protein 4	3.35	0	1.482	12.6788	AT4G14723
36	36	Bsv0100-00012052	KAL2921126.1	dl4155w	GDSL esterase/lipase At4g16230	21.84	0	19.62	undetected mature	AT4G16230	Phenylpropanoid_lignin_lipid_cuticle
37	37	Bsv0100-00012295	KAL2935120.1	GSTU9	Glutathione S-transferase U9	0.64	0	0.434	FAIL	AT5G62480
38	38	Bsv0100-00013033	KAL2904229.1	WSD1	O-acyltransferase WSD1	16.96	0	13.855	79.5329	AT5G53380	Phenylpropanoid_lignin_lipid_cuticle
39	39	Bsv0100-00013886	KAL2938709.1	SALAT	Salutaridinol 7-O-acetyltransferase	0.62	0	0.345	4.75299	AT1G24430
40	40	Bsv0100-00013994	KAL2923367.1	PDCB3	PLASMODESMATA CALLOSE-BINDING PROTEIN 3	1.4	0	0.799	8.9511	AT4G13600
41	41	Bsv0100-00014230	KAL2902967.1	IQD14	Protein IQ-DOMAIN 14	1.57	0	0.77	undetected mature	AT1G01110
42	42	Bsv0100-00014397	XM_057393257.1	EPFL2	EPIDERMAL PATTERNING FACTOR-like protein 2	1.8	0	1.299	73.1727	AT4G37810
43	43	Bsv0100-00014957	KAL2906828.1	phg2	Serine/threonine-protein kinase phg2	1.3	0	1.2	31968	AT4G15140
44	44	Bsv0100-00015473	KAL2903452.1	TE1	TE1 Protein terminal ear1	8.22	0	3.049	4.23627	AT3G26120
45	45	Bsv0100-00014437	KAL2931714.1	WOX9	WUSCHEL-related homeobox 9	1.17	0	0.583	16.3964	AT2G33880	Transcriptional_control
46	46	Bsv0100-00016208	KAL2892086.1	At1g47790	F-box-like domain superfamily	0.91	0	0.621	11.1623	AT3G10240
47	47	Bsv0100-00015867	KAL2929158.1	MLP43	MLP-like protein 43	8.87	0	4.301	55.7618	At1g70890
48	48	Bsv0100-00015398	KAL2906335.1	CYCD3-1	Cyclin-D3-1	1.39	0	0.961	57.2219	AT4G34160
49	49	Bsv0100-00017092	KAL2895558.1	rplB	50S ribosomal protein L2	0.69	0	0.296	364.864		Chloroplast_biogenesis_import
50	50	Bsv0100-00016744	KAL2923676.1		Pret-051 Ankyrin repeat domain-containing protein A238L	0.86	0	0.464	37.7457	At5g51160
51	51	Bsv0100-00017455	KAL2940599.1	CPRD49	GDSL esterase/lipase CPRD49	1.13	0	0.72	undetected mature	AT3G11210	Phenylpropanoid_lignin_lipid_cuticle
52	52	Bsv0100-00018224	KAL2899684.1	AIL1	AP2-like ethylene-responsive transcription factor AIL1	2.15	0	0.977	34.0906	At1g72570
53	53	Bsv0100-00017494	KAL2927187.1	RSC1	Chromatin structure-remodeling complex subunit RSC1	0.64	0	0.346	undetected mature	AT3G15605
54	54	Bsv0100-00017604	KAL2920782.1	UGT74F2	UDP-glycosyltransferase 74F2	11.53	0	9.122	91.2457	At2g43820
55	55	Bsv0100-00017657	KAL2894797.1	TYDC5	Tyrosine/DOPA decarboxylase 5	1.26	0	0.795	undetected mature	At2g20340
56	56	Bsv0100-00018111	KAL2944320.1	SWEET5	Bidirectional sugar transporter SWEET5	0.86	0	0.487	26.0834	At4g10850	Metabolite_transport
57	57	Bsv0100-00018748	KAL2940758.1	PSY2	Phytoene synthase 2, chloroplastic	3.03	0	2.028	4.53695	AT5G17230	Chloroplast_biogenesis_import;Isoprenoid_mep_carotenoid
58	58	Bsv0100-00020061	KAL2933319.1	At5g03820	GDSL esterase/lipase At5g03820	8.95	0	4.727	120.04	AT5G03820	Phenylpropanoid_lignin_lipid_cuticle
59	59	Bsv0100-00018247	KAL2939371.1	WSD1	O-acyltransferase WSD1	0.88	0	1.186	3.83151	AT5G22490	Phenylpropanoid_lignin_lipid_cuticle
60	60	Bsv0100-00019155	XR_002509756.1	CLE25	CLAVATA3/ESR (CLE)-related protein 25	1.8	0	1.562	21.0702	AT3G28455
61	61	Bsv0100-00020584	KAL2929824.1	AIL1	AP2-like ethylene-responsive transcription factor AIL1	2.67	0	1.134	72.351	At1g72570
62	62	Bsv0100-00020549	KAL2936971.1	YLS9	Protein YLS9	3.33	0	1.709	undetected mature	AT2G41990
63	63	Bsv0100-00021540	KAL2942728.1	Arrdc2	Arrestin domain-containing protein 2	2.78	0	1.841	105.16	AT5G63660
64	64	Bsv0100-00020019	KAL2930249.1	FAR_SIMCH	Alcohol-forming fatty acyl-CoA reductase	11.36	0	6.872	18.7787	AT4G33790	Phenylpropanoid_lignin_lipid_cuticle
65	65	Bsv0100-00020020	KAL2930248.1	FAR3	Alcohol-forming fatty acyl-CoA reductase	4.12	0	2.457	21.7296	AT4g33790	Phenylpropanoid_lignin_lipid_cuticle
66	66	Bsv0100-00022186	KAL2902545.1	COL4	Zinc finger protein CONSTANS-LIKE 4	4.07	0	2.505	39.6129	At5g41380
67	67	Bsv0100-00021416	B_sinuspersici unique	LDOX	Leucoanthocyanidin dioxygenase	7.75	0	5.501	undetected mature	AT1G29270
68	68	Bsv0100-00021682	KAL2920976.1	FSTL_FLABI	Flavonol sulfotransferase-like	0.75	0	0.563	85.2668	AT3G45070
69	69	Bsv0100-00021511	KAL2904975.1	TCP12	Transcription factor TCP12	6.59	0	3.252	5.69443	At1g68800	Transcriptional_control
70	70	Bsv0100-00021839	KAL2924130.1		Conotoxin Bu2	9.41	0	7.805	229.157
71	71	Bsv0100-00052052	KAL2926013.1	MED37E	Probable mediator of RNA polymerase II transcription subunit 37e	5.22	0	2.447	60.7898	At5g02500
72	72	Bsv0100-00022620	KAL2934762.1	LSH6	Protein LIGHT-DEPENDENT SHORT HYPOCOTYLS 6	13.93	0	5.458	656.57	AT3G23290
73	73	Bsv0100-00022461	KAL2897980.1	IRK	Probable LRR receptor-like serine/threonine-protein kinase IRK	0.67	0	0.355	11.83	AT3G56370
74	74	Bsv0100-00022164	KAL2931567.1	rpsG	30S ribosomal protein S7	33.06	0	16.882	2.00805	At1g68260	Chloroplast_biogenesis_import
75	75	Bsv0100-00024425	KAL2906365.1	GH3.1	Probable indole-3-acetic acid-amido synthetase GH3.1	14.63	0	9.934	undetected mature	At2g23170	Chloroplast_biogenesis_import;Auxin_homeostasis
76	76	Bsv0100-00024426	KAL2906362.1	GH3.2	Indole-3-acetic acid-amido synthetase GH3.2	15.89	0	9.666	986.415	At5g54510	Chloroplast_biogenesis_import;Auxin_homeostasis
77	77	Bsv0100-00024754	KAL2935891.1	MATP6-A	Oleosin 5 At3g01570	1.28	0	0.691	undetected mature	AT3G01570
78	78	Bsv0100-00025152	KAL2896558.1	speA	Arginine decarboxylase	5.06	0	2.683	424.436
79	79	Bsv0100-00025089	KAL2931266.1	STM	H1 Homeobox protein SBH1	5.92	0	2.194	32.1386	At1g62360	Transcriptional_control
80	80	Bsv0100-00025066	KAL2932446.1	y06J	Uncharacterized 12.8 kDa protein in regB-denV intergenic region	32.14	0	16.639	15.2949
81	81	Bsv0100-00025468	KAL2932211.1	AS	Hydroquinone glucosyltransferase	1.09	0	0.515	5.21377	AT4G01070
82	82	Bsv0100-00026403	KAL2936350.1	VQ11	VQ motif-containing protein 1	0.72	0	0.308	53.5423	At1g80450
83	83	Bsv0100-00026876	KAL2939385.1	WSD1	O-acyltransferase WSD1	1.4	0	0.842	4.01627	At5g53390	Phenylpropanoid_lignin_lipid_cuticle
84	84	Bsv0100-00028399	KAL2927645.1	SOT17	Cytosolic sulfotransferase 17	18.07	0	14.738	5.07974	AT1G18590
85	85	Bsv0100-00027361	KAL2896095.1	AS	Hydroquinone glucosyltransferase	1.12	0	0.718	16.4435	AT4G01070
86	86	Bsv0100-00028428	KAL2942701.1	LSH6	Protein LIGHT-DEPENDENT SHORT HYPOCOTYLS 6	3.77	0	1.413	undetected mature	AT3G23290
87	87	Bsv0100-00026901	KAL2923070.1	acrB	Probable ubiquitination network signaling protein acrB	2.67	0	1.063	21.5853	AT4G13540
88	88	Bsv0100-00028023	KAL2904964.1	PER57	Peroxidase 57	0.75	0	0.63	3.60376	AT5G17820	Redox_ros_energy
89	89	Bsv0100-00029958	KAL2944207.1		Dynein light chain LC6, flagellar outer arm	1.51	0	1.03	8.39795	AT1G23220
90	90	Bsv0100-00028441	KAL2905739.1	VRN1	B3 domain-containing transcription factor VRN1	0.98	0	0.485	399.537	AT3G18960
91	91	Bsv0100-00028903	KAL2906926.1	cob	Cytochrome b	4.76	0	4.172	18.4921		Chloroplast_biogenesis_import
92	92	Bsv0100-00028292	B_sinuspersici unique	AIR1	Putative lipid-binding protein AIR1	86.11	0	71.976	695.424	At4g12520	Phenylpropanoid_lignin_lipid_cuticle
93	93	Bsv0100-00028623	B_sinuspersici unique	ccsA	Cytochrome c biogenesis protein CcsA	0.83	0	0.678	83.5102	AT4G16050	Chloroplast_biogenesis_import
94	94	Bsv0100-00028925	KAL2894732.1	KAN4	Probable transcription factor KAN4	1.63	0	1.082	18.7485	AT4G16050
95	95	Bsv0100-00029764	KAL2901872.1	hmu	Halomucin	0.76	0	0.413	undetected mature
96	96	Bsv0100-00029362	KAL2939795.1	GG3	Guanine nucleotide-binding protein subunit gamma 3	7.57	0	3.991	undetected mature
97	97	Bsv0100-00029033	KAL2902527.1	POU2F1	POU domain, class 2, transcription factor 1	4.76	0	3.473	undetected mature	AT4G23370
98	98	Bsv0100-00033139	KAL2898847.1	SDR	Tropinone reductase homolog At2g29360	0.85	0	0.719	15.8735	AT2G29360
99	99	Bsv0100-00030682	KAL2927347.1	NUDT20	Nudix hydrolase 20, chloroplastic	4.22	0	2.881	undetected mature	At5g19460	Chloroplast_biogenesis_import;Redox_ros_energy
100	100	Bsv0100-00030683	KAL2929281.1	NUDT20	Nudix hydrolase 20, chloroplastic	6.51	0	5.444	undetected mature	At5g19460	Chloroplast_biogenesis_import;Redox_ros_energy
101	101	Bsv0100-00031570	KAL2934236.1	SORL1	Sortilin-related receptor	1.16	0	0.613	965.518	AT5G01030
102	102	Bsv0100-00032598	KAL2941049.1	CUT1	3-ketoacyl-CoA synthase 6	26.72	0	12.158	undetected mature	At1g68530
103	103	Bsv0100-00032599	XM_006854869.3	KCS5	3-ketoacyl-CoA synthase 5	15.37	0	7.171	undetected mature	AT1G25450
104	104	Bsv0100-00032600	B_sinuspersici unique	CUT1	3-ketoacyl-CoA synthase 6	6.7	0	2.893	55.1562	AT1G68530
105	105	Bsv0100-00030414	KAL2941838.1	DYL1_HELCR	Retrovirus-related Pol polyprotein from transposon TNT 1-94	9.35	0	574	undetected mature	AT5G54270
106	106	Bsv0100-00030415	KAL2941899.1		Trypsin/subtilisin inhibitor	14.54	0	10.776	undetected mature	At5g43580
107	107	Bsv0100-00031272	KAL2903301.1	KNAT2	Homeobox protein knotted-1-like 2	2.95	0	1.137	undetected mature	AT5G25220	Transcriptional_control
108	108	Bsv0100-00030285	KAL2903243.1	XTH33	Probable xyloglucan endotransglucosylase/hydrolase protein 33	3.92	0	3	undetected mature	AT1G10550	Cell_wall_expansion
109	109	Bsv0100-00032016	KAL2944387.1	NAC098	Protein CUP-SHAPED COTYLEDON 2	0.7	0	0.264	2221.66	AT5G53950	Transcriptional_control
110	110	Bsv0100-00032777	KAL2896523.1	HMGB7	HMGB7 High mobility group B protein 7	0.8	0	0.502	58.1346	At5g05330
111	111	Bsv0100-00034895	KAL2907270.1	CYP96A15	Alkane hydroxylase MAH1	7.35	0	5.123	4.66926	AT4G39490
112	112	Bsv0100-00034093	KAL2928910.1	AIL5	AP2-like ethylene-responsive transcription factor AIL5	5.09	0	1.687	undetected mature	AT5G57390
113	113	Bsv0100-00034094	B_sinuspersici unique	AIL7	AP2-like ethylene-responsive transcription factor AIL7	2.37	0	1.027	3.43257	AT5G65510
114	114	Bsv0100-00038953	KAL2893440.1	COMT	Caffeic acid 3-O-methyltransferase	0.73	0	0.511	40.0905	AT5G54160	Phenylpropanoid_lignin_lipid_cuticle
115	115	Bsv0100-00034165	KAL2903807.1	GRXC3	Glutaredoxin-C3	3.11	0	1.091	1.89656	AT5G14070	Redox_ros_energy
116	116	Bsv0100-00034477	KAL2900397.1	Dedol-PP synthase 4	Dehydrodolichyl diphosphate synthase 4,At5g58782	4.27	0	2.246	FAIL	AT5G36890
117	117	Bsv0100-00034628	KAL2901693.1	EARLI1	Lipid transfer protein EARLI 1	6.81	0	2.251	undetected mature	AT1G62510	Phenylpropanoid_lignin_lipid_cuticle
118	118	Bsv0100-00034629	KAL2901692.1	EARLI1	Lipid transfer protein EARLI 1	5.81	0	1.656	undetected mature	AT1G62510	Phenylpropanoid_lignin_lipid_cuticle
119	119	Bsv0100-00036018	KAL2939399.1	WSD1	O-acyltransferase WSD1	5.57	0	3.435	26.5888	At5g53390	Phenylpropanoid_lignin_lipid_cuticle
120	120	Bsv0100-00035316	KAL2906009.1	UFC	Protein UPSTREAM OF FLC	2.07	0	0.835	33.9735	AT5G10150
121	121	Bsv0100-00037816	B_sinuspersici unique	PCDH11X	Protocadherin-11 X-linked	0.94	0	0.63	5.28353	AT3G14760	Chloroplast_biogenesis_import
122	122	Bsv0100-00036723	KAL2929755.1	PAP26	Bifunctional purple acid phosphatase 26	2.49	0	1.124	undetected mature	AT5G34850	Chloroplast_biogenesis_import
123	123	Bsv0100-00037880	KAL2930644.1	SOT5	Cytosolic sulfotransferase 5	1.54	0	1.167	undetected mature	At5g07010
124	124	Bsv0100-00039213	KAL2899694.1	GRF5	Growth-regulating factor 5	1.7	0	1.18	0.0383999	AT3G13960
125	125	Bsv0100-00037607	KAL2896684.1	SCPL17	Serine carboxypeptidase-like 17	1.66	0	1.695	376.412	At2g22970	Phenylpropanoid_lignin_lipid_cuticle
126	126	Bsv0100-00038184	KAL2929980.1	CCoAOMT	Caffeoyl-CoA O-methyltransferase	2.55	0	1.343	33.4079	At4g26220	Phenylpropanoid_lignin_lipid_cuticle
127	127	Bsv0100-00038185	KAL2929980.1	CCoAOMT	Caffeoyl-CoA O-methyltransferase	6.08	0	4.113	22.0524	At1g67990	Phenylpropanoid_lignin_lipid_cuticle
128	128	Bsv0100-00040026	KAL2939890.1	dxs	1-deoxy-D-xylulose-5-phosphate synthase	0.74	0	0.798	21.355		Isoprenoid_mep_carotenoid
129	129	Bsv0100-00040458	KAL2939381.1	WSD1	O-acyltransferaseWSD1	1.96	0	1.253	undetected mature	At5g53390	Phenylpropanoid_lignin_lipid_cuticle
130	130	Bsv0100-00040644	KAL2932387.1		Allergen Act d 3	6.98	0	4.646	FAIL	At1g80240
131	131	Bsv0100-00042397	KAL2893679.1	GDL14_ARATH	GDSL esterase/lipase, At1g29670	0.62	0	0.392	4.2838	AT1G29660	Phenylpropanoid_lignin_lipid_cuticle
132	132	Bsv0100-00043939	KAL2924721.1	OMT1	Caffeic acid 3-O-methyltransferase	0.69	0	0.427	undetected mature	AT5G54160	Phenylpropanoid_lignin_lipid_cuticle;Metabolite_transport
133	133	Bsv0100-00043115	KAL2901601.1	PFC0810c	Uncharacterized protein PFC0810c	1.05	0	0.678	22.0578
134	134	Bsv0100-00044831	KAL2928088.1	AHP6	Histidine-containing phosphotransfer protein 6	1.15	0	0.755	7.2227	AT1G80100
135	135	Bsv0100-00045196	KAL2929576.1	SHN3	Ethylene-responsive transcription factor SHINE 3	5.1	0	4.726	13.0807	At5g25390
136	136	Bsv0100-00045335	KAL2928539.1		Organ-specific protein S2	2.87	0	2.663	undetected mature	AT1G49310
137	137	Bsv0100-00053407	KAL2937052.1	BHLH	Basic helix-loop-helix protein A	0.66	0	0.368	27.2378	AT4G09820
138	138	Bsv0100-00045370	KAL2925650.1	HSP17.9-D	HSP17.9-D 17.9 kDa class II heat shock protein	0.92	0	0.391	undetected mature	AT5G12020	Chloroplast_biogenesis_import
139	139	Bsv0100-00047218	KAL2924190.1	CYP77A3	Cytochrome P450 77A3	0.75	0	0.224	1124.64	AT1G11600	Chloroplast_biogenesis_import;Redox_ros_energy
140	140	Bsv0100-00047175	KAL2926374.1	SILD_FORIN	Secoisolariciresinol dehydrogenase	3.63	0	2.645	undetected mature	At1g52340
141	141	Bsv0100-00046713	KAL2906068.1	MYB39	TranscriptionfactorMYB39	2.64	0	1.857	2.61266	AT5G10280	Transcriptional_control
142	142	Bsv0100-00047155	KAL2939397.1	WSD1	O-acyltransferase WSD1	7.66	0	4.074	undetected mature	At1g72110	Phenylpropanoid_lignin_lipid_cuticle
143	143	Bsv0100-00046996	KAL2932211.1	AS	Hydroquinone glucosyltransferase	0.96	0	0.452	undetected mature	AT4G01070
144	144	Bsv0100-00048321	KAL2931243.1	GDL71_ARATH	GDSL esterase/lipase At5g03610	1.32	0	0.729	undetected mature	AT5G03610	Phenylpropanoid_lignin_lipid_cuticle
145	145	Bsv0100-00048167	KAL2924020.1		Conotoxin Bu2	3.89	0	3.045	47.3925
146	146	Bsv0100-00048492	KAL2927075.1	GRDP1	Glycine-rich domain-containing protein 1	1.35	0	0.727	undetected mature	AT2G22660
147	147	Bsv0100-00048651	KAL2931464.1	CYP77A3	Cytochrome P450 77A3	0.74	0	0.214	3.59777	AT1G11600	Chloroplast_biogenesis_import;Redox_ros_energy
148	148	Bsv0100-00048722	KAL2927020.1		ago F-box/WD repeat-containing protein 7	1.23	0	0.802	7.00761	AT3G50390
149	149	Bsv0100-00049137	KAL2901682.1	EARLI1	Lipid transfer protein EARLI 1	5.8	0	1.953	undetected mature	AT2G45180	Phenylpropanoid_lignin_lipid_cuticle
150	150	Bsv0100-00050453	KAL2893679.1	GDL28_ARATH	GDSL esterase/lipase, At1g71250	2.41	0	1.605	9.95858	AT1G71250	Phenylpropanoid_lignin_lipid_cuticle
151	151	Bsv0100-00050550	KAL2897023.1	GDU4	Protein GLUTAMINE DUMPER 4	2.71	0	1.229	39.1556	AT5G38770
152	152	Bsv0100-00050605	KAL2944369.1	NAC098	Protein CUP-SHAPED COTYLEDON 2	0.75	0	0.266	14.6617	AT5G53950	Transcriptional_control
153	153	Bsv0100-00050754	KAL2926471.1		hemH Ferrochelatase	6.28	0	3.035	162.037
154	154	Bsv0100-00050768	KAL2902527.1	YIF1B	Protein YIF1B	0.72	0	0.522	undetected mature	AT4G23365
155	155	Bsv0100-00050947	KAL2926425.1	Os07g0190000	Probable 1-deoxy-D-xylulose-5-phosphate synthase 2, chloroplastic	2.2	0	1.427	1317.25	AT4G15560	Chloroplast_biogenesis_import;Isoprenoid_mep_carotenoid
156	156	Bsv0100-00051528	KAL2921859.1	FBK50_ARATH	F-box/kelch-repeat protein At3g06240	1.39	0	0.859	98.5077	At3g06240
157	157	Bsv0100-00051858	KAL2893917.1	CEL3	Endoglucanase 9	0.73	0	0.452	2.42116	At1g71380	Cell_wall_expansion
158	158	Bsv0100-00052630	KAL2925771.1	SILD_FORIN	Secoisolariciresinol dehydrogenase	2.3	0	1.55	undetected mature	At1g52340
159	159	Bsv0100-00052691	KAL2925755.1	TP_0941	Uncharacterized protein TP_0941	0.65	0	0.396	10.9135	AT2G46100
160	160	Bsv0100-00053610	KAL2906067.1	MYB39	Transcription factor MYB39	2.49	0	2.209	2.07638	AT1G34670	Transcriptional_control
161	161	Bsv0100-00053676	KAL2925313.1	IQD14	Protein IQ-DOMAIN 14	0.64	0	0.372	undetected mature	AT3G16490
162	162	Bsv0100-00053769	KAL2897023.1	GDU4	Protein GLUTAMINE DUMPER 4	4.1	0	1.823	336.965	AT5G38770
163	163	Bsv0100-00054067	KAL2925062.1	PDF2.5	Defensin-like protein 6	2.44	0	1.706	7.88891	AT5G63660
164	164	Bsv0100-00054343	KAL2924898.1	NRPE5C	DNA-directed RNA polymerase V subunit 5C	5.22	0	3.371	270.609	AT3G54490
165	165	Bsv0100-00054721	KAL2896342.1	ABCG6	ABC transporter G family member 6	0.77	0	0.492	undetected mature	AT2G39350	Metabolite_transport
166	166	Bsv0100-00054989	XM_021882478.1	POLAR	Protein POLAR LOCALIZATION DURING ASYMMETRIC DIVISION AND REDISTRIBUTION	2.76	0	1.358	14.7462
167	167	Bsv0100-00055108	KAL2924400.1	GRF5	Growth-regulating factor 5	0.82	0	0.511	2.76117	AT3G13960
168	168	Bsv0100-00003176	no blast		GD16684 Bifunctional lysine-specific demethylase and histidyl-hydroxylase NO66	0.78	0	0.455	FAIL	AT5G07500
169	169	Bsv0100-00018642	KAL2927834.1		RNA-dependent RNA polymerase	4.18	0	2.431	45.731
170	170	Bsv0100-00029463	KAL2929908.1	CBP1	Serine carboxypeptidase 1	2.51	0	1.872	undetected mature	At5g36180
171	171	Bsv0100-00040075	XM_056841263.1	lpxK	Tetraacyldisaccharide 4'-kinase	0.62	0	0.384	undetected mature
172	172	Bsv0100-00020760	XM_01689642.4	EPF1	Protein EPIDERMAL PATTERNING FACTOR 1	3.46	0	2.935	96.0711	AT2G20875
173	173	Bsv0100-00035627	KAL2923661.1	AtPP2C64	Probable protein phosphatase 2C 64, At4g38520	1.12	0	0.615	30.3711	At5g66080
174	174	Bsv0100-00025048	KAL2901688.1	14KD_DAUCA	14 kDa proline-rich protein DC2.15	0.84	0	0.453	102.908	At4g12520	Cell_wall_expansion
175	175	Bsv0100-00054417	No blast	stt3	Dolichyl-diphosphooligosaccharide--protein glycosyltransferase subunit stt3	1.05	0	0.608	65.5188
176	176	Bsv0100-00045264	KAL2925601.1	CLU	Clusterin	3.39	0	2.749	undetected mature
177	177	Bsv0100-00006302	KAL2895407.1	GDL56_ARATH	GDSL esterase/lipase At3g43570	7.82	0	12.59	undetected mature	At5g42170	Phenylpropanoid_lignin_lipid_cuticle
178	178	Bsv0100-00040459	KAL2939382.1	pcaR	Pca regulon regulatory protein	2.55	0	1.371	37.3586	AT3G49210
179	179	Bsv0100-00021441	KAL2940019.1	RGA1	Putative disease resistance protein RGA1	0.73	0	0.456	131.796
180	180	Bsv0100-00050958	KAL2902805.1	SLC6A9	Sodium- and chloride-dependent glycine transporter 1	0.89	0	0.481	8975.02	AT4G23930	Metabolite_transport
181	181	Bsv0100-00028632	B_sinuspersici unique	M810_ARATH	Uncharacterized mitochondrial protein AtMg00810	1.24	0	0.713	undetected mature	AT5G16860	Chloroplast_biogenesis_import
182	182	Bsv0100-00021915	KAL2903420.1	gatB	Aspartyl/glutamyl-tRNA(Asn/Gln) amidotransferase subunit B	1.22	0	0.726	2030.47
183	183	Bsv0100-00024968	KAL2941298.1	CYCB1-4	CYCB1-4 Cyclin-B1-4	1.21	0	0.605	396.176	AT2G26760
184	184	Bsv0100-00017660	KAL2894799.1	TYDC2	Tyrosine/DOPA decarboxylase 2	1.13	0	0.595	1656.26	At2g20340
185	185	Bsv0100-00001213	KAL2921567.1	PSOMT1	(R,S)-reticuline7-O-methyltransferase	0.81	0	0.393	228.675	AT1G63140	Chloroplast_biogenesis_import;Metabolite_transport
186	186	Bsv0100-00024300	KAL2892388.1	ZPR2	Protein LITTLE ZIPPER 2	2.23	0	1.711	86.2611	At2g45450
187	187	Bsv0100-00030293	KAL2902514.1	roco11	Probable serine/threonine-protein kinase roco11	0.99	0	0.414	26.1216
188	188	Bsv0100-00006329	KAL2895206.1		tig Trigger factor	1.26	0	1.318	undetected mature
189	189	Bsv0100-00023783	No blast	BAS	Beta-amyrin synthase	0.67	0	0.407	undetected mature
190	190	Bsv0100-00018914	KAL2942853.1	MIB2	E3 ubiquitin-protein ligase MIB2	0.76	0	0.281	387.012	At2g45730
191	191	Bsv0100-00040236	KAL2939977.1	FKBP8	Peptidyl-prolyl cis-trans isomerase FKBP8	0.63	0	0.819	19.9003	AT3G16760
192	192	Bsv0100-00032265	no blast	At2g19130	G-type lectin S-receptor-like serine/threonine-protein kinase	1.05	0	0.405	2.45692
193	193	Bsv0100-00001620	no blast		Structural polyprotein	1.37	0	1.003	223.578	AT4G28460
194	194	Bsv0100-00044126	KAL2902021.1	NDUB7_ARATH	NADH dehydrogenase [ubiquinone] 1 beta subcomplex subunit 7, At2g02050	1.17	0	0.964	858.549
195	195	Bsv0100-00045885	KAL2944568.1		NADH-ubiquinone oxidoreductase chain 5	9.1	0	6.993	123.955		Redox_ros_energy
196	196	Bsv0100-00038494	KAL2897821.1	DBP8	ATP-dependent RNA helicase DBP8	1.82	0	1.134	53.6195
197	197	Bsv0100-00013965	KAL2935516.1	CLE13	CLAVATA3/ESR (CLE)-related protein 13	5.62	0	5.27	29.7023	AT1G73965
198	198	Bsv0100-00053734	KAL2927135.1	MCYG_01475	Metallocarboxypeptidase A-like protein MCYG_01475	0.78	0	0.711	123.766	AT1G71350
199	199	Bsv0100-00024000	XM_021910666.1	AAT1	Acetyl-CoA acetyltransferase, cytosolic 1	1.56	0	0.722	295.314	AT5G48230
