# Supplementary material
Source: Research Square preprint supplement (doi:10.21203/rs.3.rs-8983924/v1)
Supplement: Supplementary file 6 [file eaf8a8c13a61289b5af55a88.xlsx]

## Sheet: Table S2
No.	Bs_Genes	GeneName	Desc	Num_of_Samples	EXP:Young_1:FPKM	EXP:Young_2:FPKM	EXP:Young_3:FPKM	EXP:Inter_1:FPKM	EXP:Inter_2:FPKM	EXP:Inter_3:FPKM	EXP:Mature_1:FPKM	EXP:Mature_2:FPKM	EXP:Mature_3:FPKM
1	Bsv0100-00000031	GLIP4	GDSL esterase/lipase 4 [Source:SWISS;Acc:Q9LJP1]	9	0.571169	0.471711	1.68085	0.0790201	0.114459	0.186008	0	0	0
2	Bsv0100-00000361	NAC031	Protein CUP-SHAPED COTYLEDON 3 [Source:SWISS;Acc:Q9S851]	9	2.30765	2.36	3.5476	0.389976	0.422787	0.0631644	0	0	0
3	Bsv0100-00000950	SOT15	Cytosolic sulfotransferase 15 [Source:SWISS;Acc:Q8L5A7]	9	25.6096	22.2399	43.4643	11.8136	9.12113	15.6123	0	0	0
4	Bsv0100-00001213	Q6WUC2_PAPSO	None [Source:SWISS;Acc:Q6WUC2]	9	1.15959	1.09597	0.861404	0	0.418506	0	0	0	0
5	Bsv0100-00001620	-	-	9	1.06167	3.0566	2.43726	1.28332	1.18424	0	0	0	0
6	Bsv0100-00001666	Cht9	Chitinase 9 [Source:SWISS;Acc:Q688M5]	9	1.5178	1.78394	3.56607	0.139426	0.0441162	0.269083	0	0	0
7	Bsv0100-00001675	REM9	B3 domain-containing protein REM9 [Source:SWISS;Acc:O81778]	9	1.20065	0.786145	1.27432	0.694231	0.298018	0.175615	0	0	0
8	Bsv0100-00001955	-	-	9	5.19755	5.83877	5.5217	7.15674	6.99191	4.17385	0	0	0
9	Bsv0100-00002448	WTR8_ARATH	WAT1-related protein At1g44800 [Source:SWISS;Acc:Q9LPF1]	9	1.9845	1.99782	3.05313	0	0	0.0583181	0	0	0
10	Bsv0100-00003093	-	-	9	2.84514	2.50988	2.12709	1.37455	1.11276	0.362779	0	0	0
11	Bsv0100-00003176	PEI1	Zinc finger CCCH domain-containing protein 54 [Source:SWISS;Acc:O65036]	9	0.940832	1.55467	0.376876	0.40542	0.582451	0.235146	0	0	0
12	Bsv0100-00003703	AAE6	Probable acyl-activating enzyme 6 [Source:SWISS;Acc:Q9FFE9]	9	2.3763	2.27519	3.42841	0.652176	0.572648	0.739839	0	0	0
13	Bsv0100-00003862	F14O23.4	GDSL esterase/lipase At1g71691 [Source:SWISS;Acc:Q9SF78]	9	5.71112	6.20436	10.2084	0.780824	0.791741	0.841082	0	0	0
14	Bsv0100-00003864	GDL17_ARATH	GDSL esterase/lipase At1g33811 [Source:SWISS;Acc:Q8L5Z1]	9	6.64662	9.63543	2.59631	8.08979	8.01103	1.71859	0	0	0
15	Bsv0100-00004168	DIR23	Dirigent protein 23 [Source:SWISS;Acc:Q84TH6]	9	0.808372	1.64703	0.291989	0.746677	0.286106	0	0	0	0
16	Bsv0100-00004814	COMT	Caffeic acid 3-O-methyltransferase [Source:SWISS;Acc:P28002]	9	2.07441	1.80404	3.7817	0.283809	0.216727	0.844968	0	0	0
17	Bsv0100-00004828	Q6AVI0_ORYSJ	None [Source:SWISS;Acc:Q6AVI0]	9	1.39783	1.19763	2.17034	0.372186	0.356791	0.106275	0	0	0
18	Bsv0100-00006562	PME68	Probable pectinesterase 68 [Source:SWISS;Acc:Q8LPF3]	9	19.104	18.206	29.1482	9.13327	9.72992	6.15372	0	0	0
19	Bsv0100-00006321	KCS17	3-ketoacyl-CoA synthase 17 [Source:SWISS;Acc:Q5XEP9]	9	1.28122	1.25873	1.36873	0.218194	0.16779	0	0	0	0
20	Bsv0100-00006329	-	-	9	1.2367	2.31978	0.713788	2.23101	2.05647	3.30818	0	0	0
21	Bsv0100-00006112	MYB3	Transcription factor MYB3 [Source:SWISS;Acc:Q9S9K9]	9	0.77761	0.830601	0.997362	0.219379	0	0	0	0	0
22	Bsv0100-00006302	GDL56_ARATH	GDSL esterase/lipase At3g43570 [Source:SWISS;Acc:Q9FYD3]	9	11.4083	14.7742	13.7936	45.0007	17.8917	10.4434	0	0	0
23	Bsv0100-00007162	sconB	Probable E3 ubiquitin ligase complex SCF subunit sconB [Source:SWISS;Acc:C5FP68]	9	2.38429	1.46359	1.05019	0.488959	1.19778	0.582595	0	0	0
24	Bsv0100-00007186	MLP31	MLP-like protein 31 [Source:SWISS;Acc:Q941R6]	9	5.08222	3.23725	5.53561	0.308218	0	0.353673	0	0	0
25	Bsv0100-00007879	-	-	9	2.19156	1.41911	0.212542	0.455238	0.820587	0.507441	0	0	0
26	Bsv0100-00008407	AS	Hydroquinone glucosyltransferase [Source:SWISS;Acc:Q9AR73]	9	1.48428	1.14153	1.22828	0.99989	0.561993	0.574243	0	0	0
27	Bsv0100-00008028	-	-	9	13.0599	9.56543	19.9466	1.87759	4.10913	1.05881	0	0	0
28	Bsv0100-00008718	-	-	9	6.69203	5.28807	8.0085	2.78363	2.83192	1.11362	0	0	0
29	Bsv0100-00009857	-	-	9	1701.86	1760.95	1878.51	412.036	482.242	231.734	0	0	0
30	Bsv0100-00010308	Y2124_NOSS1	Uncharacterized WD repeat-containing protein all2124 [Source:SWISS;Acc:Q8YV57]	9	2.10236	2.1313	1.12978	0.909735	1.02541	0.400355	0	0	0
31	Bsv0100-00010677	MYB108	Transcription factor MYB108 [Source:SWISS;Acc:Q9LDE1]	9	1.04427	0.999118	0.432133	0.439073	0.498672	0.496287	0	0	0
32	Bsv0100-00010905	NAC021	NAC domain-containing protein 21/22 [Source:SWISS;Acc:Q84TE6]	9	5.25043	6.61867	3.58585	3.96615	3.88658	1.13323	0	0	0
33	Bsv0100-00010906	-	-	9	10.8608	13.7443	5.89702	5.23959	5.33888	3.90405	0	0	0
34	Bsv0100-00010454	-	-	9	1.68938	1.74448	2.65864	0.54023	0.408839	0.122671	0	0	0
35	Bsv0100-00010562	rps4	30S ribosomal protein S4, chloroplastic [Source:SWISS;Acc:P13788]	9	0.755913	1.69836	1.12131	0.285572	0.819465	0.970899	0	0	0
36	Bsv0100-00010800	ATHB-4	Homeobox-leucine zipper protein ATHB-4 [Source:SWISS;Acc:P92953]	9	3.2719	3.35178	1.59324	1.38121	1.42667	0.386484	0	0	0
37	Bsv0100-00010483	GAPCP1	Glyceraldehyde 3-phosphate dehydrogenase GAPCP1, chloroplastic [Source:SWISS;Acc:Q9SAJ6]	9	0	8.23992	0	7.20935	0	0	0	0	0
38	Bsv0100-00011912	-	-	9	1.20282	0.841087	0.777653	0.361802	0.616098	0.0827978	0	0	0
39	Bsv0100-00011777	-	-	9	1.40798	1.34477	0.763347	0.801589	0.50388	0.305011	0	0	0
40	Bsv0100-00011959	EPFL4	EPIDERMAL PATTERNING FACTOR-like protein 4 [Source:SWISS;Acc:Q2V3I3]	9	5.71474	1.76953	5.33308	0	0.51762	0	0	0	0
41	Bsv0100-00012052	dl4155w	GDSL esterase/lipase At4g16230 [Source:SWISS;Acc:O23470]	9	29.9235	31.355	38.3888	25.9983	24.6622	26.2557	0	0	0
42	Bsv0100-00012295	GSTU9	Glutathione S-transferase U9 [Source:SWISS;Acc:Q9FUT0]	9	1.01494	1.36853	0.228022	0.823765	0.335005	0.132711	0	0	0
43	Bsv0100-00013033	WSD1	O-acyltransferase WSD1 [Source:SWISS;Acc:Q93ZR6]	9	27.9121	28.3044	16.8227	19.626	19.5753	12.4556	0	0	0
44	Bsv0100-00013886	SALAT	Salutaridinol 7-O-acetyltransferase [Source:SWISS;Acc:Q94FT4]	9	1.27616	0.840477	0.31193	0.370451	0.250216	0.0589061	0	0	0
45	Bsv0100-00013965	CLE13	CLAVATA3/ESR (CLE)-related protein 13 [Source:SWISS;Acc:Q6NMF0]	9	11.2494	7.17464	4.53029	14.7248	4.45692	5.29713	0	0	0
46	Bsv0100-00013994	Q9FZ86_ARATH	None [Source:SWISS;Acc:Q9FZ86]	9	0.81637	2.52848	1.46022	0.304817	1.72752	0.35234	0	0	0
47	Bsv0100-00014230	-	-	9	0.978696	1.39654	3.16925	0.39616	0.469171	0.523647	0	0	0
48	Bsv0100-00014397	EPFL2	EPIDERMAL PATTERNING FACTOR-like protein 2 [Source:SWISS;Acc:Q9T068]	9	2.90732	2.70368	4.93184	0	0.864805	0.282402	0	0	0
49	Bsv0100-00014957	-	-	9	2.09138	3.03357	2.51815	2.03373	0.872515	0.253152	0	0	0
50	Bsv0100-00015473	TE1	Protein terminal ear1 [Source:SWISS;Acc:O65001]	9	5.20839	5.56356	13.9074	0.854853	1.08414	0.822449	0	0	0
51	Bsv0100-00014437	WOX9	WUSCHEL-related homeobox 9 [Source:SWISS;Acc:Q6X7J4]	9	1.18317	0.822277	2.40881	0.102926	0.489964	0.235672	0	0	0
52	Bsv0100-00016208	-	-	9	1.47426	1.18596	1.31733	0.713965	0.407994	0.493643	0	0	0
53	Bsv0100-00015867	MLP43	MLP-like protein 43 [Source:SWISS;Acc:Q9SSK5]	9	10.4526	10.0512	17.7456	0.0886397	0.167287	0.202671	0	0	0
54	Bsv0100-00015398	CYCD3-1	Cyclin-D3-1 [Source:SWISS;Acc:P42753]	9	2.30995	2.36147	1.94154	0.944559	0.730175	0.359214	0	0	0
55	Bsv0100-00017092	-	-	9	0.913647	0.730471	0.588882	0.146017	0.280958	0	0	0	0
56	Bsv0100-00016744	-	-	9	1.20744	1.17418	0.795682	0.808126	0.190797	0	0	0	0
57	Bsv0100-00017455	CPRD49	GDSL esterase/lipase CPRD49 [Source:SWISS;Acc:Q9SRM5]	9	1.52886	1.21366	1.56765	0.837588	0.749325	0.582292	0	0	0
58	Bsv0100-00018224	AIL1	AP2-like ethylene-responsive transcription factor AIL1 [Source:SWISS;Acc:Q1PFE1]	9	1.59939	1.68901	3.30619	0.617963	0.615355	0.968718	0	0	0
59	Bsv0100-00017494	-	-	9	0.650453	0.654932	1.34946	0.260916	0.0714505	0.128145	0	0	0
60	Bsv0100-00018642	-	-	9	7.84487	4.82787	1.88839	4.08635	0.941401	2.29204	0	0	0
61	Bsv0100-00017604	UGT74F2	UDP-glycosyltransferase 74F2 [Source:SWISS;Acc:O22822]	9	20.8573	20.8129	8.80673	12.3192	13.9802	5.32594	0	0	0
62	Bsv0100-00017657	TYDC5	Tyrosine/DOPA decarboxylase 5 [Source:SWISS;Acc:P54771]	9	1.46782	2.35783	1.13874	1.25295	0.691909	0.24165	0	0	0
63	Bsv0100-00017660	TYDC2	Tyrosine/DOPA decarboxylase 2 [Source:SWISS;Acc:P54769]	9	2.30128	1.08833	1.32704	0	0.636891	0	0	0	0
64	Bsv0100-00018111	SWEET5	Bidirectional sugar transporter SWEET5 [Source:SWISS;Acc:Q9FM10]	9	0.877169	0.987796	1.99895	0.169834	0.159477	0.191196	0	0	0
65	Bsv0100-00018748	PSY2	Phytoene synthase 2, chloroplastic [Source:SWISS;Acc:P37273]	9	4.33068	4.19181	2.86715	2.5715	2.13163	2.15616	0	0	0
66	Bsv0100-00018914	-	-	9	0.39549	0.376566	1.75909	0	0	0	0	0	0
67	Bsv0100-00020061	F8F6.30	GDSL esterase/lipase At5g03820 [Source:SWISS;Acc:Q9LZC5]	9	10.7042	13.5936	10.2043	3.28023	2.37422	2.38593	0	0	0
68	Bsv0100-00018247	-	-	9	1.69026	1.4269	1.65511	1.70476	1.34379	2.85546	0	0	0
69	Bsv0100-00019155	CLE25	CLAVATA3/ESR (CLE)-related protein 25 [Source:SWISS;Acc:Q8LFL4]	9	2.50148	2.43539	4.31461	0	0.700128	4.109	0	0	0
70	Bsv0100-00020584	AIL1	AP2-like ethylene-responsive transcription factor AIL1 [Source:SWISS;Acc:Q1PFE1]	9	1.99107	2.04742	3.83566	0.988199	0.749429	0.591981	0	0	0
71	Bsv0100-00020549	-	-	9	2.87222	3.39433	6.6836	0.839646	1.16495	0.427721	0	0	0
72	Bsv0100-00021540	DEF_PETIN	Defensin-like protein [Source:SWISS;Acc:Q40901]	9	3.197	3.06894	7.53839	0.772522	1.24808	0.745308	0	0	0
73	Bsv0100-00020760	EPF1	Protein EPIDERMAL PATTERNING FACTOR 1 [Source:SWISS;Acc:Q8S8I4]	9	2.88	6.11981	2.10316	4.46838	8.26438	2.57791	0	0	0
74	Bsv0100-00021441	-	-	9	1.23926	0.298038	1.44889	0.361255	0.345646	0.411146	0	0	0
75	Bsv0100-00020019	FAR_SIMCH	Alcohol-forming fatty acyl-CoA reductase [Source:SWISS;Acc:Q9XGY7]	9	14.1777	16.4111	15.8797	6.15731	4.47016	4.75277	0	0	0
76	Bsv0100-00020020	FAR3	Fatty acyl-CoA reductase 3 [Source:SWISS;Acc:Q93ZB9]	9	4.9828	6.02084	6.08791	1.97437	1.59951	1.44603	0	0	0
77	Bsv0100-00022186	-	-	9	5.22124	5.38612	6.55547	1.8455	2.20536	1.32798	0	0	0
78	Bsv0100-00021416	-	-	9	8.77696	12.5178	17.055	2.75454	3.50358	4.89716	0	0	0
79	Bsv0100-00021682	FSTL_FLABI	Flavonol sulfotransferase-like [Source:SWISS;Acc:P52838]	9	1.08416	0.982094	0.961013	0.315972	1.2809	0.445398	0	0	0
80	Bsv0100-00021511	TCP12	Transcription factor TCP12 [Source:SWISS;Acc:A0AQW4]	9	7.75362	8.76108	4.88108	1.54871	1.40892	4.91713	0	0	0
81	Bsv0100-00021915	-	-	9	2.58319	1.47909	0.58938	0.62196	0.577069	0.679588	0	0	0
82	Bsv0100-00021839	-	-	9	12.6278	12.9213	9.78004	13.7363	16.9978	4.1829	0	0	0
83	Bsv0100-00052052	MED37E	Probable mediator of RNA polymerase II transcription subunit 37e [Source:SWISS;Acc:P22953]	9	5.43966	4.52364	6.04955	0.640655	1.77631	3.59158	0	0	0
84	Bsv0100-00022620	Q9LW68_ARATH	None [Source:SWISS;Acc:Q9LW68]	9	10.249	11.973	24.4544	1.15028	0.489305	0.802774	0	0	0
85	Bsv0100-00022461	Y3804_ARATH	Probably inactive leucine-rich repeat receptor-like protein kinase At3g28040 [Source:SWISS;Acc:Q9LRT1]	9	0.457337	1.16845	0.88697	0.17857	0.508125	0	0	0	0
86	Bsv0100-00022164	-	-	9	34.328	37.8575	50.1168	11.5426	6.26642	11.824	0	0	0
87	Bsv0100-00025048	14KD_DAUCA	14 kDa proline-rich protein DC2.15 [Source:SWISS;Acc:P14009]	9	1.12174	1.05814	0.937895	0	0.599331	0.361267	0	0	0
88	Bsv0100-00023783	-	-	9	1.06949	1.01855	0.395143	0.407907	0.770203	0	0	0	0
89	Bsv0100-00024000	AAT1	Acetyl-CoA acetyltransferase, cytosolic 1 [Source:SWISS;Acc:Q8S4Y1]	9	2.14572	0	3.52515	1.27424	0	0	0	0	0
90	Bsv0100-00024968	CYCB1-4	Cyclin-B1-4 [Source:SWISS;Acc:O48790]	9	1.57272	1.48324	1.77546	0.613147	0	0	0	0	0
91	Bsv0100-00024300	-	-	9	2.18867	0	6.44273	1.35381	2.46779	2.94866	0	0	0
92	Bsv0100-00024425	GH3.1	Probable indole-3-acetic acid-amido synthetase GH3.1 [Source:SWISS;Acc:O82333]	9	20.0697	21.0416	8.76237	16.8962	16.6903	5.94297	0	0	0
93	Bsv0100-00024426	GH3.2	Indole-3-acetic acid-amido synthetase GH3.2 [Source:SWISS;Acc:Q9SZT9]	9	15.2242	19.8811	14.394	13.3849	18.3018	5.80859	0	0	0
94	Bsv0100-00024754	MATP6-A	Oleosin 18.2 kDa [Source:SWISS;Acc:P29527]	9	2.96766	1.44681	0.880988	0	0.417029	0.51007	0	0	0
95	Bsv0100-00025152	speA	Arginine decarboxylase [Source:SWISS;Acc:P21885]	9	5.90647	5.0104	9.01345	1.71823	1.43074	1.07083	0	0	0
96	Bsv0100-00025089	STM	Homeobox protein SHOOT MERISTEMLESS [Source:SWISS;Acc:Q38874]	9	4.45337	5.21062	9.19622	0.162161	0.415008	0.310317	0	0	0
97	Bsv0100-00025066	-	-	9	48.5916	40.6649	39.0474	11.6017	4.62783	5.21831	0	0	0
98	Bsv0100-00025468	AS	Hydroquinone glucosyltransferase [Source:SWISS;Acc:Q9AR73]	9	1.53476	1.37415	1.19927	0.23938	0.228577	0.0552435	0	0	0
99	Bsv0100-00026403	-	-	9	0.94933	1.07418	0.317927	0.328705	0.101589	0	0	0	0
100	Bsv0100-00026876	WSD1	O-acyltransferase WSD1 [Source:SWISS;Acc:Q93ZR6]	9	1.91526	1.46434	3.14389	0.316956	0.253567	0.484434	0	0	0
101	Bsv0100-00028399	SOT17	Cytosolic sulfotransferase 17 [Source:SWISS;Acc:Q9FZ80]	9	35.4831	35.2394	15.7383	19.6473	18.6807	7.85499	0	0	0
102	Bsv0100-00027361	AS	Hydroquinone glucosyltransferase [Source:SWISS;Acc:Q9AR73]	9	1.57516	1.26403	1.23615	0.548542	1.00052	0.841059	0	0	0
103	Bsv0100-00028428	Q9LW68_ARATH	None [Source:SWISS;Acc:Q9LW68]	9	2.18658	1.90735	5.82002	0.174375	0	0.195823	0	0	0
104	Bsv0100-00026901	-	-	9	1.77372	2.07449	3.50904	0.715409	0.956579	0.537803	0	0	0
105	Bsv0100-00028023	PER57	Peroxidase 57 [Source:SWISS;Acc:Q43729]	9	1.01228	0.5562	1.46203	1.15971	1.10312	0.378449	0	0	0
106	Bsv0100-00029958	DYL1_HELCR	Dynein light chain LC6, flagellar outer arm [Source:SWISS;Acc:O02414]	9	2.79881	2.65591	2.42223	0.555265	0.529386	0.308621	0	0	0
107	Bsv0100-00028441	Os03g0621600	Putative B3 domain-containing protein Os03g0621600 [Source:SWISS;Acc:Q851V5]	9	1.19305	1.50688	1.46637	0	0.199409	0	0	0	0
108	Bsv0100-00028903	-	-	9	7.31804	7.52633	4.74124	3.75313	8.70969	5.49633	0	0	0
109	Bsv0100-00028292	Q9S7I2_ARATH	None [Source:SWISS;Acc:Q9S7I2]	9	131.368	164.824	50.0083	130.312	122.414	48.8598	0	0	0
110	Bsv0100-00028623	-	-	9	1.20318	1.15262	0.779771	0.397414	1.8919	0.675237	0	0	0
111	Bsv0100-00028632	M810_ARATH	Uncharacterized mitochondrial protein AtMg00810 [Source:SWISS;Acc:P92519]	9	1.49646	0.932467	2.2661	1.17574	0.546255	0	0	0	0
112	Bsv0100-00028925	KAN4	Probable transcription factor KAN4 [Source:SWISS;Acc:Q9FJV5]	9	1.93795	2.87039	2.86972	0.617311	0.88423	0.55844	0	0	0
113	Bsv0100-00029764	-	-	9	0.770192	0.755739	0.727501	0.283166	0.643053	0.538044	0	0	0
114	Bsv0100-00029463	CBP1	Serine carboxypeptidase 1 [Source:SWISS;Acc:P37890]	9	3.43012	3.88101	2.32626	3.26935	3.02972	0.915093	0	0	0
115	Bsv0100-00030293	-	-	9	2.00344	0	1.72514	0	0	0	0	0	0
116	Bsv0100-00029362	-	-	9	9.69564	8.783	8.26699	3.91169	2.41434	2.84452	0	0	0
117	Bsv0100-00029033	-	-	9	5.5886	6.93738	6.46369	4.38422	4.2412	3.64441	0	0	0
118	Bsv0100-00033139	F22G5.20	Tropinone reductase homolog At1g07440 [Source:SWISS;Acc:Q9ASX2]	9	1.16343	1.67517	0.665759	0.748841	1.4533	0.760747	0	0	0
119	Bsv0100-00030682	NUDT20	Nudix hydrolase 20, chloroplastic [Source:SWISS;Acc:Q8VXZ0]	9	6.35014	5.69122	4.21354	3.58198	5.60624	0.485586	0	0	0
120	Bsv0100-00030683	NUDT20	Nudix hydrolase 20, chloroplastic [Source:SWISS;Acc:Q8VXZ0]	9	16.8981	3.72307	6.03479	7.75931	10.2095	4.36867	0	0	0
121	Bsv0100-00031570	-	-	9	0.981139	1.02465	1.57746	1.13786	0	0.791457	0	0	0
122	Bsv0100-00032598	CUT1	3-ketoacyl-CoA synthase 6 [Source:SWISS;Acc:Q9XF43]	9	33.1511	25.7587	31.7437	8.63474	4.70693	5.42546	0	0	0
123	Bsv0100-00032599	KCS5	3-ketoacyl-CoA synthase 5 [Source:SWISS;Acc:Q9C6L5]	9	14.6039	13.2293	23.1634	4.65919	5.82878	3.05698	0	0	0
124	Bsv0100-00032600	CUT1	3-ketoacyl-CoA synthase 6 [Source:SWISS;Acc:Q9XF43]	9	5.52131	5.50647	9.10443	2.39452	3.14269	0.371842	0	0	0
125	Bsv0100-00030414	POLX_TOBAC	Retrovirus-related Pol polyprotein from transposon TNT 1-94 [Source:SWISS;Acc:P10978]	9	9.59679	9.44113	10.9215	6.85644	8.64473	3.80631	0	0	0
126	Bsv0100-00030415	-	-	9	21.4908	22.5951	13.3904	16.1167	13.966	9.42851	0	0	0
127	Bsv0100-00031272	KNAT6	Homeobox protein knotted-1-like 6 [Source:SWISS;Acc:Q84JS6]	9	3.77026	2.44399	3.90067	0.114618	0	0	0	0	0
128	Bsv0100-00030285	XTH33	Probable xyloglucan endotransglucosylase/hydrolase protein 33 [Source:SWISS;Acc:Q8LC45]	9	5.73528	7.15917	4.05278	4.35482	3.45395	2.24468	0	0	0
129	Bsv0100-00032016	NAC098	Protein CUP-SHAPED COTYLEDON 2 [Source:SWISS;Acc:O04017]	9	0.515088	0.412517	1.10388	0.0895014	0.250751	0	0	0	0
130	Bsv0100-00032777	HMGB7	High mobility group B protein 7 [Source:SWISS;Acc:Q8LDF9]	9	0.714251	0.678773	1.82475	0.402	0.194133	0.701939	0	0	0
131	Bsv0100-00032265	-	-	9	1.14429	0.543585	1.95289	0	0	0	0	0	0
132	Bsv0100-00034895	Q9FVS9_ARATH	None [Source:SWISS;Acc:Q9FVS9]	9	12.0587	11.5075	9.36149	4.53047	5.69123	2.95492	0	0	0
133	Bsv0100-00034093	AIL5	AP2-like ethylene-responsive transcription factor AIL5 [Source:SWISS;Acc:Q6PQQ3]	9	2.44288	3.80342	6.93653	0.722174	0.680811	0.594575	0	0	0
134	Bsv0100-00034094	-	-	9	1.78542	1.88107	4.1476	0.338121	0.84257	0.252706	0	0	0
135	Bsv0100-00038953	OMT1	Caffeic acid 3-O-methyltransferase 1 [Source:SWISS;Acc:Q00763]	9	1.07315	0.994564	0.600704	1.01332	0.657054	0.26281	0	0	0
136	Bsv0100-00034165	GRXC3	Glutaredoxin-C3 [Source:SWISS;Acc:Q6K609]	9	0.834776	1.93841	6.11118	0.482269	0.448903	0	0	0	0
137	Bsv0100-00034477	Dedol-PP synthase 4	Dehydrodolichyl diphosphate synthase 4 [Source:SWISS;Acc:Q8GY03]	9	4.77049	4.88831	2.8436	3.00322	3.06739	1.64255	0	0	0
138	Bsv0100-00034628	Q39176_ARATH	None [Source:SWISS;Acc:Q39176]	9	4.42552	6.95764	8.04734	0.415294	0.257028	0.151835	0	0	0
139	Bsv0100-00034629	Q39176_ARATH	None [Source:SWISS;Acc:Q39176]	9	4.0352	4.51687	4.35712	0.84634	0.879202	0.264831	0	0	0
140	Bsv0100-00036018	WSD1	O-acyltransferase WSD1 [Source:SWISS;Acc:Q93ZR6]	9	9.30169	6.88205	8.63084	2.87412	2.19351	1.02839	0	0	0
141	Bsv0100-00035627	AtPP2C64	Probable protein phosphatase 2C 64 [Source:SWISS;Acc:Q5PNS9]	9	2.10114	0.66279	1.20233	0.416356	1.15107	0	0	0	0
142	Bsv0100-00035316	UFC	Protein UPSTREAM OF FLC [Source:SWISS;Acc:Q9LX14]	9	1.748	1.99137	3.05177	0.234263	0.247922	0.237928	0	0	0
143	Bsv0100-00037816	-	-	9	0.953147	1.23286	0.679305	1.11235	0.896268	0.794736	0	0	0
144	Bsv0100-00036723	PAP26	Bifunctional purple acid phosphatase 26 [Source:SWISS;Acc:Q949Y3]	9	2.02068	1.98296	5.98888	0.0417093	0.0793905	0	0	0	0
145	Bsv0100-00037880	SOT5	Cytosolic sulfotransferase 5 [Source:SWISS;Acc:Q9M1V2]	9	2.53445	3.15028	0.423604	1.49286	2.42936	0.474081	0	0	0
146	Bsv0100-00039213	GRF5	Growth-regulating factor 5 [Source:SWISS;Acc:Q8L8A6]	9	2.4749	2.54051	3.35613	0.868748	0.893597	0.484955	0	0	0
147	Bsv0100-00038494	-	-	9	2.38326	3.38887	1.41573	0	1.36552	1.6492	0	0	0
148	Bsv0100-00037607	SCPL17	Serine carboxypeptidase-like 17 [Source:SWISS;Acc:Q9C7D6]	9	1.45275	1.67843	3.3101	2.42646	2.54509	3.84527	0	0	0
149	Bsv0100-00038184	CCoAOMT	Caffeoyl-CoA O-methyltransferase [Source:SWISS;Acc:Q43161]	9	4.78918	1.51065	3.60718	0.368243	1.39337	0.418403	0	0	0
150	Bsv0100-00038185	CCoAOMT	Caffeoyl-CoA O-methyltransferase [Source:SWISS;Acc:Q43161]	9	5.44592	8.65969	8.88674	6.40941	3.40491	4.20809	0	0	0
151	Bsv0100-00040075	-	-	9	0.583677	1.51194	0.462962	0.460769	0.438683	0	0	0	0
152	Bsv0100-00040026	-	-	9	1.32948	1.27486	0.470614	1.53248	1.3551	1.21836	0	0	0
153	Bsv0100-00040236	FKBP8	Peptidyl-prolyl cis-trans isomerase FKBP8 [Source:SWISS;Acc:Q14318]	9	0.42603	0.818429	1.4852	2.55244	0.947444	1.13845	0	0	0
154	Bsv0100-00040458	WSD1	O-acyltransferase WSD1 [Source:SWISS;Acc:Q93ZR6]	9	1.83669	2.39205	5.02608	0.518285	0.547432	0.952952	0	0	0
155	Bsv0100-00040459	-	-	9	5.09109	3.79896	1.16903	0	2.27706	0	0	0	0
156	Bsv0100-00040644	-	-	9	9.73746	10.147	6.06111	5.96898	6.24348	3.65555	0	0	0
157	Bsv0100-00044126	NDUB7_ARATH	NADH dehydrogenase [ubiquinone] 1 beta subcomplex subunit 7 [Source:SWISS;Acc:Q9SKC9]	9	0.764003	2.20345	1.78036	1.85591	0	2.07654	0	0	0
158	Bsv0100-00042397	GDL14_ARATH	GDSL esterase/lipase At1g29660 [Source:SWISS;Acc:Q9C7N5]	9	0.790516	0.915388	1.39381	0.0601989	0.231962	0.138599	0	0	0
159	Bsv0100-00043939	OMT1	Caffeic acid 3-O-methyltransferase 1 [Source:SWISS;Acc:Q00763]	9	0.735405	1.15312	0.538601	0.58284	0.425758	0.40867	0	0	0
160	Bsv0100-00043115	-	-	9	1.26565	0.990427	1.44733	1.43	0.687738	0.280081	0	0	0
161	Bsv0100-00044831	AHP6	Histidine-containing phosphotransfer protein 6 [Source:SWISS;Acc:Q9SSC9]	9	1.84774	1.97004	2.24163	0.423984	0.309301	0	0	0	0
162	Bsv0100-00045196	SHN2	Ethylene-responsive transcription factor SHINE 2 [Source:SWISS;Acc:Q9LFN7]	9	9.22518	9.87634	3.49192	7.91845	6.98503	5.03901	0	0	0
163	Bsv0100-00045264	-	-	9	4.79976	5.70198	2.6724	5.94533	4.02681	1.59673	0	0	0
164	Bsv0100-00045335	-	-	9	5.33143	4.49927	4.20837	3.79453	5.01801	1.11284	0	0	0
165	Bsv0100-00053407	E3SXU4_PEA	None [Source:SWISS;Acc:E3SXU4]	9	0.650458	0.881633	0.57961	0.596526	0.356549	0.246413	0	0	0
166	Bsv0100-00045370	HSP17.9-D	17.9 kDa class II heat shock protein [Source:SWISS;Acc:P05477]	9	0.810936	0.923015	0.388844	0.291593	0.553243	0.553434	0	0	0
167	Bsv0100-00045885	-	-	9	6.04812	16.7791	14.5184	7.64237	0	17.411	0	0	0
168	Bsv0100-00047218	CYP77A3	Cytochrome P450 77A3 [Source:SWISS;Acc:O48928]	9	0.3975	0.695182	0.729487	0.0865149	0.0820305	0.0252252	0	0	0
169	Bsv0100-00047175	SILD_FORIN	Secoisolariciresinol dehydrogenase [Source:SWISS;Acc:Q94KL7]	9	4.12099	4.63283	4.05722	3.84711	3.04978	4.09353	0	0	0
170	Bsv0100-00046713	MYB39	Transcription factor MYB39 [Source:SWISS;Acc:Q8GWP0]	9	3.76556	4.43733	2.56321	2.91003	1.90442	1.1328	0	0	0
171	Bsv0100-00047155	WSD1	O-acyltransferase WSD1 [Source:SWISS;Acc:Q93ZR6]	9	11.0015	8.47937	9.84461	3.05718	2.72362	1.5603	0	0	0
172	Bsv0100-00046996	AS	Hydroquinone glucosyltransferase [Source:SWISS;Acc:Q9AR73]	9	1.48431	1.2441	0.936149	0.147436	0.14078	0.113175	0	0	0
173	Bsv0100-00048321	GDL71_ARATH	GDSL esterase/lipase At5g03610 [Source:SWISS;Acc:Q9LZS7]	9	1.46247	1.5953	2.44029	0.346767	0.321488	0.39275	0	0	0
174	Bsv0100-00048167	-	-	9	3.65545	5.11014	5.42269	4.21351	6.57734	2.42959	0	0	0
175	Bsv0100-00048492	-	-	9	1.76197	1.14484	1.98265	0.543695	0.877499	0.229323	0	0	0
176	Bsv0100-00048651	CYP77A3	Cytochrome P450 77A3 [Source:SWISS;Acc:O48928]	9	0.522618	0.461838	0.844788	0.0478332	0.0226037	0.0276468	0	0	0
177	Bsv0100-00048722	sconB	Probable E3 ubiquitin ligase complex SCF subunit sconB [Source:SWISS;Acc:C5FP68]	9	2.98188	1.02695	1.54981	0.479447	1.17707	0	0	0	0
178	Bsv0100-00049137	14KD_DAUCA	14 kDa proline-rich protein DC2.15 [Source:SWISS;Acc:P14009]	9	3.75755	3.96395	5.94937	1.30123	1.38377	1.21783	0	0	0
179	Bsv0100-00050453	GDL28_ARATH	GDSL esterase/lipase At1g71250 [Source:SWISS;Acc:Q9FVV1]	9	3.64401	3.71739	4.30436	0.821253	1.0174	0.942782	0	0	0
180	Bsv0100-00050550	-	-	9	2.6264	2.62165	4.32759	0.504573	0.698256	0.28643	0	0	0
181	Bsv0100-00050605	NAC098	Protein CUP-SHAPED COTYLEDON 2 [Source:SWISS;Acc:O04017]	9	0.482608	0.559559	1.06381	0.0832139	0.15534	0.046529	0	0	0
182	Bsv0100-00050754	-	-	9	8.80696	7.57977	7.12512	0.948274	1.77975	1.07065	0	0	0
183	Bsv0100-00050768	-	-	9	0.830683	0.848415	1.07054	0.674675	0.964896	0.307826	0	0	0
184	Bsv0100-00050947	Os07g0190000	Probable 1-deoxy-D-xylulose-5-phosphate synthase 2, chloroplastic [Source:SWISS;Acc:Q6YU51]	9	2.76932	2.6208	2.24042	2.22396	1.71072	1.2781	0	0	0
185	Bsv0100-00050958	-	-	9	0.986843	0.30916	1.78962	0.380196	0	0.860068	0	0	0
186	Bsv0100-00051528	FBK50_ARATH	F-box/kelch-repeat protein At3g06240 [Source:SWISS;Acc:Q8GXC7]	9	2.31345	1.63406	2.28144	0.457266	0.776103	0.271935	0	0	0
187	Bsv0100-00051858	CEL3	Endoglucanase 9 [Source:SWISS;Acc:Q9C9H5]	9	1.20513	0.992979	0.453503	0.428213	0.576884	0.407824	0	0	0
188	Bsv0100-00052630	SILD_FORIN	Secoisolariciresinol dehydrogenase [Source:SWISS;Acc:Q94KL7]	9	2.56769	3.42991	4.58362	1.07444	1.30201	0.989804	0	0	0
189	Bsv0100-00052691	-	-	9	0.804886	1.01204	1.09041	0.267434	0.386126	0	0	0	0
190	Bsv0100-00053610	MYB39	Transcription factor MYB39 [Source:SWISS;Acc:Q8GWP0]	9	4.61316	4.26018	2.94483	3.549	2.46077	2.05555	0	0	0
191	Bsv0100-00053676	IQD31	Protein IQ-DOMAIN 31 [Source:SWISS;Acc:Q8L4D8]	9	0.953457	0.809247	0.815343	0.125636	0.358572	0.285561	0	0	0
192	Bsv0100-00053734	-	-	9	0.508011	0.475836	1.74015	1.20561	1.11422	1.355	0	0	0
193	Bsv0100-00053769	-	-	9	5.04352	5.03156	4.13449	0.483972	0.889595	0.819616	0	0	0
194	Bsv0100-00054067	PDF2.5	Defensin-like protein 6 [Source:SWISS;Acc:Q9FFP8]	9	1.38245	2.86948	7.53922	0.978189	1.087	1.49406	0	0	0
195	Bsv0100-00054343	NRPE5C	DNA-directed RNA polymerase V subunit 5C [Source:SWISS;Acc:Q9M1H8]	9	5.14477	5.87559	8.45169	5.26438	3.91595	1.68734	0	0	0
196	Bsv0100-00054417	-	-	9	1.87119	1.45902	0.864387	0.437938	0.836551	0	0	0	0
197	Bsv0100-00054721	ABCG1	ABC transporter G family member 1 [Source:SWISS;Acc:O80946]	9	0.960566	0.999231	0.495541	0.933316	0.617615	0.418722	0	0	0
198	Bsv0100-00054989	-	-	9	3.67929	3.48439	2.17416	0.980838	1.04049	0.865061	0	0	0
199	Bsv0100-00055108	GRF5	Growth-regulating factor 5 [Source:SWISS;Acc:Q8L8A6]	9	1.64782	0.777723	1.31349	0.38953	0.297954	0.173464	0	0	0
